# Supplementary material
Source: PubMed Central journal article supplement (PMC3615580)
Supplement: supp1A.pdf [file supp1A.pdf]

## Up-Regulated Transcripts (u133A U133B)

| Fold Change | Gene ID | Gene Identifier | Other ID    | Gene Title                                                                               | UG Cluster | LocusLink | Chromosome |
|-------------|---------|-----------------|-------------|------------------------------------------------------------------------------------------|------------|-----------|------------|
| 94.2        | NID1    | BF940043        | 202007_at   | Nidogen 1                                                                                | Hs.356624  | 4811      | 1          |
| 84.6        | LGALS1  | NM_002305       | 201105_at   | Lectin, galactoside-binding, soluble, 1                                                  | Hs.445351  | 3956      | 22         |
| 76.1        | HGD     | NM_000187       | 205221_at   | Homogentisate 1,2-dioxygenase (homogentisate oxidase)                                    | Hs.616526  | 3081      | 3          |
| 64.8        | PPBP    | R64130          | 214146_s_at | Pro-platelet basic protein (chemokine (C-X-C motif) ligand 7)                            | Hs.2164    | 5473      | 4          |
| 55.9        | ITGB3   | M35999          | 204627_s_at | Integrin, beta 3 (platelet glycoprotein IIIa, antigen CD61)                              | Hs.218040  | 3690      | 17         |
| 51.2        | F13A1   | NM_000129       | 203305_at   | Coagulation factor XIII, A1 polypeptide                                                  | Hs.335513  | 2162      | 6          |
| 44.3        | PROS1   | NM_000313       | 207808_s_at | Protein S (alpha)                                                                        | Hs.64016   | 5627      | 3          |
| 44.2        | LAT     | AF036905        | 209881_s_at | Linker for activation of T cells                                                         | Hs.632179  | 27040     | 16         |
| 37.6        | COL6A3  | NM_004369       | 201438_at   | Collagen, type VI, alpha 3                                                               | Hs.233240  | 1293      | 2          |
| 34.3        | FCGR2C  | U90939          | 210992_x_at | Fc fragment of IgG, low affinity IIc, receptor for (CD32)                                | Hs.713617  | 9103      | 1          |
| 33.8        | CLCN4   | AF052117        | 214769_at   | Chloride channel 4                                                                       | Hs.495674  | 1183      | X          |
| 33.2        | TUBB1   | NM_030773       | 208601_s_at | Tubulin, beta 1                                                                          | Hs.303023  | 81027     | 20         |
| 29.8        | GP5     | NM_004488       | 207926_at   | Glycoprotein V (platelet)                                                                | Hs.73734   | 2814      | 3          |
| 29.5        | THBS1   | AV726673        | 201109_s_at | Thrombospondin 1                                                                         | Hs.164226  | 7057      | 15         |
| 27.8        | PCSK6   | NM_002570       | 207414_s_at | Proprotein convertase subtilisin/kexin type 6                                            | Hs.498494  | 5046      | 15         |
| 26.5        | SLC24A3 | NM_020689       | 219090_at   | Solute carrier family 24 (sodium/potassium/calcium exchanger), member 3                  | Hs.654790  | 57419     | 20         |
| 26.0        | RASGRP3 | NM_015376       | 205801_s_at | RAS guanyl releasing protein 3 (calcium and DAG-regulated)                               | Hs.143674  | 25780     | 2          |
| 25.6        | RASA3   | NM_007368       | 206221_at   | RAS p21 protein activator 3                                                              | Hs.593075  | 22821     | 13         |
| 25.0        | CETP    | NM_000078       | 206210_s_at | Cholesteryl ester transfer protein, plasma                                               | Hs.89538   | 1071      | 16         |
| 22.0        | ABCC3   | NM_020037       | 208161_s_at | ATP-binding cassette, sub-family C (CFTR/MRP), member 3                                  | -          | 8714      | -          |
| 21.6        | SCD     | AB032261        | 200832_s_at | Stearoyl-CoA desaturase (delta-9-desaturase)                                             | Hs.558396  | 6319      | 10         |
| 21.6        | CALD1   | AL583520        | 212077_at   | Caldesmon 1                                                                              | Hs.490203  | 800       | 7          |
| 20.8        | RAB27B  | NM_004163       | 207017_at   | RAB27B, member RAS oncogene family                                                       | Hs.25318   | 5874      | 18         |
| 20.4        | MYLK    | NM_005965       | 202555_s_at | myosin light chain kinase                                                                | -          | 4638      | -          |
| 20.1        | PF4V1   | NM_002620       | 207815_at   | Platelet factor 4 variant 1                                                              | Hs.72933   | 5197      | 4          |
| 19.4        | DAAM1   | AK021890        | 216060_s_at | Dishevelled associated activator of morphogenesis 1                                      | Hs.654934  | 23002     | 14         |
| 19.2        | LTBP1   | AI986120        | 202728_s_at | Latent transforming growth factor beta binding protein 1                                 | Hs.713533  | 4052      | 2          |
| 18.2        | GNG11   | NM_004126       | 204115_at   | Guanine nucleotide binding protein (G protein), gamma 11                                 | Hs.83381   | 2791      | 7          |
| 17.9        | FYB     | AF198052        | 211795_s_at | FYN binding protein (FYB-120/130)                                                        | Hs.370503  | 2533      | 5          |
| 17.5        | PF4     | NM_002619       | 206390_x_at | Platelet factor 4                                                                        | Hs.81564   | 5196      | 4          |
| 17.2        | ITGA2B  | AF098114        | 216956_s_at | Integrin, alpha 2b (platelet glycoprotein IIb of IIb/IIIa complex, antigen CD41)         | Hs.411312  | 3674      | 17         |
| 16.8        | IL21R   | NM_021798       | 219971_at   | Interleukin 21 receptor                                                                  | Hs.210546  | 50615     | 16         |
| 16.8        | ARHGAP6 | NM_001174       | 206167_s_at | Rho GTPase activating protein 6                                                          | -          | 395       | -          |
| 16.6        | PBX1    | NM_002585       | 205253_at   | Pre-B-cell leukemia homeobox 1                                                           | Hs.557097  | 5087      | 1          |
| 16.2        | TTK     | NM_003318       | 204822_at   | TTK protein kinase                                                                       | Hs.169840  | 7272      | 6          |
| 15.7        | SCAMOL  | AV704962        | 209146_at   | Transcribed locus                                                                        | Hs.593050  | -         | 4          |
| 15.1        | LY6G6D  | NM_021246       | 207457_s_at | Lymphocyte antigen 6 complex, locus G6D                                                  | Hs.591792  | 58530     | 6          |
| 14.5        | LRP12   | NM_013437       | 220253_s_at | Low density lipoprotein-related protein 12                                               | Hs.600630  | 29967     | 8          |
| 13.6        | FADS2   | NM_004265       | 202218_s_at | Fatty acid desaturase 2                                                                  | Hs.502745  | 9415      | 11         |
| 13.5        | CSAR1   | NM_001736       | 220088_at   | Complement component 5a receptor 1                                                       | Hs.2161    | 728       | 19         |
| 13.3        | RHAG    | AF178841        | 206146_s_at | Rh-associated glycoprotein                                                               | Hs.120950  | 6005      | 6          |
| 13.1        | TMEM158 | BF062629        | 213338_at   | Transmembrane protein 158                                                                | Hs.716411  | 25907     | 3          |
| 13.1        | MPO     | J02694          | 203948_s_at | Myeloperoxidase                                                                          | Hs.458272  | 4353      | 17         |
| 12.9        | MAOB    | NM_000898       | 204041_at   | Monoamine oxidase B                                                                      | Hs.654473  | 4129      | X          |
| 12.6        | VDR     | NM_000376       | 204254_s_at | Vitamin D (1,25-dihydroxyvitamin D3) receptor                                            | Hs.524368  | 7421      | 12         |
| 12.5        | EPB49   | NM_001978       | 204505_s_at | Erythrocyte membrane protein band 4.9 (dematin)                                          | Hs.106124  | 2039      | 8          |
| 12.3        | WIPI1   | NM_017983       | 203827_at   | WD repeat domain, phosphoinositide interacting 1                                         | Hs.463964  | 55062     | 17         |
| 12.1        | CD9     | NM_001769       | 201005_at   | CD9 molecule                                                                             | Hs.114286  | 928       | 12         |
| 11.7        | GP1BA   | NM_000173       | 207389_at   | Glycoprotein Ib (platelet), alpha polypeptide                                            | Hs.1472    | 2811      | 17         |
| 11.6        | NRGN    | NM_006176       | 204081_at   | Neurogranin (protein kinase C substrate, RC3)                                            | Hs.524116  | 4900      | 11         |
| 11.4        | SLC4A2  | NM_003040       | 202111_at   | Solute carrier family 4, anion exchanger, member 2 (erythrocyte membrane protein band 3) | Hs.647069  | 6522      | 7          |
| 11.3        | PLEKHG3 | AI738980        | 212823_s_at | Pleckstrin homology domain containing, family G (with RhoGef domain) member 3            | Hs.509637  | 26030     | 14         |
| 11.1        | RDH11   | AF167438        | 217776_at   | Retinol dehydrogenase 11 (all-trans/9-cis/11-cis)                                        | Hs.226007  | 51109     | 14         |
| 11.0        | SAMD14  | AL134453        | 213866_at   | Sterile alpha motif domain containing 14                                                 | Hs.567769  | 201191    | 17         |

## Up-Regulated Transcripts (u133A U133B)

|      |         |           |             |                                                                                         |           |        |     |
|------|---------|-----------|-------------|-----------------------------------------------------------------------------------------|-----------|--------|-----|
| 10.7 | CDKN2D  | U20498    | 210240_s_at | Cyclin-dependent kinase inhibitor 2D (p19, inhibits CDK4)                               | Hs.435051 | 1032   | 19  |
| 10.6 | MED8    | BG230758  | 213126_at   | Mediator complex subunit 8                                                              | Hs.301756 | 112950 | 1   |
| 10.4 | ITGA6   | AV733308  | 215177_s_at | Integrin, alpha 6                                                                       | Hs.133397 | 3655   | 2   |
| 10.1 | FADS1   | BG165833  | 208963_x_at | Fatty acid desaturase 1                                                                 | Hs.503546 | 3992   | 11  |
| 10.1 | NCKAP1  | NM_013436 | 207738_s_at | NCK-associated protein 1                                                                | Hs.603732 | 10787  | 2   |
| 10.1 | FLNA    | AW051856  | 213746_s_at | filamin A, alpha (actin binding protein 280)                                            | -         | -      | -   |
| 9.8  | CDC2    | AL524035  | 203213_at   | Cell division cycle 2, G1 to S and G2 to M                                              | Hs.334562 | 983    | 10  |
| 9.6  | ARPC4   | NM_005718 | 217818_s_at | Actin related protein 2/3 complex, subunit 4, 20kDa                                     | Hs.323342 | 10093  | 3   |
| 9.5  | LSS     | AW084510  | 202245_at   | Lanosterol synthase (2,3-oxidosqualene-lanosterol cyclase)                              | Hs.596543 | 4047   | 21  |
| 9.2  | CENPE   | NM_001813 | 205046_at   | Centromere protein E, 312kDa                                                            | Hs.75573  | 1062   | 4   |
| 9.2  | FCGR2A  | NM_021642 | 203561_at   | Fc fragment of IgG, low affinity IIa, receptor (CD32)                                   | Hs.352642 | 2212   | 1   |
| 9.2  | SQLE    | AF098865  | 209218_at   | Squalene epoxidase                                                                      | Hs.71465  | 6713   | 8   |
| 9.1  | PDLIM5  | AK027217  | 216804_s_at | PDZ and LIM domain 5                                                                    | Hs.480311 | 10611  | 4   |
| 9.1  | GMPR    | NM_006877 | 204187_at   | Guanosine monophosphate reductase                                                       | Hs.484741 | 2766   | 6   |
| 9.1  | DUSP7   | AI655015  | 213848_at   | MRNA; cDNA DKFzp586F2224 (from clone DKFzp586F2224)                                     | Hs.595184 | -      | 3   |
| 9.0  | PTGER3  | L27489    | 210831_s_at | Prostaglandin E receptor 3 (subtype EP3)                                                | Hs.445000 | 5733   | 1   |
| 9.0  | TRHDE   | NM_013381 | 219937_at   | Thyrotropin-releasing hormone degrading enzyme                                          | Hs.199814 | 29953  | 12  |
| 9.0  | SNAP23  | U55936    | 209131_s_at | Synaptosomal-associated protein, 23kDa                                                  | Hs.719238 | 8773   | 15  |
| 8.9  | ME1     | NM_002395 | 204059_s_at | Malic enzyme 1, NADP(+)-dependent, cytosolic                                            | Hs.21160  | 4199   | 6   |
| 8.8  | PDGFB   | NM_002608 | 204200_s_at | Platelet-derived growth factor beta polypeptide (simian sarcoma viral (v-sis) oncogene) | Hs.1976   | 5155   | 22  |
| 8.7  | CCRL2   | AF015524  | 211434_s_at | Chemokine (C-C motif) receptor-like 2                                                   | Hs.535713 | 9034   | 3   |
| 8.7  | LCN2    | NM_005564 | 212531_at   | Lipocalin 2                                                                             | Hs.204238 | 3934   | 9   |
| 8.6  | IL9R    | NM_002186 | 208164_s_at | Interleukin 9 receptor                                                                  | Hs.406228 | 3581   | X Y |
| 8.6  | FBXO38  | NM_024862 | 219608_s_at | F-box protein 38                                                                        | -         | 81545  | -   |
| 8.5  | EHD3    | NM_014600 | 218935_at   | EH-domain containing 3                                                                  | Hs.368808 | 30845  | 2   |
| 8.4  | GBA     | D13287    | 210589_s_at | Glucosidase, beta; acid (includes glucosylceramidase)                                   | Hs.282997 | 2629   | 1   |
| 8.3  | FKBP1B  | NM_004116 | 206857_s_at | FK506 binding protein 1B, 12.6 kDa                                                      | Hs.709461 | 2281   | 2   |
| 8.3  | TRPC6   | NM_004621 | 206528_at   | Transient receptor potential cation channel, subfamily C, member 6                      | Hs.159003 | 7225   | 11  |
| 8.2  | CCND1   | M73554    | 208712_at   | Cyclin D1                                                                               | Hs.523852 | 595    | 11  |
| 8.2  | DHCR7   | NM_001360 | 201791_s_at | 7-dehydrocholesterol reductase                                                          | Hs.503134 | 1717   | 11  |
| 8.1  | PPIF    | NM_005729 | 201490_s_at | Peptidylprolyl isomerase F                                                              | Hs.381072 | 10105  | 10  |
| 8.0  | CANT1   | AK026161  | 221732_at   | Calcium activated nucleotidase 1                                                        | Hs.8859   | 124583 | 17  |
| 8.0  | PRKCA   | AF035594  | 215195_at   | Protein kinase C, alpha                                                                 | Hs.531704 | 5578   | 17  |
| 8.0  | CMAS    | NM_018686 | 218111_s_at | Cytidine monophosphate N-acetylneuraminic acid synthetase                               | Hs.311346 | 55907  | 12  |
| 7.9  | SNCA    | BG260394  | 204466_s_at | Synuclein, alpha (non A4 component of amyloid precursor)                                | Hs.21374  | 6622   | 4   |
| 7.9  | -       | AU158818  | 213514_s_at | Transcribed locus                                                                       | Hs.707083 | -      | 5   |
| 7.9  | HBG1    | NM_000559 | 204848_x_at | Hemoglobin, gamma A                                                                     | Hs.712539 | 3047   | 11  |
| 7.8  | COCH    | AA669336  | 205229_s_at | Coagulation factor C homolog, cochlin (Limulus polyphemus)                              | Hs.21016  | 1690   | 14  |
| 7.8  | ADAM10  | AU135154  | 214895_s_at | ADAM metallopeptidase domain 10                                                         | Hs.578508 | 102    | 15  |
| 7.8  | HGD     | AI478172  | 214307_at   | Homogentisate 1,2-dioxygenase (homogentisate oxidase)                                   | Hs.616526 | 3081   | 3   |
| 7.8  | ACAT2   | BC000408  | 209608_s_at | Acetyl-Coenzyme A acetyltransferase 2                                                   | Hs.571037 | 39     | 6   |
| 7.8  | GFI1B   | NM_004188 | 208501_at   | Growth factor independent 1B transcription repressor                                    | Hs.553160 | 8328   | 9   |
| 7.8  | INSIG1  | BE300521  | 201625_s_at | Insulin induced gene 1                                                                  | Hs.520819 | 3638   | 7   |
| 7.7  | ATP2C1  | AF225981  | 209934_s_at | ATPase, Ca++ transporting, type 2C, member 1                                            | Hs.584884 | 27032  | 3   |
| 7.7  | DCLRE1A | D42045    | 209804_at   | DNA cross-link repair 1A (PSO2 homolog, S. cerevisiae)                                  | Hs.1560   | 9937   | 10  |
| 7.7  | TBC1D9  | AI348094  | 212956_at   | TBC1 domain family, member 9 (with GRAM domain)                                         | Hs.480819 | 23158  | 4   |
| 7.7  | SMAD6   | NM_005585 | 207069_s_at | SMAD family member 6                                                                    | Hs.153863 | 4091   | 15  |
| 7.7  | ACTN1   | BC003576  | 208637_x_at | Actinin, alpha 1                                                                        | Hs.509765 | 87     | 14  |
| 7.6  | BANK1   | NM_017935 | 219667_s_at | B-cell scaffold protein with ankyrin repeats 1                                          | Hs.480400 | 55024  | 4   |
| 7.6  | HBD     | NM_000519 | 206834_at   | Hemoglobin, delta                                                                       | Hs.699280 | 3045   | 11  |
| 7.6  | MTSS1   | NM_014751 | 203037_s_at | Metastasis suppressor 1                                                                 | Hs.336994 | 9788   | 8   |
| 7.6  | HEXIM1  | AW193511  | 202814_s_at | Hexamethylene bis-acetamide inducible 1                                                 | Hs.716487 | 10614  | 17  |
| 7.6  | GNB5    | NM_016194 | 204000_at   | Guanine nucleotide binding protein (G protein), beta 5                                  | Hs.155090 | 10681  | 15  |
| 7.6  | CHST6   | NM_021615 | 221059_s_at | Carbohydrate (N-acetylglucosamine 6-O) sulfotransferase 6                               | Hs.655622 | 4166   | 16  |
| 7.5  | VCL     | NM_014000 | 200931_s_at | Vinculin                                                                                | Hs.643896 | 7414   | 10  |
| 7.5  | BUB1    | AL137654  | 215509_s_at | budding uninhibited by benzimidazoles 1 homolog (yeast)                                 | -         | -      | -   |
| 7.4  | TPM4    | AI214061  | 212481_s_at | Tropomyosin 4                                                                           | Hs.631618 | 7171   | 19  |

## Up-Regulated Transcripts (u133A U133B)

|     |          |           |             |                                                                                      |           |       |    |
|-----|----------|-----------|-------------|--------------------------------------------------------------------------------------|-----------|-------|----|
| 7.4 | IDH1     | NM_005896 | 201193_at   | Isocitrate dehydrogenase 1 (NADP+), soluble                                          | Hs.593422 | 3417  | 2  |
| 7.4 | TMEM127  | NM_017849 | 219460_s_at | Transmembrane protein 127                                                            | Hs.355708 | 55654 | 2  |
| 7.3 | KAZN     | AB028949  | 213478_at   | kazrin                                                                               | -         | 23254 | -  |
| 7.3 | ACTBP9   | D50604    | 217211_at   | actin, beta pseudogene 9                                                             | -         | 69    | -  |
| 7.3 | DNAUC6   | AV729634  | 204720_s_at | Dnal (Hsp40) homolog, subfamily C, member 6                                          | Hs.647643 | 9829  | 1  |
| 7.3 | CDR2     | AL582414  | 209501_at   | Cerebellar degeneration-related protein 2, 62kDa                                     | Hs.513430 | 1039  | 16 |
| 7.3 | SLC30A5  | NM_022902 | 218989_x_at | Solute carrier family 30 (zinc transporter), member 5                                | Hs.631975 | 64924 | 5  |
| 7.2 | HMGCR    | NM_000859 | 202540_s_at | 3-hydroxy-3-methylglutaryl-Coenzyme A reductase                                      | Hs.713530 | 3156  | 5  |
| 7.2 | CDYL     | NM_004824 | 203100_s_at | Chromodomain protein, Y-like                                                         | Hs.269092 | 9425  | 6  |
| 7.2 | ZNF407   | NM_017757 | 220835_s_at | Zinc finger protein 407                                                              | Hs.536490 | 55628 | 18 |
| 7.2 | ITGB5    | NM_002213 | 201125_s_at | Integrin, beta 5                                                                     | Hs.536663 | 3693  | 3  |
| 7.1 | HDC      | NM_002112 | 207067_s_at | Histidine decarboxylase                                                              | Hs.1481   | 3067  | 15 |
| 7.1 | CD226    | NM_006566 | 207315_at   | CD226 molecule                                                                       | Hs.660130 | 10666 | 18 |
| 7.1 | DHCR24   | NM_014762 | 200862_at   | 24-dehydrocholesterol reductase                                                      | Hs.498727 | 1718  | 1  |
| 7.1 | C16orf53 | NM_024516 | 218300_at   | Chromosome 16 open reading frame 53                                                  | Hs.702841 | 79447 | 16 |
| 7.1 | F2R      | NM_001992 | 203989_x_at | Coagulation factor II (thrombin) receptor                                            | Hs.482562 | 2149  | 5  |
| 7.0 | SEC24D   | NM_014822 | 202375_at   | SEC24 family, member D (S. cerevisiae)                                               | Hs.189641 | 9871  | 4  |
| 7.0 | SLC2A6   | NM_017585 | 220091_at   | Solute carrier family 2 (facilitated glucose transporter), member 6                  | Hs.244378 | 11182 | 9  |
| 7.0 | PRKCD    | NM_006254 | 202545_at   | Protein kinase C, delta                                                              | Hs.155342 | 5580  | 3  |
| 7.0 | BCL2L1   | NM_001191 | 206665_s_at | BCL2-like 1                                                                          | Hs.516966 | 598   | 20 |
| 7.0 | IL9RP3   | Z84723    | 217212_s_at | interleukin 9 receptor /// interleukin 9 receptor pseudogene 3                       | -         | -     | -  |
| 6.9 | STAM2    | AL133600  | 209649_at   | Signal transducing adaptor molecule (SH3 domain and ITAM motif) 2                    | Hs.17200  | 10254 | 2  |
| 6.9 | ITSN1    | AF114488  | 209298_s_at | Intersectin 1 (SH3 domain protein)                                                   | Hs.160324 | 6453  | 21 |
| 6.9 | XYLT2    | NM_022167 | 219401_at   | Xylosyltransferase II                                                                | Hs.463416 | 64132 | 17 |
| 6.7 | CTR9     | NM_014633 | 202060_at   | Ctr9, Paf1/RNA polymerase II complex component, homolog (S. cerevisiae)              | Hs.719124 | 9646  | 11 |
| 6.7 | SEPX1    | NM_016332 | 217977_at   | Selenoprotein X, 1                                                                   | Hs.655346 | 51734 | 16 |
| 6.7 | PLEK     | NM_002664 | 203471_s_at | Pleckstrin                                                                           | Hs.468840 | 5341  | 2  |
| 6.7 | PRUNE    | AF123539  | 209586_s_at | Prune homolog (Drosophila)                                                           | Hs.78524  | 58497 | 1  |
| 6.6 | NFIB     | BC001283  | 209290_s_at | Nuclear factor I/B                                                                   | Hs.644095 | 4781  | 9  |
| 6.6 | SLC9A1   | M81768    | 209453_at   | Solute carrier family 9 (sodium/hydrogen exchanger), member 1                        | Hs.469116 | 6548  | 1  |
| 6.6 | PECAM1   | M37780    | 208983_s_at | Platelet/endothelial cell adhesion molecule                                          | Hs.514412 | 5175  | 17 |
| 6.6 | PDLIM7   | AA086229  | 214121_x_at | PDZ and LIM domain 7 (enigma)                                                        | Hs.533040 | 9260  | 5  |
| 6.6 | DUSP7    | X93921    | 214793_at   | Dual specificity phosphatase 7                                                       | Hs.591664 | 1849  | 3  |
| 6.6 | NR2F6    | BC002669  | 209262_s_at | Nuclear receptor subfamily 2, group F, member 6                                      | Hs.466148 | 2063  | 19 |
| 6.6 | RTN1     | NM_021136 | 203485_at   | Reticulon 1                                                                          | Hs.368626 | 6252  | 14 |
| 6.5 | PIK3CB   | BC003393  | 212688_at   | Phosphoinositide-3-kinase, catalytic, beta polypeptide                               | Hs.239818 | 5291  | 3  |
| 6.5 | GP9      | NM_000174 | 206883_x_at | Glycoprotein IX (platelet)                                                           | Hs.1144   | 2815  | 3  |
| 6.4 | SACM1L   | NM_014016 | 202797_at   | SAC1 suppressor of actin mutations 1-like (yeast)                                    | Hs.156509 | 22908 | 3  |
| 6.4 | DNM3     | AL136712  | 209839_at   | Dynammin 3                                                                           | Hs.654775 | 26052 | 1  |
| 6.4 | TWSG1    | NM_020648 | 219201_s_at | Twisted gastrulation homolog 1 (Drosophila)                                          | Hs.514685 | 57045 | 18 |
| 6.4 | MMRN1    | NM_007351 | 205612_at   | Multimerin 1                                                                         | Hs.268107 | 22915 | 4  |
| 6.4 | CTDSPL   | BF590317  | 201905_s_at | CTD (carboxy-terminal domain, RNA polymerase II, polypeptide A) small phosphatase-li | Hs.475963 | 10217 | 3  |
| 6.4 | PPAP2B   | AV725664  | 212230_at   | Phosphatidic acid phosphatase type 2B                                                | Hs.715848 | 8613  | 1  |
| 6.4 | OGFRL1   | NM_024576 | 219582_at   | Opioid growth factor receptor-like 1                                                 | Hs.656091 | 79627 | 6  |
| 6.3 | ENDOD1   | AF131747  | 212573_at   | Endonuclease domain containing 1                                                     | Hs.167115 | 23052 | 11 |
| 6.3 | CTTN     | NM_005231 | 201059_at   | Cortactin                                                                            | Hs.596164 | 2017  | 11 |
| 6.2 | SLC10A3  | NM_019848 | 204928_s_at | Solute carrier family 10 (sodium/bile acid cotransporter family), member 3           | Hs.522826 | 8273  | X  |
| 6.2 | ASAP2    | NM_003887 | 206414_s_at | ArfGAP with SH3 domain, ankyrin repeat and PH domain 2                               | Hs.555902 | 8853  | 2  |
| 6.2 | XK       | NM_021083 | 206698_at   | X-linked Kx blood group (McLeod syndrome)                                            | Hs.78919  | 7504  | X  |
| 6.2 | HMGCS1   | BG035985  | 221750_at   | Transcribed locus                                                                    | Hs.602526 | -     | 5  |
| 6.2 | TOP2A    | AL561834  | 201292_at   | Topoisomerase (DNA) II alpha 170kDa                                                  | Hs.156346 | 7153  | 17 |
| 6.1 | HMMR     | NM_012485 | 207165_at   | Hyaluronan-mediated motility receptor (RHAMM)                                        | Hs.72550  | 3161  | 5  |
| 6.1 | PIGN     | NM_012327 | 219048_at   | Phosphatidylinositol glycan anchor biosynthesis, class N                             | Hs.157031 | 23556 | 18 |
| 6.1 | RNF24    | NM_007219 | 204669_s_at | Ring finger protein 24                                                               | Hs.589884 | 11237 | 20 |
| 6.1 | TMEM45A  | NM_018004 | 219410_at   | Transmembrane protein 45A                                                            | Hs.658956 | 55076 | 3  |
| 6.0 | NMT1     | AI570834  | 201158_at   | N-myristoyltransferase 1                                                             | Hs.532790 | 4836  | 17 |
| 6.0 | GK       | AJ252550  | 217167_x_at | glycerol kinase                                                                      | -         | -     | -  |

## Up-Regulated Transcripts (u133A U133B)

|     |           |           |             |                                                                                        |           |        |    |
|-----|-----------|-----------|-------------|----------------------------------------------------------------------------------------|-----------|--------|----|
| 5.9 | MVK       | AF217536  | 215649_s_at | mevalonate kinase                                                                      | -         | 4598   | -  |
| 5.9 | ERCC6L    | NM_017669 | 219650_at   | Excision repair cross-complementing rodent repair deficiency, complementation group    | Hs.47558  | 54821  | X  |
| 5.9 | CAMK1     | NM_003656 | 204392_at   | Calcium/calmodulin-dependent protein kinase I                                          | Hs.434875 | 8536   | 3  |
| 5.9 | UBE2C     | NM_007019 | 202954_at   | Ubiquitin-conjugating enzyme E2C                                                       | Hs.93002  | 11065  | 20 |
| 5.8 | GTF2A1L   | BG434174  | 213413_at   | General transcription factor IIA, 1-like                                               | Hs.44385  | 11036  | 2  |
| 5.8 | HBG2      | NM_000184 | 204419_x_at | Hemoglobin, gamma G                                                                    | Hs.302145 | 3048   | 11 |
| 5.8 | DLC1      | AF026219  | 210762_s_at | Deleted in liver cancer 1                                                              | Hs.134296 | 10395  | 8  |
| 5.8 | LOC391012 | AL031737  | 217210_at   | Human DNA sequence from clone 8B22 on chromosome 1p35.1-36.21 Contains gene si         | -         | -      | -  |
| 5.8 | SLC44A1   | AW971205  | 222364_at   | solute carrier family 44, member 1                                                     | -         | -      | -  |
| 5.8 | YKT6      | BE384482  | 217784_at   | YKT6 v-SNARE homolog ( <i>S. cerevisiae</i> )                                          | Hs.520794 | 10652  | 7  |
| 5.8 | TM7SF2    | AF096304  | 210130_s_at | Transmembrane 7 superfamily member 2                                                   | Hs.31130  | 7108   | 11 |
| 5.8 | MTAP      | AF109294  | 211363_s_at | methylthioadenosine phosphorylase                                                      | -         | 4507   | -  |
| 5.8 | PTGIR     | NM_000960 | 206187_at   | Prostaglandin I2 (prostacyclin) receptor (IP)                                          | Hs.458324 | 5739   | 19 |
| 5.7 | SSX2IP    | AU152583  | 203018_s_at | Synovial sarcoma, X breakpoint 2 interacting protein                                   | Hs.22587  | 117178 | 1  |
| 5.7 | CDH26     | AL109928  | 204554_at   | protein phosphatase 1, regulatory (inhibitor) subunit 3D                               | -         | -      | -  |
| 5.7 | AZU1      | NM_001700 | 214575_s_at | Azurocidin 1                                                                           | Hs.72885  | 566    | 19 |
| 5.7 | GUCY1B3   | AF020340  | 211555_s_at | Guanylate cyclase 1, soluble, beta 3                                                   | Hs.77890  | 2983   | 4  |
| 5.6 | DLAT      | J03866    | 211150_s_at | dihydrolipoamide S-acetyltransferase                                                   | -         | -      | -  |
| 5.6 | PRKAR2B   | NM_002736 | 203680_at   | Protein kinase, cAMP-dependent, regulatory, type II, beta                              | Hs.433068 | 5577   | 7  |
| 5.6 | CDCA8     | BC001651  | 221520_s_at | Cell division cycle associated 8                                                       | Hs.524571 | 55143  | 1  |
| 5.5 | FCER1G    | NM_004106 | 204232_at   | Fc fragment of IgE, high affinity I, receptor for; gamma polypeptide                   | Hs.433300 | 2207   | 1  |
| 5.5 | CYP51A1   | NM_000786 | 216607_s_at | cytochrome P450, family 51, pseudogene 2                                               | -         | 83530  | -  |
| 5.5 | PLK4      | AL043646  | 204886_at   | Polo-like kinase 4 ( <i>Drosophila</i> )                                               | Hs.172052 | 10733  | 4  |
| 5.4 | ACLY      | U18197    | 210337_s_at | ATP citrate lyase                                                                      | Hs.387567 | 47     | 17 |
| 5.4 | BTK       | NM_000061 | 205504_at   | Bruton agammaglobulinemia tyrosine kinase                                              | Hs.159494 | 695    | X  |
| 5.4 | ZNF710    | AI246730  | 213542_at   | Zinc finger protein 710                                                                | Hs.459311 | 374655 | 15 |
| 5.4 | GATA1     | M30601    | 210446_at   | GATA binding protein 1 (globin transcription factor 1)                                 | Hs.765    | 2623   | X  |
| 5.4 | RAB38     | NM_022337 | 219412_at   | RAB38, member RAS oncogene family                                                      | Hs.591975 | 23682  | 11 |
| 5.3 | SLC37A1   | NM_018964 | 218928_s_at | Solute carrier family 37 (glycerol-3-phosphate transporter), member 1                  | Hs.547009 | 54020  | 21 |
| 5.2 | MED18     | BC002694  | 221650_s_at | Mediator complex subunit 18                                                            | Hs.479911 | 54797  | 1  |
| 5.2 | DNM1L     | NM_012062 | 203105_s_at | Dynamin 1-like                                                                         | Hs.556296 | 10059  | 12 |
| 5.2 | PCTP      | NM_021213 | 218676_s_at | Phosphatidylcholine transfer protein                                                   | Hs.285218 | 58488  | 17 |
| 5.2 | EXOSC4    | NM_019037 | 218695_at   | Exosome component 4                                                                    | Hs.632041 | 54512  | 8  |
| 5.2 | SELP      | NM_003005 | 206049_at   | Selectin P (granule membrane protein 140kDa, antigen CD62)                             | Hs.73800  | 6403   | 1  |
| 5.2 | WDR1      | AF274954  | 210935_s_at | WD repeat domain 1                                                                     | Hs.128548 | 9948   | 4  |
| 5.2 | FNBP1L    | AW270932  | 215017_s_at | Transcribed locus                                                                      | Hs.707310 | -      | 1  |
| 5.1 | TUBA4A    | AL565074  | 212242_at   | Tubulin, alpha 4a                                                                      | Hs.75318  | 7277   | 2  |
| 5.1 | RAB4B     | NM_016154 | 219807_x_at | RAB4B, member RAS oncogene family                                                      | Hs.631539 | 53916  | 19 |
| 5.1 | RRM2      | BC001886  | 209773_s_at | Ribonucleotide reductase M2 polypeptide                                                | Hs.226390 | 6241   | 2  |
| 5.1 | LYZ       | AV711904  | 213975_s_at | lysozyme (renal amyloidosis)                                                           | -         | -      | -  |
| 5.1 | SLCO3A1   | NM_013272 | 219229_at   | Solute carrier organic anion transporter family, member 3A1                            | Hs.311187 | 28232  | 15 |
| 5.1 | FAM171A1  | AU150943  | 212771_at   | Transcribed locus                                                                      | Hs.708191 | -      | 10 |
| 5.1 | GOLPH3L   | NM_018178 | 218361_at   | Golgi phosphoprotein 3-like                                                            | Hs.646007 | 55204  | 1  |
| 5.1 | DENND4A   | BE268538  | 214787_at   | DENN/MADD domain containing 4A                                                         | Hs.654567 | 10260  | 15 |
| 5.0 | NLK       | NM_016231 | 218318_s_at | Nemo-like kinase                                                                       | Hs.208759 | 51701  | 17 |
| 5.0 | GALNT10   | NM_017540 | 207357_s_at | UDP-N-acetyl-alpha-D-galactosamine:polypeptide N-acetylglucosaminyltransferase 10      | Hs.655011 | 55568  | 5  |
| 5.0 | FDPS      | NM_002004 | 201275_at   | Farnesyl diphosphate synthase (farnesyl pyrophosphate synthetase, dimethylallyltranstr | Hs.335918 | 2224   | 1  |
| 5.0 | SUV39H2   | NM_024670 | 219262_at   | Suppressor of variegation 3-9 homolog 2 ( <i>Drosophila</i> )                          | Hs.554883 | 79723  | 10 |
| 5.0 | ARHGEF9   | AI625739  | 203263_s_at | Cdc42 guanine nucleotide exchange factor (GEF) 9                                       | Hs.54697  | 23229  | X  |
| 5.0 | CLU       | M25915    | 208792_s_at | Clusterin                                                                              | Hs.436657 | 1191   | 8  |
| 5.0 | SC5DL     | D85181    | 211423_s_at | sterol-C5-desaturase (ERG3 delta-5-desaturase homolog, <i>S. cerevisiae</i> )-like     | -         | 6309   | -  |
| 4.9 | STOM      | M81635    | 201061_s_at | stomatin                                                                               | -         | 2040   | -  |
| 4.9 | M6PR      | AI583537  | 200900_s_at | Mannose-6-phosphate receptor (cation dependent)                                        | Hs.134084 | 4074   | 12 |
| 4.9 | PADI4     | AF229067  | 211413_s_at | Peptidyl arginine deiminase, type IV                                                   | Hs.522969 | 23569  | 1  |
| 4.9 | RG510     | AI744627  | 214000_s_at | Regulator of G-protein signaling 10                                                    | Hs.501200 | 6001   | 10 |
| 4.9 | SORT1     | BE742268  | 212797_at   | Sortilin 1                                                                             | Hs.485195 | 6272   | 1  |
| 4.9 | DPY19L1   | AB020684  | 212792_at   | Dpy-19-like 1 ( <i>C. elegans</i> )                                                    | Hs.408623 | 23333  | 7  |

## Up-Regulated Transcripts (u133A U133B)

|     |          |           |             |                                                                             |           |        |    |
|-----|----------|-----------|-------------|-----------------------------------------------------------------------------|-----------|--------|----|
| 4.9 | CCNB1    | BE407516  | 214710_s_at | Cyclin B1                                                                   | Hs.23960  | 891    | 5  |
| 4.9 | CCNA2    | AI346350  | 213226_at   | Cyclin A2                                                                   | Hs.58974  | 890    | 4  |
| 4.8 | ASPM     | NM_018123 | 219918_s_at | asp (abnormal spindle) homolog, microcephaly associated (Drosophila)        | -         | 259266 | -  |
| 4.8 | WSB2     | NM_018639 | 201760_s_at | WD repeat and SOCS box-containing 2                                         | Hs.506985 | 55884  | 12 |
| 4.8 | ISCA1    | NM_030940 | 221425_s_at | Iron-sulfur cluster assembly 1 homolog (S. cerevisiae)                      | Hs.449291 | 81689  | 9  |
| 4.8 | ZYX      | NM_003461 | 200808_s_at | Zyxin                                                                       | Hs.490415 | 7791   | 7  |
| 4.8 | ANPEP    | NM_001150 | 202888_s_at | Alanyl (membrane) aminopeptidase                                            | Hs.1239   | 290    | 15 |
| 4.8 | RUFY1    | NM_025158 | 218243_at   | RUN and FYVE domain containing 1                                            | Hs.306769 | 80230  | 5  |
| 4.8 | CENPA    | NM_001809 | 204962_s_at | Centromere protein A                                                        | Hs.1594   | 1058   | 2  |
| 4.8 | THBD     | NM_000361 | 203888_at   | Thrombomodulin                                                              | Hs.2030   | 7056   | 20 |
| 4.8 | KIF2A    | NM_004520 | 203087_s_at | Kinesin heavy chain member 2A                                               | Hs.558351 | 3796   | 5  |
| 4.7 | RPL12    | AK026491  | 200088_x_at | ribosomal protein L12                                                       |           |        |    |
| 4.7 | RECQL    | NM_002907 | 205091_x_at | RecQ protein-like (DNA helicase Q1-like)                                    | Hs.235069 | 5965   | 12 |
| 4.7 | FADD     | NM_003824 | 202535_at   | Fas (TNFRSF6)-associated via death domain                                   | Hs.86131  | 8772   | 11 |
| 4.7 | PLA2G4A  | M68874    | 210145_at   | Phospholipase A2, group IVA (cytosolic, calcium-dependent)                  | Hs.497200 | 5321   | 1  |
| 4.7 | USP18    | NM_017414 | 219211_at   | Ubiquitin specific peptidase 18                                             | Hs.38260  | 11274  | 22 |
| 4.7 | SLC33A1  | NM_004733 | 203165_s_at | Solute carrier family 33 (acetyl-CoA transporter), member 1                 | Hs.478031 | 9197   | 3  |
| 4.7 | TMSB15A  | NM_021992 | 205347_s_at | Thymosin beta 15a                                                           | Hs.56145  | 11013  | X  |
| 4.7 | PION     | AK026747  | 222150_s_at | Pigeon homolog (Drosophila)                                                 | Hs.186649 | 54103  | 7  |
| 4.7 | LZHGDDH  | NM_024884 | 220089_at   | L-2-hydroxyglutarate dehydrogenase                                          | Hs.256034 | 79944  | 14 |
| 4.7 | FAM98A   | AL049943  | 212333_at   | Family with sequence similarity 98, member A                                | Hs.468140 | 25940  | 2  |
| 4.7 | MGAT2    | NM_002408 | 203102_s_at | Mannosyl (alpha-1,6-)-glycoprotein beta-1,2-N-acetylglucosaminyltransferase | Hs.93338  | 4247   | 14 |
| 4.7 | TPM1     | Z24727    | 210986_s_at | Tropomyosin 1 (alpha)                                                       | Hs.133892 | 7168   | 15 |
| 4.7 | KIF18A   | NM_031217 | 221258_s_at | Kinesin family member 18A                                                   | Hs.301052 | 81930  | 11 |
| 4.6 | C18orf1  | NM_004338 | 207996_s_at | Chromosome 18 open reading frame 1                                          | Hs.149363 | 753    | 18 |
| 4.6 | FGR      | NM_005248 | 208438_s_at | Gardner-Rasheed feline sarcoma viral (v-fgr) oncogene homolog               | Hs.1422   | 2268   | 1  |
| 4.6 | FAR2     | NM_018099 | 220615_s_at | Fatty acyl CoA reductase 2                                                  | Hs.719237 | 55711  | 12 |
| 4.6 | DIAPH1   | AF051782  | 209190_s_at | Diaphanous homolog 1 (Drosophila)                                           | Hs.529451 | 1729   | 5  |
| 4.6 | FYN      | M14333    | 210105_s_at | FYN oncogene related to SRC, FGR, YES                                       | Hs.390567 | 2534   | 6  |
| 4.6 | VEGFC    | U58111    | 209946_at   | Vascular endothelial growth factor C                                        | Hs.435215 | 7424   | 4  |
| 4.6 | NDUFB7   | M33374    | 211407_at   | NADH dehydrogenase (ubiquinone) 1 beta subcomplex, 7, 18kDa                 | -         | 4713   | -  |
| 4.6 | TYROBP   | NM_003332 | 204122_at   | TYRO protein tyrosine kinase binding protein                                | Hs.515369 | 7305   | 19 |
| 4.6 | SHCBP1   | NM_024745 | 219493_at   | SHC SH2-domain binding protein 1                                            | Hs.123253 | 79801  | 16 |
| 4.6 | MAX      | M64240    | 210734_x_at | MYC associated factor X                                                     | Hs.285354 | 4149   | 14 |
| 4.5 | ATMIN    | NM_015251 | 201855_s_at | ATM interactor                                                              | Hs.16349  | 23300  | 16 |
| 4.5 | RTN2     | NM_005619 | 204217_s_at | Reticulon 2                                                                 | Hs.47517  | 6253   | 19 |
| 4.5 | CD40     | BF664114  | 215346_at   | CD40 molecule, TNF receptor superfamily member 5                            | -         | -      | -  |
| 4.5 | CTSA     | NM_000308 | 200661_at   | Cathepsin A                                                                 | Hs.609336 | 5476   | 20 |
| 4.5 | SOS1     | AA700167  | 212780_at   | Son of sevenless homolog 1 (Drosophila)                                     | Hs.709893 | 6654   | 2  |
| 4.5 | CORO1C   | BC002342  | 221676_s_at | Coronin, actin binding protein, 1C                                          | Hs.330384 | 23603  | 12 |
| 4.5 | PDHB     | AL117618  | 211023_at   | Pyruvate dehydrogenase (lipoamide) beta                                     | Hs.161357 | 5162   | 3  |
| 4.5 | GSTZ1    | BC001453  | 209531_at   | Glutathione transferase zeta 1                                              | Hs.655292 | 2954   | 14 |
| 4.5 | TIMP1    | NM_003254 | 201666_at   | TIMP metalloproteinase inhibitor 1                                          | Hs.522632 | 7076   | X  |
| 4.5 | ATP6V0E1 | AI862255  | 200096_s_at | ATPase, H+ transporting, lysosomal 9kDa, V0 subunit e1                      | Hs.484188 | 8992   | 5  |
| 4.5 | BET1     | BC000899  | 202710_at   | Blocked early in transport 1 homolog (S. cerevisiae)                        | Hs.489132 | 10282  | 7  |
| 4.5 | ILK      | NM_004517 | 201234_at   | Integrin-linked kinase                                                      | Hs.706355 | 3611   | 11 |
| 4.5 | GSN      | BE675337  | 214040_s_at | Gelsolin (amyloidosis, Finnish type)                                        | Hs.522373 | 2934   | 9  |
| 4.5 | TMBIM1   | NM_022152 | 217730_at   | Transmembrane BAX inhibitor motif containing 1                              | Hs.591605 | 64114  | 2  |
| 4.5 | MEF2C    | AL536517  | 209200_at   | Myocyte enhancer factor 2C                                                  | Hs.653394 | 4208   | 5  |
| 4.5 | AURKA    | NM_003158 | 208079_s_at | aurora kinase A                                                             | -         | 6790   | -  |
| 4.5 | CLCN3    | AI760629  | 201734_at   | Transcribed locus                                                           | Hs.670607 | -      | 4  |
| 4.5 | TREML2   | NM_024807 | 219748_at   | Triggering receptor expressed on myeloid cells-like 2                       | Hs.164777 | 79865  | 6  |
| 4.4 | ACSL3    | NM_004457 | 201661_s_at | Acyl-CoA synthetase long-chain family member 3                              | Hs.655722 | 2181   | 2  |
| 4.4 | VASP     | NM_003370 | 202205_at   | Vasodilator-stimulated phosphoprotein                                       | Hs.515469 | 7408   | 19 |
| 4.4 | C17orf72 | AA126728  | 213620_s_at | Chromosome 17 open reading frame 72                                         | Hs.708161 | 92340  | 17 |
| 4.4 | CPOX     | NM_000097 | 204172_at   | Coproporphyrinogen oxidase                                                  | Hs.476982 | 1371   | 3  |
| 4.4 | FDFT1    | BC003573  | 210950_s_at | Farnesyl-diphosphate farnesyltransferase 1                                  | Hs.593928 | 2222   | 8  |

## Up-Regulated Transcripts (u133A U133B)

|     |            |           |             |                                                                                             |           |           |    |
|-----|------------|-----------|-------------|---------------------------------------------------------------------------------------------|-----------|-----------|----|
| 4.4 | LIMS1      | AL110164  | 212687_at   | LIM and senescent cell antigen-like domains 1                                               | Hs.597715 | 3987      | 2  |
| 4.4 | APBA2      | AW571582  | 209870_s_at | Amyloid beta (A4) precursor protein-binding, family A, member 2                             | Hs.618112 | 321       | 15 |
| 4.4 | SLC2A3P1   | AL565516  | 221751_at   | Solute carrier family 2 (facilitated glucose transporter), member 3 pseudogene 1            | Hs.388400 | 100128062 | 5  |
| 4.4 | APOB48R    | NM_018690 | 220023_at   | Apolipoprotein B48 receptor                                                                 | Hs.200333 | 55911     | 16 |
| 4.3 | IVNS1ABP   | AB020657  | 201363_s_at | Influenza virus NS1A binding protein                                                        | Hs.497183 | 10625     | 1  |
| 4.3 | SNX4       | NM_003794 | 205329_s_at | Sorting nexin 4                                                                             | Hs.507243 | 8723      | 3  |
| 4.3 | STXBP2     | AB002559  | 209367_at   | Syntaxin binding protein 2                                                                  | Hs.515104 | 6813      | 19 |
| 4.3 | B3GALT4    | AB026730  | 210205_at   | UDP-Gal:betaGlcNAc beta 1,3-galactosyltransferase, polypeptide 4                            | Hs.534375 | 8705      | 6  |
| 4.3 | SH3BGRL3   | NM_031286 | 221269_s_at | SH3 domain binding glutamic acid-rich protein like 3                                        | Hs.109051 | 83442     | 1  |
| 4.3 | GOLT1B     | NM_016072 | 218193_s_at | Golgi transport 1 homolog B (S. cerevisiae)                                                 | Hs.62275  | 51026     | 12 |
| 4.3 | ACTR3      | Z78330    | 213102_at   | ARP3 actin-related protein 3 homolog (yeast)                                                | Hs.433512 | 10096     | 2  |
| 4.3 | ELOVL6     | NM_024090 | 204256_at   | ELOVL family member 6, elongation of long chain fatty acids (FEN1/Elo2, SUR4/Elo3-like)     | Hs.412939 | 79071     | 4  |
| 4.2 | TAL1       | NM_003189 | 206283_s_at | T-cell acute lymphocytic leukemia 1                                                         | Hs.709194 | 6886      | 1  |
| 4.2 | PAFAH1B1   | NM_000430 | 200816_s_at | Platelet-activating factor acetylhydrolase, isoform Ib, subunit 1 (45kDa)                   | Hs.77318  | 5048      | 17 |
| 4.2 | TTC27      | NM_017735 | 218710_at   | Tetratricopeptide repeat domain 27                                                          | Hs.468125 | 55622     | 2  |
| 4.2 | NCF4       | NM_013416 | 207677_s_at | Neutrophil cytosolic factor 4, 40kDa                                                        | Hs.474781 | 4689      | 22 |
| 4.2 | PRKAR1A    | NM_002734 | 200605_s_at | Protein kinase, cAMP-dependent, regulatory, type I, alpha (tissue specific extinguisher 1)  | Hs.280342 | 5573      | 17 |
| 4.2 | APOBEC3B   | NM_004900 | 206632_s_at | Apolipoprotein B mRNA editing enzyme, catalytic polypeptide-like 3B                         | Hs.226307 | 9582      | 22 |
| 4.2 | PDLIM1     | BC000915  | 208690_s_at | PDZ and LIM domain 1                                                                        | Hs.368525 | 9124      | 10 |
| 4.2 | COLQ       | AF057036  | 206073_at   | Collagen-like tail subunit (single strand of homotrimer) of asymmetric acetylcholinesterase | Hs.146735 | 8292      | 3  |
| 4.2 | RFC5       | BG260658  | 213734_at   | Replication factor C (activator 1) 5, 36.5kDa                                               | Hs.506989 | 5985      | 12 |
| 4.2 | AK1        | BC001116  | 202587_s_at | Adenylate kinase 1                                                                          | Hs.175473 | 203       | 9  |
| 4.2 | GEMIN4     | NM_015487 | 205527_s_at | gem (nuclear organelle) associated protein 4                                                | -         | 50628     | -  |
| 4.2 | KIAA0746   | AB018289  | 212314_at   | KIAA0746 protein                                                                            | Hs.479384 | 23231     | 4  |
| 4.2 | GCNT1      | NM_001490 | 205505_at   | Glucosaminyl (N-acetyl) transferase 1, core 2 (beta-1,6-N-acetylglucosaminyltransferase)    | Hs.521568 | 2650      | 9  |
| 4.2 | TADA3L     | AK024982  | 215273_s_at | Transcriptional adaptor 3 (NGG1 homolog, yeast)-like                                        | Hs.386390 | 10474     | 3  |
| 4.2 | C11orf17   | NM_020642 | 219953_s_at | Chromosome 11 open reading frame 17                                                         | Hs.131180 | 56672     | 11 |
| 4.2 | CLIC4      | NM_013943 | 201560_at   | Chloride intracellular channel 4                                                            | Hs.440544 | 25932     | 1  |
| 4.2 | PSTPIP2    | NM_024430 | 219938_s_at | Proline-serine-threonine phosphatase interacting protein 2                                  | Hs.567384 | 9050      | 18 |
| 4.1 | WRB        | NM_004627 | 202749_at   | Tryptophan rich basic protein                                                               | Hs.198308 | 7485      | 21 |
| 4.1 | TBPL1      | NM_004865 | 208398_s_at | TBP-like 1                                                                                  | Hs.486507 | 9519      | 6  |
| 4.1 | CAP1       | NM_006367 | 200625_s_at | CAP, adenylate cyclase-associated protein 1 (yeast)                                         | Hs.370581 | 10487     | 1  |
| 4.1 | C1orf103   | NM_018372 | 220235_s_at | Chromosome 1 open reading frame 103                                                         | Hs.25245  | 55791     | 1  |
| 4.1 | ARFGAP3    | NM_007229 | 201651_s_at | ADP-ribosylation factor GTPase activating protein 3                                         | Hs.162877 | 26286     | 22 |
| 4.1 | CD84       | NM_003874 | 205988_at   | CD84 molecule                                                                               | Hs.398093 | 8832      | 1  |
| 4.1 | MLLT11     | BC006471  | 211071_s_at | Myeloid/lymphoid or mixed-lineage leukemia (trithorax homolog, Drosophila); transloc        | Hs.75823  | 10962     | 1  |
| 4.1 | CTSC       | NM_001814 | 201487_at   | Cathepsin C                                                                                 | Hs.128065 | 1075      | 11 |
| 4.1 | BATF/FLCR2 | AC007182  | 217188_s_at | chromosome 14 open reading frame 1                                                          | -         | -         | -  |
| 4.1 | PEX3       | AB035307  | 203972_s_at | Peroxisomal biogenesis factor 3                                                             | Hs.7277   | 8504      | 6  |
| 4.1 | FMR1       | AA830884  | 215245_x_at | Fragile X mental retardation 1                                                              | Hs.103183 | 2332      | X  |
| 4.0 | TMEM104    | NM_017728 | 220097_s_at | Transmembrane protein 104                                                                   | Hs.370262 | 54868     | 17 |
| 4.0 | CCND3      | NM_001760 | 201700_at   | Cyclin D3                                                                                   | Hs.534307 | 896       | 6  |
| 4.0 | PRKACB     | NM_002731 | 202742_s_at | Protein kinase, cAMP-dependent, catalytic, beta                                             | Hs.487325 | 5567      | 1  |
| 4.0 | MBD1       | NM_015845 | 208595_s_at | Methyl-CpG binding domain protein 1                                                         | Hs.405610 | 4152      | 18 |
| 4.0 | DNAJB6     | BC002446  | 209015_s_at | Dnaj (Hsp40) homolog, subfamily B, member 6                                                 | Hs.719116 | 10049     | 7  |
| 4.0 | CLPB       | AI655698  | 221845_s_at | ClpB caseinolytic peptidase B homolog (E. coli)                                             | Hs.523877 | 81570     | 11 |
| 4.0 | CSF2RB     | AV756141  | 205159_at   | Colony stimulating factor 2 receptor, beta, low-affinity (granulocyte-macrophage)           | Hs.592192 | 1439      | 22 |
| 3.9 | RPL28      | NM_000991 | 200003_s_at | Ribosomal protein L28                                                                       |           |           |    |
| 3.9 | DAPP1      | NM_014395 | 219290_x_at | Dual adaptor of phosphotyrosine and 3-phosphoinositides                                     | Hs.436271 | 27071     | 4  |
| 3.9 | SEC23B     | BC005032  | 210293_s_at | Sec23 homolog B (S. cerevisiae)                                                             | Hs.369373 | 10483     | 20 |
| 3.9 | NSDHL      | BC000245  | 209279_s_at | NAD(P) dependent steroid dehydrogenase-like                                                 | Hs.57698  | 50814     | X  |
| 3.9 | FUT8       | NM_004480 | 203988_s_at | Fucosyltransferase 8 (alpha 1,6 fucosyltransferase)                                         | Hs.654961 | 2530      | 14 |
| 3.9 | C3AR1      | U62027    | 209906_at   | Complement component 3a receptor 1                                                          | Hs.591148 | 719       | 12 |
| 3.9 | HERC4      | NM_015601 | 208055_s_at | Hect domain and RLD 4                                                                       | Hs.51891  | 26091     | 10 |
| 3.9 | SLC48A1    | NM_017842 | 218417_s_at | Solute carrier family 48 (heme transporter), member 1                                       | Hs.438867 | 55652     | 12 |
| 3.9 | C10orf26   | AK000161  | 202808_at   | Chromosome 10 open reading frame 26                                                         | Hs.500897 | 54838     | 10 |
| 3.9 | SKAP2      | AB014486  | 204361_s_at | Src kinase associated phosphoprotein 2                                                      | Hs.200770 | 8935      | 7  |

## Up-Regulated Transcripts (u133A U133B)

|     |          |           |             |                                                                                   |           |       |    |
|-----|----------|-----------|-------------|-----------------------------------------------------------------------------------|-----------|-------|----|
| 3.8 | PTPN12   | NM_002835 | 202006_at   | Protein tyrosine phosphatase, non-receptor type 12                                | Hs.61812  | 5782  | 7  |
| 3.8 | E2F      | NM_001952 | 203957_at   | E2F transcription factor 6                                                        | -         | 1876  | -  |
| 3.8 | LRRC8B   | AU146004  | 212978_at   | Leucine rich repeat containing 8 family, member B                                 | Hs.482017 | 23507 | 1  |
| 3.8 | ICAM2    | NM_000873 | 204683_at   | Intercellular adhesion molecule 2                                                 | Hs.431460 | 3384  | 17 |
| 3.8 | RIT1     | AF084462  | 209882_at   | Ras-like without CAAX 1                                                           | Hs.491234 | 6016  | 1  |
| 3.8 | LCP2     | AI123251  | 205269_at   | Lymphocyte cytosolic protein 2 (SH2 domain containing leukocyte protein of 76kDa) | Hs.304475 | 3937  | 5  |
| 3.8 | SRGAP2   | AA742261  | 213329_at   | SLIT-ROBO Rho GTPase activating protein 2                                         | Hs.497575 | 23380 | 1  |
| 3.8 | ANP32A   | NM_006305 | 201043_s_at | Acidic (leucine-rich) nuclear phosphoprotein 32 family, member A                  | Hs.458747 | 8125  | 15 |
| 3.8 | REEP5    | BC000232  | 208873_s_at | Receptor accessory protein 5                                                      | Hs.429608 | 7905  | 5  |
| 3.8 | SPARC    | NM_003118 | 200665_s_at | Secreted protein, acidic, cysteine-rich (osteonectin)                             | Hs.111779 | 6678  | 5  |
| 3.8 | ATP2A3   | NM_005173 | 207522_s_at | ATPase, Ca <sup>++</sup> transporting, ubiquitous                                 | Hs.513870 | 489   | 17 |
| 3.8 | CCDC90A  | NM_022102 | 220094_s_at | coiled-coil domain containing 90A                                                 | -         | 63933 | -  |
| 3.8 | RNGTT    | NM_003800 | 204208_at   | RNA guanylyltransferase and 5'-phosphatase                                        | Hs.567378 | 8732  | 6  |
| 3.8 | PTK2     | AL037339  | 208820_at   | PTK2 protein tyrosine kinase 2                                                    | Hs.395482 | 5747  | 8  |
| 3.7 | SLC35A5  | NM_017945 | 218519_at   | Solute carrier family 35, member A5                                               | Hs.237440 | 55032 | 3  |
| 3.7 | TXNDC9   | NM_005783 | 203008_x_at | Thioredoxin domain containing 9                                                   | Hs.536122 | 10190 | 2  |
| 3.7 | ADRA2A   | AF284095  | 209869_at   | Adrenergic, alpha-2A-, receptor                                                   | Hs.249159 | 150   | 10 |
| 3.7 | COX17    | NM_005694 | 203880_at   | COX17 cytochrome c oxidase assembly homolog ( <i>S. cerevisiae</i> )              | Hs.534383 | 10063 | 3  |
| 3.7 | WFDC1    | NM_021197 | 219478_at   | WAP four-disulfide core domain 1                                                  | Hs.36688  | 58189 | 16 |
| 3.7 | PPIC     | NM_000943 | 204518_s_at | Peptidylprolyl isomerase C (cyclophilin C)                                        | Hs.110364 | 5480  | 5  |
| 3.7 | HPCAL1   | NM_002149 | 205462_s_at | Hippocalcin-like 1                                                                | Hs.580427 | 3241  | 2  |
| 3.7 | VEGFA    | AF022375  | 210512_s_at | Vascular endothelial growth factor A                                              | Hs.73793  | 7422  | 6  |
| 3.7 | LAMTOR1  | BC001706  | 223009_at   | Chromosome 11 open reading frame 59                                               |           |       |    |
| 3.7 | RAP1B    | NM_015646 | 200833_s_at | RAP1B, member of RAS oncogene family                                              | Hs.369920 | 5908  | 12 |
| 3.7 | FAM3C    | NM_014888 | 201889_at   | Family with sequence similarity 3, member C                                       | Hs.434053 | 10447 | 7  |
| 3.7 | NPTN     | NM_017455 | 202228_s_at | Neuroplastin                                                                      | Hs.187866 | 27020 | 15 |
| 3.7 | GPR137B  | NM_003272 | 204137_at   | G protein-coupled receptor 137B                                                   | Hs.498160 | 7107  | 1  |
| 3.7 | INSIG2   | AL080184  | 209566_at   | Insulin induced gene 2                                                            | Hs.7089   | 51141 | 2  |
| 3.6 | -        | AK021614  | 215753_at   | CDNA FLJ11552 fis, clone HEMBA1003021                                             | Hs.635391 | -     | 19 |
| 3.6 | VWASA    | BC001234  | 210102_at   | Von Willebrand factor A domain containing 5A                                      | Hs.152944 | 4013  | 11 |
| 3.6 | GAS5     | BG329175  | 224741_x_at | Centromere protein L                                                              |           |       |    |
| 3.6 | MKI67    | BF001806  | 212022_s_at | Antigen identified by monoclonal antibody Ki-67                                   | Hs.80976  | 4288  | 10 |
| 3.6 | MTHFD2L  | NM_025001 | 220346_at   | methylenetetrahydrofolate dehydrogenase (NADP+ dependent) 2-like                  | -         | -     | -  |
| 3.6 | S100A4   | NM_002961 | 203186_s_at | S100 calcium binding protein A4                                                   | Hs.654444 | 6275  | 1  |
| 3.6 | ABCC4    | AI948503  | 203196_at   | ATP-binding cassette, sub-family C (CFTR/MRP), member 4                           | Hs.508423 | 10257 | 13 |
| 3.6 | CALML4   | AA886335  | 221879_at   | Calmodulin-like 4                                                                 | Hs.709550 | 91860 | 15 |
| 3.6 | PSAT1    | NM_021154 | 220892_s_at | Phosphoserine aminotransferase 1                                                  | Hs.494261 | 29968 | 9  |
| 3.6 | SSR1     | AI016620  | 200889_s_at | Signal sequence receptor, alpha                                                   | Hs.114033 | 6745  | 6  |
| 3.6 | CDC20    | NM_001255 | 202870_s_at | Cell division cycle 20 homolog ( <i>S. cerevisiae</i> )                           | Hs.524947 | 991   | 1  |
| 3.6 | TNIK     | N25621    | 213109_at   | TRAF2 and NCK interacting kinase                                                  | Hs.34024  | 23043 | 3  |
| 3.5 | NQO2     | NM_000904 | 203814_s_at | NAD(P)H dehydrogenase, quinone 2                                                  | Hs.533050 | 4835  | 6  |
| 3.5 | INPP5A   | NM_005539 | 203006_at   | Inositol polyphosphate-5-phosphatase, 40kDa                                       | Hs.523360 | 3632  | 10 |
| 3.5 | SLC25A1  | U25147    | 210010_s_at | Solute carrier family 25 (mitochondrial carrier; citrate transporter), member 1   | Hs.719167 | 6576  | 22 |
| 3.5 | MFSD1    | NM_022736 | 218109_s_at | Major facilitator superfamily domain containing 1                                 | Hs.58663  | 64747 | 3  |
| 3.5 | EDEM3    | NM_025191 | 220926_s_at | ER degradation enhancer, mannosidase alpha-like 3                                 | Hs.523811 | 80267 | 1  |
| 3.5 | LRP8     | NM_004631 | 205282_at   | Low density lipoprotein receptor-related protein 8, apolipoprotein e receptor     | Hs.719248 | 7804  | 1  |
| 3.5 | POLR3K   | NM_016310 | 218866_s_at | Polymerase (RNA) III (DNA directed) polypeptide K, 12.3 kDa                       | Hs.632223 | 51728 | 16 |
| 3.5 | PKM2     | NM_002654 | 201251_at   | Pyruvate kinase, muscle                                                           | Hs.534770 | 5315  | 15 |
| 3.5 | EBP      | AV702405  | 213787_s_at | Emopamil binding protein (sterol isomerase)                                       | Hs.30619  | 10682 | X  |
| 3.5 | STAB1    | NM_015136 | 204150_at   | Stabilin 1                                                                        | Hs.301989 | 23166 | 3  |
| 3.5 | NFE2     | L13974    | 209930_s_at | Nuclear factor (erythroid-derived 2), 45kDa                                       | Hs.75643  | 4778  | 12 |
| 3.5 | CDC2L6   | AY028424  | 211706_s_at | Cell division cycle 2-like 6 (CDK8-like)                                          | Hs.719138 | 23097 | 6  |
| 3.5 | C5orf4   | H93077    | 48031_r_at  | Chromosome 5 open reading frame 4                                                 | Hs.519694 | 10826 | 5  |
| 3.5 | C14orf1  | AL136658  | 202562_s_at | Chromosome 14 open reading frame 1                                                | Hs.15106  | 11161 | 14 |
| 3.5 | ARHGAP19 | AV717623  | 212738_at   | Rho GTPase activating protein 19                                                  | Hs.80305  | 84986 | 10 |
| 3.5 | EIF4G3   | AI768122  | 201935_s_at | Eukaryotic translation initiation factor 4 gamma, 3                               | Hs.467084 | 8672  | 1  |
| 3.4 | FHL2     | NM_001450 | 202949_s_at | Four and a half LIM domains 2                                                     | Hs.443687 | 2274  | 2  |

## Up-Regulated Transcripts (u133A U133B)

|     |             |           |             |                                                                                                    |           |           |    |
|-----|-------------|-----------|-------------|----------------------------------------------------------------------------------------------------|-----------|-----------|----|
| 3.4 | HSPA13      | AI718418  | 202557_at   | Heat shock protein 70kDa family, member 13                                                         | Hs.352341 | 6782      | 21 |
| 3.4 | DHX29       | AL079292  | 212648_at   | DEAH (Asp-Glu-Ala-His) box polypeptide 29                                                          | Hs.719180 | 54505     | 5  |
| 3.4 | GPR172A     | AK021918  | 222155_s_at | G protein-coupled receptor 172A                                                                    | Hs.6459   | 79581     | 8  |
| 3.4 | MFAP3L      | BE222709  | 213123_at   | microfibrillar-associated protein 3                                                                | -         | -         | -  |
| 3.4 | NEK2        | NM_002497 | 204641_at   | NIMA (never in mitosis gene a)-related kinase 2                                                    | Hs.153704 | 4751      | 1  |
| 3.4 | GNAZ        | NM_002073 | 204993_at   | Guanine nucleotide binding protein (G protein), alpha z polypeptide                                | Hs.584760 | 2781      | 22 |
| 3.4 | MDM1        | AW664850  | 213761_at   | Mdm1 nuclear protein homolog (mouse)                                                               | Hs.655702 | 56890     | 12 |
| 3.4 | TM9SF2      | NM_004800 | 201078_at   | Transmembrane 9 superfamily member 2                                                               | Hs.654824 | 9375      | 13 |
| 3.4 | HSPC159     | AK025603  | 226188_at   | Galectin-related protein                                                                           |           |           |    |
| 3.4 | CMTM6       | NM_017801 | 217947_at   | CKLF-like MARVEL transmembrane domain containing 6                                                 | Hs.380627 | 54918     | 3  |
| 3.4 | MYC         | NM_002467 | 202431_s_at | C-myc-P64 mRNA, initiating from promoter P0, (HLmyc3.1) partial cds                                | Hs.202453 | 100130526 | 8  |
| 3.4 | RPL7AP50    | AJ224080  | 234873_x_at | ribosomal protein L7a pseudogene 50                                                                |           |           |    |
| 3.4 | UBE2K       | NM_005339 | 202346_at   | Ubiquitin-conjugating enzyme E2K (UBC1 homolog, yeast)                                             | Hs.714332 | 3093      | 4  |
| 3.4 | CETN3       | BC005383  | 209662_at   | Centrin, EF-hand protein, 3 (CDC31 homolog, yeast)                                                 | Hs.591767 | 1070      | 5  |
| 3.4 | ZCCHC6      | NM_024617 | 220933_s_at | Zinc finger, CCHC domain containing 6                                                              | Hs.655162 | 79670     | 9  |
| 3.4 | PDE6B       | BC000249  | 210304_at   | Phosphodiesterase 6B, cGMP-specific, rod, beta                                                     | Hs.654544 | 5158      | 4  |
| 3.4 | FLI1        | M93255    | 210786_s_at | Friend leukemia virus integration 1                                                                | Hs.504281 | 2313      | 11 |
| 3.3 | SUCLA2      | NM_003850 | 202930_s_at | Succinate-CoA ligase, ADP-forming, beta subunit                                                    | Hs.546323 | 8803      | 13 |
| 3.3 | FMO5        | NM_001461 | 205776_at   | Flavin containing monooxygenase 5                                                                  | Hs.642706 | 2330      | 1  |
| 3.3 | RACGAP1     | AU153848  | 222077_s_at | Rac GTPase activating protein 1                                                                    | Hs.505469 | 29127     | 12 |
| 3.3 | CKAP2       | NM_018204 | 218252_at   | Cytoskeleton associated protein 2                                                                  | Hs.444028 | 26586     | 13 |
| 3.3 | BUB3        | AF047473  | 209974_s_at | Budding uninhibited by benzimidazoles 3 homolog (yeast)                                            | Hs.418533 | 9184      | 10 |
| 3.3 | AACS        | NM_023928 | 218434_s_at | Acetoacetyl-CoA synthetase                                                                         | Hs.656073 | 65985     | 12 |
| 3.3 | MRPL17      | AK026857  | 222216_s_at | Mitochondrial ribosomal protein L17                                                                | Hs.696199 | 63875     | 11 |
| 3.3 | UBL4A       | BE543027  | 221746_at   | Ubiquitin-like 4A                                                                                  | Hs.76480  | 8266      | X  |
| 3.3 | PBK         | NM_018492 | 219148_at   | PDZ binding kinase                                                                                 | Hs.104741 | 55872     | 8  |
| 3.3 | NDC80       | NM_006101 | 204162_at   | NDC80 homolog, kinetochore complex component ( <i>S. cerevisiae</i> )                              | Hs.414407 | 10403     | 18 |
| 3.3 | BUB1B       | NM_001211 | 203755_at   | Budding uninhibited by benzimidazoles 1 homolog beta (yeast)                                       | Hs.631699 | 701       | 15 |
| 3.3 | MFAP3L      | BC001279  | 210492_at   | Microfibrillar-associated protein 3-like                                                           | Hs.593942 | 9848      | 4  |
| 3.3 | DBI         | NM_020548 | 202428_x_at | Diazepam binding inhibitor (GABA receptor modulator, acyl-Coenzyme A binding protein)              | Hs.78888  | 1622      | 2  |
| 3.3 | SART3       | D63879    | 209128_s_at | Squamous cell carcinoma antigen recognized by T cells 3                                            | Hs.584842 | 9733      | 12 |
| 3.3 | CDC73       | NM_024529 | 218578_at   | Cell division cycle 73, Paf1/RNA polymerase II complex component, homolog ( <i>S. cerevisiae</i> ) | Hs.576497 | 79577     | 1  |
| 3.3 | DSCR3       | NM_006052 | 203635_at   | Down syndrome critical region gene 3                                                               | Hs.369488 | 10311     | 21 |
| 3.3 | C1orf25     | NM_030934 | 220992_s_at | Chromosome 1 open reading frame 25                                                                 | Hs.107149 | 81627     | 1  |
| 3.3 | MOBK13      | AF151853  | 202918_s_at | MOB1, Mps One Binder kinase activator-like 3 (yeast)                                               | Hs.645458 | 25843     | 2  |
| 3.3 | RECK        | NM_021111 | 205407_at   | Reversion-inducing-cysteine-rich protein with kazal motifs                                         | Hs.388918 | 8434      | 9  |
| 3.3 | ATP6V1E1    | BC004443  | 208678_at   | ATPase, H+ transporting, lysosomal 31kDa, V1 subunit E1                                            | Hs.517338 | 529       | 22 |
| 3.3 | ZWINT       | NM_007057 | 204026_s_at | ZW10 interactor                                                                                    | Hs.591363 | 11130     | 10 |
| 3.3 | PCDHA6      | AF152483  | 211838_x_at | Protocadherin alpha 6                                                                              | Hs.199343 | 56142     | 5  |
| 3.3 | PCMT1       | NM_005389 | 205202_at   | Protein-L-isoaspartate (D-aspartate) O-methyltransferase                                           | Hs.279257 | 5110      | 6  |
| 3.3 | CD96        | NM_005816 | 206761_at   | CD96 molecule                                                                                      | Hs.142023 | 10225     | 3  |
| 3.3 | YIPF6       | AL117461  | 212343_at   | Yip1 domain family, member 6                                                                       | Hs.82719  | 286451    | X  |
| 3.3 | UNC50       | NM_014044 | 203583_at   | Unc-50 homolog ( <i>C. elegans</i> )                                                               | Hs.13370  | 25972     | 2  |
| 3.2 | VASH1       | NM_014909 | 203940_s_at | Vasohibin 1                                                                                        | Hs.525479 | 22846     | 14 |
| 3.2 | MAP3K5      | D84476    | 203836_s_at | Mitogen-activated protein kinase kinase kinase 5                                                   | Hs.186486 | 4217      | 6  |
| 3.2 | ATP6V1D     | AF077614  | 208898_at   | ATPase, H+ transporting, lysosomal 34kDa, V1 subunit D                                             | Hs.272630 | 51382     | 14 |
| 3.2 | LRRFIP2     | NM_017724 | 218364_at   | Leucine rich repeat (in FLII) interacting protein 2                                                | Hs.719246 | 9209      | 3  |
| 3.2 | SNX1        | AF065484  | 214531_s_at | Sorting nexin 1                                                                                    | Hs.188634 | 6642      | 15 |
| 3.2 | RBL1/SAMHD1 | AL365505  | 205296_at   | retinoblastoma-like 1 (p107)                                                                       | -         | -         | -  |
| 3.2 | PHTF2       | AL136883  | 209780_at   | Putative homeodomain transcription factor 2                                                        | Hs.203965 | 57157     | 7  |
| 3.2 | DOK1        | AF180527  | 211121_s_at | Docking protein 1, 62kDa (downstream of tyrosine kinase 1)                                         | Hs.103854 | 1796      | 2  |
| 3.2 | GOLGA2      | L06147    | 35436_at    | Golgi autoantigen, golgin subfamily a, 2                                                           | Hs.155827 | 2801      | 9  |
| 3.2 | ASNS        | NM_001673 | 205047_s_at | Asparagine synthetase                                                                              | Hs.489207 | 440       | 7  |
| 3.2 | RAB33A      | NM_004794 | 206039_at   | RAB33A, member RAS oncogene family                                                                 | Hs.654356 | 9363      | X  |
| 3.2 | ATP6V0D1    | AL566172  | 212041_at   | ATPase, H+ transporting, lysosomal 38kDa, V0 subunit d1                                            | Hs.106876 | 9114      | 16 |
| 3.2 | KIAA1279    | AB033105  | 212453_at   | KIAA1279                                                                                           | Hs.279580 | 26128     | 10 |
| 3.2 | ARHGEF3     | NM_019555 | 218501_at   | Rho guanine nucleotide exchange factor (GEF) 3                                                     | Hs.476402 | 50650     | 3  |



## Up-Regulated Transcripts (u133A U133B)

|     |              |           |             |                                                                        |           |        |    |
|-----|--------------|-----------|-------------|------------------------------------------------------------------------|-----------|--------|----|
| 3.2 | ARPC5        | AL516350  | 211963_s_at | Actin related protein 2/3 complex, subunit 5, 16kDa                    | Hs.518609 | 10092  | 1  |
| 3.2 | GTSE1        | BF305380  | 204317_at   | G-2 and S-phase expressed 1                                            | -         | -      | -  |
| 3.2 | RARS         | NM_002887 | 201330_at   | Arginyl-tRNA synthetase                                                | Hs.654907 | 5917   | 5  |
| 3.1 | PPP2CB       | NM_004156 | 201375_s_at | Protein phosphatase 2 (formerly 2A), catalytic subunit, beta isoform   | Hs.491440 | 5516   | 8  |
| 3.1 | C9orf40      | NM_017998 | 218904_s_at | Chromosome 9 open reading frame 40                                     | Hs.532296 | 55071  | 9  |
| 3.1 | DLGAP5       | NM_014750 | 203764_at   | Discs, large (Drosophila) homolog-associated protein 5                 | Hs.77695  | 9787   | 14 |
| 3.1 | CTNS         | NM_004937 | 204925_at   | Cystinosis, nephropathic                                               | Hs.187667 | 1497   | 17 |
| 3.1 | GRB10        | D86962    | 209409_at   | Growth factor receptor-bound protein 10                                | Hs.164060 | 2887   | 7  |
| 3.1 | HTR2A        | NM_000621 | 207135_at   | 5-hydroxytryptamine (serotonin) receptor 2A                            | Hs.654586 | 3356   | 13 |
| 3.1 | ANXA3        | M63310    | 209369_at   | Annexin A3                                                             | Hs.480042 | 306    | 4  |
| 3.1 | TMEM41B      | N64760    | 212622_at   | Transmembrane protein 41B                                              | Hs.594563 | 440026 | 11 |
| 3.1 | TMEM234/KPNA | AL049795  | 221912_s_at | coiled-coil domain containing 28B                                      | -         | -      | -  |
| 3.1 | FEM1B        | AI799061  | 212367_at   | Transcribed locus                                                      | Hs.592737 | -      | 15 |
| 3.1 | ARMC8        | NM_015396 | 203487_s_at | Armadillo repeat containing 8                                          | Hs.719108 | 25852  | 3  |
| 3.1 | SLC16A3      | AA853175  | 217691_x_at | Solute carrier family 16, member 3 (monocarboxylic acid transporter 4) | Hs.500761 | 9123   | 17 |
| 3.1 | TBL1X        | AV753028  | 213400_s_at | Transducin (beta)-like 1X-linked                                       | Hs.495656 | 6907   | X  |
| 3.1 | RANBP9       | NM_005493 | 202583_s_at | RAN binding protein 9                                                  | Hs.708182 | 10048  | 6  |
| 3.1 | DCP2         | AV715578  | 212919_at   | DCP2 decapping enzyme homolog (S. cerevisiae)                          | Hs.443875 | 167227 | 5  |
| 3.1 | CBARA1       | AK022697  | 216903_s_at | Calcium binding atopy-related autoantigen 1                            | Hs.524367 | 10367  | 10 |
| 3.1 | ROCK2        | AL049383  | 202762_at   | Rho-associated, coiled-coil containing protein kinase 2                | Hs.591600 | 9475   | 2  |
| 3.1 | WBP5         | NM_016303 | 217975_at   | WW domain binding protein 5                                            | Hs.533287 | 51186  | X  |
| 3.1 | TAX1BP3      | AF234997  | 209154_at   | Tax1 (human T-cell leukemia virus type I) binding protein 3            | Hs.12956  | 30851  | 17 |
| 3.1 | HS3ST1       | BF000296  | 205465_x_at | Heparan sulfate (glucosamine) 3-O-sulfotransferase 1                   | Hs.507348 | 9957   | 4  |
| 3.1 | RAB6A        | BC002510  | 210127_at   | RAB6A, member RAS oncogene family                                      | Hs.707804 | 5870   | 11 |
| 3.1 | RCAN1        | NM_004414 | 208370_s_at | Regulator of calcineurin 1                                             | Hs.282326 | 1827   | 21 |
| 3.1 | SECISBP2L    | D87445    | 212450_at   | SECIS binding protein 2-like                                           | Hs.9997   | 9728   | 15 |
| 3.1 | ID1          | BC005247  | 208881_x_at | Isopentenyl-diphosphate delta isomerase 1                              | Hs.283652 | 3422   | 10 |
| 3.1 | PCYT1B       | NM_004845 | 206751_s_at | Phosphate cytidyltransferase 1, choline, beta                          | Hs.660708 | 9468   | X  |
| 3.1 | STK38        | BE048506  | 202951_at   | Serine/threonine kinase 38                                             | Hs.409578 | 11329  | 6  |
| 3.1 | CSTF1        | L02547    | 32723_at    | Cleavage stimulation factor, 3' pre-RNA, subunit 1, 50kDa              | Hs.172865 | 1477   | 20 |
| 3.1 | MYL12A       | NM_006471 | 201318_s_at | Myosin, light chain 12A, regulatory, non-sarcomeric                    | Hs.190086 | 10627  | 18 |
| 3.1 | ZFYVE21      | NM_024071 | 219929_s_at | Zinc finger, FYVE domain containing 21                                 | Hs.592322 | 79038  | 14 |
| 3.1 | TADA2L       | BC001172  | 210537_s_at | Transcriptional adaptor 2 (ADA2 homolog, yeast)-like                   | Hs.500066 | 6871   | 17 |
| 3.0 | LHFP         | NM_005780 | 218656_s_at | Lipoma HMGIC fusion partner                                            | Hs.507798 | 10186  | 13 |
| 3.0 | ELMO2        | BC000143  | 221528_s_at | Engulfment and cell motility 2                                         | Hs.210469 | 63916  | 20 |
| 3.0 | RAB2A        | AU158062  | 208731_at   | RAB2A, member RAS oncogene family                                      | Hs.369017 | 5862   | 8  |
| 3.0 | C17orf42     | NM_024683 | 219146_at   | Chromosome 17 open reading frame 42                                    | Hs.317340 | 79736  | 17 |
| 3.0 | POP1         | D31765    | 213449_at   | Processing of precursor 1, ribonuclease P/MRP subunit (S. cerevisiae)  | Hs.252828 | 10940  | 8  |
| 3.0 | CKS1B        | NM_001826 | 201897_s_at | CDC28 protein kinase regulatory subunit 1B                             | Hs.374378 | 1163   | 1  |
| 3.0 | PLK1         | NM_005030 | 202240_at   | Polo-like kinase 1 (Drosophila)                                        | Hs.592049 | 5347   | 16 |
| 3.0 | UGT2B15      | U06641    | 216687_x_at | UDP glucuronosyltransferase 2 family, polypeptide B15                  | Hs.150207 | 7366   | 4  |
| 3.0 | CDKN3        | AF213033  | 209714_s_at | Cyclin-dependent kinase inhibitor 3                                    | Hs.84113  | 1033   | 14 |
| 3.0 | CD63         | NM_001780 | 200663_at   | CD63 molecule                                                          | Hs.445570 | 967    | 12 |
| 3.0 | CLTC         | NM_004859 | 200614_at   | Clathrin, heavy chain (Hc)                                             | Hs.491351 | 1213   | 17 |
| 3.0 | NET1         | NM_005863 | 201830_s_at | Neuroepithelial cell transforming 1                                    | Hs.25155  | 10276  | 10 |
| 3.0 | GSR          | NM_000637 | 205770_at   | Glutathione reductase                                                  | Hs.271510 | 2936   | 8  |
| 3.0 | GTPBP2       | NM_019096 | 221050_s_at | GTP binding protein 2                                                  | Hs.485449 | 54676  | 6  |
| 3.0 | COQ2         | AF091086  | 213379_at   | Coenzyme Q2 homolog, prenyltransferase (yeast)                         | Hs.144304 | 27235  | 4  |
| 3.0 | GPX1         | NM_000581 | 200736_s_at | Glutathione peroxidase 1                                               | Hs.76686  | 2876   | 3  |
| 3.0 | ZMPSTE24     | NM_005857 | 202939_at   | Zinc metalloproteinase (STE24 homolog, S. cerevisiae)                  | Hs.591501 | 10269  | 1  |
| 3.0 | CRLF3        | NM_015986 | 205474_at   | Cytokine receptor-like factor 3                                        | Hs.370168 | 51379  | 17 |
| 3.0 | RPAP3        | NM_024604 | 218842_at   | RNA polymerase II associated protein 3                                 | Hs.437855 | 79657  | 12 |
| 3.0 | SGMS1        | AI377497  | 212989_at   | Sphingomyelin synthase 1                                               | Hs.654698 | 259230 | 10 |
| 3.0 | MYH9         | AI827941  | 211926_s_at | Myosin, heavy chain 9, non-muscle                                      | Hs.474751 | 4627   | 22 |
| 3.0 | C1GALT1C1    | NM_014158 | 219283_at   | C1GALT1-specific chaperone 1                                           | -         | 29071  | -  |
| 3.0 | EIF4E        | AW268640  | 201435_s_at | Eukaryotic translation initiation factor 4E                            | Hs.249718 | 1977   | 4  |
| 3.0 | RNF34        | NM_025126 | 219035_s_at | Ring finger protein 34                                                 | Hs.292804 | 80196  | 12 |

## Up-Regulated Transcripts (u133A U133B)

|     |            |           |             |                                                                                |           |        |    |
|-----|------------|-----------|-------------|--------------------------------------------------------------------------------|-----------|--------|----|
| 3.0 | SRP54      | NM_003136 | 203605_at   | Signal recognition particle 54kDa                                              | Hs.167535 | 6729   | 14 |
| 3.0 | TBXAS1     | NM_030984 | 208130_s_at | Thromboxane A synthase 1 (platelet)                                            | Hs.520757 | 6916   | 7  |
| 3.0 | GOT1       | BC000498  | 208813_at   | Glutamic-oxaloacetic transaminase 1, soluble (aspartate aminotransferase 1)    | Hs.500756 | 2805   | 10 |
| 3.0 | DAG1       | NM_004393 | 205417_s_at | Dystroglycan 1 (dystrophin-associated glycoprotein 1)                          | Hs.76111  | 1605   | 3  |
| 3.0 | NCAPD3     | AI796581  | 212789_at   | Non-SMC condensin II complex, subunit D3                                       | Hs.438550 | 23310  | 11 |
| 3.0 | RBX1       | NM_014248 | 218117_at   | Ring-box 1                                                                     | Hs.474949 | 9978   | 22 |
| 2.9 | ECM1       | U65932    | 209365_s_at | Extracellular matrix protein 1                                                 | Hs.81071  | 1893   | 1  |
| 2.9 | TGFBR2     | D50683    | 208944_at   | transforming growth factor, beta receptor II (70/80kDa)                        | -         | -      | -  |
| 2.9 | PRKACB     | AA130247  | 202741_at   | Protein kinase, cAMP-dependent, catalytic, beta                                | Hs.487325 | 5567   | 1  |
| 2.9 | DAD1       | NM_001344 | 200046_at   | Defender against cell death 1                                                  | Hs.82890  | 1603   | 14 |
| 2.9 | ARL6IP5    | NM_006407 | 200761_s_at | ADP-ribosylation-like factor 6 interacting protein 5                           | Hs.716493 | 10550  | 3  |
| 2.9 | SPAG5      | NM_006461 | 203145_at   | Sperm associated antigen 5                                                     | Hs.514033 | 10615  | 17 |
| 2.9 | MBNL2      | BE328496  | 203640_at   | muscleblind-like 2 (Drosophila)                                                | -         | -      | -  |
| 2.9 | ORMDL2     | NM_014182 | 218556_at   | ORM1-like 2 (S. cerevisiae)                                                    | Hs.534450 | 29095  | 12 |
| 2.9 | CCNB2      | NM_004701 | 202705_at   | Cyclin B2                                                                      | Hs.194698 | 9133   | 15 |
| 2.9 | SCAMP2     | NM_005697 | 218143_s_at | Secretory carrier membrane protein 2                                           | Hs.458917 | 10066  | 15 |
| 2.9 | HSD17B4    | NM_000414 | 201413_at   | Hydroxysteroid (17-beta) dehydrogenase 4                                       | Hs.406861 | 3295   | 5  |
| 2.9 | SLC22A18   | NM_002555 | 204981_at   | Solute carrier family 22, member 18                                            | Hs.50868  | 5002   | 11 |
| 2.9 | ZNF175     | NM_007147 | 205497_at   | Zinc finger protein 175                                                        | Hs.119014 | 7728   | 19 |
| 2.9 | MIS12      | BC000229  | 221559_s_at | MIS12, MIND kinetochore complex component, homolog (yeast)                     | Hs.267194 | 79003  | 17 |
| 2.9 | VANGL1     | NM_024062 | 219330_at   | vang-like 1 (van gogh, Drosophila)                                             | -         | 81839  | -  |
| 2.9 | ARF1       | NM_004504 | 218092_s_at | ArfGAP with FG repeats 1                                                       | Hs.352962 | 3267   | 2  |
| 2.9 | RASA1      | M23612    | 210621_s_at | RAS p21 protein activator (GTPase activating protein) 1                        | Hs.664080 | 5921   | 5  |
| 2.9 | RRN3       | AL110238  | 222204_s_at | RRN3 RNA polymerase I transcription factor homolog (S. cerevisiae)             | Hs.460078 | 54700  | 16 |
| 2.9 | MRFAP111   | AL566962  | 212199_at   | Morf4 family associated protein 1-like 1                                       | Hs.593159 | 114932 | 4  |
| 2.9 | RNF14      | AB022663  | 201824_at   | Ring finger protein 14                                                         | Hs.483616 | 9604   | 5  |
| 2.9 | RNF141     | NM_016422 | 219104_at   | Ring finger protein 141                                                        | Hs.44685  | 50862  | 11 |
| 2.9 | HCCS       | AI801013  | 203745_at   | Holocytochrome c synthase (cytochrome c heme-lyase)                            | Hs.211571 | 3052   | X  |
| 2.9 | NCAPG      | NM_022346 | 218663_at   | Non-SMC condensin I complex, subunit G                                         | Hs.567567 | 64151  | 4  |
| 2.9 | PLEKH82    | AI983043  | 201410_at   | Pleckstrin homology domain containing, family B (evectins) member 2            | Hs.469944 | 55041  | 2  |
| 2.9 | BIRC5      | NM_001168 | 202095_s_at | Baculoviral IAP repeat-containing 5                                            | Hs.514527 | 332    | 17 |
| 2.9 | NCRNA00188 | AI826279  | 225065_x_at | Chromosome 17 open reading frame 45                                            |           |        |    |
| 2.9 | FKBP1B     | AF322070  | 209931_s_at | FK506 binding protein 1B, 12.6 kDa                                             | Hs.709461 | 2281   | 2  |
| 2.9 | SLC7A5     | AB018009  | 201195_s_at | Solute carrier family 7 (cationic amino acid transporter, y+ system), member 5 | Hs.513797 | 8140   | 16 |
| 2.9 | C16orf5    | NM_013399 | 218183_at   | Chromosome 16 open reading frame 5                                             | Hs.654653 | 29965  | 16 |
| 2.9 | CCDC99     | AF269167  | 221685_s_at | Coiled-coil domain containing 99                                               | Hs.368710 | 54908  | 5  |
| 2.9 | MPP1       | NM_002436 | 202974_at   | Membrane protein, palmitoylated 1, 55kDa                                       | Hs.496984 | 4354   | X  |
| 2.9 | FOXM1      | NM_021953 | 202580_x_at | Forkhead box M1                                                                | Hs.239    | 2305   | 12 |
| 2.9 | PELO       | NM_015946 | 218472_s_at | Pelota homolog (Drosophila)                                                    | Hs.644352 | 53918  | 5  |
| 2.8 | ITPKB      | NM_002221 | 203723_at   | Inositol 1,4,5-trisphosphate 3-kinase B                                        | Hs.528087 | 3707   | 1  |
| 2.8 | ASF1B      | NM_018154 | 218115_at   | ASF1 anti-silencing function 1 homolog B (S. cerevisiae)                       | Hs.26516  | 55723  | 19 |
| 2.8 | PDCD10     | BC002506  | 210907_s_at | Programmed cell death 10                                                       | Hs.478150 | 11235  | 3  |
| 2.8 | MAD2L1BP   | NM_014628 | 203094_at   | MAD2L1 binding protein                                                         | Hs.122346 | 9587   | 6  |
| 2.8 | CORO1A     | U34690    | 209083_at   | Coronin, actin binding protein, 1A                                             | Hs.415067 | 11151  | 16 |
| 2.8 | ZFAND6     | AL136598  | 221613_s_at | Zinc finger, AN1-type domain 6                                                 | Hs.719106 | 54469  | 15 |
| 2.8 | ARF4       | AL537042  | 201096_s_at | ADP-ribosylation factor 4                                                      | Hs.695943 | 378    | 3  |
| 2.8 | QKI        | AL031781  | 212636_at   | quaking homolog, KH domain RNA binding (mouse)                                 | -         | -      | -  |
| 2.8 | CLTA       | NM_001833 | 204050_s_at | Clathrin, light chain (Lca)                                                    | Hs.522114 | 1211   | 9  |
| 2.8 | GGH        | NM_003878 | 203560_at   | Gamma-glutamyl hydrolase (conjugase, folylpolyglutamylyl hydrolase)            | Hs.78619  | 8836   | 8  |
| 2.8 | PFKP       | NM_002627 | 201037_at   | Phosphofructokinase, platelet                                                  | Hs.26010  | 5214   | 10 |
| 2.8 | HMG20A     | NM_018200 | 218152_at   | High-mobility group 20A                                                        | Hs.69594  | 10363  | 15 |
| 2.8 | GLRX2      | NM_016066 | 219933_at   | Glutaredoxin 2                                                                 | Hs.458283 | 51022  | 1  |
| 2.8 | PREPL      | AW000954  | 212216_at   | Prolyl endopeptidase-like                                                      | Hs.719111 | 9581   | 2  |
| 2.8 | ATP6V1A    | AF113129  | 201972_at   | ATPase, H+ transporting, lysosomal 70kDa, V1 subunit A                         | Hs.477155 | 523    | 3  |
| 2.8 | AP2B1      | AL567295  | 200615_s_at | Adaptor-related protein complex 2, beta 1 subunit                              | Hs.514819 | 163    | 17 |
| 2.8 | RASAL2     | NM_004841 | 219026_s_at | RAS protein activator like 2                                                   | Hs.715627 | 9462   | 1  |
| 2.8 | WDR26      | NM_025160 | 218107_at   | WD repeat domain 26                                                            | Hs.497873 | 80232  | 1  |

## Up-Regulated Transcripts (u133A U133B)

|     |          |           |             |                                                                                   |           |        |    |
|-----|----------|-----------|-------------|-----------------------------------------------------------------------------------|-----------|--------|----|
| 2.8 | CD47     | Z25521    | 211075_s_at | CD47 molecule                                                                     | Hs.446414 | 961    | 3  |
| 2.8 | ACOT9    | AF241787  | 221641_s_at | Acyl-CoA thioesterase 9                                                           | Hs.298885 | 23597  | X  |
| 2.8 | TRIP12   | NM_004238 | 201546_at   | Thyroid hormone receptor interactor 12                                            | Hs.591633 | 9320   | 2  |
| 2.8 | VWF      | NM_000552 | 202112_at   | Von Willebrand factor                                                             | Hs.440848 | 7450   | 12 |
| 2.8 | SNHG6    | BG169443  | 225547_at   | Small nucleolar RNA host gene 6 (non-protein coding)                              |           |        |    |
| 2.8 | SNAP29   | NM_004782 | 218327_s_at | Synaptosomal-associated protein, 29kDa                                            | Hs.108002 | 9342   | 22 |
| 2.8 | TMPO     | AW272611  | 203432_at   | Thymopoietin                                                                      | Hs.655104 | -      | 12 |
| 2.8 | FERMT2   | Z24725    | 209210_s_at | Fermitin family homolog 2 (Drosophila)                                            | Hs.509343 | 10979  | 14 |
| 2.8 | ARPC1B   | NM_005720 | 201954_at   | Actin related protein 2/3 complex, subunit 1B, 41kDa                              | Hs.489284 | 10095  | 7  |
| 2.8 | SREBF2   | BE513151  | 201247_at   | Sterol regulatory element binding transcription factor 2                          | Hs.443258 | 6721   | 22 |
| 2.8 | FEN1     | NM_004111 | 204768_s_at | Flap structure-specific endonuclease 1                                            | Hs.409065 | 2237   | 11 |
| 2.8 | NCOR1    | ABO28970  | 200854_at   | Nuclear receptor co-repressor 1                                                   | Hs.462323 | 9611   | 17 |
| 2.8 | C5orf15  | NM_020199 | 203024_s_at | Chromosome 5 open reading frame 15                                                | Hs.716457 | 56951  | 5  |
| 2.8 | NCBP1    | BC001450  | 209520_s_at | Nuclear cap binding protein subunit 1, 80kDa                                      | Hs.595669 | 4686   | 9  |
| 2.8 | FBXW11   | BE963245  | 209455_at   | F-box and WD repeat domain containing 11                                          | Hs.484138 | 23291  | 5  |
| 2.8 | ARCN1    | NM_001655 | 201176_s_at | Archain 1                                                                         | Hs.33642  | 372    | 11 |
| 2.8 | STK39    | NM_013233 | 202786_at   | Serine threonine kinase 39 (STE20/SPS1 homolog, yeast)                            | Hs.276271 | 27347  | 2  |
| 2.7 | ALG11    | NM_021645 | 203614_at   | Asparagine-linked glycosylation 11, alpha-1,2-mannosyltransferase homolog (yeast) | Hs.512963 | 440138 | 13 |
| 2.7 | HERC2    | NM_004667 | 217902_s_at | Hect domain and RLD 2                                                             | Hs.434890 | 8924   | 15 |
| 2.7 | RAB10    | AL136650  | 222980_at   | RAB10, member RAS oncogene family                                                 |           |        |    |
| 2.7 | PLEKHF2  | NM_024613 | 218640_s_at | Pleckstrin homology domain containing, family F (with FYVE domain) member 2       | Hs.29724  | 79666  | 8  |
| 2.7 | CAPZA1   | NM_006135 | 208374_s_at | Capping protein (actin filament) muscle Z-line, alpha 1                           | Hs.514934 | 829    | 1  |
| 2.7 | C16orf88 | AI652058  | 213237_at   | Chromosome 16 open reading frame 88                                               | Hs.585209 | 400506 | 16 |
| 2.7 | VPS37C   | NM_017966 | 219053_s_at | Vacuolar protein sorting 37 homolog C (S. cerevisiae)                             | Hs.523715 | 55048  | 11 |
| 2.7 | QPRT     | NM_014298 | 204044_at   | Quinolate phosphoribosyltransferase                                               | Hs.513484 | 23475  | 16 |
| 2.7 | SELT     | NM_016275 | 217811_at   | Selenoprotein T                                                                   | Hs.369052 | 51714  | 3  |
| 2.7 | ETF A    | NM_000126 | 201931_at   | Electron-transfer-flavoprotein, alpha polypeptide                                 | Hs.39925  | 2108   | 15 |
| 2.7 | RAB4A    | BC002438  | 203581_at   | RAB4A, member RAS oncogene family                                                 | Hs.296169 | 5867   | 1  |
| 2.7 | CCNF     | U17105    | 204827_s_at | Cyclin F                                                                          | Hs.1973   | 899    | 16 |
| 2.7 | SHC1     | AI091079  | 214853_s_at | Transcribed locus                                                                 | Hs.708522 | -      | 1  |
| 2.7 | TLK1     | NM_012290 | 202606_s_at | Tousled-like kinase 1                                                             | Hs.719163 | 9874   | 2  |
| 2.7 | GSTO1    | NM_004832 | 201470_at   | Glutathione S-transferase omega 1                                                 | Hs.190028 | 9446   | 10 |
| 2.7 | RAB1A    | NM_004161 | 207791_s_at | RAB1A, member RAS oncogene family                                                 | Hs.310645 | 5861   | 2  |
| 2.7 | PITPNC1  | NM_012417 | 219155_at   | Phosphatidylinositol transfer protein, cytoplasmic 1                              | Hs.591185 | 26207  | 17 |
| 2.7 | GOLGA4   | NM_002078 | 201567_s_at | Golgi autoantigen, golgin subfamily a, 4                                          | Hs.344151 | 2803   | 3  |
| 2.7 | IL6ST    | AL049265  | 212195_at   | Interleukin 6 signal transducer (gp130, oncostatin M receptor)                    | Hs.532082 | 3572   | 5  |
| 2.7 | TMEM135  | AK000684  | 222209_s_at | Transmembrane protein 135                                                         | Hs.188591 | 65084  | 11 |
| 2.7 | ARMET    | NM_006010 | 202655_at   | Arginine-rich, mutated in early stage tumors                                      | Hs.436446 | 7873   | 3  |
| 2.7 | DMXL1    | NM_005509 | 203791_at   | Dmx-like 1                                                                        | Hs.181042 | 1657   | 5  |
| 2.7 | C11orf24 | AA065185  | 52164_at    | Chromosome 11 open reading frame 24                                               | Hs.303025 | 53838  | 11 |
| 2.7 | PGM1     | NM_002633 | 201968_s_at | Phosphoglucomutase 1                                                              | Hs.1869   | 5236   | 1  |
| 2.7 | C7orf42  | NM_017994 | 218008_at   | Chromosome 7 open reading frame 42                                                | Hs.488478 | 55069  | 7  |
| 2.7 | YES1     | NM_005433 | 202933_s_at | V-yes-1 Yamaguchi sarcoma viral oncogene homolog 1                                | Hs.194148 | 7525   | 18 |
| 2.7 | PIP4K2A  | BE878277  | 212829_at   | Phosphatidylinositol-5-phosphate 4-kinase, type II, alpha                         | Hs.57079  | 5305   | 10 |
| 2.7 | UBA6     | NM_018227 | 218340_s_at | Ubiquitin-like modifier activating enzyme 6                                       | Hs.719086 | 55236  | 4  |
| 2.7 | ACVR1    | NM_001105 | 203935_at   | Activin A receptor, type I                                                        | Hs.470316 | 90     | 2  |
| 2.7 | GTF2E1   | NM_005513 | 205930_at   | General transcription factor IIE, polypeptide 1, alpha 56kDa                      | Hs.445272 | 2960   | 3  |
| 2.7 | INPP1    | NM_002194 | 202794_at   | Inositol polyphosphate-1-phosphatase                                              | Hs.32309  | 3628   | 2  |
| 2.7 | CTBP2    | N23018    | 201218_at   | C-terminal binding protein 2                                                      | Hs.501345 | 1488   | 10 |
| 2.7 | AB1      | AF006516  | 209028_s_at | Abl-interactor 1                                                                  | Hs.508148 | 10006  | 10 |
| 2.7 | KPNA2    | NM_002266 | 201088_at   | Karyopherin alpha 2 (RAG cohort 1, importin alpha 1)                              | Hs.594238 | 3838   | 17 |
| 2.7 | PSMD11   | AF001212  | 208777_s_at | Proteasome (prosome, macropain) 26S subunit, non-ATPase, 11                       | Hs.655396 | 5717   | 17 |
| 2.7 | LEPROTL1 | NM_015344 | 202594_at   | Leptin receptor overlapping transcript-like 1                                     | Hs.146585 | 23484  | 8  |
| 2.7 | ATP6AP1  | NM_001183 | 207809_s_at | ATPase, H+ transporting, lysosomal accessory protein 1                            | Hs.6551   | 537    | X  |
| 2.7 | ITGB1    | BG500301  | 211945_s_at | integrin, beta 1                                                                  | Hs.715779 | -      | 10 |
| 2.7 | UMPS     | AL080099  | 215165_x_at | Uridine monophosphate synthetase                                                  | Hs.2057   | 7372   | 3  |
| 2.7 | CBLB     | U26710    | 209682_at   | Cas-Br-M (murine) ecotropic retroviral transforming sequence b                    | Hs.430589 | 868    | 3  |

## Up-Regulated Transcripts (u133A U133B)

|     |            |           |             |                                                                     |           |        |    |
|-----|------------|-----------|-------------|---------------------------------------------------------------------|-----------|--------|----|
| 2.7 | PLCG2      | NM_002661 | 204613_at   | Phospholipase C, gamma 2 (phosphatidylinositol-specific)            | Hs.413111 | 5336   | 16 |
| 2.7 | PIGF       | NM_002643 | 205078_at   | Phosphatidylinositol glycan anchor biosynthesis, class F            | Hs.468415 | 5281   | 2  |
| 2.7 | NCRNA00275 | AV756131  | 224915_x_at | Chromosome 20 open reading frame 199                                |           |        |    |
| 2.6 | UBE2A      | NM_003336 | 201899_s_at | Ubiquitin-conjugating enzyme E2A (RAD6 homolog)                     | Hs.379466 | 7319   | X  |
| 2.6 | RCOR1      | D31888    | 212612_at   | REST corepressor 1                                                  | Hs.510521 | 23186  | 14 |
| 2.6 | HJURP      | NM_018410 | 218726_at   | Holliday junction recognition protein                               | Hs.532968 | 55355  | 2  |
| 2.6 | PRC1       | NM_003981 | 218009_s_at | Protein regulator of cytokinesis 1                                  | Hs.567385 | 9055   | 15 |
| 2.6 | PCYOX1L    | NM_024028 | 218953_s_at | Preylcysteine oxidase 1 like                                        | Hs.644397 | 78991  | 5  |
| 2.6 | SYNRG      | AI472320  | 221937_at   | CDNA FLJ34482 fis, clone HLUNG2004067                               | Hs.594647 | -      | 17 |
| 2.6 | TRAPPC4    | NM_016146 | 217959_s_at | Trafficking protein particle complex 4                              | Hs.132760 | 51399  | 11 |
| 2.6 | SLC2A3     | AI631159  | 202497_x_at | Solute carrier family 2 (facilitated glucose transporter), member 3 | Hs.419240 | 6515   | 12 |
| 2.6 | CRKL       | AK000311  | 212180_at   | V-crk sarcoma virus CT10 oncogene homolog (avian)-like              | Hs.592205 | 1399   | 22 |
| 2.6 | CD58       | BC005930  | 211744_s_at | CD58 molecule                                                       | Hs.34341  | 965    | 1  |
| 2.6 | TBK1       | NM_013254 | 218520_at   | TANK-binding kinase 1                                               | Hs.505874 | 29110  | 12 |
| 2.6 | WARS       | NM_004184 | 200629_at   | Tryptophanyl-tRNA synthetase                                        | Hs.497599 | 7453   | 14 |
| 2.6 | MAT2B      | NM_013283 | 217993_s_at | Methionine adenosyltransferase II, beta                             | Hs.54642  | 27430  | 5  |
| 2.6 | WWP1       | AU155187  | 212637_s_at | WW domain containing E3 ubiquitin protein ligase 1                  | Hs.655189 | 11059  | 8  |
| 2.6 | HIGD1A     | BE739519  | 221896_s_at | Transcribed locus                                                   | Hs.7917   | -      | 3  |
| 2.6 | PSMD14     | NM_005805 | 212296_at   | Proteasome (prosome, macropain) 26S subunit, non-ATPase, 14         | Hs.567410 | 10213  | 2  |
| 2.6 | PRO0461    | NM_018992 | 218474_s_at | Hypothetical LOC652276                                              | Hs.61960  | 652276 | 16 |
| 2.6 | NUSAP1     | NM_016359 | 218039_at   | Nucleolar and spindle associated protein 1                          | Hs.615092 | 51203  | 15 |
| 2.6 | GIGYF2     | AL045800  | 212260_at   | GRB10 interacting GYF protein 2                                     | Hs.565319 | 26058  | 2  |
| 2.6 | NCAPG2     | NM_017760 | 219588_s_at | Non-SMC condensin II complex, subunit G2                            | Hs.18616  | 54892  | 7  |
| 2.6 | CDC5L      | AW268817  | 209055_s_at | CDC5 cell division cycle 5-like (S. pombe)                          | Hs.485471 | 988    | 6  |
| 2.6 | ITFG1      | NM_030790 | 221449_s_at | Integrin alpha FG-GAP repeat containing 1                           | Hs.42217  | 81533  | 16 |
| 2.6 | DCXR       | NM_016286 | 217973_at   | Dicarbonyl/L-xylulose reductase                                     | Hs.9857   | 51181  | 17 |
| 2.6 | MUDENG     | NM_018229 | 218139_s_at | MU-2/AP1M2 domain containing, death-inducing                        | Hs.597349 | 55745  | 14 |
| 2.6 | GLA        | NM_000169 | 214430_at   | Galactosidase, alpha                                                | Hs.69089  | 2717   | X  |
| 2.6 | H2AFX      | AA760862  | 212525_s_at | H2A histone family, member X                                        | -         | -      | -  |
| 2.6 | TACC3      | NM_006342 | 218308_at   | Transforming, acidic coiled-coil containing protein 3               | Hs.104019 | 10460  | 4  |
| 2.6 | CHMP5      | NM_015961 | 218085_at   | chromatin modifying protein 5                                       | -         | 51510  | -  |
| 2.6 | CCPG1      | AB033080  | 221511_x_at | Cell cycle progression 1                                            | Hs.285051 | 9236   | 15 |
| 2.6 | RARG       | NM_000966 | 204189_at   | Retinoic acid receptor, gamma                                       | Hs.1497   | 5916   | 12 |
| 2.6 | SLC43A3    | AI630178  | 213113_s_at | Solute carrier family 43, member 3                                  | Hs.99962  | 29015  | 11 |
| 2.6 | CALU       | NM_001219 | 200757_s_at | Calumenin                                                           | Hs.718425 | 813    | 7  |
| 2.6 | RAB11A     | AI215102  | 200863_s_at | RAB11A, member RAS oncogene family                                  | Hs.321541 | 8766   | 15 |
| 2.6 | PANX1      | NM_015368 | 204715_at   | Pannexin 1                                                          | Hs.591976 | 24145  | 11 |
| 2.6 | MEF2A      | AA142929  | 212535_at   | Myocyte enhancer factor 2A                                          | Hs.268675 | 4205   | 15 |
| 2.6 | PDGFC      | NM_016205 | 218718_at   | Platelet derived growth factor C                                    | Hs.570855 | 56034  | 4  |
| 2.6 | TPX2       | AF098158  | 210052_s_at | TPX2, microtubule-associated, homolog (Xenopus laevis)              | Hs.719145 | 22974  | 20 |
| 2.6 | NFX1       | NM_002504 | 202585_s_at | Nuclear transcription factor, X-box binding 1                       | Hs.413074 | 4799   | 9  |
| 2.5 | VDAC3      | U90943    | 208846_s_at | Voltage-dependent anion channel 3                                   | Hs.699301 | 7419   | 8  |
| 2.5 | ATP6V1C1   | NM_001695 | 202874_s_at | ATPase, H+ transporting, lysosomal 42kDa, V1 subunit C1             | Hs.86905  | 528    | 8  |
| 2.5 | RAB14      | AA919115  | 200927_s_at | RAB14, member RAS oncogene family                                   | Hs.371563 | 51552  | 9  |
| 2.5 | CD2AP      | NM_012120 | 203593_at   | CD2-associated protein                                              | Hs.485518 | 23607  | 6  |
| 2.5 | CYB5B      | AW235051  | 201633_s_at | cytochrome b5 type B (outer mitochondrial membrane)                 | -         | -      | -  |
| 2.5 | IGF2BP3    | NM_006547 | 203820_s_at | Insulin-like growth factor 2 mRNA binding protein 3                 | Hs.700696 | 10643  | 7  |
| 2.5 | TUBA3D     | K03460    | 216323_x_at | tubulin, alpha 3d                                                   | -         | 113457 | -  |
| 2.5 | CAPN1      | NM_005186 | 200752_s_at | Calpain 1, (mu/I) large subunit                                     | Hs.502842 | 823    | 11 |
| 2.5 | CENPF      | NM_005196 | 207828_s_at | centromere protein F, 350/400ka (mitosin)                           | -         | -      | -  |
| 2.5 | LYL1       | BC002796  | 210044_s_at | Lymphoblastic leukemia derived sequence 1                           | Hs.46446  | 4066   | 19 |
| 2.5 | G3BP1      | BG500067  | 201503_at   | Transcribed locus                                                   | Hs.718672 | -      | 5  |
| 2.5 | ESPL1      | NM_012291 | 204817_at   | Extra spindle pole bodies homolog 1 (S. cerevisiae)                 | Hs.153479 | 9700   | 12 |
| 2.5 | KIF2C      | U63743    | 209408_at   | Kinesin family member 2C                                            | Hs.69360  | 11004  | 1  |
| 2.5 | RAN        | BF112006  | 200749_at   | RAN, member RAS oncogene family                                     | Hs.10842  | 5901   | 12 |
| 2.5 | SMC2       | NM_006444 | 204240_s_at | Structural maintenance of chromosomes 2                             | Hs.119023 | 10592  | 9  |
| 2.5 | PDI6       | AK026926  | 216640_s_at | protein disulfide isomerase family A, member 6                      | -         | -      | -  |

## Up-Regulated Transcripts (u133A U133B)

|     |          |           |             |                                                                                               |           |           |    |
|-----|----------|-----------|-------------|-----------------------------------------------------------------------------------------------|-----------|-----------|----|
| 2.5 | IL4R     | NM_000418 | 203233_at   | Interleukin 4 receptor                                                                        | Hs.513457 | 3566      | 16 |
| 2.5 | CDK2AP2  | NM_005851 | 203252_at   | Cyclin-dependent kinase 2 associated protein 2                                                | Hs.523835 | 10263     | 11 |
| 2.5 | PSMD10   | NM_002814 | 219485_s_at | Proteasome (prosome, macropain) 26S subunit, non-ATPase, 10                                   | Hs.522752 | 5716      | X  |
| 2.5 | KPNA1    | AA652173  | 202055_at   | Karyopherin alpha 1 (importin alpha 5)                                                        | Hs.161008 | 3836      | 3  |
| 2.5 | ATP6V1B2 | NM_001693 | 201089_at   | ATPase, H+ transporting, lysosomal 56/58kDa, V1 subunit B2                                    | Hs.295917 | 526       | 8  |
| 2.5 | ZNF225   | NM_013362 | 207125_at   | Zinc finger protein 225                                                                       | Hs.279567 | 7768      | 19 |
| 2.5 | SDPR     | NM_004657 | 218711_s_at | Serum deprivation response (phosphatidylserine binding protein)                               | Hs.26530  | 8436      | 2  |
| 2.5 | STK24    | AA586774  | 208854_s_at | Serine/threonine kinase 24 (STE20 homolog, yeast)                                             | Hs.508514 | 8428      | 13 |
| 2.5 | LASP1    | NM_006148 | 200618_at   | LIM and SH3 protein 1, mRNA (cDNA clone IMAGE:3632974)                                        | Hs.548018 | 100130146 | 17 |
| 2.5 | SELPLG   | AI741056  | 209879_at   | Selectin P ligand                                                                             | Hs.591014 | 6404      | 12 |
| 2.5 | P2RX1    | U45448    | 210401_at   | Purinergic receptor P2X, ligand-gated ion channel, 1                                          | Hs.41735  | 5023      | 17 |
| 2.5 | GGA2     | BC000284  | 210658_s_at | Golgi associated, gamma adaptin ear containing, ARF binding protein 2                         | Hs.460336 | 23062     | 16 |
| 2.5 | ELOVL1   | NM_016031 | 218028_at   | elongation of very long chain fatty acids (FEN1/Elo2, SUR4/Elo3, yeast)-like 1                | -         | 64834     | -  |
| 2.5 | SMC3     | AF020043  | 209259_s_at | Structural maintenance of chromosomes 3                                                       | Hs.24485  | 9126      | 10 |
| 2.5 | SNUPN    | NM_005701 | 207438_s_at | Snurportin 1                                                                                  | Hs.21577  | 10073     | 15 |
| 2.5 | ARMC7    | NM_024585 | 219096_at   | Armadillo repeat containing 7                                                                 | Hs.413047 | 79637     | 17 |
| 2.5 | MRPL18   | NM_014161 | 217907_at   | Mitochondrial ribosomal protein L18                                                           | Hs.416998 | 29074     | 6  |
| 2.5 | G3BP2    | AB014560  | 208841_s_at | GTPase activating protein (SH3 domain) binding protein 2                                      | Hs.303676 | 9908      | 4  |
| 2.5 | MKRN1    | NM_013446 | 201285_at   | Makorin ring finger protein 1                                                                 | Hs.490347 | 23608     | 7  |
| 2.5 | CSTB     | NM_000100 | 201201_at   | Cystatin B (stefin B)                                                                         | Hs.695    | 1476      | 21 |
| 2.5 | SH3GLB1  | AF263293  | 209091_s_at | SH3-domain GRB2-like endophilin B1                                                            | Hs.136309 | 51100     | 1  |
| 2.5 | CSE1L    | AF053640  | 210766_s_at | CSE1 chromosome segregation 1-like (yeast)                                                    | -         | 1434      | -  |
| 2.5 | MAPRE2   | NM_014268 | 202501_at   | Microtubule-associated protein, RP/EB family, member 2                                        | Hs.532824 | 10982     | 18 |
| 2.5 | MED6     | AF074723  | 210104_at   | Mediator complex subunit 6                                                                    | Hs.497353 | 10001     | 14 |
| 2.5 | DYNLL1   | NM_003746 | 200703_at   | Dynein, light chain, LC8-type 1                                                               | Hs.5120   | 8655      | 12 |
| 2.5 | UBA3     | AL117566  | 209115_at   | Ubiquitin-like modifier activating enzyme 3                                                   | Hs.154320 | 9039      | 3  |
| 2.5 | NINJ2    | NM_016533 | 219594_at   | Ninjurin 2                                                                                    | Hs.656450 | 4815      | 12 |
| 2.4 | TMEM168  | NM_022484 | 218962_s_at | Transmembrane protein 168                                                                     | Hs.709689 | 64418     | 7  |
| 2.4 | COP54    | NM_016129 | 218042_at   | COP9 constitutive photomorphogenic homolog subunit 4 (Arabidopsis)                            | Hs.190384 | 51138     | 4  |
| 2.4 | AMACR    | AF047020  | 209426_s_at | Alpha-methylacyl-CoA racemase                                                                 | Hs.508343 | 23600     | 5  |
| 2.4 | ABHD4    | NM_022060 | 218581_at   | Abhydrolase domain containing 4                                                               | Hs.445665 | 63874     | 14 |
| 2.4 | KIF20A   | NM_005733 | 218755_at   | Kinesin family member 20A                                                                     | Hs.718626 | 10112     | 5  |
| 2.4 | ZMYND8   | BC001004  | 209049_s_at | zinc finger, MYND-type containing 8                                                           | -         | 23613     | -  |
| 2.4 | SERPINE2 | AL541302  | 212190_at   | Serpin peptidase inhibitor, clade E (nexin, plasminogen activator inhibitor type 1), member 2 | Hs.38449  | 5270      | 2  |
| 2.4 | CLASP2   | AI741784  | 212306_at   | Cytoplasmic linker associated protein 2                                                       | Hs.108614 | 23122     | 3  |
| 2.4 | EIF4G1   | AF104913  | 208625_s_at | Eukaryotic translation initiation factor 4 gamma, 1                                           | Hs.433750 | 1981      | 3  |
| 2.4 | FAM162A  | NM_014367 | 220942_x_at | Family with sequence similarity 162, member A                                                 | Hs.584881 | 26355     | 3  |
| 2.4 | ARL8B    | NM_018184 | 217852_s_at | ADP-ribosylation factor-like 8B                                                               | Hs.719100 | 55207     | 3  |
| 2.4 | RCHY1    | AI096477  | 212749_s_at | Ring finger and CHY zinc finger domain containing 1                                           | Hs.48297  | 25898     | 4  |
| 2.4 | UBE2L3   | AI819709  | 200684_s_at | Ubiquitin-conjugating enzyme E2L 3                                                            | Hs.108104 | 7332      | 22 |
| 2.4 | ITPR1    | NM_002222 | 203710_at   | Inositol 1,4,5-triphosphate receptor, type 1                                                  | Hs.567295 | 3708      | 3  |
| 2.4 | RALB     | BG169673  | 202100_at   | V-ral simian leukemia viral oncogene homolog B (ras related; GTP binding protein)             | Hs.469820 | 5899      | 2  |
| 2.4 | DCN      | NM_001920 | 201894_s_at | Decorin                                                                                       | Hs.718429 | 1634      | 12 |
| 2.4 | MORC2    | NM_014941 | 203956_at   | MORC family CW-type zinc finger 2                                                             | Hs.555918 | 22880     | 22 |
| 2.4 | PHKB     | BG149218  | 202738_s_at | Phosphorylase kinase, beta                                                                    | Hs.78060  | 5257      | 16 |
| 2.4 | PPP2R5C  | NM_002719 | 201877_s_at | Protein phosphatase 2, regulatory subunit B', gamma isoform                                   | Hs.368264 | 5527      | 14 |
| 2.4 | STAU2    | NM_014393 | 204226_at   | Staufen, RNA binding protein, homolog 2 (Drosophila)                                          | Hs.561815 | 27067     | 8  |
| 2.4 | CDKN1B   | BC001971  | 209112_at   | Cyclin-dependent kinase inhibitor 1B (p27, Kip1)                                              | Hs.238990 | 1027      | 12 |
| 2.4 | PIIB     | NM_000942 | 200968_s_at | Peptidylprolyl isomerase B (cyclophilin B)                                                    | Hs.434937 | 5479      | 15 |
| 2.4 | CCL21    | NM_002989 | 204606_at   | Chemokine (C-C motif) ligand 21                                                               | Hs.57907  | 6366      | 9  |
| 2.4 | PSMC4    | NM_006503 | 201252_at   | Proteasome (prosome, macropain) 26S subunit, ATPase, 4                                        | Hs.211594 | 5704      | 19 |
| 2.4 | PGAM1    | NM_002629 | 200886_s_at | Phosphoglycerate mutase 1 (brain)                                                             | Hs.632918 | 5223      | 10 |
| 2.4 | PRKCB    | NM_002738 | 207957_s_at | Protein kinase C, beta                                                                        | Hs.460355 | 5579      | 16 |
| 2.4 | KIF4A    | NM_012310 | 218355_at   | Kinesin family member 4A                                                                      | Hs.648326 | 24137     | X  |
| 2.4 | GNS      | AW167793  | 212335_at   | Glucosamine (N-acetyl)-6-sulfatase                                                            | Hs.334534 | 2799      | 12 |
| 2.4 | EIF2AK3  | NM_004836 | 218696_at   | Eukaryotic translation initiation factor 2-alpha kinase 3                                     | Hs.591589 | 9451      | 2  |
| 2.4 | RNF111   | NM_017610 | 218761_at   | Ring finger protein 111                                                                       | Hs.404423 | 54778     | 15 |

## Up-Regulated Transcripts (u133A U133B)

|     |            |           |             |                                                                                           |           |        |    |
|-----|------------|-----------|-------------|-------------------------------------------------------------------------------------------|-----------|--------|----|
| 2.4 | PDIA5      | NM_006810 | 203857_s_at | Protein disulfide isomerase family A, member 5                                            | Hs.477352 | 10954  | 3  |
| 2.4 | NCRNA00081 | AV706096  | 213220_at   | Non-protein coding RNA 81                                                                 | Hs.232543 | 92482  | 10 |
| 2.4 | C15orf39   | NM_015492 | 204495_s_at | Chromosome 15 open reading frame 39                                                       | Hs.17936  | 56905  | 15 |
| 2.4 | EFHC2      | NM_025184 | 220591_s_at | EF-hand domain (C-terminal) containing 2                                                  | Hs.521953 | 80258  | X  |
| 2.4 | MGAT4B     | NM_014275 | 220189_s_at | Mannosyl (alpha-1,3-)-glycoprotein beta-1,4-N-acetylglucosaminyltransferase, isozyme      | Hs.567419 | 11282  | 5  |
| 2.4 | COPB1      | NM_016451 | 201359_at   | Coatomer protein complex, subunit beta 1                                                  | Hs.339278 | 1315   | 11 |
| 2.4 | PDXK       | NM_003681 | 202671_s_at | Pyridoxal (pyridoxine, vitamin B6) kinase                                                 | Hs.284491 | 8566   | 21 |
| 2.4 | MLX        | BF056105  | 217909_s_at | MAX-like protein X                                                                        | Hs.714749 | 6945   | 17 |
| 2.4 | TMCO1      | AB020980  | 208716_s_at | Transmembrane and coiled-coil domains 1                                                   | Hs.31498  | 54499  | 1  |
| 2.4 | AASDHPPT   | AF302110  | 202169_s_at | Aminoadipate-semialdehyde dehydrogenase-phosphopantetheinyl transferase                   | Hs.524009 | 60496  | 11 |
| 2.4 | TMEM8      | AI636233  | 221882_s_at | Transmembrane protein 8 (five membrane-spanning domains)                                  | Hs.288940 | 58986  | 16 |
| 2.4 | GYG1       | AF087942  | 211275_s_at | Glycogenin 1                                                                              | Hs.477892 | 2992   | 3  |
| 2.4 | EFR3A      | AA805651  | 212150_at   | EFR3 homolog A ( <i>S. cerevisiae</i> )                                                   | Hs.204564 | 23167  | 8  |
| 2.4 | IKBK       | AF091453  | 209929_s_at | Inhibitor of kappa light polypeptide gene enhancer in B-cells, kinase gamma               | Hs.43505  | 8517   | X  |
| 2.3 | C15orf24   | NM_020154 | 217898_at   | Chromosome 15 open reading frame 24                                                       | Hs.160565 | 56851  | 15 |
| 2.3 | ALAS1      | NM_000688 | 205633_s_at | Aminolevulinate, delta-, synthase 1                                                       | Hs.476308 | 211    | 3  |
| 2.3 | DSTN       | BF697964  | 201021_s_at | Dextrin (actin depolymerizing factor)                                                     | Hs.304192 | 11034  | 20 |
| 2.3 | SMAD5      | AF010601  | 205187_at   | SMAD family member 5                                                                      | Hs.167700 | 4090   | 5  |
| 2.3 | RPS6KC1    | NM_012424 | 218909_at   | Ribosomal protein S6 kinase, 52kDa, polypeptide 1                                         | Hs.591416 | 26750  | 1  |
| 2.3 | FAM129A    | AF288391  | 217967_s_at | Family with sequence similarity 129, member A                                             | Hs.518662 | 116496 | 1  |
| 2.3 | KIF18B     | AA292789  | 222039_at   | Kinesin family member 18B                                                                 | Hs.135094 | 146909 | 17 |
| 2.3 | SEP15      | NM_004261 | 200902_at   | 15 kDa selenoprotein                                                                      | Hs.362728 | 9403   | 1  |
| 2.3 | ATOX1      | NM_004045 | 203454_s_at | ATOX1 antioxidant protein 1 homolog (yeast)                                               | Hs.125213 | 475    | 5  |
| 2.3 | RAC1       | BG292367  | 208640_at   | Transcribed locus, weakly similar to XP_001065903.1 PREDICTED: hypothetical protein       | Hs.705664 | -      | 7  |
| 2.3 | RAB32      | NM_006834 | 204214_s_at | RAB32, member RAS oncogene family                                                         | Hs.287714 | 10981  | 6  |
| 2.3 | UCRC       | NM_013387 | 218190_s_at | Ubiquinol-cytochrome c reductase complex (7.2 kD)                                         | Hs.284292 | 29796  | 22 |
| 2.3 | C3orf63    | N38985    | 209285_s_at | Chromosome 3 open reading frame 63                                                        | Hs.116877 | 23272  | 3  |
| 2.3 | BAG5       | NM_004873 | 202985_s_at | BCL2-associated athanogene 5                                                              | Hs.5443   | 9529   | 14 |
| 2.3 | SKP2       | NM_005983 | 203626_s_at | S-phase kinase-associated protein 2 (p45)                                                 | Hs.23348  | 6502   | 5  |
| 2.3 | CUL1       | NM_003592 | 207614_s_at | Cullin 1                                                                                  | Hs.146806 | 8454   | 7  |
| 2.3 | PSMD7      | NM_002811 | 201705_at   | Proteasome (prosome, macropain) 26S subunit, non-ATPase, 7                                | Hs.440604 | 5713   | 16 |
| 2.3 | NARS       | NM_004539 | 200027_at   | Asparaginyl-tRNA synthetase                                                               | Hs.465224 | 4677   | 18 |
| 2.3 | DYNC1I2    | AF250307  | 211684_s_at | Dynein, cytoplasmic 1, intermediate chain 2                                               | Hs.546250 | 1781   | 2  |
| 2.3 | SULT1A1    | NM_001055 | 203615_x_at | Sulfotransferase family, cytosolic, 1A, phenol-preferring, member 1                       | Hs.567342 | 6817   | 16 |
| 2.3 | ANGPT1     | NM_001146 | 205609_at   | Angiopoietin 1                                                                            | Hs.369675 | 284    | 8  |
| 2.3 | RNF6       | NM_005977 | 203403_s_at | Ring finger protein (C3H2C3 type) 6                                                       | Hs.136885 | 6049   | 13 |
| 2.3 | PTPN6      | NM_002831 | 206687_s_at | Protein tyrosine phosphatase, non-receptor type 6                                         | Hs.63489  | 5777   | 12 |
| 2.3 | CDC27      | NM_001256 | 217881_s_at | Cell division cycle 27 homolog ( <i>S. cerevisiae</i> )                                   | Hs.463295 | 996    | 17 |
| 2.3 | CAND1      | AL136810  | 208839_s_at | Cullin-associated and neddylation-dissociated 1                                           | Hs.546407 | 55832  | 12 |
| 2.3 | TWRF2      | NM_007284 | 202009_at   | Twinfilin, actin-binding protein, homolog 2 ( <i>Drosophila</i> )                         | Hs.436439 | 11344  | 3  |
| 2.3 | OAZ1       | AF090094  | 215952_s_at | Ornithine decarboxylase antizyme 1                                                        | Hs.446427 | 4946   | 19 |
| 2.3 | PPM1B      | AF136972  | 209296_at   | Protein phosphatase 1B (formerly 2C), magnesium-dependent, beta isoform                   | Hs.416769 | 5495   | 2  |
| 2.3 | FAM96B     | NM_016062 | 218074_at   | Family with sequence similarity 96, member B                                              | Hs.9825   | 51647  | 16 |
| 2.3 | C14orf147  | AA142942  | 213508_at   | Chromosome 14 open reading frame 147                                                      | Hs.269909 | 171546 | 14 |
| 2.3 | C14orf139  | NM_024633 | 219563_at   | chromosome 14 open reading frame 139                                                      | -         | 79686  | -  |
| 2.3 | CD46       | AL570661  | 208783_s_at | CD46 molecule, complement regulatory protein                                              | Hs.510402 | 4179   | 1  |
| 2.3 | LYST       | NM_000081 | 203518_at   | Lysosomal trafficking regulator                                                           | Hs.532411 | 1130   | 1  |
| 2.3 | GEMIN6     | NM_024775 | 219539_at   | Gem (nuclear organelle) associated protein 6                                              | Hs.143818 | 79833  | 2  |
| 2.3 | PRKCQ      | AL137145  | 210038_at   | protein kinase C, theta                                                                   | -         | -      | -  |
| 2.3 | AGPAT2     | U56418    | 210678_s_at | 1-acylglycerol-3-phosphate O-acyltransferase 2 (lysophosphatidic acid acyltransferase, 2) | Hs.320151 | 10555  | 9  |
| 2.3 | PSME4      | AU143855  | 212222_at   | Proteasome (prosome, macropain) activator subunit 4                                       | Hs.413801 | 23198  | 2  |
| 2.3 | SAG        | NM_000541 | 206671_at   | S-antigen; retina and pineal gland (arrestin)                                             | Hs.32721  | 6295   | 2  |
| 2.3 | SEPHS2     | NM_012248 | 200961_at   | Selenophosphate synthetase 2                                                              | Hs.718460 | 22928  | 16 |
| 2.3 | TMEM50A    | NM_014313 | 217766_s_at | Transmembrane protein 50A                                                                 | Hs.523054 | 23585  | 1  |
| 2.3 | LRRC8D     | NM_018103 | 218684_at   | Leucine rich repeat containing 8 family, member D                                         | Hs.588647 | 55144  | 1  |
| 2.3 | CDC23      | NM_004661 | 202892_at   | Cell division cycle 23 homolog ( <i>S. cerevisiae</i> )                                   | Hs.73625  | 8697   | 5  |
| 2.3 | TPST2      | NM_003595 | 204079_at   | Tyrosylprotein sulfotransferase 2                                                         | Hs.632768 | 8459   | 22 |

## Up-Regulated Transcripts (u133A U133B)

|     |           |           |             |                                                                                                   |           |        |    |
|-----|-----------|-----------|-------------|---------------------------------------------------------------------------------------------------|-----------|--------|----|
| 2.3 | RUNX1     | D43968    | 209360_s_at | Runt-related transcription factor 1                                                               | Hs.149261 | 861    | 21 |
| 2.3 | CALM1     | AI653730  | 211985_s_at | Calmodulin 1 (phosphorylase kinase, delta)                                                        | Hs.282410 | 801    | 14 |
| 2.3 | DR1       | AW516932  | 209187_at   | Down-regulator of transcription 1, TBP-binding (negative cofactor 2)                              | Hs.348418 | 1810   | 1  |
| 2.3 | FAM18B    | NM_016078 | 218446_s_at | Family with sequence similarity 18, member B                                                      | Hs.87295  | 51030  | 17 |
| 2.3 | GNE       | NM_005476 | 205042_at   | Glucosamine (UDP-N-acetyl)-2-epimerase/N-acetylmannosamine kinase                                 | Hs.5920   | 10020  | 9  |
| 2.3 | SNAPC3    | U71300    | 210465_s_at | Small nuclear RNA activating complex, polypeptide 3, 50kDa                                        | Hs.546299 | 6619   | 9  |
| 2.3 | RAB8A     | BC002977  | 208819_at   | RAB8A, member RAS oncogene family                                                                 | Hs.642874 | 4218   | 19 |
| 2.3 | C3orf14   | NM_020685 | 219288_at   | Chromosome 3 open reading frame 14                                                                | Hs.47166  | 57415  | 3  |
| 2.3 | NT5DC2    | NM_022908 | 218051_s_at | 5'-nucleotidase domain containing 2                                                               | Hs.84753  | 64943  | 3  |
| 2.3 | ATPGVOE1  | AI252582  | 214149_s_at | Transcribed locus                                                                                 | Hs.712977 | -      | 5  |
| 2.3 | C13orf34  | NM_024808 | 219544_at   | Chromosome 13 open reading frame 34                                                               | Hs.714340 | 79866  | 13 |
| 2.3 | DAP       | NM_004394 | 201095_at   | Death-associated protein                                                                          | Hs.75189  | 1611   | 5  |
| 2.3 | LIMK2     | NM_005569 | 202193_at   | LIM domain kinase 2                                                                               | Hs.474596 | 3985   | 22 |
| 2.3 | C2orf44   | NM_025203 | 219120_at   | Chromosome 2 open reading frame 44                                                                | Hs.24624  | 80304  | 2  |
| 2.2 | NACC2     | AA114166  | 212993_at   | MRNA; cDNA DKFZp667B1718 (from clone DKFZp667B1718)                                               | Hs.531457 | -      | 9  |
| 2.2 | PDE6D     | NM_002601 | 204091_at   | Phosphodiesterase 6D, cGMP-specific, rod, delta                                                   | Hs.516808 | 5147   | 2  |
| 2.2 | TSPAN4    | AF054841  | 209264_s_at | Tetraspanin 4                                                                                     | Hs.654836 | 7106   | 11 |
| 2.2 | HP55      | NM_007216 | 204544_at   | Hermansky-Pudlak syndrome 5                                                                       | Hs.437599 | 11234  | 11 |
| 2.2 | HNRNPF    | AI591354  | 201376_s_at | Heterogeneous nuclear ribonucleoprotein F                                                         | Hs.808    | 3185   | 10 |
| 2.2 | MOCS2     | NM_004531 | 218212_s_at | Molybdenum cofactor synthesis 2                                                                   | Hs.163645 | 4338   | 5  |
| 2.2 | EFHA1     | AI346431  | 212410_at   | EF-hand domain family, member A1                                                                  | Hs.412103 | 221154 | 13 |
| 2.2 | STIP1     | BE886580  | 213330_s_at | Stress-induced-phosphoprotein 1                                                                   | Hs.337295 | 10963  | 11 |
| 2.2 | CDC6      | NM_001254 | 203968_s_at | Cell division cycle 6 homolog (S. cerevisiae)                                                     | Hs.405958 | 990    | 17 |
| 2.2 | NFYC      | NM_014223 | 202215_s_at | Nuclear transcription factor Y, gamma                                                             | Hs.233458 | 4802   | 1  |
| 2.2 | EBAG9     | NM_004215 | 204278_s_at | Estrogen receptor binding site associated, antigen, 9                                             | Hs.409368 | 9166   | 8  |
| 2.2 | CCDC92    | NM_025140 | 218175_at   | Coiled-coil domain containing 92                                                                  | Hs.114111 | 80212  | 12 |
| 2.2 | ASL       | NM_000048 | 204608_at   | Argininosuccinate lyase                                                                           | Hs.632015 | 435    | 7  |
| 2.2 | MAPK14    | NM_001315 | 202530_at   | Mitogen-activated protein kinase 14                                                               | Hs.485233 | 1432   | 6  |
| 2.2 | ACTR10    | AK022248  | 222230_s_at | Actin-related protein 10 homolog (S. cerevisiae)                                                  | Hs.509451 | 55860  | 14 |
| 2.2 | PSMD6     | NM_014814 | 202753_at   | Proteasome (prosome, macropain) 26S subunit, non-ATPase, 6                                        | Hs.152536 | 9861   | 3  |
| 2.2 | TMEM111   | NM_018447 | 217882_at   | Transmembrane protein 111                                                                         | Hs.475392 | 55831  | 3  |
| 2.2 | GORASP2   | NM_015530 | 207812_s_at | Golgi reassembly stacking protein 2, 55kDa                                                        | Hs.431317 | 26003  | 2  |
| 2.2 | SNRPG     | NM_003096 | 205644_s_at | Small nuclear ribonucleoprotein polypeptide G                                                     | Hs.516076 | 6637   | 2  |
| 2.2 | C7orf25   | BC000769  | 221573_at   | Chromosome 7 open reading frame 25                                                                | Hs.709957 | 79020  | 7  |
| 2.2 | RAB5B     | AF267863  | 201276_at   | RAB5B, member RAS oncogene family                                                                 | Hs.567328 | 5869   | 12 |
| 2.2 | MKL1      | AB037859  | 212748_at   | Megakaryoblastic leukemia (translocation) 1                                                       | Hs.654688 | 57591  | 22 |
| 2.2 | PSMA7     | NM_002792 | 201114_x_at | Proteasome (prosome, macropain) subunit, alpha type, 7                                            | Hs.233952 | 5688   | 20 |
| 2.2 | MICALL2   | NM_024723 | 219332_at   | MICAL-like 2                                                                                      | -         | 79778  |    |
| 2.2 | C10orf137 | AL050102  | 213410_at   | Chromosome 10 open reading frame 137                                                              | Hs.468688 | 26098  | 10 |
| 2.2 | MRPS14    | BG254653  | 203800_s_at | Mitochondrial ribosomal protein S14                                                               | Hs.702192 | 63931  | 1  |
| 2.2 | ZFP161    | AL534416  | 209724_s_at | Zinc finger protein 161 homolog (mouse)                                                           | Hs.592340 | 7541   | 18 |
| 2.2 | UBE3C     | NM_014671 | 201817_at   | Ubiquitin protein ligase E3C                                                                      | Hs.118351 | 9690   | 7  |
| 2.2 | RTCD1     | NM_003729 | 203594_at   | RNA terminal phosphate cyclase domain 1                                                           | Hs.484222 | 8634   | 1  |
| 2.2 | RHOF      | NM_019034 | 219045_at   | Ras homolog gene family, member F (in filopodia)                                                  | Hs.524804 | 54509  | 12 |
| 2.2 | OIP5      | BE045993  | 213599_at   | Opa interacting protein 5                                                                         | Hs.661645 | 11339  | 15 |
| 2.2 | CTPS      | NM_001905 | 202613_at   | CTP synthase                                                                                      | Hs.473087 | 1503   | 1  |
| 2.2 | TRIM13    | NM_005798 | 203659_s_at | Tripartite motif-containing 13                                                                    | Hs.436922 | 10206  | 13 |
| 2.2 | RGS18     | AF076642  | 223809_at   | Regulator of G-protein signaling 18                                                               |           |        |    |
| 2.2 | ANKRD17   | AI986295  | 212211_at   | Transcribed locus, strongly similar to NP_932127.2 ankyrin repeat domain protein 17 isoform 1     | Hs.601206 | -      | 4  |
| 2.2 | KRAS      | W80678    | 204009_s_at | V-Ki-ras2 Kirsten rat sarcoma viral oncogene homolog                                              | Hs.505033 | 3845   | 12 |
| 2.2 | SCFD1     | AB020724  | 215548_s_at | Sec1 family domain containing 1                                                                   | Hs.369168 | 23256  | 14 |
| 2.2 | SMARCA5   | NM_003601 | 202303_x_at | SWI/SNF related, matrix associated, actin dependent regulator of chromatin, subfamily 5, member A | Hs.558422 | 8467   | 4  |
| 2.2 | PHACTR2   | NM_014721 | 204049_s_at | Phosphatase and actin regulator 2                                                                 | Hs.102471 | 9749   | 6  |
| 2.2 | PSMD1     | AI860431  | 201198_s_at | Proteasome (prosome, macropain) 26S subunit, non-ATPase, 1                                        | Hs.3887   | 5707   | 2  |
| 2.2 | AHCYL2    | AB020635  | 212814_at   | S-adenosylhomocysteine hydrolase-like 2                                                           | Hs.600789 | 23382  | 7  |
| 2.2 | FGF18     | NM_003862 | 206987_x_at | Fibroblast growth factor 18                                                                       | Hs.87191  | 8817   | 5  |
| 2.2 | NPC1      | NM_000271 | 202679_at   | Niemann-Pick disease, type C1                                                                     | Hs.715623 | 4864   | 18 |

## Up-Regulated Transcripts (u133A U133B)

|     |           |           |             |                                                                                      |           |        |     |
|-----|-----------|-----------|-------------|--------------------------------------------------------------------------------------|-----------|--------|-----|
| 2.2 | SAMD9     | NM_017654 | 219691_at   | Sterile alpha motif domain containing 9                                              | Hs.65641  | 54809  | 7   |
| 2.2 | TM9SF3    | NM_020123 | 217758_s_at | Transmembrane 9 superfamily member 3                                                 | Hs.500674 | 56889  | 10  |
| 2.1 | STAM      | NM_003473 | 203544_s_at | Signal transducing adaptor molecule (SH3 domain and ITAM motif) 1                    | Hs.441498 | 8027   | 10  |
| 2.1 | PD55B     | NM_015032 | 204742_s_at | PD55, regulator of cohesion maintenance, homolog B (S. cerevisiae)                   | Hs.716441 | 23047  | 13  |
| 2.1 | GLB1      | NM_000404 | 201576_s_at | Galactosidase, beta 1                                                                | Hs.443031 | 2720   | 3   |
| 2.1 | PSMA5     | NM_002790 | 201274_at   | Proteasome (prosome, macropain) subunit, alpha type, 5                               | Hs.712557 | 5686   | 1   |
| 2.1 | TOP1      | J03250    | 208901_s_at | Topoisomerase (DNA) I                                                                | Hs.472737 | 7150   | 20  |
| 2.1 | PCYT2     | BC000351  | 209577_at   | Phosphate cytidylyltransferase 2, ethanolamine                                       | Hs.645248 | 5833   | 17  |
| 2.1 | SH2B3     | NM_005475 | 203320_at   | SH2B adaptor protein 3                                                               | Hs.506784 | 10019  | 12  |
| 2.1 | TDG       | NM_003211 | 203743_s_at | Thymine-DNA glycosylase                                                              | Hs.584809 | 6996   | 12  |
| 2.1 | CC2D2B    | NM_024343 | 219731_at   | Homo sapiens hypothetical protein MGC10764 (MGC10764), mRNA.                         | -         | -      | -   |
| 2.1 | VAMP7     | NM_005638 | 202829_s_at | Vesicle-associated membrane protein 7                                                | Hs.24167  | 6845   | X Y |
| 2.1 | VPS26A    | NM_004896 | 201807_at   | Vacuolar protein sorting 26 homolog A (S. pombe)                                     | Hs.499925 | 9559   | 10  |
| 2.1 | -         | W87688    | 213598_at   | Transcribed locus, strongly similar to NP_001039501.1 dimethyladenosine transferase  | Hs.533222 | -      | 5   |
| 2.1 | MFAP1     | NM_005926 | 203406_at   | Microfibrillar-associated protein 1                                                  | Hs.61418  | 4236   | 15  |
| 2.1 | CAPZB     | NM_004930 | 201950_x_at | Capping protein (actin filament) muscle Z-line, beta                                 | Hs.432760 | 832    | 1   |
| 2.1 | ATG9A     | NM_024085 | 202492_at   | ATG9 autophagy related 9 homolog A (S. cerevisiae)                                   | Hs.323363 | 79065  | 2   |
| 2.1 | WDR7      | AB011113  | 212880_at   | WD repeat domain 7                                                                   | Hs.465213 | 23335  | 18  |
| 2.1 | EPS15     | NM_001981 | 217887_s_at | Epidermal growth factor receptor pathway substrate 15                                | Hs.83722  | 2060   | 1   |
| 2.1 | NCAPD2    | AK022511  | 201774_s_at | Non-SMC condensin I complex, subunit D2                                              | Hs.5719   | 9918   | 12  |
| 2.1 | SLC35B1   | NM_005827 | 202433_at   | Solute carrier family 35, member B1                                                  | Hs.154073 | 10237  | 17  |
| 2.1 | ZZEF1     | AB007859  | 212601_at   | Zinc finger, ZZ-type with EF-hand domain 1                                           | Hs.277624 | 23140  | 17  |
| 2.1 | CD55      | BC001288  | 201926_s_at | CD55 molecule, decay accelerating factor for complement (Cromer blood group)         | Hs.126517 | 1604   | 1   |
| 2.1 | PSMB2     | NM_002794 | 200039_s_at | Proteasome (prosome, macropain) subunit, beta type, 2                                | Hs.471441 | 5690   | 1   |
| 2.1 | INTS7     | AK001363  | 222250_s_at | Integrator complex subunit 7                                                         | Hs.369285 | 25896  | 1   |
| 2.1 | CLCC1     | AA883493  | 213628_at   | Chloride channel CLIC-like 1                                                         | Hs.658489 | 23155  | 1   |
| 2.1 | SLC18A2   | AI269290  | 205857_at   | Solute carrier family 18 (vesicular monoamine), member 2                             | Hs.654476 | 6571   | 10  |
| 2.1 | USP1      | NM_003368 | 202413_s_at | Ubiquitin specific peptidase 1                                                       | Hs.35086  | 7398   | 1   |
| 2.1 | RYBP      | AB029551  | 201845_s_at | RING1 and YY1 binding protein                                                        | Hs.7910   | 23429  | 3   |
| 2.1 | ATP2A2    | M23114    | 209186_at   | ATPase, Ca++ transporting, cardiac muscle, slow twitch 2                             | Hs.506759 | 488    | 12  |
| 2.1 | DEGS1     | BC000961  | 209250_at   | Degenerative spermatocyte homolog 1, lipid desaturase (Drosophila)                   | Hs.299878 | 8560   | 1   |
| 2.1 | EIF4E2    | BF516289  | 213571_s_at | Eukaryotic translation initiation factor 4E family member 2                          | Hs.292026 | 9470   | 2   |
| 2.1 | STRN3     | NM_014574 | 204496_at   | Striatin, calmodulin binding protein 3                                               | Hs.401843 | 29966  | 14  |
| 2.1 | GOLGA5    | NM_005113 | 218241_at   | Golgi autoantigen, golgin subfamily a, 5                                             | Hs.104320 | 9950   | 14  |
| 2.1 | FLJ14213  | NM_024841 | 219383_at   | Protor-2                                                                             | Hs.19987  | 79899  | 11  |
| 2.1 | PPCS      | NM_024664 | 218341_at   | Phosphopantothenoylcysteine synthetase                                               | Hs.710166 | 79717  | 1   |
| 2.1 | ARFGEF2   | AL121903  | 218098_at   | ADP-ribosylation factor guanine nucleotide-exchange factor 2 (brefeldin A-inhibited) | -         | -      | -   |
| 2.1 | MAP3K7    | AF218074  | 211537_x_at | Mitogen-activated protein kinase kinase kinase 7                                     | Hs.719192 | 6885   | 6   |
| 2.1 | RPL24     | NM_000986 | 200013_at   | Ribosomal protein L24                                                                |           |        |     |
| 2.1 | COX8A     | NM_004074 | 201119_s_at | Cytochrome c oxidase subunit 8A (ubiquitous)                                         | Hs.433901 | 1351   | 11  |
| 2.1 | ARHGAP1   | BG468434  | 202117_at   | Full length insert cDNA clone ZE01F11                                                | Hs.660321 | -      | 11  |
| 2.1 | POLR2B    | NM_000938 | 201803_at   | Polymerase (RNA) II (DNA directed) polypeptide B, 140kDa                             | Hs.602757 | 5431   | 4   |
| 2.1 | TEX264    | NM_015926 | 218548_x_at | Testis expressed 264                                                                 | Hs.517864 | 51368  | 3   |
| 2.1 | ZNF24     | AU144066  | 212534_at   | Zinc finger protein 24                                                               | Hs.514802 | 7572   | 18  |
| 2.1 | TROVE2    | AU146655  | 213027_at   | TROVE domain family, member 2                                                        | Hs.288178 | 6738   | 1   |
| 2.1 | CMTM5     | AI147740  | 230942_at   | CKLF-like MARVEL transmembrane domain containing 5                                   |           |        |     |
| 2.1 | USP12     | AI820101  | 213327_s_at | Ubiquitin specific peptidase 12                                                      | Hs.42400  | 219333 | 13  |
| 2.1 | CHFR      | NM_018223 | 218803_at   | Checkpoint with forkhead and ring finger domains                                     | Hs.656770 | 55743  | 12  |
| 2.1 | NLRX1     | NM_024618 | 219680_at   | NLR family member X1                                                                 | Hs.524082 | 79671  | 11  |
| 2.1 | XPNPEP1   | AF195530  | 209045_at   | X-prolyl aminopeptidase (aminopeptidase P) 1, soluble                                | Hs.390623 | 7511   | 10  |
| 2.1 | TRAPPC2P1 | AF291676  | 209751_s_at | trafficking protein particle complex 2 pseudogene 1                                  | -         | 10597  | -   |
| 2.1 | PANK3     | NM_024594 | 218433_at   | Pantothenate kinase 3                                                                | Hs.591729 | 79646  | 5   |
| 2.1 | UCHL5     | NM_016017 | 220083_x_at | ubiquitin carboxyl-terminal hydrolase L5                                             | -         | 51377  | -   |
| 2.1 | P4HB      | NM_000918 | 200656_s_at | Prolyl 4-hydroxylase, beta polypeptide                                               | Hs.464336 | 5034   | 17  |
| 2.1 | ARHGEF12  | AB002380  | 201334_s_at | Rho guanine nucleotide exchange factor (GEF) 12                                      | Hs.24598  | 23365  | 11  |
| 2.1 | MED21     | AI688580  | 209362_at   | Mediator complex subunit 21                                                          | Hs.286145 | 9412   | 12  |
| 2.1 | ADD3      | BE545756  | 201034_at   | Adducin 3 (gamma)                                                                    | Hs.501012 | 120    | 10  |



## Up-Regulated Transcripts (u133A U133B)

|     |          |           |             |                                                                                         |           |       |    |
|-----|----------|-----------|-------------|-----------------------------------------------------------------------------------------|-----------|-------|----|
| 2.1 | RPS11    | NM_001015 | 200031_s_at | Ribosomal protein S11                                                                   |           |       |    |
| 2.1 | MKKS     | NM_018848 | 218138_at   | McKusick-Kaufman syndrome                                                               | Hs.472119 | 8195  | 20 |
| 2.1 | UTP3     | BC004546  | 209486_at   | UTP3, small subunit (SSU) processome component, homolog (S. cerevisiae)                 | Hs.322901 | 57050 | 4  |
| 2.1 | TM2D1    | AA012917  | 213883_s_at | TM2 domain containing 1                                                                 | Hs.656790 | 83941 | 1  |
| 2.1 | GPX4     | NM_002085 | 201106_at   | Glutathione peroxidase 4 (phospholipid hydroperoxidase)                                 | Hs.433951 | 2879  | 19 |
| 2.1 | MFF      | NM_020194 | 219137_s_at | Mitochondrial fission factor                                                            | Hs.471528 | 56947 | 2  |
| 2.1 | PTTG1    | NM_004219 | 203554_x_at | Pituitary tumor-transforming 1                                                          | Hs.350966 | 9232  | 5  |
| 2.0 | SMAP1    | NM_021940 | 218137_s_at | Small ArfGAP 1                                                                          | Hs.485717 | 60682 | 6  |
| 2.0 | ATP13A2  | NM_022089 | 218608_at   | ATPase type 13A2                                                                        | Hs.128866 | 23400 | 1  |
| 2.0 | RRP8     | NM_015324 | 203171_s_at | Ribosomal RNA processing 8, methyltransferase, homolog (yeast)                          | Hs.652255 | 23378 | 11 |
| 2.0 | ENSA     | BC000436  | 202596_at   | Endosulfine alpha                                                                       | Hs.632456 | 2029  | 1  |
| 2.0 | NMI      | NM_004688 | 203964_at   | N-myc (and STAT) interactor                                                             | Hs.54483  | 9111  | 2  |
| 2.0 | TSG101   | NM_006292 | 201758_at   | Tumor susceptibility gene 101                                                           | Hs.523512 | 7251  | 11 |
| 2.0 | STK10    | NM_005990 | 203047_at   | Serine/threonine kinase 10                                                              | Hs.719134 | 6793  | 5  |
| 2.0 | WDR37    | AL136827  | 211383_s_at | WD repeat domain 37                                                                     | Hs.188495 | 22884 | 10 |
| 2.0 | SMPD1    | M59916    | 209420_s_at | Sphingomyelin phosphodiesterase 1, acid lysosomal                                       | Hs.498173 | 6609  | 11 |
| 2.0 | ERP44    | BC005374  | 208959_s_at | Endoplasmic reticulum protein 44                                                        | Hs.154023 | 23071 | 9  |
| 2.0 | TTC15    | NM_016030 | 203122_at   | Tetratricopeptide repeat domain 15                                                      | Hs.252713 | 51112 | 2  |
| 2.0 | SNRNP27  | BG252325  | 212438_at   | Small nuclear ribonucleoprotein 27kDa (U4/U6.U5)                                        | Hs.54649  | 11017 | 2  |
| 2.0 | MAPKSP1  | NM_021970 | 217971_at   | MAPK scaffold protein 1                                                                 | Hs.716375 | 8649  | 4  |
| 2.0 | COMMD4   | BE313890  | 209132_s_at | COMM domain containing 4                                                                | Hs.351327 | 54939 | 15 |
| 2.0 | C2orf43  | NM_021925 | 219008_at   | Chromosome 2 open reading frame 43                                                      | Hs.187823 | 60526 | 2  |
| 2.0 | ADIPOR2  | NM_024551 | 201346_at   | Adiponectin receptor 2                                                                  | Hs.371642 | 79602 | 12 |
| 2.0 | ENY2     | NM_020189 | 218482_at   | Enhancer of yellow 2 homolog (Drosophila)                                               | Hs.492555 | 56943 | 8  |
| 2.0 | RNF144A  | NM_014746 | 204040_at   | Ring finger protein 144A                                                                | Hs.22146  | 9781  | 2  |
| 2.0 | SULT1A3  | U08032    | 209607_x_at | Sulfotransferase family, cytosolic, 1A, phenol-preferring, member 3                     | Hs.460558 | 6818  | 16 |
| 2.0 | NDUFV2   | NM_021074 | 202941_at   | NADH dehydrogenase (ubiquinone) flavoprotein 2, 24kDa                                   | Hs.464572 | 4729  | 18 |
| 2.0 | PPP1CA   | NM_002708 | 200846_s_at | Protein phosphatase 1, catalytic subunit, alpha isoform                                 | Hs.183994 | 5499  | 11 |
| 2.0 | ARMCX5   | NM_022838 | 219335_at   | Armadillo repeat containing, X-linked 5                                                 | Hs.522729 | 64860 | X  |
| 2.0 | LIG4     | NM_002312 | 206235_at   | Ligase IV, DNA, ATP-dependent                                                           | Hs.166091 | 3981  | 13 |
| 2.0 | TIMM8A   | NM_004085 | 205217_at   | Translocase of inner mitochondrial membrane 8 homolog A (yeast)                         | Hs.447877 | 1678  | X  |
| 2.0 | ARMCX3   | NM_016607 | 217858_s_at | Armadillo repeat containing, X-linked 3                                                 | Hs.592225 | 51566 | X  |
| 2.0 | NUPL2    | NM_007342 | 204003_s_at | Nucleoporin like 2                                                                      | Hs.408241 | 11097 | 7  |
| 2.0 | SYB      | U93305    | 217349_s_at | prickle homolog 3 (Drosophila)                                                          | -         | -     | -  |
| 2.0 | SCAMP3   | NM_005698 | 201771_at   | Secretory carrier membrane protein 3                                                    | Hs.200600 | 10067 | 1  |
| 2.0 | DNAJC12  | NM_021800 | 218976_at   | DnaJ (Hsp40) homolog, subfamily C, member 12                                            | Hs.260720 | 56521 | 10 |
| 2.0 | NAGA     | NM_000262 | 202944_at   | N-acetylgalactosaminidase, alpha-                                                       | Hs.75372  | 4668  | 22 |
| 2.0 | CCL5     | NM_002985 | 204655_at   | Chemokine (C-C motif) ligand 5                                                          | Hs.514821 | 6352  | 17 |
| 2.0 | NDUFS1   | NM_005006 | 203039_s_at | NADH dehydrogenase (ubiquinone) Fe-S protein 1, 75kDa (NADH-coenzyme Q reductase)       | Hs.471207 | 4719  | 2  |
| 2.0 | TTC35    | NM_014673 | 203584_at   | Tetratricopeptide repeat domain 35                                                      | Hs.654351 | 9694  | 8  |
| 2.0 | DCTN3    | NM_007234 | 204246_s_at | Dynactin 3 (p22)                                                                        | Hs.511768 | 11258 | 9  |
| 2.0 | C7orf49  | NM_024033 | 220949_s_at | Chromosome 7 open reading frame 49                                                      | Hs.521213 | 78996 | 7  |
| 2.0 | ELOVL5   | AL136939  | 208788_at   | ELOVL family member 5, elongation of long chain fatty acids (FEN1/Elo2, SUR4/Elo3-like) | Hs.713560 | 60481 | 6  |
| 2.0 | MTHFD2   | NM_006636 | 201761_at   | Methylenetetrahydrofolate dehydrogenase (NADP+ dependent) 2, methylenetetrahydrofolate  | Hs.469030 | 10797 | 2  |
| 2.0 | SLC9A3R1 | NM_004252 | 201349_at   | Solute carrier family 9 (sodium/hydrogen exchanger), member 3 regulator 1               | Hs.711846 | 9368  | 17 |
| 2.0 | SMYD2    | AI809870  | 212922_s_at | SET and MYND domain containing 2                                                        | Hs.66170  | 56950 | 1  |
| 2.0 | YWHAH    | NM_014052 | 217718_s_at | tyrosine 3-monooxygenase/tryptophan 5-monooxygenase activation protein, beta poly       | -         | 7529  | -  |
| 2.0 | SULT1A2  | U28169    | 211385_x_at | Sulfotransferase family, cytosolic, 1A, phenol-preferring, member 2                     | Hs.546304 | 6799  | 16 |
| 2.0 | ACAD8    | BC001964  | 221669_s_at | Acyl-Coenzyme A dehydrogenase family, member 8                                          | Hs.14791  | 27034 | 11 |
| 2.0 | CNOT8    | AF180476  | 202164_s_at | CCR4-NOT transcription complex, subunit 8                                               | Hs.26703  | 9337  | 5  |
| 2.0 | CNDP2    | NM_018235 | 217752_s_at | CNDP dipeptidase 2 (metallopeptidase M20 family)                                        | Hs.149185 | 55748 | 18 |
| 2.0 | CCNT2    | BE674119  | 213743_at   | Transcribed locus                                                                       | Hs.666595 | -     | 2  |
| 2.0 | LEPROT   | AW026535  | 202377_at   | Leptin receptor                                                                         | Hs.655605 | -     | 1  |
| 2.0 | MMD      | NM_012329 | 203414_at   | Monocyte to macrophage differentiation-associated                                       | Hs.463483 | 23531 | 17 |
| 2.0 | TIMM17B  | NM_005834 | 203342_at   | Translocase of inner mitochondrial membrane 17 homolog B (yeast)                        | Hs.30570  | 10245 | X  |
| 2.0 | CYFIP1   | BC005097  | 208923_at   | Cytoplasmic FMR1 interacting protein 1                                                  | Hs.26704  | 23191 | 15 |
| 2.0 | ARPC2    | BG034239  | 213513_x_at | Actin related protein 2/3 complex, subunit 2, 34kDa                                     | Hs.529303 | 10109 | 2  |

## Up-Regulated Transcripts (u133A U133B)

|     |           |           |             |                                                                                   |           |        |    |
|-----|-----------|-----------|-------------|-----------------------------------------------------------------------------------|-----------|--------|----|
| 2.0 | CITED2    | AF109161  | 209357_at   | Cbp/p300-interacting transactivator, with Glu/Asp-rich carboxy-terminal domain, 2 | Hs.82071  | 10370  | 6  |
| 2.0 | PPP4C     | BC001416  | 208932_at   | Protein phosphatase 4 (formerly X), catalytic subunit                             | Hs.534338 | 5531   | 16 |
| 2.0 | GGT1      | NM_013421 | 208284_x_at | gamma-glutamyltransferase 1                                                       | -         | 2678   | -  |
| 2.0 | AKAP9     | AB019691  | 210962_s_at | A kinase (PRKA) anchor protein (yotiao) 9                                         | Hs.651221 | 10142  | 7  |
| 2.0 | SERPIN1   | NM_005025 | 205352_at   | Serpin peptidase inhibitor, clade I (neuroserpin), member 1                       | Hs.478153 | 5274   | 3  |
| 1.9 | MCF2L     | AB002360  | 212935_at   | MCF.2 cell line derived transforming sequence-like                                | Hs.170422 | 23263  | 13 |
| 1.9 | ELF4      | U32645    | 31845_at    | E74-like factor 4 (ets domain transcription factor)                               | Hs.271940 | 2000   | X  |
| 1.9 | ARHGAP25  | D29642    | 38149_at    | Rho GTPase activating protein 25                                                  | Hs.531807 | 9938   | 2  |
| 1.9 | PLOD1     | NM_000302 | 200827_at   | Procollagen-lysine 1, 2-oxoglutarate 5-dioxygenase 1                              | Hs.75093  | 5351   | 1  |
| 1.9 | TYMP      | NM_001953 | 204858_s_at | Thymidine phosphorylase                                                           | Hs.592212 | 1890   | 22 |
| 1.9 | MED20     | AK023092  | 212872_s_at | Mediator complex subunit 20                                                       | Hs.278434 | 9477   | 6  |
| 1.9 | TAGLN2    | NM_003564 | 200916_at   | Transgelin 2                                                                      | Hs.517168 | 8407   | 1  |
| 1.9 | ZNF180    | NM_013256 | 219495_s_at | Zinc finger protein 180                                                           | Hs.22305  | 7733   | 19 |
| 1.9 | SUPT16H   | NM_007192 | 217815_at   | Suppressor of Ty 16 homolog (S. cerevisiae)                                       | Hs.213724 | 11198  | 14 |
| 1.9 | CCT5      | AF275798  | 208696_at   | Chaperonin containing TCP1, subunit 5 (epsilon)                                   | Hs.1600   | 22948  | 5  |
| 1.9 | MYL12B    | U26162    | 221474_at   | Myosin, light chain 12B, regulatory                                               | Hs.464472 | 103910 | 18 |
| 1.9 | NDUFB3    | NM_002491 | 203371_s_at | NADH dehydrogenase (ubiquinone) 1 beta subcomplex, 3, 12kDa                       | Hs.109760 | 4709   | 2  |
| 1.9 | SV2A      | NM_014849 | 203069_at   | Synaptic vesicle glycoprotein 2A                                                  | Hs.516153 | 9900   | 1  |
| 1.9 | ANKMY2    | AK001389  | 212798_s_at | Ankyrin repeat and MYND domain containing 2                                       | Hs.157378 | 57037  | 7  |
| 1.9 | DYNLRB1   | NM_014183 | 217918_at   | Dynein, light chain, roadblock-type 1                                             | Hs.593920 | 83658  | 20 |
| 1.9 | UBR2      | AB002347  | 212760_at   | Ubiquitin protein ligase E3 component n-recogin 2                                 | Hs.529925 | 23304  | 6  |
| 1.9 | GLYR1     | NM_018459 | 218506_x_at | glyoxylate reductase 1 homolog (Arabidopsis)                                      | -         | 84656  | -  |
| 1.9 | GNS       | BE880245  | 212334_at   | Transcribed locus                                                                 | Hs.682295 | -      | 12 |
| 1.9 | NDUFAF3   | BC002873  | 209177_at   | NADH dehydrogenase (ubiquinone) 1 alpha subcomplex, assembly factor 3             | Hs.31387  | 25915  | 3  |
| 1.9 | STRN4     | NM_013403 | 217903_at   | Striatin, calmodulin binding protein 4                                            | Hs.631590 | 29888  | 19 |
| 1.9 | BRD7      | AI885109  | 221776_s_at | Bromodomain containing 7                                                          | Hs.437894 | 29117  | 16 |
| 1.9 | TUBG1     | NM_001070 | 201714_at   | Tubulin, gamma 1                                                                  | Hs.279669 | 7283   | 17 |
| 1.9 | GOSR1     | AI741876  | 213021_at   | Golgi SNAP receptor complex member 1                                              | Hs.462680 | 9527   | 17 |
| 1.9 | ACTR2     | BE566290  | 200728_at   | ARP2 actin-related protein 2 homolog (yeast)                                      | -         | -      | -  |
| 1.9 | IL10RB    | BC001903  | 209575_at   | Interleukin 10 receptor, beta                                                     | Hs.654593 | 3588   | 21 |
| 1.9 | MYL6      | BE734356  | 212082_s_at | Myosin, light chain 6, alkali, smooth muscle and non-muscle                       | Hs.632717 | 4637   | 12 |
| 1.9 | KIDINS220 | AB033076  | 212163_at   | Kinase D-interacting substrate, 220kDa                                            | Hs.9873   | 57498  | 2  |
| 1.9 | COPG      | NM_016128 | 217749_at   | Coatomer protein complex, subunit gamma                                           | Hs.518250 | 22820  | 3  |
| 1.9 | TMEM9B    | NM_020644 | 218065_s_at | TMEM9 domain family, member B                                                     | Hs.501853 | 56674  | 11 |
| 1.9 | PPP1R10   | NM_002714 | 201703_s_at | Protein phosphatase 1, regulatory (inhibitor) subunit 10                          | Hs.106019 | 5514   | 6  |
| 1.9 | PITPNB    | AL031591  | 202522_at   | phosphatidylinositol transfer protein, beta                                       | -         | -      | -  |
| 1.9 | XRCC1     | NM_006297 | 203655_at   | X-ray repair complementing defective repair in Chinese hamster cells 1            | Hs.98493  | 7515   | 19 |
| 1.9 | SLC7A1    | AA148507  | 212295_s_at | Solute carrier family 7 (cationic amino acid transporter, y+ system), member 1    | Hs.14846  | 6541   | 13 |
| 1.9 | SPDEF     | NM_012391 | 220192_x_at | SAM pointed domain containing ets transcription factor                            | Hs.485158 | 25803  | 6  |
| 1.9 | RER1      | AF157324  | 202297_s_at | RER1 retention in endoplasmic reticulum 1 homolog (S. cerevisiae)                 | Hs.719104 | 11079  | 1  |
| 1.9 | PGRMC2    | BE879873  | 213227_at   | Progesterone receptor membrane component 2                                        | Hs.507910 | 10424  | 4  |
| 1.9 | MYO1F     | BF740152  | 213733_at   | Myosin 1F                                                                         | Hs.465818 | 4542   | 19 |
| 1.9 | RTN4      | AB015639  | 211509_s_at | Reticulon 4                                                                       | Hs.704007 | 57142  | 2  |
| 1.9 | EDEM1     | NM_014674 | 203279_at   | ER degradation enhancer, mannosidase alpha-like 1                                 | Hs.224616 | 9695   | 3  |
| 1.9 | MADD      | AB002356  | 210252_s_at | MAP-kinase activating death domain                                                | Hs.82548  | 8567   | 11 |
| 1.9 | CTNNA1    | NM_001903 | 200765_x_at | Catenin (cadherin-associated protein), alpha 1, 102kDa                            | Hs.534797 | 1495   | 5  |
| 1.9 | SLC25A11  | NM_003562 | 207088_s_at | Solute carrier family 25 (mitochondrial carrier; oxoglutarate carrier), member 11 | Hs.706792 | 8402   | 17 |
| 1.9 | NEK7      | AL080111  | 212530_at   | NIMA (never in mitosis gene a)-related kinase 7                                   | Hs.24119  | 140609 | 1  |
| 1.9 | TRIM24    | NM_015905 | 204391_x_at | Tripartite motif-containing 24                                                    | Hs.490287 | 8805   | 7  |
| 1.9 | RHEB      | BF033683  | 213404_s_at | Ras homolog enriched in brain                                                     | -         | -      | -  |
| 1.9 | SEP11     | AL534972  | 201307_at   | Septin 11                                                                         | Hs.128199 | 55752  | 4  |
| 1.9 | TRAM1     | BC000687  | 201398_s_at | Translocation associated membrane protein 1                                       | Hs.491988 | 23471  | 8  |
| 1.9 | RMND5B    | NM_022762 | 218262_at   | Required for meiotic nuclear division 5 homolog B (S. cerevisiae)                 | Hs.716508 | 64777  | 5  |
| 1.9 | ACTBL3    | AY014272  | 210926_at   | Actin, beta-like 3                                                                | Hs.631267 | 440915 | 2  |
| 1.9 | STAMPB    | NM_006463 | 202811_at   | STAM binding protein                                                              | Hs.469018 | 10617  | 2  |
| 1.9 | NUP50     | AF267865  | 218294_s_at | Nucleoporin 50kDa                                                                 | Hs.715672 | 10762  | 22 |
| 1.9 | MEA1      | NM_014623 | 218061_at   | Male-enhanced antigen 1                                                           | Hs.278362 | 4201   | 6  |

## Up-Regulated Transcripts (u133A U133B)

|     |          |           |             |                                                                           |           |       |    |
|-----|----------|-----------|-------------|---------------------------------------------------------------------------|-----------|-------|----|
| 1.9 | TFPT     | NM_013342 | 218996_at   | TCF3 (E2A) fusion partner (in childhood Leukemia)                         | Hs.590939 | 29844 | 19 |
| 1.9 | NUDT4    | AF191654  | 212181_s_at | Nudix (nucleoside diphosphate linked moiety X)-type motif 4               | Hs.506325 | 11163 | 12 |
| 1.9 | RHOBTB3  | NM_014899 | 202976_s_at | Rho-related BTB domain containing 3                                       | Hs.445030 | 22836 | 5  |
| 1.9 | HIF1AN   | W37897    | 59999_at    | Transcribed locus                                                         | Hs.700958 | -     | 10 |
| 1.9 | NSF      | NM_006178 | 202395_at   | N-ethylmaleimide-sensitive factor                                         | Hs.431279 | 4905  | 17 |
| 1.9 | KDEL2    | BE962456  | 200699_at   | KDEL (Lys-Asp-Glu-Leu) endoplasmic reticulum protein retention receptor 2 | -         | -     | -  |
| 1.9 | AP152    | NM_003916 | 203300_x_at | Adaptor-related protein complex 1, sigma 2 subunit                        | Hs.656471 | 8905  | X  |
| 1.9 | CUL5     | BF435809  | 203531_at   | Cullin 5                                                                  | Hs.440320 | 8065  | 11 |
| 1.9 | PYGL     | NM_002863 | 202990_at   | Phosphorylase, glycogen, liver                                            | Hs.282417 | 5836  | 14 |
| 1.9 | GOLGB1   | N53479    | 201056_at   | Golgin B1, golgi integral membrane protein                                | Hs.213389 | 2804  | 3  |
| 1.9 | METTL3   | BC001650  | 209265_s_at | Methyltransferase like 3                                                  | Hs.168799 | 56339 | 14 |
| 1.9 | SPINT2   | AF027205  | 210715_s_at | Serine peptidase inhibitor, Kunitz type, 2                                | Hs.31439  | 10653 | 19 |
| 1.9 | CREB1    | NM_004379 | 204314_s_at | CAMP responsive element binding protein 1                                 | Hs.516646 | 1385  | 2  |
| 1.9 | SSFA2    | NM_006751 | 202506_at   | Sperm specific antigen 2                                                  | Hs.591602 | 6744  | 2  |
| 1.9 | C17orf71 | NM_018149 | 218514_at   | Chromosome 17 open reading frame 71                                       | Hs.7296   | 55181 | 17 |
| 1.9 | TMF1     | AL050136  | 214948_s_at | MRNA; cDNA DKFZp586L141 (from clone DKFZp586L141)                         | Hs.706113 | -     | 8  |
| 1.9 | NFU1     | NM_015700 | 218946_at   | NFU1 iron-sulfur cluster scaffold homolog (S. cerevisiae)                 | Hs.430439 | 27247 | 2  |
| 1.9 | NDUFA4L2 | AW190316  | 214096_s_at | NADH dehydrogenase (ubiquinone) 1 alpha subcomplex, 4-like 2              | Hs.75069  | 56901 | 12 |
| 1.9 | CCDC28A  | BC000758  | 209479_at   | Coiled-coil domain containing 28A                                         | Hs.412019 | 25901 | 6  |
| 1.9 | ARF3     | NM_001659 | 200011_s_at | ADP-ribosylation factor 3                                                 | Hs.119177 | 377   | 12 |
| 1.9 | TMEM214  | NM_017727 | 217899_at   | Transmembrane protein 214                                                 | Hs.533934 | 54867 | 2  |
| 1.9 | PTBP1    | BC004383  | 211271_x_at | Polypyrimidine tract binding protein 1                                    | Hs.172550 | 5725  | 19 |
| 1.9 | KIF3C    | AF035621  | 203389_at   | Kinesin family member 3C                                                  | Hs.21611  | 3797  | 2  |
| 1.9 | STX7     | N32035    | 212632_at   | Syntaxin 7                                                                | Hs.593148 | 8417  | 6  |
| 1.9 | PSMA6    | BC002979  | 208805_at   | Proteasome (prosome, macropain) subunit, alpha type, 6                    | Hs.446260 | 5687  | 14 |
| 1.9 | DOLK     | NM_014908 | 204488_at   | Dolichol kinase                                                           | Hs.531563 | 22845 | 9  |
| 1.9 | MEIS1    | NM_002398 | 204069_at   | Meis homeobox 1                                                           | Hs.526754 | 4211  | 2  |
| 1.9 | USP33    | AB029020  | 212513_s_at | Ubiquitin specific peptidase 33                                           | Hs.719202 | 23032 | 1  |
| 1.9 | BNIP3    | U15174    | 201848_s_at | BCL2/adenovirus E1B 19kDa interacting protein 3                           | -         | 664   | -  |
| 1.8 | PPME1    | NM_016147 | 217841_s_at | Protein phosphatase methylesterase 1                                      | Hs.503251 | 51400 | 11 |
| 1.8 | FBXO28   | AB007952  | 202271_at   | F-box protein 28                                                          | Hs.64691  | 23219 | 1  |
| 1.8 | BRE      | AL566299  | 212645_x_at | Brain and reproductive organ-expressed (TNFRSF1A modulator)               | Hs.258314 | 9577  | 2  |
| 1.8 | TIA1     | H96549    | 201447_at   | TIA1 cytotoxic granule-associated RNA binding protein                     | Hs.413123 | 7072  | 2  |
| 1.8 | CHMP7    | BC004344  | 212313_at   | CHMP family, member 7                                                     | Hs.5019   | 91782 | 8  |
| 1.8 | INTS5    | BF446693  | 221818_at   | Integrator complex subunit 5                                              | Hs.458390 | 80789 | 11 |
| 1.8 | GSS      | L42531    | 211630_s_at | glutathione synthetase                                                    | -         | -     | -  |
| 1.8 | UROD     | M14016    | 208970_s_at | Uroporphyrinogen decarboxylase                                            | Hs.78601  | 7389  | 1  |
| 1.8 | TCF12    | AL559478  | 208986_at   | Transcription factor 12                                                   | Hs.511504 | 6938  | 15 |
| 1.8 | PUM2     | D87078    | 216221_s_at | Pumilio homolog 2 (Drosophila)                                            | Hs.467824 | 23369 | 2  |
| 1.8 | FASTKD3  | NM_024091 | 219200_at   | FAST kinase domains 3                                                     | Hs.653162 | 79072 | 5  |
| 1.8 | CASP3    | NM_004346 | 202763_at   | Caspase 3, apoptosis-related cysteine peptidase                           | Hs.141125 | 836   | 4  |
| 1.8 | TRIM21   | NM_003141 | 204804_at   | Tripartite motif-containing 21                                            | Hs.532357 | 6737  | 11 |
| 1.8 | BECN1    | AF139131  | 208946_s_at | Beclin 1, autophagy related                                               | Hs.716464 | 8678  | 17 |
| 1.8 | CCDC51   | NM_024661 | 218722_s_at | Coiled-coil domain containing 51                                          | Hs.187657 | 79714 | 3  |
| 1.8 | TRAPPC2  | NM_014563 | 219351_at   | Trafficking protein particle complex 2                                    | Hs.592238 | 6399  | X  |
| 1.8 | CYB561D2 | AF040704  | 209665_at   | Cytochrome b-561 domain containing 2                                      | Hs.149443 | 11068 | 3  |
| 1.8 | RNF4     | BF968633  | 212696_s_at | Ring finger protein 4                                                     | Hs.66394  | 6047  | 4  |
| 1.8 | LYN      | AI356412  | 202625_at   | V-yes-1 Yamaguchi sarcoma viral related oncogene homolog                  | Hs.699154 | 4067  | 8  |
| 1.8 | GOLGA7   | NM_016099 | 217819_at   | Golgi autoantigen, golgin subfamily a, 7                                  | Hs.654773 | 51125 | 8  |
| 1.8 | GHITM    | AF131820  | 209249_s_at | Growth hormone inducible transmembrane protein                            | Hs.352656 | 27069 | 10 |
| 1.8 | RHOG     | NM_001665 | 203175_at   | Ras homolog gene family, member G (rho G)                                 | Hs.501728 | 391   | 11 |
| 1.8 | ABHD6    | BC001698  | 221552_at   | Abhydrolase domain containing 6                                           | Hs.476454 | 57406 | 3  |
| 1.8 | THEM2    | NM_018473 | 204565_at   | Thioesterase superfamily member 2                                         | Hs.9676   | 55856 | 6  |
| 1.8 | C14orf2  | AF116639  | 210532_s_at | Chromosome 14 open reading frame 2                                        | Hs.109052 | 9556  | 14 |
| 1.8 | KLHL20   | AA808694  | 204176_at   | Kelch-like 20 (Drosophila)                                                | Hs.495035 | 27252 | 1  |
| 1.8 | EXO1     | NM_003686 | 204603_at   | Exonuclease 1                                                             | Hs.498248 | 9156  | 1  |
| 1.8 | GAPVD1   | AK023841  | 212802_s_at | GTPase activating protein and VPS9 domains 1                              | Hs.495134 | 26130 | 9  |

## Up-Regulated Transcripts (u133A U133B)

|     |          |           |             |                                                                                   |           |       |    |
|-----|----------|-----------|-------------|-----------------------------------------------------------------------------------|-----------|-------|----|
| 1.8 | MLH1     | NM_000249 | 202520_s_at | MutL homolog 1, colon cancer, nonpolyposis type 2 (E. coli)                       | Hs.195364 | 4292  | 3  |
| 1.8 | SEMA4D   | NM_006378 | 203528_at   | Sema domain, immunoglobulin domain (Ig), transmembrane domain (TM) and short cyto | Hs.494406 | 10507 | 9  |
| 1.8 | DBP      | AA485440  | 40273_at    | D site of albumin promoter (albumin D-box) binding protein                        | Hs.528006 | 1628  | 19 |
| 1.8 | GINS3    | NM_022770 | 218719_s_at | GINS complex subunit 3 (Psf3 homolog)                                             | Hs.47125  | 64785 | 16 |
| 1.8 | ZNF638   | AI357871  | 213775_x_at | Zinc finger protein 638                                                           | Hs.434401 | 27332 | 2  |
| 1.8 | HMGCL    | NM_000191 | 202772_at   | 3-hydroxymethyl-3-methylglutaryl-Coenzyme A lyase                                 | Hs.533444 | 3155  | 1  |
| 1.8 | NFYA     | AL031778  | 204108_at   | nuclear transcription factor Y, alpha                                             | -         | -     | -  |
| 1.8 | MAN1A2   | BE543064  | 217921_at   | Mannosidase, alpha, class 1A, member 2                                            | Hs.435938 | 10905 | 1  |
| 1.8 | SARS     | NM_006513 | 200802_at   | Seryl-tRNA synthetase                                                             | Hs.531176 | 6301  | 1  |
| 1.8 | PIK3R3   | AF028785  | 211580_s_at | Phosphoinositide-3-kinase, regulatory subunit 3 (gamma)                           | Hs.655387 | 8503  | 1  |
| 1.8 | AP1G1    | NM_001128 | 203350_at   | Adaptor-related protein complex 1, gamma 1 subunit                                | Hs.461253 | 164   | 16 |
| 1.8 | ITRAP    | NM_016614 | 202266_at   | TRAF and TNF receptor associated protein                                          | Hs.716397 | 51567 | 6  |
| 1.8 | CALM2    | NM_001743 | 207243_s_at | Calmodulin 2 (phosphorylase kinase, delta)                                        | Hs.468442 | 805   | 2  |
| 1.8 | UBE2Q1   | NM_017582 | 217978_s_at | Ubiquitin-conjugating enzyme E2Q family member 1                                  | Hs.607928 | 55585 | 1  |
| 1.8 | SPHAR    | NM_006542 | 206272_at   | S-phase response (cyclin related)                                                 | Hs.716553 | 10638 | 1  |
| 1.8 | SON      | X63071    | 214988_s_at | SON DNA binding protein                                                           | Hs.517262 | 6651  | 21 |
| 1.8 | PPP1R12A | BE737620  | 201602_s_at | Protein phosphatase 1, regulatory (inhibitor) subunit 12A                         | Hs.49582  | 4659  | 12 |
| 1.8 | ABCA7    | NM_019112 | 219577_s_at | ATP-binding cassette, sub-family A (ABC1), member 7                               | Hs.134514 | 10347 | 19 |
| 1.8 | MFSD5    | BF690150  | 212861_at   | Major facilitator superfamily domain containing 5                                 | Hs.654660 | 84975 | 12 |
| 1.8 | DNAJC16  | AK022530  | 212908_at   | Dnaj (Hsp40) homolog, subfamily C, member 16                                      | Hs.655410 | 23341 | 1  |
| 1.8 | MLEC     | NM_014730 | 200617_at   | Malectin                                                                          | Hs.714322 | 9761  | 12 |
| 1.8 | SEC61B   | NM_006808 | 203133_at   | Sec61 beta subunit                                                                | Hs.191887 | 10952 | 9  |
| 1.8 | POP7     | BC001430  | 209482_at   | Processing of precursor 7, ribonuclease P/MRP subunit (S. cerevisiae)             | Hs.416994 | 10248 | 7  |
| 1.8 | MAT2A    | BC001686  | 200768_s_at | Methionine adenosyltransferase II, alpha                                          | Hs.516157 | 4144  | 2  |
| 1.8 | MCFD2    | AL567779  | 212245_at   | Multiple coagulation factor deficiency 2                                          | Hs.293689 | 90411 | 2  |
| 1.8 | PFN1     | NM_005022 | 200634_at   | Profilin 1                                                                        | Hs.494661 | 5216  | 17 |
| 1.8 | SAP30L   | NM_024632 | 219129_s_at | SAP30-like                                                                        | Hs.592566 | 79685 | 5  |
| 1.8 | TTC31    | NM_022492 | 218838_s_at | Tetratricopeptide repeat domain 31                                                | Hs.557709 | 64427 | 2  |
| 1.8 | USO1     | NM_003715 | 201832_s_at | USO1 homolog, vesicle docking protein (yeast)                                     | Hs.292689 | 8615  | 4  |
| 1.8 | KEAP1    | NM_012289 | 202417_at   | Kelch-like ECH-associated protein 1                                               | Hs.465870 | 9817  | 19 |
| 1.8 | FBXO34   | NM_017943 | 218539_at   | F-box protein 34                                                                  | Hs.525348 | 55030 | 14 |
| 1.8 | RRAGC    | NM_022157 | 218088_s_at | Ras-related GTP binding C                                                         | Hs.532461 | 64121 | 1  |
| 1.8 | PREB     | NM_013388 | 217861_s_at | Prolactin regulatory element binding                                              | Hs.279784 | 10113 | 2  |
| 1.8 | WIPF1    | AW058622  | 202664_at   | WAS/WASL interacting protein family, member 1                                     | Hs.128067 | 7456  | 2  |
| 1.8 | TAF10    | NM_006284 | 200055_at   | TAF10 RNA polymerase II, TATA box binding protein (TBP)-associated factor, 30kDa  | Hs.5158   | 6881  | 11 |
| 1.8 | MAVS     | NM_024030 | 220305_at   | mitochondrial antiviral signaling protein                                         | -         | -     | -  |
| 1.8 | KIAA1539 | NM_025182 | 207765_s_at | KIAA1539                                                                          | Hs.301696 | 80256 | 9  |
| 1.8 | TSFM     | AF110399  | 212656_at   | Ts translation elongation factor, mitochondrial                                   | Hs.632704 | 10102 | 12 |
| 1.8 | MRPL34   | AB049652  | 221692_s_at | Mitochondrial ribosomal protein L34                                               | Hs.515242 | 64981 | 19 |
| 1.8 | TAX1BP1  | AF090891  | 200977_s_at | Tax1 (human T-cell leukemia virus type I) binding protein 1                       | Hs.34576  | 8887  | 7  |
| 1.7 | C1orf77  | NM_015607 | 202560_s_at | Chromosome 1 open reading frame 77                                                | Hs.716398 | 26097 | 1  |
| 1.7 | C1orf43  | BC000152  | 223034_s_at | Chromosome 1 open reading frame 43                                                |           |       |    |
| 1.7 | CLIC1    | AF034607  | 208659_at   | Chloride intracellular channel 1                                                  | Hs.414565 | 1192  | 6  |
| 1.7 | JAK1     | AL039831  | 201648_at   | Janus kinase 1 (a protein tyrosine kinase)                                        | Hs.207538 | 3716  | 1  |
| 1.7 | DNAJB9   | NM_012328 | 202843_at   | Dnaj (Hsp40) homolog, subfamily B, member 9                                       | Hs.6790   | 4189  | 7  |
| 1.7 | ATG5     | AF293841  | 210639_s_at | ATG5 autophagy related 5 homolog (S. cerevisiae)                                  | Hs.486063 | 9474  | 6  |
| 1.7 | HSPA4    | AB023420  | 208815_x_at | Heat shock 70kDa protein 4                                                        | Hs.90093  | 3308  | 5  |
| 1.7 | TNS1     | AL046979  | 221748_s_at | Tensin 1                                                                          | Hs.471381 | 7145  | 2  |
| 1.7 | TM9SF1   | BE899402  | 209149_s_at | Transmembrane 9 superfamily member 1                                              | Hs.91586  | 10548 | 14 |
| 1.7 | AKAP11   | NM_016248 | 203156_at   | A kinase (PRKA) anchor protein 11                                                 | Hs.105105 | 11215 | 13 |
| 1.7 | HMGB3    | NM_005342 | 203744_at   | High-mobility group box 3                                                         | Hs.19114  | 3149  | X  |
| 1.7 | MTDH     | AV700332  | 212250_at   | Metadherin                                                                        | Hs.377155 | 92140 | 8  |
| 1.7 | SSH1     | AL041728  | 221752_at   | Slingshot homolog 1 (Drosophila)                                                  | Hs.199763 | 54434 | 12 |
| 1.7 | TOR1A    | BC000674  | 202348_s_at | Torsin family 1, member A (torsin A)                                              | Hs.534312 | 1861  | 9  |
| 1.7 | KRCC1    | NM_016618 | 218303_x_at | Lysine-rich coiled-coil 1                                                         | Hs.469254 | 51315 | 2  |
| 1.7 | PTPRA    | AL121905  | 213795_s_at | protein tyrosine phosphatase, receptor type, A                                    | -         | -     | -  |
| 1.7 | STK17A   | AW194730  | 202693_s_at | MRNA; cDNA DKFZp686P05119 (from clone DKFZp686P05119)                             | Hs.268887 | -     | 7  |

## Up-Regulated Transcripts (u133A U133B)

|     |          |           |             |                                                                          |           |        |    |
|-----|----------|-----------|-------------|--------------------------------------------------------------------------|-----------|--------|----|
| 1.7 | CARS     | NM_001751 | 202402_s_at | CysteinyI-tRNA synthetase                                                | Hs.274873 | 833    | 11 |
| 1.7 | KLHDC3   | BC001793  | 208784_s_at | Kelch domain containing 3                                                | Hs.412468 | 116138 | 6  |
| 1.7 | AQR      | BG260519  | 212584_at   | Aquarius homolog (mouse)                                                 | Hs.510958 | 9716   | 15 |
| 1.7 | RAB7A    | AK000826  | 211961_s_at | RAB7A, member RAS oncogene family                                        | -         | 7879   | -  |
| 1.7 | SEP7     | AU157515  | 213151_s_at | Septin 7                                                                 | Hs.191346 | 989    | 7  |
| 1.7 | WIPF2    | AK026913  | 212050_at   | WAS/WASL interacting protein family, member 2                            | Hs.421622 | 147179 | 17 |
| 1.7 | LSM1     | NM_014462 | 203534_at   | LSM1 homolog, U6 small nuclear RNA associated ( <i>S. cerevisiae</i> )   | Hs.425311 | 27257  | 8  |
| 1.7 | ARPC1A   | NM_006409 | 200950_at   | Actin related protein 2/3 complex, subunit 1A, 41kDa                     | Hs.124126 | 10552  | 7  |
| 1.7 | ZNF174   | NM_003450 | 205252_at   | Zinc finger protein 174                                                  | Hs.155204 | 7727   | 16 |
| 1.7 | TIMM8B   | NM_012459 | 218357_s_at | Translocase of inner mitochondrial membrane 8 homolog B (yeast)          | Hs.279915 | 26521  | 11 |
| 1.7 | PDIA4    | BC000425  | 208658_at   | Protein disulfide isomerase family A, member 4                           | Hs.93659  | 9601   | 7  |
| 1.7 | RDX      | AL137751  | 212397_at   | radixin                                                                  | -         | -      | -  |
| 1.7 | NOL8     | NM_017948 | 218244_at   | Nucleolar protein 8                                                      | Hs.442199 | 55035  | 9  |
| 1.7 | ANO6     | AL041280  | 224906_at   | Anoctamin 6                                                              |           |        |    |
| 1.7 | YARS     | AW245400  | 212048_s_at | Tyrosyl-tRNA synthetase                                                  | Hs.706890 | 8565   | 1  |
| 1.7 | MARS     | NM_004990 | 201475_x_at | Methionyl-tRNA synthetase                                                | Hs.632707 | 4141   | 12 |
| 1.7 | RABIF    | U74324    | 204477_at   | RAB interacting factor                                                   | Hs.90875  | 5877   | 1  |
| 1.7 | PRPSAP2  | NM_002767 | 203537_at   | Phosphoribosyl pyrophosphate synthetase-associated protein 2             | Hs.632236 | 5636   | 17 |
| 1.7 | EIF5B    | NM_015904 | 201027_s_at | Eukaryotic translation initiation factor 5B                              | Hs.158688 | 9669   | 2  |
| 1.7 | METAP1   | D42084    | 212673_at   | Methionyl aminopeptidase 1                                               | Hs.480364 | 23173  | 4  |
| 1.7 | ATP8A1   | AI769688  | 213106_at   | ATPase, aminophospholipid transporter (APLT), class I, type 8A, member 1 | Hs.435052 | 10396  | 4  |
| 1.7 | WNK1     | AI742553  | 211994_at   | WNK lysine deficient protein kinase 1                                    | Hs.709894 | 65125  | 12 |
| 1.7 | CACYBP   | BC005975  | 211761_s_at | Calcyclin binding protein                                                | Hs.508524 | 27101  | 1  |
| 1.7 | C4orf27  | NM_017867 | 218646_at   | Chromosome 4 open reading frame 27                                       | Hs.406756 | 54969  | 4  |
| 1.7 | PSMC1    | NM_002802 | 204219_s_at | Proteasome (prosome, macropain) 26S subunit, ATPase, 1                   | Hs.356654 | 5700   | 14 |
| 1.7 | ICMT     | NM_012405 | 201611_s_at | Isoprenylcysteine carboxyl methyltransferase                             | Hs.515688 | 23463  | 1  |
| 1.7 | KCNE3    | AI692703  | 227647_at   | Potassium voltage-gated channel, Isk-related family, member 3            |           |        |    |
| 1.7 | SCCPDH   | NM_016002 | 201826_s_at | Saccharopine dehydrogenase (putative)                                    | Hs.498397 | 51097  | 1  |
| 1.7 | CCNG1    | BC000196  | 208796_s_at | Cyclin G1                                                                | Hs.79101  | 900    | 5  |
| 1.7 | MTRF1    | BF214329  | 203207_s_at | mitochondrial fission regulator 1                                        | -         | -      | -  |
| 1.7 | FAM178A  | AI655902  | 203481_at   | Family with sequence similarity 178, member A                            | Hs.447458 | 55719  | 10 |
| 1.7 | HHEX     | Z21533    | 215933_s_at | Hematopoietically expressed homeobox                                     | Hs.118651 | 3087   | 10 |
| 1.7 | ARF1     | AF052179  | 200065_s_at | ADP-ribosylation factor 1                                                | Hs.286221 | 375    | 1  |
| 1.7 | CLN5     | AI911687  | 204084_s_at | Ceroid-lipofuscinosis, neuronal 5                                        | Hs.30213  | 1203   | 13 |
| 1.7 | ERGIC2   | NM_016570 | 218135_at   | ERGIC and golgi 2                                                        | Hs.339453 | 51290  | 12 |
| 1.6 | CNOT1    | BC000779  | 200860_s_at | CCR4-NOT transcription complex, subunit 1                                | Hs.716474 | 23019  | 16 |
| 1.6 | COX7A2   | NM_001865 | 201597_at   | Cytochrome c oxidase subunit VIIa polypeptide 2 (liver)                  | Hs.70312  | 1347   | 6  |
| 1.6 | KLHDC10  | AF277175  | 210111_s_at | Kelch domain containing 10                                               | Hs.520710 | 23008  | 7  |
| 1.6 | CCNG2    | AW134535  | 202769_at   | Cyclin G2                                                                | Hs.13291  | 901    | 4  |
| 1.6 | RIOK3    | NM_003831 | 202131_s_at | RIO kinase 3 (yeast)                                                     | Hs.719109 | 8780   | 18 |
| 1.6 | AP2S1    | NM_004069 | 202120_x_at | Adaptor-related protein complex 2, sigma 1 subunit                       | Hs.119591 | 1175   | 19 |
| 1.6 | C6orf120 | BF197222  | 221786_at   | Chromosome 6 open reading frame 120                                      | Hs.591375 | 387263 | 6  |
| 1.6 | TSPAN31  | NM_005981 | 203227_s_at | Tetraspanin 31                                                           | Hs.632708 | 6302   | 12 |
| 1.6 | ZNF267   | AU150728  | 219540_at   | zinc finger 267                                                          | Hs.613692 | -      | 16 |
| 1.6 | URG4     | NM_017920 | 218601_at   | Up-regulated gene 4                                                      | Hs.709317 | 55665  | 7  |
| 1.6 | MR1      | AF031469  | 210224_at   | Major histocompatibility complex, class I-related                        | Hs.101840 | 3140   | 1  |
| 1.6 | TIAM1    | U90902    | 213135_at   | T-cell lymphoma invasion and metastasis 1                                | Hs.517228 | 7074   | 21 |
| 1.6 | DOK3     | BC004564  | 223553_s_at | Docking protein 3                                                        |           |        |    |
| 1.6 | GYS1     | NM_002103 | 201673_s_at | Glycogen synthase 1 (muscle)                                             | Hs.386225 | 2997   | 19 |
| 1.6 | CDK19    | AI738802  | 212897_at   | Transcribed locus                                                        | Hs.584867 | -      | 6  |
| 1.6 | ETS2     | AL575509  | 201328_at   | V-ets erythroblastosis virus E26 oncogene homolog 2 (avian)              | Hs.644231 | 2114   | 21 |
| 1.6 | USP4     | AI346043  | 202681_at   | Transcribed locus                                                        | Hs.714416 | -      | 3  |
| 1.6 | ELP4     | NM_019040 | 203829_at   | Elongation protein 4 homolog ( <i>S. cerevisiae</i> )                    | Hs.175534 | 26610  | 11 |
| 1.6 | CTNND1   | NM_001331 | 208407_s_at | Catenin (cadherin-associated protein), delta 1                           | Hs.166011 | 1500   | 11 |
| 1.6 | SPAG7    | NM_004890 | 200053_at   | Sperm associated antigen 7                                               | Hs.90436  | 9552   | 17 |
| 1.6 | ACOX1    | S69189    | 209600_s_at | Acyl-Coenzyme A oxidase 1, palmitoyl                                     | Hs.464137 | 51     | 17 |
| 1.6 | TRIP10   | NM_004240 | 202734_at   | Thyroid hormone receptor interactor 10                                   | Hs.515094 | 9322   | 19 |

## Up-Regulated Transcripts (u133A U133B)

|     |              |           |             |                                                                                         |           |           |    |
|-----|--------------|-----------|-------------|-----------------------------------------------------------------------------------------|-----------|-----------|----|
| 1.6 | COG4         | AK022874  | 212189_s_at | Component of oligomeric golgi complex 4                                                 | Hs.208680 | 25839     | 16 |
| 1.6 | CDC25B       | NM_021873 | 201853_s_at | Cell division cycle 25 homolog B (S. pombe)                                             | Hs.153752 | 994       | 20 |
| 1.6 | ACTR1A       | NM_005736 | 200721_s_at | ARP1 actin-related protein 1 homolog A, cetractin alpha (yeast)                         | Hs.153961 | 10121     | 10 |
| 1.6 | TRAK2        | NM_015049 | 202125_s_at | Trafficking protein, kinesin binding 2                                                  | Hs.152774 | 66008     | 2  |
| 1.6 | EIF2AK1      | AW007368  | 217735_s_at | Eukaryotic translation initiation factor 2-alpha kinase 1                               | Hs.719136 | 27102     | 7  |
| 1.6 | PSMD2        | NM_002808 | 200830_at   | Proteasome (prosome, macropain) 26S subunit, non-ATPase, 2                              | Hs.518464 | 5708      | 3  |
| 1.6 | ME2          | M55905    | 210153_s_at | Malic enzyme 2, NAD(+)-dependent, mitochondrial                                         | Hs.233119 | 4200      | 18 |
| 1.6 | TFG          | NM_006070 | 217839_at   | TRK-fused gene                                                                          | Hs.518123 | 10342     | 3  |
| 1.6 | SIP1         | AB037703  | 211115_x_at | Survival of motor neuron protein interacting protein 1                                  | Hs.708127 | 8487      | 14 |
| 1.6 | NUP85        | NM_024844 | 218014_at   | Nucleoporin 85kDa                                                                       | Hs.362817 | 79902     | 17 |
| 1.6 | NDUFAF1      | NM_016013 | 204125_at   | NADH dehydrogenase (ubiquinone) 1 alpha subcomplex, assembly factor 1                   | Hs.106529 | 51103     | 15 |
| 1.6 | SLC1A4       | AI889380  | 212811_x_at | Solute carrier family 1 (glutamate/neutral amino acid transporter), member 4            | Hs.654352 | 6509      | 2  |
| 1.6 | LARP1        | AV746402  | 212137_at   | La ribonucleoprotein domain family, member 1                                            | Hs.292078 | 23367     | 5  |
| 1.6 | USP47        | BE966019  | 221518_s_at | ubiquitin specific peptidase 47                                                         | -         | -         | -  |
| 1.6 | BRD8         | NM_006696 | 202227_s_at | Bromodomain containing 8                                                                | Hs.519337 | 10902     | 5  |
| 1.6 | HTRA2        | AF184911  | 211152_s_at | HtrA serine peptidase 2                                                                 | Hs.716372 | 27429     | 2  |
| 1.6 | MBD3         | AC005943  | 41160_at    | methyl-CpG binding domain protein 3                                                     | -         | -         | -  |
| 1.6 | EGR1         | AI459194  | 227404_s_at | Early growth response 1                                                                 | -         | -         | -  |
| 1.6 | FAM173A      | NM_023933 | 219709_x_at | Family with sequence similarity 173, member A                                           | Hs.166244 | 65990     | 16 |
| 1.6 | ESRRA        | L38487    | 1487_at     | Estrogen-related receptor alpha                                                         | Hs.110849 | 2101      | 11 |
| 1.6 | MICAL2       | BE965029  | 212472_at   | Microtubule associated monooxygenase, calponin and LIM domain containing 2              | Hs.501928 | 9645      | 11 |
| 1.6 | LOC100133166 | AL044170  | 201383_s_at | Similar to neighbor of BRCA1 gene 1                                                     | Hs.277721 | 100133166 | 17 |
| 1.6 | CREB3L2      | BE675139  | 212345_s_at | Transcribed locus                                                                       | Hs.490273 | -         | 7  |
| 1.6 | SS18         | AW292882  | 202816_s_at | Synovial sarcoma translocation, chromosome 18                                           | Hs.404263 | 6760      | 18 |
| 1.6 | SH3BP2       | AB000463  | 211250_s_at | SH3-domain binding protein 2                                                            | -         | 6452      | -  |
| 1.6 | GPN3         | NM_016301 | 218461_at   | GPN-loop GTPase 3                                                                       | Hs.634680 | 51184     | 12 |
| 1.6 | CSTF2        | NM_001325 | 204459_at   | Cleavage stimulation factor, 3' pre-rNA, subunit 2, 64kDa                               | Hs.132370 | 1478      | X  |
| 1.6 | -            | AC004544  | 217249_x_at | cytochrome c oxidase subunit VIIa pseudogene 2                                          | -         | 1348      | -  |
| 1.6 | GGTLC3       | AI344075  | 215603_x_at | Gamma-glutamyltransferase light chain 3                                                 | Hs.454906 | 728226    | 22 |
| 1.6 | CLTB         | NM_007097 | 205172_x_at | Clathrin, light chain (Lcb)                                                             | Hs.484241 | 1212      | 5  |
| 1.6 | PTTG1IP      | NM_004339 | 200677_at   | Pituitary tumor-transforming 1 interacting protein                                      | Hs.474010 | 754       | 21 |
| 1.6 | TXLNA        | AL049795  | 212300_at   | taxilin alpha                                                                           | -         | -         | -  |
| 1.6 | SMC4         | AL136877  | 201664_at   | Structural maintenance of chromosomes 4                                                 | Hs.58992  | 10051     | 3  |
| 1.6 | ATRN         | AL132773  | 212517_at   | attractin                                                                               | -         | -         | -  |
| 1.6 | TMEM39B      | NM_018056 | 218770_s_at | Transmembrane protein 39B                                                               | Hs.25544  | 55116     | 1  |
| 1.6 | NDUFS6       | NM_004553 | 203606_at   | NADH dehydrogenase (ubiquinone) Fe-S protein 6, 13kDa (NADH-coenzyme Q reductase)       | Hs.408257 | 4726      | 5  |
| 1.6 | ANXA7        | J04543    | 209860_s_at | Annexin A7                                                                              | Hs.631827 | 310       | 10 |
| 1.6 | GPN2         | NM_018066 | 218799_at   | GPN-loop GTPase 2                                                                       | Hs.14333  | 54707     | 1  |
| 1.6 | RAC2         | BE138888  | 213603_s_at | Ras-related C3 botulinum toxin substrate 2 (rho family, small GTP binding protein Rac2) | Hs.517601 | 5880      | 22 |
| 1.6 | C19orf10     | AL524093  | 221739_at   | Chromosome 19 open reading frame 10                                                     | Hs.465645 | 56005     | 19 |
| 1.6 | NPEPPS       | AW055008  | 201454_s_at | Aminopeptidase puromycin sensitive                                                      | Hs.443837 | 9520      | 17 |
| 1.6 | RNASEK       | BE744389  | 224573_at   | Ribonuclease, RNase K                                                                   | -         | -         | -  |
| 1.6 | JRKL         | NM_003772 | 206734_at   | Jerky homolog-like (mouse)                                                              | Hs.105940 | 8690      | 11 |
| 1.6 | TMEM93       | NM_031298 | 221255_s_at | Transmembrane protein 93                                                                | Hs.30011  | 83460     | 17 |
| 1.6 | TAOK3        | AF181985  | 221508_at   | TAO kinase 3                                                                            | Hs.644420 | 51347     | 12 |
| 1.6 | EXOSC10      | NM_002685 | 207541_s_at | Exosome component 10                                                                    | Hs.632368 | 5394      | 1  |
| 1.5 | RPS6         | BE741754  | 200081_s_at | Ribosomal protein S6                                                                    | -         | -         | -  |
| 1.5 | KIF5B        | BF223224  | 201991_s_at | Kinesin family member 5B                                                                | Hs.644646 | 3799      | 10 |
| 1.5 | ANGEL2       | AU151793  | 221825_at   | Angel homolog 2 (Drosophila)                                                            | Hs.157078 | 90806     | 1  |
| 1.5 | CCDC44       | NM_016360 | 221069_s_at | Coiled-coil domain containing 44                                                        | Hs.174134 | 51204     | 17 |
| 1.5 | HDLBP        | AA515560  | 221767_x_at | High density lipoprotein binding protein                                                | Hs.471851 | 3069      | 2  |
| 1.5 | CUL3         | AF062537  | 201371_s_at | Cullin 3                                                                                | Hs.372286 | 8452      | 2  |
| 1.5 | BEX4         | AL523320  | 215440_s_at | Brain expressed, X-linked 4                                                             | Hs.184736 | 56271     | X  |
| 1.5 | CNP          | BC001362  | 208912_s_at | 2',3'-cyclic nucleotide 3' phosphodiesterase                                            | Hs.273621 | 1267      | 17 |
| 1.5 | ORC5L        | NM_002553 | 204957_at   | Origin recognition complex, subunit 5-like (yeast)                                      | Hs.432948 | 5001      | 7  |
| 1.5 | EXOC2        | NM_018303 | 219349_s_at | Exocyst complex component 2                                                             | Hs.484412 | 55770     | 6  |
| 1.5 | GMPPA        | NM_013335 | 218070_s_at | GDP-mannose pyrophosphorylase A                                                         | Hs.27059  | 29926     | 2  |

### Up-Regulated Transcripts (u133A U133B)

|     |          |           |             |                                                                          |           |       |    |
|-----|----------|-----------|-------------|--------------------------------------------------------------------------|-----------|-------|----|
| 1.5 | BAT5     | AL578487  | 224756_s_at | HLA-B associated transcript 5                                            |           |       |    |
| 1.5 | NBR1     | NM_005899 | 201384_s_at | Neighbor of BRCA1 gene 1                                                 | Hs.546264 | 4077  | 17 |
| 1.5 | HPSE     | AF155510  | 222881_at   | Heparanase                                                               |           |       |    |
| 1.5 | PCGF3    | AI692203  | 212753_at   | Polycomb group ring finger 3                                             | Hs.144309 | 10336 | 4  |
| 1.5 | AKT1     | NM_005163 | 207163_s_at | V-akt murine thymoma viral oncogene homolog 1                            | Hs.525622 | 207   | 14 |
| 1.5 | -        | AF056433  | 212498_at   | Cri-du-chat region mRNA, clone NIBB11                                    | Hs.561432 | -     | 5  |
| 1.5 | PPP3CA   | AA911231  | 202457_s_at | Protein phosphatase 3 (formerly 2B), catalytic subunit, alpha isoform    | Hs.435512 | 5530  | 4  |
| 1.5 | TARS2    | NM_025150 | 221189_s_at | Threonyl-tRNA synthetase 2, mitochondrial (putative)                     | Hs.288974 | 80222 | 1  |
| 1.5 | ANAPC13  | BC005398  | 209001_s_at | Anaphase promoting complex subunit 13                                    | Hs.106909 | 25847 | 3  |
| 1.5 | BTBD1    | NM_025238 | 217945_at   | BTB (POZ) domain containing 1                                            | Hs.459149 | 53339 | 15 |
| 1.5 | HMG1     | NM_004965 | 200944_s_at | High-mobility group nucleosome binding domain 1                          | Hs.356285 | 3150  | 21 |
| 1.5 | ATP5E    | NM_006886 | 217801_at   | ATP synthase, H+ transporting, mitochondrial F1 complex, epsilon subunit | Hs.177530 | 514   | 20 |
| 1.5 | EPS8L1   | NM_017729 | 218779_x_at | EPS8-like 1                                                              | Hs.438862 | 54869 | 19 |
| 1.5 | C19orf72 | AI073983  | 221851_at   | Chromosome 19 open reading frame 72                                      | Hs.443636 | 90379 | 19 |
| 1.5 | KIAA0182 | D80004    | 212056_at   | KIAA0182                                                                 | Hs.461647 | 23199 | 16 |
| 1.5 | GNA13    | AI928136  | 224761_at   | Guanine nucleotide binding protein (G protein), alpha 13                 |           |       |    |
