# Supplementary material
Source: PubMed Central journal article supplement (PMC3615580)
Supplement: supp1B.pdf [file supp1B.pdf]

### Down-Regulated Transcripts (U133A 133B)

| Fold Change | Gene ID   | Gene Identifier | Other ID    | Gene Title                                                                                                                                                                                                    | UG Cluster | LocusLink | Chromosome |
|-------------|-----------|-----------------|-------------|---------------------------------------------------------------------------------------------------------------------------------------------------------------------------------------------------------------|------------|-----------|------------|
| -1.5        | ATM       | U26455          | 210858_x_at | Ataxia telangiectasia mutated                                                                                                                                                                                 | Hs.367437  | 472       | 11         |
| -1.5        | CPSF3L    | NM_017871       | 217994_x_at | Cleavage and polyadenylation specific factor 3-like                                                                                                                                                           | Hs.6449    | 54973     | 1          |
| -1.5        | DDX5      | NM_004396       | 200033_at   | DEAD (Asp-Glu-Ala-Asp) box polypeptide 5                                                                                                                                                                      | Hs.279806  | 1655      | 17         |
| -1.5        | GTF2IRD2  | AC004883        | 215569_at   | general transcription factor III                                                                                                                                                                              | -          | 2969      | -          |
| -1.5        | GRAMD1B   | BE044440        | 212906_at   | GRAM domain containing 1B                                                                                                                                                                                     | Hs.144725  | 57476     | 11         |
| -1.5        | RPL15     | AF279903        | 221476_s_at | Ribosomal protein L15                                                                                                                                                                                         | Hs.381219  | 6138      | 3          |
| -1.5        | FTH1      | AA083483        | 214211_at   | Ferritin, heavy polypeptide 1                                                                                                                                                                                 | Hs.524910  | 2495      | 11         |
| -1.5        | ANXA11    | BG177920        | 214783_s_at | Annexin A11                                                                                                                                                                                                   | Hs.530291  | 311       | 10         |
| -1.5        | PABPC1    | AI734929        | 215157_x_at | Poly(A) binding protein, cytoplasmic 1                                                                                                                                                                        | Hs.387804  | 26986     | 8          |
| -1.5        | MAP3K3    | BF971923        | 203514_at   | Mitogen-activated protein kinase kinase 3                                                                                                                                                                     | Hs.29282   | 4215      | 17         |
| -1.5        | AKAP13    | BF222823        | 209534_x_at | A kinase (PRKA) anchor protein 13                                                                                                                                                                             | Hs.710656  | 11214     | 15         |
| -1.5        | BRD2      | AA902767        | 208685_x_at | Bromodomain containing 2                                                                                                                                                                                      | Hs.75243   | 6046      | 6          |
| -1.5        | LARP7     | AK000089        | 215246_at   | La ribonucleoprotein domain family, member 7                                                                                                                                                                  | Hs.713663  | 51574     | 4          |
| -1.5        | CYP7B1    | NM_004820       | 207386_at   | Cytochrome P450, family 7, subfamily B, polypeptide 1                                                                                                                                                         | Hs.667720  | 9420      | 8          |
| -1.6        | MAML3     | NM_005878       | 207946_at   | mastermind-like 3 (Drosophila)                                                                                                                                                                                | -          | -         | -          |
| -1.6        | PUS3      | NM_031307       | 221277_s_at | Pseudouridylate synthase 3                                                                                                                                                                                    | Hs.660922  | 83480     | 11         |
| -1.6        | FLI1-AS1  | AI860159        | 239641_at   | Homo sapiens, clone IMAGE:5173389, mRNA                                                                                                                                                                       | -          | -         | -          |
| -1.6        | ZNF350    | NM_021632       | 219266_at   | Zinc finger protein 350                                                                                                                                                                                       | Hs.407694  | 59348     | 19         |
| -1.6        | SLC28A3   | NM_022127       | 220475_at   | Solute carrier family 28 (sodium-coupled nucleoside transporter), member 3                                                                                                                                    | Hs.591877  | 64078     | 9          |
| -1.6        | BIN1      | NM_004305       | 202931_x_at | Bridging integrator 1                                                                                                                                                                                         | Hs.193163  | 274       | 2          |
| -1.6        | HLA-E     | M31183          | 217456_x_at | Major histocompatibility complex, class I, E                                                                                                                                                                  | Hs.650174  | 3133      | 6          |
| -1.6        | ZFAND5    | AF062347        | 210275_s_at | Zinc finger, AN1-type domain 5                                                                                                                                                                                | Hs.406096  | 7763      | 9          |
| -1.6        | HSP90AA1  | R01140          | 214328_s_at | heat shock protein 90kDa alpha (cytosolic), class A member 1                                                                                                                                                  | -          | -         | -          |
| -1.6        | CYTH4     | NM_013385       | 219183_s_at | Cytohesin 4                                                                                                                                                                                                   | Hs.170944  | 27128     | 22         |
| -1.6        | ADAM22    | AW242701        | 213411_at   | Transcribed locus                                                                                                                                                                                             | Hs.592567  | -         | 7          |
| -1.6        | BMP2K     | AU145366        | 226853_at   | BMP2 inducible kinase                                                                                                                                                                                         | -          | -         | -          |
| -1.6        | TYRO3     | D50479          | 211431_s_at | TYRO3 protein tyrosine kinase                                                                                                                                                                                 | Hs.381282  | 7301      | 15         |
| -1.6        | RPL23     | NM_000978       | 200888_s_at | Ribosomal protein L23                                                                                                                                                                                         | Hs.406300  | 9349      | 17         |
| -1.6        | CABIN1    | AB002328        | 37652_at    | Calcineurin binding protein 1                                                                                                                                                                                 | Hs.517478  | 23523     | 22         |
| -1.6        | SP140     | NM_007237       | 207777_s_at | SP140 nuclear body protein                                                                                                                                                                                    | Hs.632549  | 11262     | 2          |
| -1.6        | RPS17     | NM_001021       | 201665_x_at | Ribosomal protein S17                                                                                                                                                                                         | Hs.433427  | 6218      | 15         |
| -1.6        | LOC441996 | AL021877        | 217337_at   | Human DNA sequence from clone RP1-101G11 on chromosome 22q12 Contains an ACO2 (Mitochondrial Aconitate Hydratase (Aconitase, Citrate Hydro-Lyase, EC 4.2.1.3)) pseudogene, ESTs, STSs, GSSs and a CpG islandn | -          | -         | -          |
| -1.6        | TRPV1     | AF196175        | 219632_s_at | Transient receptor potential cation channel, subfamily V, member 1                                                                                                                                            | Hs.655380  | 7442      | 17         |
| -1.6        | SSR3      | AW087870        | 222411_s_at | Signal sequence receptor, gamma (translocon-associated protein gamma)                                                                                                                                         | -          | -         | -          |
| -1.6        | TAZ       | X92762          | 37278_at    | Tafazzin                                                                                                                                                                                                      | Hs.409911  | 6901      | X          |
| -1.6        | ZNF335    | AA845577        | 78330_at    | Zinc finger protein 335                                                                                                                                                                                       | Hs.174193  | 63925     | 20         |
| -1.6        | EEF1B2    | NM_001959       | 200705_s_at | Eukaryotic translation elongation factor 1 beta 2                                                                                                                                                             | Hs.421608  | 1933      | 2          |
| -1.6        | HIVEP1    | NM_002114       | 204512_at   | Human immunodeficiency virus type I enhancer binding protein 1                                                                                                                                                | Hs.567284  | 3096      | 6          |
| -1.6        | GPR35     | AF089087        | 210264_at   | G protein-coupled receptor 35                                                                                                                                                                                 | Hs.239891  | 2859      | 2          |
| -1.6        | RPL22     | NM_000983       | 220960_x_at | Ribosomal protein L22                                                                                                                                                                                         | Hs.515329  | 6146      | 1          |
| -1.6        | LOC647979 | AV729406        | 224597_at   | Transcribed locus, moderately similar to XP_001367988.1 PREDICTED: similar to keratin 19 [Monodelphis domestica]                                                                                              | -          | -         | -          |
| -1.6        | RPS14     | AF116710        | 208645_s_at | ribosomal protein S14                                                                                                                                                                                         | -          | -         | -          |
| -1.6        | RNF130    | AW194818        | 222058_at   | Ring finger protein 130                                                                                                                                                                                       | Hs.484363  | 55819     | 5          |
| -1.6        | CD99      | NM_002414       | 201029_s_at | CD99 molecule                                                                                                                                                                                                 | Hs.654354  | 4267      | X Y        |
| -1.6        | RPL4      | BC005817        | 211710_x_at | Ribosomal protein L4                                                                                                                                                                                          | Hs.644628  | 6124      | 15         |
| -1.7        | EIF4A2    | NM_001967       | 200912_s_at | Eukaryotic translation initiation factor 4A, isoform 2                                                                                                                                                        | Hs.518475  | 1974      | 3          |
| -1.7        | TRAK1     | AK000754        | 214924_s_at | Trafficking protein, kinesin binding 1                                                                                                                                                                        | Hs.535711  | 22906     | 3          |
| -1.7        | MAP4      | AL523310        | 212566_at   | Microtubule-associated protein 4                                                                                                                                                                              | Hs.517949  | 4134      | 3          |
| -1.7        | BBS1      | NM_024649       | 218471_s_at | Bardet-Biedl syndrome 1                                                                                                                                                                                       | Hs.502915  | 582       | 11         |
| -1.7        | H3F3B     | Z48950          | 211999_at   | H3 histone, family 3B (H3.3B)                                                                                                                                                                                 | -          | 3021      | -          |
| -1.7        | RPAP1     | NM_015540       | 218441_s_at | RNA polymerase II associated protein 1                                                                                                                                                                        | Hs.371045  | 26015     | 15         |
| -1.7        | SLC16A2   | NM_006517       | 204462_s_at | Solute carrier family 16, member 2 (monocarboxylic acid transporter 8)                                                                                                                                        | Hs.75317   | 6567      | X          |
| -1.7        | C1orf151  | BF244614        | 224867_at   | Chromosome 1 open reading frame 151                                                                                                                                                                           | -          | -         | -          |
| -1.7        | EEF1D     | AI613383        | 214394_x_at | Eukaryotic translation elongation factor 1 delta (guanine nucleotide exchange protein)                                                                                                                        | Hs.333388  | 1936      | 8          |
| -1.7        | TSPYL1    | AL136629        | 221493_at   | TSPY-like 1                                                                                                                                                                                                   | Hs.458358  | 7259      | 6          |
| -1.7        | NDE1      | NM_017668       | 218414_s_at | NudE nuclear distribution gene E homolog 1 (A. nidulans)                                                                                                                                                      | Hs.655378  | 54820     | 16         |
| -1.7        | NACA      | BF976260        | 208635_x_at | Nascent polypeptide-associated complex alpha subunit                                                                                                                                                          | Hs.505735  | 4666      | 12         |
| -1.7        | RPL14     | U16738          | 200074_s_at | Ribosomal protein L14                                                                                                                                                                                         | Hs.719095  | 9045      | 3          |
| -1.7        | RPL5      | NM_000969       | 200937_s_at | Ribosomal protein L5                                                                                                                                                                                          | Hs.532359  | 6125      | 1          |

### Down-Regulated Transcripts (U133A 133B)

|      |              |           |             |                                                                                                                          |           |        |     |
|------|--------------|-----------|-------------|--------------------------------------------------------------------------------------------------------------------------|-----------|--------|-----|
| -1.7 | ZNF573       | BE515346  | 217627_at   | Zinc finger protein 573                                                                                                  | Hs.531262 | 126231 | 19  |
| -1.7 | FBXL7        | AU145127  | 213249_at   | F-box and leucine-rich repeat protein 7                                                                                  | Hs.433057 | 23194  | 5   |
| -1.7 | POFUT2       | BC000626  | 209578_s_at | Protein O-fucosyltransferase 2                                                                                           | Hs.592164 | 23275  | 21  |
| -1.7 | CNST         | AV700816  | 225550_at   | Chromosome 1 open reading frame 71                                                                                       |           |        |     |
| -1.7 | RPL17        | BE733979  | 212537_x_at | Ribosomal protein L17                                                                                                    | Hs.485090 | 6139   | 18  |
| -1.7 | PTCD2        | NM_024754 | 219658_at   | Pentatricopeptide repeat domain 2                                                                                        | Hs.126906 | 79810  | 5   |
| -1.7 | CCNL2        | NM_030937 | 221427_s_at | Cyclin L2                                                                                                                | Hs.515704 | 81669  | 1   |
| -1.7 | HIP1R        | AB014555  | 38340_at    | Huntingtin interacting protein 1 related                                                                                 | Hs.524815 | 9026   | 12  |
| -1.7 | STAT5A       | NM_003152 | 203010_at   | Signal transducer and activator of transcription 5A                                                                      | Hs.437058 | 6776   | 17  |
| -1.7 | CLK4         | AF212224  | 210346_s_at | CDC-like kinase 4                                                                                                        | -         | -      | -   |
| -1.7 | DPH5         | NM_015958 | 219590_x_at | DPH5 homolog (S. cerevisiae)                                                                                             | Hs.440776 | 51611  | 1   |
| -1.7 | LOC100130938 | AW139393  | 230574_at   | Hypothetical protein LOC100130938                                                                                        |           |        |     |
| -1.7 | -            | AI633618  | 243115_at   | CDNA FLJ36110 fis, clone TESTI201939                                                                                     |           |        |     |
| -1.7 | PL-5283      | BE738276  | 224751_at   | PL-5283 protein                                                                                                          |           |        |     |
| -1.7 | RPL29        | NM_000992 | 200823_x_at | Ribosomal protein L29                                                                                                    | Hs.425125 | 6159   | 3   |
| -1.7 | CNIH4        | AL136930  | 223993_s_at | Cornichon homolog 4 (Drosophila)                                                                                         |           |        |     |
| -1.7 | SPPL2A       | AI674647  | 226353_at   | Signal peptide peptidase-like 2A                                                                                         |           |        |     |
| -1.7 | CIRBP        | NM_001280 | 200811_at   | Cold inducible RNA binding protein                                                                                       | Hs.634522 | 1153   | 19  |
| -1.7 | GNB4         | H99792    | 225710_at   | Guanine nucleotide binding protein (G protein), beta polypeptide 4                                                       |           |        |     |
| -1.7 | SCMH1        | NM_012236 | 221216_s_at | Sex comb on midleg homolog 1 (Drosophila)                                                                                | Hs.571874 | 22955  | 1   |
| -1.7 | ZSCAN18      | NM_023926 | 218312_s_at | Zinc finger and SCAN domain containing 18                                                                                | Hs.235390 | 65982  | 19  |
| -1.7 | UBE2T        | AB032931  | 223229_at   | Ubiquitin-conjugating enzyme E2T (putative)                                                                              |           |        |     |
| -1.7 | GTF2A1       | AU144104  | 225433_at   | General transcription factor IIA, 1, 19/37kDa                                                                            |           |        |     |
| -1.7 | EDA2R        | NM_021783 | 221399_at   | Ectodysplasin A2 receptor                                                                                                | Hs.302017 | 60401  | X   |
| -1.7 | SH2B2        | NM_020979 | 205367_at   | SH2B adaptor protein 2                                                                                                   | Hs.489448 | 10603  | 7   |
| -1.7 | SFRS17A      | NM_005088 | 203624_at   | Splicing factor, arginine/serine-rich 17A                                                                                | Hs.522572 | 8227   | X Y |
| -1.8 | EIF5         | AK026933  | 208706_s_at | Eukaryotic translation initiation factor 5                                                                               | Hs.433702 | 1983   | 14  |
| -1.8 | RPL36AP52    | Z98950    | 217256_x_at | ribosomal protein L36a pseudogene 52                                                                                     | -         | 207032 | -   |
| -1.8 | DDX3X        | NM_001356 | 201210_at   | DEAD (Asp-Glu-Ala-Asp) box polypeptide 3, X-linked                                                                       | Hs.719127 | 1654   | X   |
| -1.8 | LOC729082    | BF791544  | 225225_at   | Hypothetical protein LOC729082                                                                                           |           |        |     |
| -1.8 | TMEM40       | AI087937  | 222892_s_at | Transmembrane protein 40                                                                                                 |           |        |     |
| -1.8 | SFRS5        | NM_006925 | 203380_x_at | Splicing factor, arginine/serine-rich 5                                                                                  | Hs.632326 | 6430   | 14  |
| -1.8 | TMEM60       | AF260336  | 223396_at   | Transmembrane protein 60                                                                                                 |           |        |     |
| -1.8 | FBXO41       | AA524093  | 44040_at    | F-box protein 41                                                                                                         | Hs.23158  | 150726 | 2   |
| -1.8 | NFKBIZ       | AB037925  | 223218_s_at | Nuclear factor of kappa light polypeptide gene enhancer in B-cells inhibitor, zeta                                       |           |        |     |
| -1.8 | TRPC4        | NM_016179 | 220818_s_at | Transient receptor potential cation channel, subfamily C, member 4                                                       | Hs.262960 | 7223   | 13  |
| -1.8 | PCIF1        | AI743331  | 89948_at    | PDX1 C-terminal inhibiting factor 1                                                                                      | Hs.716563 | 63935  | 20  |
| -1.8 | TTY15        | AL080135  | 214983_at   | Transcribed locus                                                                                                        | Hs.433656 | 64595  | Y   |
| -1.8 | SCOC         | AL133580  | 224786_at   | Short coiled-coil protein                                                                                                |           |        |     |
| -1.8 | PNKD         | AB033010  | 233177_s_at | Paroxysmal nonkinesigenic dyskinesia                                                                                     |           |        |     |
| -1.8 | LOC441454    | AF257099  | 216384_x_at | similar to prothymosin alpha                                                                                             | -         | -      | -   |
| -1.8 | TPD52        | AA524023  | 201690_s_at | Tumor protein D52                                                                                                        | Hs.368433 | 7163   | 8   |
| -1.8 | TRIM29       | AF230389  | 211001_at   | tripartite motif-containing 29                                                                                           | -         | 23650  | -   |
| -1.8 | HCST         | AF285447  | 223640_at   | Hematopoietic cell signal transducer                                                                                     |           |        |     |
| -1.8 | OGT          | BF001665  | 212307_s_at | O-linked N-acetylglucosamine (GlcNAc) transferase (UDP-N-acetylglucosamine:polypeptide-N-acetylglucosaminyl transferase) | Hs.405410 | 8473   | X   |
| -1.8 | AMPD2        | AI916249  | 212360_at   | Adenosine monophosphate deaminase 2 (isoform L)                                                                          | Hs.82927  | 271    | 1   |
| -1.8 | -            | AI357639  | 225716_at   | Transcribed locus                                                                                                        |           |        |     |
| -1.8 | CLSTN1       | NM_014944 | 201561_s_at | Calsyntenin 1                                                                                                            | Hs.29665  | 22883  | 1   |
| -1.8 | DNNTIP2      | NM_014597 | 202776_at   | Deoxynucleotidyltransferase, terminal, interacting protein 2                                                             | Hs.85769  | 30836  | 1   |
| -1.8 | IGF2BP2      | NM_006548 | 218847_at   | Insulin-like growth factor 2 mRNA binding protein 2                                                                      | Hs.35354  | 10644  | 3   |
| -1.8 | EIF3E        | BC000734  | 208697_s_at | Eukaryotic translation initiation factor 3, subunit E                                                                    | Hs.405590 | 3646   | 8   |
| -1.8 | BTG3         | AI765445  | 213134_x_at | BTG family, member 3                                                                                                     | Hs.473420 | 10950  | 21  |
| -1.8 | SH2B1        | AL049924  | 40149_at    | SH2B adaptor protein 1                                                                                                   | Hs.15744  | 25970  | 16  |
| -1.8 | UBASH3B      | AI927919  | 238587_at   | Ubiquitin associated and SH3 domain containing, B                                                                        |           |        |     |
| -1.8 | IRGQ         | AW003091  | 64488_at    | Immunity-related GTPase family, Q                                                                                        | Hs.6217   | 126298 | 19  |
| -1.8 | PNN          | AW152664  | 212036_s_at | Pinin, desmosome associated protein                                                                                      | Hs.409965 | 5411   | 14  |
| -1.8 | TOMM5        | BF969806  | 225036_at   | Translocase of outer mitochondrial membrane 5 homolog (yeast)                                                            |           |        |     |
| -1.8 | PLDN         | BF680495  | 224892_at   | pallidin homolog (mouse)                                                                                                 |           |        |     |
| -1.8 | GPR56        | AL554008  | 212070_at   | G protein-coupled receptor 56                                                                                            | Hs.513633 | 9289   | 16  |
| -1.8 | SP110        | AF280094  | 209762_x_at | SP110 nuclear body protein                                                                                               | Hs.145150 | 3431   | 2   |
| -1.8 | SUSD1        | AL137432  | 226264_at   | Sushi domain containing 1                                                                                                |           |        |     |
| -1.8 | SLC6A8       | U17986    | 210854_x_at | Solute carrier family 6 (neurotransmitter transporter, creatine), member 8                                               | Hs.540696 | 6535   | X   |
| -1.8 | RALGDS       | AI421559  | 209050_s_at | Ral guanine nucleotide dissociation stimulator                                                                           | Hs.106185 | 5900   | 9   |
| -1.9 | RRP7A        | NM_015703 | 202938_x_at | Ribosomal RNA processing 7 homolog A (S. cerevisiae)                                                                     | Hs.534041 | 27341  | 22  |

### Down-Regulated Transcripts (U133A 133B)

|      |           |           |             |                                                                                                                                                       |           |        |    |
|------|-----------|-----------|-------------|-------------------------------------------------------------------------------------------------------------------------------------------------------|-----------|--------|----|
| -1.9 | EEF2      | AI004246  | 200094_s_at | Eukaryotic translation elongation factor 2                                                                                                            | Hs.515070 | 1938   | 19 |
| -1.9 | TNK2      | NM_005781 | 203839_s_at | Tyrosine kinase, non-receptor, 2                                                                                                                      | Hs.518513 | 10188  | 3  |
| -1.9 | CD22      | X59350    | 38521_at    | CD22 molecule                                                                                                                                         | Hs.579691 | 933    | 19 |
| -1.9 | USP19     | AW451502  | 214674_at   | Ubiquitin specific peptidase 19                                                                                                                       | Hs.255596 | 10869  | 3  |
| -1.9 | MZT       | AI885466  | 225578_at   | Chromosome 13 open reading frame 37                                                                                                                   |           |        |    |
| -1.9 | KCTD20    | AV707142  | 228299_at   | Potassium channel tetramerisation domain containing 20                                                                                                |           |        |    |
| -1.9 | ACSS2     | AK000162  | 234312_s_at | Acyl-CoA synthetase short-chain family member 2                                                                                                       |           |        |    |
| -1.9 | LYSMD2    | AI674731  | 226748_at   | LysM, putative peptidoglycan-binding, domain containing 2                                                                                             |           |        |    |
| -1.9 | PHLDA1    | AA576961  | 217996_at   | Pleckstrin homology-like domain, family A, member 1                                                                                                   | Hs.602085 | 22822  | 12 |
| -1.9 | ACACB     | AI057637  | 49452_at    | Acetyl-Coenzyme A carboxylase beta                                                                                                                    | Hs.234898 | 32     | 12 |
| -1.9 | RPL26     | AL121871  | 222229_x_at | ribosomal protein L26 pseudogene 37                                                                                                                   | -         | -      | -  |
| -1.9 | IPO9      | AW269792  | 213785_at   | Importin 9                                                                                                                                            | Hs.596014 | 55705  | 1  |
| -1.9 | -         | AK022254  | 215876_at   | CDNA FLJ12192 fis, clone MAMMA1000851                                                                                                                 | Hs.600188 | -      | 9  |
| -1.9 | SNAPC4    | AK023513  | 215926_x_at | Small nuclear RNA activating complex, polypeptide 4, 190kDa                                                                                           | Hs.113265 | 6621   | 9  |
| -1.9 | ZNF644    | AK023596  | 222580_at   | Zinc finger protein 644                                                                                                                               |           |        |    |
| -1.9 | SPATA6    | NM_019073 | 220299_at   | Spermatogenesis associated 6                                                                                                                          | Hs.538103 | 54558  | 1  |
| -1.9 | CDC42SE1  | BG150636  | 229120_s_at | CDC42 small effector 1                                                                                                                                |           |        |    |
| -1.9 | TUFT1     | NM_020127 | 205807_s_at | Tuftelin 1                                                                                                                                            | Hs.489922 | 7286   | 1  |
| -1.9 | HNF4A     | X87870    | 214851_at   | Hepatocyte nuclear factor 4, alpha                                                                                                                    | Hs.116462 | 3172   | 20 |
| -1.9 | EIF4B     | BF247371  | 211938_at   | CDNA clone IMAGE:4181418                                                                                                                              | Hs.702041 | -      | 12 |
| -1.9 | CASP1     | U13700    | 211368_s_at | Caspase 1, apoptosis-related cysteine peptidase (interleukin 1, beta, convertase)                                                                     | Hs.2490   | 834    | 11 |
| -1.9 | PDE4D     | AF012074  | 210837_s_at | Phosphodiesterase 4D, cAMP-specific (phosphodiesterase E3 dunce homolog, Drosophila)                                                                  | Hs.117545 | 5144   | 5  |
| -1.9 | RPS10     | AL118510  | 217336_at   | ribosomal protein S10 pseudogene 2                                                                                                                    | -         | 140758 | -  |
| -1.9 | PIAS2     | AF077953  | 214442_s_at | Protein inhibitor of activated STAT, 2                                                                                                                | Hs.658013 | 9063   | 18 |
| -1.9 | RGS14     | AF037195  | 38290_at    | Regulator of G-protein signaling 14                                                                                                                   | Hs.9347   | 10636  | 5  |
| -1.9 | VPS37B    | BC005882  | 221704_s_at | Vacuolar protein sorting 37 homolog B (S. cerevisiae)                                                                                                 | Hs.507162 | 79720  | 12 |
| -1.9 | AKR1C1    | S68290    | 216594_x_at | Aldo-keto reductase family 1, member C1 (dihydrodiol dehydrogenase 1; 20-alpha (3-alpha)-hydroxysteroid dehydrogenase)                                | Hs.460260 | 1645   | 10 |
| -1.9 | TSPYL4    | AL050331  | 212928_at   | TSPY-like 4                                                                                                                                           | -         | -      | -  |
| -1.9 | NIPSNAP3A | BC005935  | 224436_s_at | Nipsnap homolog 3A (C. elegans)                                                                                                                       |           |        |    |
| -1.9 | FAM65C    | AI056877  | 227654_at   | Family with sequence similarity 65, member C                                                                                                          |           |        |    |
| -1.9 | PBXIP1    | AI935162  | 214177_s_at | Pre-B-cell leukemia homeobox interacting protein 1                                                                                                    | Hs.505806 | 57326  | 1  |
| -1.9 | STAC      | NM_003149 | 205743_at   | SH3 and cysteine rich domain                                                                                                                          | Hs.56045  | 6769   | 3  |
| -1.9 | RBM39     | NM_004902 | 207941_s_at | RNA binding motif protein 39                                                                                                                          | Hs.282901 | 9584   | 20 |
| -1.9 | HSPA5     | AF216292  | 211936_at   | Heat shock 70kDa protein 5 (glucose-regulated protein, 78kDa)                                                                                         | Hs.716396 | 3309   | 9  |
| -2.0 | 1         | AV702487  | 225826_at   | Methylmalonic aciduria (cobalamin deficiency) cblB type                                                                                               |           |        |    |
| -2.0 | 1         | AW149498  | 225389_at   | BTB (POZ) domain containing 6                                                                                                                         |           |        |    |
| -2.0 | SRRT      | AI523895  | 222046_at   | Serrate RNA effector molecule homolog (Arabidopsis)                                                                                                   | Hs.111801 | 51593  | 7  |
| -2.0 | VPRBP     | NM_014703 | 204376_at   | Vpr (HIV-1) binding protein                                                                                                                           | Hs.716623 | 9730   | 3  |
| -2.0 | 1         | BG170743  | 225084_at   | Exocyst complex component 5                                                                                                                           |           |        |    |
| -2.0 | MAPK11    | U92268    | 211499_s_at | mitogen-activated protein kinase 11                                                                                                                   | -         | 5600   | -  |
| -2.0 | NEUROG2   | AF303002  | 215632_at   | neurogenin 2                                                                                                                                          | -         | 63973  | -  |
| -2.0 | GOLGA8A   | AW006438  | 213650_at   | Golgi autoantigen, golgin subfamily a, 8A                                                                                                             | Hs.182982 | 23015  | 15 |
| -2.0 | -         | AF053356  | 37796_at    | leucine-rich repeats and calponin homology (CH) domain containing 4                                                                                   | -         | -      | -  |
| -2.0 | -         | M30448    | 211623_s_at | fibrillarin                                                                                                                                           | -         | -      | -  |
| -2.0 | -         | AL121916  | 216342_x_at | ribosomal protein S4X pseudogene 13 /// ribosomal protein S4X pseudogene 17 /// ribosomal protein S4X pseudogene 7 /// ribosomal protein S4, X-linked | -         | -      | -  |
| -2.0 | AES       | NM_001130 | 217729_s_at | Amino-terminal enhancer of split                                                                                                                      | Hs.515053 | 166    | 19 |
| -2.0 | CDCA3     | BC002551  | 223307_at   | Cell division cycle associated 3                                                                                                                      |           |        |    |
| -2.0 | AMT       | NM_000481 | 204294_at   | Aminomethyltransferase                                                                                                                                | Hs.102    | 275    | 3  |
| -2.0 | TRIM14    | NM_014788 | 203148_s_at | Tripartite motif-containing 14                                                                                                                        | Hs.575631 | 9830   | 9  |
| -2.0 | CAMLG     | NM_001745 | 203538_at   | Calcium modulating ligand                                                                                                                             | Hs.529846 | 819    | 5  |
| -2.0 | ZNF337    | AL049942  | 214760_at   | Zinc finger protein 337                                                                                                                               | Hs.661684 | 26152  | 20 |
| -2.0 | LILRB3    | NM_024318 | 208594_x_at | Leukocyte immunoglobulin-like receptor, subfamily B (with TM and ITIM domains), member 3                                                              | Hs.688335 | 11025  | 19 |
| -2.0 | -         | BE671038  | 230793_at   | Transcribed locus                                                                                                                                     |           |        |    |
| -2.0 | ME3       | NM_006680 | 204663_at   | Malic enzyme 3, NADP(+)-dependent, mitochondrial                                                                                                      | Hs.199743 | 10873  | 11 |
| -2.0 | SEP6      | D50918    | 212413_at   | Septin 6                                                                                                                                              | Hs.496666 | 23157  | X  |
| -2.0 | -         | AW500340  | 242714_at   | Transcribed locus                                                                                                                                     |           |        |    |
| -2.0 | RASA4     | AI738591  | 212707_s_at | RAS p21 protein activator 4                                                                                                                           | Hs.530089 | 10156  | 7  |
| -2.0 | ZDHHC5    | AK023130  | 224858_at   | Zinc finger, DHHC-type containing 5                                                                                                                   |           |        |    |
| -2.0 | SLC17A9   | NM_022082 | 219559_at   | Solute carrier family 17, member 9                                                                                                                    | Hs.512686 | 63910  | 20 |
| -2.0 | MYO5C     | NM_018728 | 218966_at   | Myosin VC                                                                                                                                             | Hs.487036 | 55930  | 15 |
| -2.0 | TIAF1     | NM_004740 | 202039_at   | TGFBI-induced anti-apoptotic factor 1                                                                                                                 | Hs.462590 | 9220   | 17 |

### Down-Regulated Transcripts (U133A 133B)

|      |           |           |             |                                                                                                                                                                                                                               |           |       |    |
|------|-----------|-----------|-------------|-------------------------------------------------------------------------------------------------------------------------------------------------------------------------------------------------------------------------------|-----------|-------|----|
| -2.0 | RPS8      | NM_001012 | 200858_s_at | Ribosomal protein S8                                                                                                                                                                                                          | Hs.512675 | 6202  | 1  |
| -2.1 | PDLIM2    | NM_021630 | 219165_at   | PDZ and LIM domain 2 (mystique)                                                                                                                                                                                               | Hs.632034 | 64236 | 8  |
| -2.1 | BSPRY     | NM_017688 | 218792_s_at | B-box and SPRY domain containing                                                                                                                                                                                              | Hs.614517 | 54836 | 9  |
| -2.1 | GABARAPL3 | AF180519  | 211458_s_at | GABA(A) receptors associated protein like 3 (pseudogene)                                                                                                                                                                      | Hs.592014 | 23766 | 15 |
| -2.1 | HAU55     | AW189966  | 213053_at   | HAUS augmin-like complex, subunit 5                                                                                                                                                                                           | Hs.7426   | 23354 | 19 |
| -2.1 | -         | BE616825  | 223158_s_at | NIMA (never in mitosis gene a)-related kinase 6                                                                                                                                                                               |           |       |    |
| -2.1 | RCC1      | AJ006835  | 215011_at   | Regulator of chromosome condensation 1                                                                                                                                                                                        | Hs.469723 | 1104  | 1  |
| -2.1 | ALDH1A1   | NM_000689 | 212224_at   | Aldehyde dehydrogenase 1 family, member A1                                                                                                                                                                                    | Hs.76392  | 216   | 9  |
| -2.1 | -         | NM_023941 | 218641_at   | hypothetical protein LOC65998                                                                                                                                                                                                 | -         | -     | -  |
| -2.1 | HINT2     | AF356515  | 224415_s_at | Histidine triad nucleotide binding protein 2                                                                                                                                                                                  |           |       |    |
| -2.1 | -         | AA601208  | 60815_at    | Williams Beuren syndrome chromosome region 19 pseudogene, mRNA (cDNA clone IMAGE:4826159)                                                                                                                                     | Hs.645327 | -     | 7  |
| -2.1 | ZNF395    | NM_018660 | 221123_x_at | Zinc finger protein 395                                                                                                                                                                                                       | Hs.699209 | 55893 | 8  |
| -2.1 | CEP164    | NM_014956 | 204251_s_at | Centrosomal protein 164kDa                                                                                                                                                                                                    | Hs.504009 | 22897 | 11 |
| -2.1 | EIF1      | W67644    | 212227_x_at | Eukaryotic translation initiation factor 1                                                                                                                                                                                    | Hs.150580 | 10209 | 17 |
| -2.1 | -         | BG291685  | 225413_at   | up-regulated during skeletal muscle growth 5 homolog (mouse)                                                                                                                                                                  |           |       |    |
| -2.1 | MYH11     | NM_022844 | 201497_x_at | Myosin, heavy chain 11, smooth muscle                                                                                                                                                                                         | Hs.460109 | 4629  | 16 |
| -2.1 | ATXN7     | AF032105  | 209964_s_at | Ataxin 7                                                                                                                                                                                                                      | Hs.476595 | 6314  | 3  |
| -2.1 | ARHGAP26  | BE671084  | 205068_s_at | Rho GTPase activating protein 26                                                                                                                                                                                              | Hs.654668 | 23092 | 5  |
| -2.1 | BBS9      | U87408    | 37549_g_at  | Bardet-Biedl syndrome 9                                                                                                                                                                                                       | Hs.372360 | 27241 | 7  |
| -2.1 | MXI1      | NM_005962 | 202364_at   | MAX interactor 1                                                                                                                                                                                                              | Hs.719185 | 4601  | 10 |
| -2.1 | STK17B    | AA203487  | 217503_at   | Serine/threonine kinase 17b                                                                                                                                                                                                   | Hs.88297  | 9262  | 2  |
| -2.1 | NR112     | AF061056  | 207203_s_at | Nuclear receptor subfamily 1, group I, member 2                                                                                                                                                                               | Hs.7303   | 8856  | 3  |
| -2.2 | F11R      | AF172398  | 223000_s_at | F11 receptor                                                                                                                                                                                                                  |           |       |    |
| -2.2 | EMR2      | NM_013447 | 207610_s_at | Egf-like module containing, mucin-like, hormone receptor-like 2                                                                                                                                                               | Hs.531619 | 30817 | 19 |
| -2.2 | -         | AW290940  | 226773_at   | Transcribed locus                                                                                                                                                                                                             |           |       |    |
| -2.2 | -         | AF077053  | 221617_at   | TAF9B RNA polymerase II, TATA box binding protein (TBP)-associated factor, 31kDa                                                                                                                                              | -         | 51616 | -  |
| -2.2 | -         | AI807023  | 226633_at   | RAB8B, member RAS oncogene family                                                                                                                                                                                             |           |       |    |
| -2.2 | -         | NM_022448 | 219610_at   | Rho-guanine nucleotide exchange factor                                                                                                                                                                                        | -         | -     | -  |
| -2.2 | SLC39A9   | AK025831  | 222445_at   | Solute carrier family 39 (zinc transporter), member 9                                                                                                                                                                         |           |       |    |
| -2.2 | XPA       | NM_000380 | 205672_at   | Xeroderma pigmentosum, complementation group A                                                                                                                                                                                | Hs.654364 | 7507  | 9  |
| -2.2 | NIN       | AL359571  | 225921_at   | Ninein (GSK3B interacting protein)                                                                                                                                                                                            |           |       |    |
| -2.2 | UGGT1     | AK025416  | 231968_at   | CDNA: FLJ121763 fis, clone COLF6967                                                                                                                                                                                           |           |       |    |
| -2.2 | LRR1      | AA742244  | 235113_at   | Peptidylprolyl isomerase (cyclophilin)-like 5                                                                                                                                                                                 |           |       |    |
| -2.2 | ZCCHC17   | AF151077  | 223107_s_at | Zinc finger, CCHC domain containing 17                                                                                                                                                                                        |           |       |    |
| -2.2 | -         | AL137067  | 216821_at   | keratin 8 /// keratin 8 pseudogene 9 /// similar to keratin 8 /// similar to keratin 8                                                                                                                                        | -         | -     | -  |
| -2.2 | PPP3CC    | NM_005605 | 207000_s_at | Protein phosphatase 3 (formerly 2B), catalytic subunit, gamma isoform                                                                                                                                                         | Hs.655661 | 5533  | 8  |
| -2.2 | -         | N32051    | 229307_at   | Ankyrin repeat domain 28                                                                                                                                                                                                      |           |       |    |
| -2.2 | C20orf111 | AF217514  | 209020_at   | Chromosome 20 open reading frame 111                                                                                                                                                                                          | Hs.75798  | 51526 | 20 |
| -2.2 | COL7A1    | NM_000094 | 204136_at   | Collagen, type VII, alpha 1                                                                                                                                                                                                   | Hs.476218 | 1294  | 3  |
| -2.2 | SDC2      | AL577322  | 212158_at   | Syndecan 2                                                                                                                                                                                                                    | Hs.1501   | 6383  | 8  |
| -2.2 | TTC17     | NM_018259 | 218972_at   | Tetrapeptide repeat domain 17                                                                                                                                                                                                 | Hs.696109 | 55761 | 11 |
| -2.2 | -         | BF589251  | 227776_at   | Alkaline ceramidase 3                                                                                                                                                                                                         |           |       |    |
| -2.2 | ARMCX2    | NM_014782 | 203404_at   | Armadillo repeat containing, X-linked 2                                                                                                                                                                                       | Hs.48924  | 9823  | X  |
| -2.2 | NOTCH4    | AI743713  | 205247_at   | Notch homolog 4 (Drosophila)                                                                                                                                                                                                  | Hs.436100 | 4855  | 6  |
| -2.2 | C13orf15  | NM_014059 | 218723_s_at | Chromosome 13 open reading frame 15                                                                                                                                                                                           | Hs.507866 | 28984 | 13 |
| -2.2 | CNTN1     | U07820    | 211203_s_at | Contactin 1                                                                                                                                                                                                                   | Hs.143434 | 1272  | 12 |
| -2.2 | LZTS1     | BE312985  | 222107_x_at | Leucine zipper, putative tumor suppressor 1                                                                                                                                                                                   | Hs.521432 | 11178 | 8  |
| -2.2 | GRB2      | AF246238  | 223049_at   | Growth factor receptor-bound protein 2                                                                                                                                                                                        |           |       |    |
| -2.2 | JKAMP     | AF151047  | 223215_s_at | Chromosome 14 open reading frame 100                                                                                                                                                                                          |           |       |    |
| -2.3 | -         | BF675979  | 239355_at   | Transcribed locus                                                                                                                                                                                                             |           |       |    |
| -2.3 | CAPRIN2   | NM_023925 | 218456_at   | Caprin family member 2                                                                                                                                                                                                        | Hs.234355 | 65981 | 12 |
| -2.3 | AIM1      | U83115    | 212543_at   | Absent in melanoma 1                                                                                                                                                                                                          | Hs.643590 | 202   | 6  |
| -2.3 | RIPK2     | AF064824  | 209545_s_at | Receptor-interacting serine-threonine kinase 2                                                                                                                                                                                | Hs.103755 | 8767  | 8  |
| -2.3 | -         | AI683552  | 217679_x_at | Consensus includes gb:A1683552 /FEA=EST /DB_XREF=gi:4893734 /DB_XREF=est:tx67h02.x1 /CLONE=IMAGE:2274675 /UG=Hs.201605 ESTs, Moderately similar to ALU8_HUMAN ALU SUBFAMILY SX SEQUENCE CONTAMINATION WARNING ENTRY H.sapiens | -         | -     | -  |
| -2.3 | TXNDC17   | BC006405  | 224511_s_at | Thioredoxin domain containing 17                                                                                                                                                                                              |           |       |    |
| -2.3 | LOC129851 | AF131743  | 224628_at   | Chromosome 2 open reading frame 30                                                                                                                                                                                            |           |       |    |
| -2.3 | -         | AA001203  | 224765_at   | Male-specific lethal 1 homolog (Drosophila)                                                                                                                                                                                   |           |       |    |
| -2.3 | LETMD1    | NM_015416 | 207170_s_at | LETM1 domain containing 1                                                                                                                                                                                                     | Hs.655272 | 25875 | 12 |
| -2.3 | RARA      | AI806984  | 203749_s_at | Retinoic acid receptor, alpha                                                                                                                                                                                                 | Hs.654583 | 5914  | 17 |
| -2.3 | ESRP1     | NM_017697 | 219121_s_at | Epithelial splicing regulatory protein 1                                                                                                                                                                                      | Hs.487471 | 54845 | 8  |

### Down-Regulated Transcripts (U133A 133B)

|      |           |           |             |                                                                                                                       |           |        |    |
|------|-----------|-----------|-------------|-----------------------------------------------------------------------------------------------------------------------|-----------|--------|----|
| -2.3 | -         | AV761453  | 222282_at   | Consensus includes gb:AV761453 /FEA=EST /DB_XREF=gi:10919301 /DB_XREF=est:AV761453 /CLONE=MDSBZA03 /UG=Hs.294014 ESTs | -         | -      | -  |
| -2.3 | RPL31     | BC001663  | 221593_s_at | Ribosomal protein L31                                                                                                 | Hs.469473 | 6160   | 2  |
| -2.3 | BEX2      | AF251053  | 224367_at   | Brain expressed X-linked 2                                                                                            |           |        |    |
| -2.3 | SELK      | AF085359  | 223070_at   | Selenoprotein K                                                                                                       |           |        |    |
| -2.3 | SSBP1     | BE220360  | 214060_at   | Single-stranded DNA binding protein 1                                                                                 | Hs.490394 | 6742   | 7  |
| -2.3 | BRD2      | D42040    | 208686_s_at | Bromodomain containing 2                                                                                              | Hs.75243  | 6046   | 6  |
| -2.3 | -         | AV715993  | 226007_at   | Iron-sulfur cluster assembly 2 homolog ( <i>S. cerevisiae</i> )                                                       |           |        |    |
| -2.3 | IER3IP1   | AL136667  | 223071_at   | Immediate early response 3 interacting protein 1                                                                      |           |        |    |
| -2.3 | RPL13P12  | AW574664  | 212191_x_at | Ribosomal protein L13 pseudogene 12                                                                                   | Hs.448879 | 388344 | 17 |
| -2.3 | ZNF136    | NM_003437 | 206240_s_at | Zinc finger protein 136                                                                                               | Hs.479874 | 7695   | 19 |
| -2.3 | -         | BG167841  | 227066_at   | MOB1, Mps One Binder kinase activator-like 2C (yeast)                                                                 |           |        |    |
| -2.3 | SEPT2     | NM_004404 | 200015_s_at | Septin 2                                                                                                              |           |        |    |
| -2.3 | ACAP1     | NM_014716 | 205213_at   | ArfGAP with coiled-coil, ankyrin repeat and PH domains 1                                                              | Hs.337242 | 9744   | 17 |
| -2.3 | SNX26     | AL137579  | 213827_at   | Sorting nexin 26                                                                                                      | Hs.515364 | 115703 | 19 |
| -2.4 | -         | AI307808  | 226106_at   | Ring finger protein 141                                                                                               |           |        |    |
| -2.4 | LOC112488 | AK000490  | 222958_s_at | DEP domain containing 1                                                                                               |           |        |    |
| -2.4 | MSH5      | AF034759  | 210410_s_at | MutS homolog 5 ( <i>E. coli</i> )                                                                                     | Hs.647011 | 4439   | 6  |
| -2.4 | MKNK2     | NM_017572 | 218205_s_at | MAP kinase interacting serine/threonine kinase 2                                                                      | Hs.515032 | 2872   | 19 |
| -2.4 | HIST1H2AL | NM_003511 | 214554_at   | Histone cluster 1, H2al                                                                                               | Hs.233568 | 8332   | 6  |
| -2.4 | LZTFL1    | NM_020347 | 218437_s_at | Leucine zipper transcription factor-like 1                                                                            | Hs.30824  | 54585  | 3  |
| -2.4 | -         | BE644830  | 225171_at   | Rho GTPase activating protein 18                                                                                      |           |        |    |
| -2.4 | ANKRD36   | AB046861  | 214723_x_at | ankyrin repeat domain 36B                                                                                             |           | 57730  |    |
| -2.4 | KDM2A     | AK024505  | 208987_s_at | Lysine (K)-specific demethylase 2A                                                                                    | Hs.124147 | 22992  | 11 |
| -2.4 | SFRS15    | AA648521  | 222310_at   | Splicing factor, arginine/serine-rich 15                                                                              | Hs.17255  | 57466  | 21 |
| -2.4 | -         | N37023    | 225407_at   | Myelin basic protein                                                                                                  |           |        |    |
| -2.4 | IER3      | NM_003897 | 201631_s_at | Immediate early response 3                                                                                            | Hs.591785 | 8870   | 6  |
| -2.4 | CSNK1E    | NM_001894 | 202332_at   | Casein kinase 1, epsilon                                                                                              | Hs.474833 | 1454   | 22 |
| -2.4 | -         | NM_021730 | 218380_at   | NLR family, pyrin domain containing 1                                                                                 |           | 22861  |    |
| -2.4 | CTH       | NM_001902 | 206085_s_at | Cystathionase (cystathionine gamma-lyase)                                                                             | Hs.19904  | 1491   | 1  |
| -2.4 | CTPTM1L   | AB045223  | 223020_at   | CLPTM1-like                                                                                                           |           |        |    |
| -2.4 | PLEKHA1   | NM_021622 | 219024_at   | Pleckstrin homology domain containing, family A (phosphoinositide binding specific) member 1                          | Hs.643512 | 59338  | 10 |
| -2.4 | -         | AI640157  | 229801_at   | Chromosome 10 open reading frame 47                                                                                   |           |        |    |
| -2.4 | FMNL1     | NM_005892 | 204789_at   | Formin-like 1                                                                                                         | Hs.100217 | 752    | 17 |
| -2.4 | C14orf119 | AF061731  | 223060_at   | Chromosome 14 open reading frame 119                                                                                  |           |        |    |
| -2.4 | CYP1A1    | NM_000499 | 205749_at   | Cytochrome P450, family 1, subfamily A, polypeptide 1                                                                 | Hs.72912  | 1543   | 15 |
| -2.4 | RUNX3     | NM_004350 | 204197_s_at | Runt-related transcription factor 3                                                                                   | Hs.170019 | 864    | 1  |
| -2.4 | SERTAD2   | BG107456  | 220656_s_at | SERTA domain containing 2                                                                                             | Hs.591569 | 9792   | 2  |
| -2.4 | -         | BG250585  | 235740_at   | Transcribed locus                                                                                                     |           |        |    |
| -2.4 | -         | AI963476  | 225585_at   | RAP2A, member of RAS oncogene family                                                                                  |           |        |    |
| -2.4 | TCF7L2    | AA664011  | 216037_x_at | Transcription factor 7-like 2 (T-cell specific, HMG-box)                                                              | Hs.593995 | 6934   | 10 |
| -2.4 | C16orf45  | BE299456  | 212736_at   | Chromosome 16 open reading frame 45                                                                                   | Hs.401798 | 89927  | 16 |
| -2.4 | GCH1      | NM_000161 | 204224_s_at | GTP cyclohydrolase 1                                                                                                  | Hs.86724  | 2643   | 14 |
| -2.4 | -         | AA632295  | 227461_at   | Stonin 2                                                                                                              |           |        |    |
| -2.4 | -         | AI676103  | 222533_at   | Cereblon                                                                                                              |           |        |    |
| -2.4 | TOB2      | AB051450  | 222243_s_at | Transducer of ERBB2, 2                                                                                                | Hs.719120 | 10766  | 22 |
| -2.5 | FLT1      | AA058828  | 222033_s_at | Fms-related tyrosine kinase 1 (vascular endothelial growth factor/vascular permeability factor receptor)              | Hs.654360 | 2321   | 13 |
| -2.5 | EPDR1     | BC000686  | 223253_at   | Ependymin related protein 1 (zebrafish)                                                                               |           |        |    |
| -2.5 | CYTH1     | NM_004762 | 202880_s_at | Cytohesin 1                                                                                                           | Hs.191215 | 9267   | 17 |
| -2.5 | C6orf62   | AW972292  | 222309_at   | Chromosome 6 open reading frame 62                                                                                    | Hs.519930 | 81688  | 6  |
| -2.5 | IL23A     | M15564    | 210915_x_at | Interleukin 23, alpha subunit p19                                                                                     | Hs.621281 | 51561  | 12 |
| -2.5 | -         | BF211019  | 224637_at   | Dolichyl-diphosphooligosaccharide-protein glycosyltransferase subunit 4                                               |           |        |    |
| -2.5 | -         | AW088063  | 229610_at   | Cytoskeleton associated protein 2-like                                                                                |           |        |    |
| -2.5 | UNC84A    | BE615699  | 214169_at   | Unc-84 homolog A ( <i>C. elegans</i> )                                                                                | Hs.438072 | 23353  | 7  |
| -2.5 | ENGASE    | NM_022759 | 220349_s_at | endo-beta-N-acetylglucosaminidase                                                                                     |           | 64772  |    |
| -2.5 | LPAR2     | NM_004720 | 206722_s_at | Lysophosphatidic acid receptor 2                                                                                      | Hs.122575 | 9170   | 19 |
| -2.5 | FOXN3     | NM_005197 | 205022_s_at | Forkhead box N3                                                                                                       | Hs.434286 | 1112   | 14 |
| -2.5 | RPL10     | AW057781  | 221989_at   | Ribosomal protein L10                                                                                                 | Hs.534404 | 6134   | X  |
| -2.5 | -         | BG432489  | 225460_at   | SEC22 vesicle trafficking protein homolog C ( <i>S. cerevisiae</i> )                                                  |           |        |    |
| -2.5 | -         | AK026659  | 231925_at   | CDNA: FLI23006 fis, clone LNG00414                                                                                    |           |        |    |
| -2.5 | -         | BF003112  | 228725_x_at | Protein arginine methyltransferase 2                                                                                  |           |        |    |
| -2.5 | LOC92334  | AK025925  | 224748_at   | WD repeat domain 68                                                                                                   |           |        |    |
| -2.5 | IL18R1    | NM_003855 | 206618_at   | Interleukin 18 receptor 1                                                                                             | Hs.469521 | 8809   | 2  |

### Down-Regulated Transcripts (U133A 133B)

|      |           |           |             |                                                                              |           |        |    |
|------|-----------|-----------|-------------|------------------------------------------------------------------------------|-----------|--------|----|
| -2.5 | PFN2      | NM_002628 | 204992_s_at | Profilin 2                                                                   | Hs.91747  | 5217   | 3  |
| -2.6 | LOC728844 | AW450929  | 221919_at   | Hypothetical LOC728844                                                       | Hs.656277 | 728844 | 12 |
| -2.6 | MXD4      | BC002713  | 210778_s_at | MAX dimerization protein 4                                                   | Hs.655020 | 10608  | 4  |
| -2.6 | FGFR1     | M60485    | 211535_s_at | Fibroblast growth factor receptor 1                                          | Hs.264887 | 2260   | 8  |
| -2.6 | -         | BF975327  | 225849_s_at | SFT2 domain containing 1                                                     |           |        |    |
| -2.6 | SFRS11    | AW241752  | 213742_at   | Splicing factor, arginine/serine-rich 11                                     | Hs.479693 | 9295   | 1  |
| -2.6 | JMJD1C    | AI694023  | 221763_at   | Jumonji domain containing 1C                                                 | Hs.413416 | 221037 | 10 |
| -2.6 | -         | BG496998  | 225684_at   | Family with sequence similarity 33, member A                                 |           |        |    |
| -2.6 | SIAH1     | AV700132  | 221834_at   | Seven in absentia homolog 1 (Drosophila)                                     | Hs.295923 | 6477   | 16 |
| -2.6 | MOB1B     | AL162039  | 225997_at   | MOB1, Mps One Binder kinase activator-like 1A (yeast)                        |           |        |    |
| -2.6 | -         | AA613031  | 225447_at   | Glycerol-3-phosphate dehydrogenase 2 (mitochondrial)                         |           |        |    |
| -2.6 | -         | AV715391  | 225297_at   | HAUS augmin-like complex, subunit 1                                          |           |        |    |
| -2.6 | C7orf23   | NM_024315 | 204215_at   | Chromosome 7 open reading frame 23                                           | Hs.719226 | 79161  | 7  |
| -2.6 | GAB2      | NM_012296 | 203853_s_at | GRB2-associated binding protein 2                                            | Hs.429434 | 9846   | 11 |
| -2.6 | PLCL2     | AL117515  | 213309_at   | Phospholipase C-like 2                                                       | Hs.202010 | 23228  | 3  |
| -2.6 | DUSP10    | N36770    | 221563_at   | Dual specificity phosphatase 10                                              | Hs.497822 | 11221  | 1  |
| -2.6 | FLJ10357  | R42449    | 58780_s_at  | Hypothetical protein FLJ10357                                                | Hs.35125  | 55701  | 14 |
| -2.6 | RRAGB     | NM_016656 | 205540_s_at | Ras-related GTP binding B                                                    | Hs.50282  | 10325  | X  |
| -2.6 | -         | Y09908    | 217371_s_at | interleukin 15                                                               | -         | -      | -  |
| -2.6 | RARRES2   | BC000069  | 209496_at   | Retinoic acid receptor responder (tazarotene induced) 2                      | Hs.647064 | 5919   | 7  |
| -2.6 | -         | BF244081  | 224602_at   | Chromosome 4 open reading frame 3                                            |           |        |    |
| -2.6 | LOX       | L16895    | 215446_s_at | lysyl oxidase                                                                | -         | -      | -  |
| -2.6 | NINJ1     | NM_004148 | 203045_at   | Ninjurin 1                                                                   | Hs.494457 | 4814   | 9  |
| -2.7 | SMAD7     | NM_005904 | 204790_at   | SMAD family member 7                                                         | Hs.465087 | 4092   | 18 |
| -2.7 | CD53      | NM_000560 | 203416_at   | CD53 molecule                                                                | Hs.443057 | 963    | 1  |
| -2.7 | -         | BF512139  | 225367_at   | Phosphoglucomutase 2                                                         |           |        |    |
| -2.7 | -         | W47179    | 213275_x_at | cathepsin B                                                                  | -         | -      | -  |
| -2.7 | -         | AI917716  | 228253_at   | Lysyl oxidase-like 3                                                         |           |        |    |
| -2.7 | NBL1      | D28124    | 37005_at    | Neuroblastoma, suppression of tumorigenicity 1                               | Hs.654502 | 4681   | 1  |
| -2.7 | ZNF146    | NM_007145 | 200050_at   | Zinc finger protein 146                                                      |           |        |    |
| -2.7 | DNAH3     | AL096732  | 215266_at   | Dynein, axonemal, heavy chain 3                                              | Hs.526500 | 55567  | 16 |
| -2.7 | GNA15     | NM_002068 | 205349_at   | Guanine nucleotide binding protein (G protein), alpha 15 (Gq class)          | Hs.73797  | 2769   | 19 |
| -2.7 | ICAM1     | NM_000201 | 202638_s_at | Intercellular adhesion molecule 1                                            | Hs.643447 | 3383   | 19 |
| -2.7 | -         | AI889717  | 242282_at   | Zinc finger protein, multitype 1                                             |           |        |    |
| -2.7 | -         | AL573637  | 225583_at   | UDP-glucuronate decarboxylase 1                                              |           |        |    |
| -2.7 | CCRK      | NM_012119 | 205271_s_at | Cell cycle related kinase                                                    | Hs.522274 | 23552  | 9  |
| -2.7 | -         | BE348597  | 226464_at   | Chromosome 3 open reading frame 58                                           |           |        |    |
| -2.7 | SNED1     | N73970    | 213488_at   | Sushi, nidogen and EGF-like domains 1                                        | Hs.471834 | 25992  | 2  |
| -2.7 | RPS19     | BC000023  | 202648_at   | Ribosomal protein S19                                                        | Hs.438429 | 6223   | 19 |
| -2.8 | -         | BE875567  | 225059_at   | Angiotensin II receptor-associated protein                                   |           |        |    |
| -2.8 | TAF1D     | BC001972  | 221580_s_at | TATA box binding protein (TBP)-associated factor, RNA polymerase I, D, 41kDa | -         | 79101  | -  |
| -2.8 | NEDD1     | AA236927  | 234984_at   | Neural precursor cell expressed, developmentally down-regulated 1            |           |        |    |
| -2.8 | -         | NM_024679 | 219145_at   | latrophilin 1                                                                | -         | 22859  | -  |
| -2.8 | EZR       | J05021    | 208623_s_at | Ezrin                                                                        | Hs.487027 | 7430   | 6  |
| -2.8 | ARAP2     | AB011152  | 213618_at   | ArfGAP with RhoGAP domain, ankyrin repeat and PH domain 2                    | Hs.479451 | 116984 | 4  |
| -2.8 | ATP2B4    | AW517686  | 212135_s_at | ATPase, Ca++ transporting, plasma membrane 4                                 | Hs.343522 | 493    | 1  |
| -2.8 | CDH7      | NM_004361 | 220679_s_at | Cadherin 7, type 2                                                           | Hs.657522 | 1005   | 18 |
| -2.9 | C9orf91   | BF969986  | 221865_at   | Chromosome 9 open reading frame 91                                           | Hs.522357 | 203197 | 9  |
| -2.9 | SNAPIN    | BC000761  | 223066_at   | SNAP-associated protein                                                      |           |        |    |
| -2.9 | -         | BE551691  | 224844_at   | SLAIN motif family, member 2                                                 |           |        |    |
| -2.9 | SVIL      | NM_003174 | 202565_s_at | Supervillin                                                                  | Hs.499209 | 6840   | 10 |
| -2.9 | -         | AU151357  | 228456_s_at | Hypothetical protein LOC149832                                               |           |        |    |
| -2.9 | TEKT2     | AB033823  | 210323_at   | Tektin 2 (testicular)                                                        | Hs.127111 | 27285  | 1  |
| -2.9 | SGK2      | NM_016276 | 220357_s_at | Serum/glucocorticoid regulated kinase 2                                      | Hs.300863 | 10110  | 20 |
| -2.9 | TCF4      | BF592782  | 212386_at   | Transcription factor 4                                                       | Hs.605153 | 6925   | 18 |
| -2.9 | WDR33     | NM_018383 | 218851_s_at | WD repeat domain 33                                                          | Hs.620490 | 55339  | 2  |
| -2.9 | C16orf80  | NM_013242 | 217957_at   | Chromosome 16 open reading frame 80                                          | Hs.532755 | 29105  | 16 |
| -2.9 | -         | AA608749  | 228095_at   | PHD finger protein 14                                                        |           |        |    |
| -2.9 | -         | BF248364  | 228323_at   | Cancer susceptibility candidate 5                                            |           |        |    |
| -2.9 | ARG2      | NM_001172 | 203945_at   | Arginase, type II                                                            | Hs.708024 | 384    | 14 |
| -2.9 | -         | BE466926  | 217671_at   | Transcribed locus                                                            | Hs.673795 | -      | 9  |
| -2.9 | KLHL3     | NM_017415 | 221221_s_at | Kelch-like 3 (Drosophila)                                                    | Hs.655084 | 26249  | 5  |
| -2.9 | NLGN3     | NM_018977 | 219726_at   | Neurologin 3                                                                 | Hs.438877 | 54413  | X  |
| -2.9 | -         | BE220026  | 225240_s_at | Transcribed locus                                                            |           |        |    |
| -3.0 | -         | AW500180  | 225793_at   | Transcribed locus                                                            |           |        |    |

### Down-Regulated Transcripts (U133A 133B)

|      |           |           |             |                                                                                          |           |        |    |
|------|-----------|-----------|-------------|------------------------------------------------------------------------------------------|-----------|--------|----|
| -3.0 | TRA2B     | U87836    | 210180_s_at | Transformer 2 beta homolog (Drosophila)                                                  | Hs.533122 | 6434   | 3  |
| -3.0 | SLC5A5    | D87920    | 211123_at   | Solute carrier family 5 (sodium iodide symporter), member 5                              | Hs.584804 | 6528   | 19 |
| -3.0 | GDPD5     | AL041124  | 32502_at    | Glycerophosphodiester phosphodiesterase domain containing 5                              | Hs.503297 | 81544  | 11 |
| -3.0 | TICAM1    | AF070530  | 213191_at   | Toll-like receptor adaptor molecule 1                                                    | Hs.29344  | 148022 | 19 |
| -3.0 | -         | BG250721  | 224606_at   | Kruppel-like factor 6                                                                    |           |        |    |
| -3.0 | KIAA0644  | NM_014817 | 205151_s_at | KIAA0644 gene product                                                                    | Hs.719240 | 9865   | 7  |
| -3.0 | -         | BF185904  | 226881_at   | GrpE-like 2, mitochondrial (E. coli)                                                     |           |        |    |
| -3.0 | CCNDBP1   | AF246144  | 223084_s_at | Cyclin D-type binding-protein 1                                                          |           |        |    |
| -3.1 | ADM       | NM_001124 | 202912_at   | Adrenomedullin                                                                           | Hs.441047 | 133    | 11 |
| -3.1 | DPT       | AI146848  | 213068_at   | Dermatopontin                                                                            | Hs.80552  | 1805   | 1  |
| -3.1 | BLNK      | NM_013314 | 207655_s_at | B-cell linker                                                                            | Hs.665244 | 29760  | 10 |
| -3.1 | RAPSN     | BC004196  | 211570_s_at | Receptor-associated protein of the synapse                                               | Hs.81218  | 5913   | 11 |
| -3.1 | SLMAP     | AB046821  | 225243_s_at | Sarcolemma associated protein                                                            |           |        |    |
| -3.1 | HLA-DQB1  | AI583173  | 212998_x_at | Major histocompatibility complex, class II, DQ beta 1                                    | Hs.409934 | 3119   | 6  |
| -3.1 | KLHL12    | AK024412  | 225068_at   | Kelch-like 12 (Drosophila)                                                               |           |        |    |
| -3.1 | REPS2     | NM_004726 | 205645_at   | RALBP1 associated Eps domain containing 2                                                | Hs.186810 | 9185   | X  |
| -3.1 | C19orf33  | AF213678  | 223631_s_at | Chromosome 19 open reading frame 33                                                      |           |        |    |
| -3.1 | PIGA      | NM_002641 | 205281_s_at | Phosphatidylinositol glycan anchor biosynthesis, class A                                 | Hs.137154 | 5277   | X  |
| -3.1 | PRKRIP1   | NM_024653 | 218378_s_at | PRKR interacting protein 1 (IL11 inducible)                                              | Hs.406395 | 79706  | 7  |
| -3.1 | -         | AL520657  | 225052_at   | Transmembrane protein 203                                                                |           |        |    |
| -3.1 | ZNF10     | X52332    | 216350_s_at | Zinc finger protein 10                                                                   | Hs.507355 | 7556   | 12 |
| -3.1 | ZBTB20    | NM_015642 | 205383_s_at | Zinc finger and BTB domain containing 20                                                 | Hs.655108 | 26137  | 3  |
| -3.1 | -         | AI869704  | 225419_at   | Chromosome 7 open reading frame 11                                                       |           |        |    |
| -3.1 | DLK1      | U15979    | 209560_s_at | Delta-like 1 homolog (Drosophila)                                                        | Hs.533717 | 8788   | 14 |
| -3.1 | SKAP1     | NM_003726 | 205790_at   | Src kinase associated phosphoprotein 1                                                   | Hs.316931 | 8631   | 17 |
| -3.1 | -         | BG054744  | 226678_at   | Unc-13 homolog D (C. elegans)                                                            |           |        |    |
| -3.1 | EGR3      | NM_004430 | 206115_at   | Early growth response 3                                                                  | Hs.534313 | 1960   | 8  |
| -3.2 | SPCS3     | AL136660  | 222753_s_at | Signal peptidase complex subunit 3 homolog (S. cerevisiae)                               |           |        |    |
| -3.2 | HECA      | NM_016217 | 218603_at   | Headcase homolog (Drosophila)                                                            | Hs.197644 | 51696  | 6  |
| -3.2 | RAB18     | AL136734  | 223336_s_at | RAB18, member RAS oncogene family                                                        |           |        |    |
| -3.2 | -         | N64686    | 225904_at   | Chromosome 1 open reading frame 96                                                       |           |        |    |
| -3.2 | IER5      | NM_016545 | 218611_at   | Immediate early response 5                                                               | Hs.716489 | 51278  | 1  |
| -3.2 | C14orf138 | NM_024558 | 218940_at   | Chromosome 14 open reading frame 138                                                     | Hs.558541 | 79609  | 14 |
| -3.2 | -         | AV734582  | 226544_x_at | muted homolog (mouse)                                                                    |           |        |    |
| -3.2 | GNB2L1    | AA443762  | 222034_at   | Guanine nucleotide binding protein (G protein), beta polypeptide 2-like 1                | Hs.5662   | 10399  | 5  |
| -3.2 | SH3BP4    | AF015043  | 222258_s_at | SH3-domain binding protein 4                                                             | Hs.516777 | 23677  | 2  |
| -3.2 | FBX05     | AK026197  | 234863_x_at | F-box protein 5                                                                          |           |        |    |
| -3.2 | PITPNM2   | AB040890  | 232950_s_at | Phosphatidylinositol transfer protein, membrane-associated 2                             |           |        |    |
| -3.2 | -         | AV756867  | 225693_s_at | Calmodulin binding transcription activator 1                                             |           |        |    |
| -3.2 | -         | AI418253  | 242201_at   | Postmeiotic segregation increased 2-like 5                                               |           |        |    |
| -3.2 | MAP3K14   | NM_003954 | 205192_at   | Mitogen-activated protein kinase kinase kinase 14                                        | Hs.404183 | 9020   | 17 |
| -3.2 | CXXC5     | AK001782  | 233955_x_at | CXXC finger 5                                                                            |           |        |    |
| -3.2 | ADAM8     | NM_001109 | 205180_s_at | ADAM metallopeptidase domain 8                                                           | Hs.501574 | 101    | 10 |
| -3.2 | LTBP4     | NM_003573 | 204442_x_at | Latent transforming growth factor beta binding protein 4                                 | Hs.466766 | 8425   | 19 |
| -3.3 | CD79B     | NM_000626 | 205297_s_at | CD79b molecule, immunoglobulin-associated beta                                           | Hs.89575  | 974    | 17 |
| -3.3 | -         | L34409    | 215746_at   | (clone B3B3E13) chromosome 4p16.3 DNA fragment                                           | Hs.660165 | -      | 4  |
| -3.3 | CDC42     | M35543    | 210232_at   | Cell division cycle 42 (GTP binding protein, 25kDa)                                      | Hs.690198 | 998    | 1  |
| -3.3 | -         | BE967331  | 225621_at   | Asparagine-linked glycosylation 2, alpha-1,3-mannosyltransferase homolog (S. cerevisiae) |           |        |    |
| -3.3 | KIAA0368  | AB002366  | 212427_at   | KIAA0368                                                                                 | Hs.368255 | 23392  | 9  |
| -3.3 | -         | NM_024530 | 218881_s_at | FOS-like antigen 2                                                                       |           | 2355   | -  |
| -3.3 | KHDRBS3   | AF069681  | 209781_s_at | KH domain containing, RNA binding, signal transduction associated 3                      | Hs.444558 | 10656  | 8  |
| -3.3 | CP5F2     | AK023583  | 225994_at   | Cleavage and polyadenylation specific factor 2, 100kDa                                   |           |        |    |
| -3.3 | -         | BF693302  | 238451_at   | membrane protein, palmitoylated 7 (MAGUK p55 subfamily member 7)                         |           |        |    |
| -3.3 | SLC38A3   | NM_006841 | 205972_at   | Solute carrier family 38, member 3                                                       | Hs.76460  | 10991  | 3  |
| -3.3 | TBC1D23   | AK001750  | 225121_at   | TBC1 domain family, member 23                                                            |           |        |    |
| -3.3 | -         | AA628423  | 224861_at   | Transcribed locus                                                                        |           |        |    |
| -3.3 | -         | AA524669  | 227074_at   | Hypothetical protein LOC100131564                                                        |           |        |    |
| -3.3 | -         | BF055271  | 222472_at   | Aftiphilin                                                                               |           |        |    |
| -3.3 | KLF10     | NM_005655 | 202393_s_at | Kruppel-like factor 10                                                                   | Hs.435001 | 7071   | 8  |
| -3.4 | -         | BE964043  | 200719_at   | S-phase kinase-associated protein 1                                                      | -         | -      | -  |
| -3.4 | ZBTB10    | NM_023929 | 219312_s_at | Zinc finger and BTB domain containing 10                                                 | Hs.591868 | 65986  | 8  |
| -3.4 | -         | BE222668  | 227791_at   | Solute carrier family 9 (sodium/hydrogen exchanger), member 9                            |           |        |    |
| -3.4 | -         | AA628398  | 226390_at   | STAR-related lipid transfer (START) domain containing 4                                  |           |        |    |
| -3.4 | -         | AW270158  | 226345_at   | CDNA FLJ12853 fis, clone NT2RP2003456                                                    |           |        |    |

**Down-Regulated Transcripts (U133A 133B)**

|      |           |           |             |                                                                                                     |           |        |    |
|------|-----------|-----------|-------------|-----------------------------------------------------------------------------------------------------|-----------|--------|----|
| -3.4 | -         | AA029155  | 235103_at   | Mannosidase, alpha, class 2A, member 1                                                              |           |        |    |
| -3.4 | FOXL2     | NM_023067 | 220102_at   | Forkhead box L2                                                                                     | Hs.289292 | 668    | 3  |
| -3.4 | EMP1      | BF445047  | 213895_at   | Epithelial membrane protein 1                                                                       | Hs.707901 | 2012   | 12 |
| -3.4 | SELL      | NM_000655 | 204563_at   | Selectin L                                                                                          | Hs.82848  | 6402   | 1  |
| -3.4 | VTA1      | BC005937  | 224437_s_at | Vps20-associated 1 homolog (S. cerevisiae)                                                          |           |        |    |
| -3.4 | PPP1R15A  | NM_014330 | 202014_at   | Protein phosphatase 1, regulatory (inhibitor) subunit 15A                                           | Hs.631593 | 23645  | 19 |
| -3.4 | -         | AU147889  | 222180_at   | CDNA FLJ14122 fis, clone MAMMA1002033                                                               | Hs.658859 | -      | 18 |
| -3.4 | ZNF394    | AK022360  | 214714_at   | Zinc finger protein 394                                                                             | Hs.386324 | 84124  | 7  |
| -3.4 | -         | AW469790  | 227708_at   | Eukaryotic translation elongation factor 1 alpha 1                                                  |           |        |    |
| -3.4 | C12orf23  | AK001731  | 224759_s_at | Chromosome 12 open reading frame 23                                                                 |           |        |    |
| -3.5 | ZNF331    | NM_018555 | 219228_at   | Zinc finger protein 331                                                                             | Hs.185674 | 55422  | 19 |
| -3.5 | -         | AW450293  | 226823_at   | Phosphatase and actin regulator 4                                                                   |           |        |    |
| -3.5 | -         | AL578668  | 225101_s_at | Sorting nexin 14                                                                                    |           |        |    |
| -3.5 | DNITP1    | AL050348  | 224825_at   | deoxynucleotidyltransferase, terminal, interacting protein 1                                        |           |        |    |
| -3.5 | -         | AA761169  | 225412_at   | Transmembrane protein 87B                                                                           |           |        |    |
| -3.5 | TOB1      | AA675892  | 202704_at   | Transducer of ERBB2, 1                                                                              | Hs.719207 | 10140  | 17 |
| -3.5 | -         | BG150485  | 228754_at   | Solute carrier family 6 (neurotransmitter transporter, taurine), member 6                           |           |        |    |
| -3.5 | -         | AW503390  | 217682_at   | CDNA FLJ37032 fis, clone BRACE2011265                                                               | Hs.654689 | -      | 16 |
| -3.5 | APOL3     | NM_014349 | 221087_s_at | Apolipoprotein L, 3                                                                                 | Hs.474737 | 80833  | 22 |
| -3.5 | IDS       | NM_000202 | 202439_s_at | Iduronate 2-sulfatase                                                                               | Hs.460960 | 3423   | X  |
| -3.5 | IWS1      | AK001717  | 224768_at   | IWS1 homolog (S. cerevisiae)                                                                        |           |        |    |
| -3.5 | PHF23     | BC002509  | 223081_at   | PHD finger protein 23                                                                               |           |        |    |
| -3.5 | HSPA1A    | NM_005345 | 200799_at   | Heat shock 70kDa protein 1A                                                                         | Hs.274402 | 3303   | 6  |
| -3.5 | -         | AI743979  | 224819_at   | Transcription elongation factor A (SII)-like 8                                                      |           |        |    |
| -3.5 | -         | AL520900  | 224981_at   | Transmembrane protein 219                                                                           |           |        |    |
| -3.5 | CRYGD     | NM_006891 | 207532_at   | Crystallin, gamma D                                                                                 | Hs.546247 | 1421   | 2  |
| -3.6 | ITGA9     | NM_002207 | 206009_at   | Integrin, alpha 9                                                                                   | Hs.113157 | 3680   | 3  |
| -3.6 | HIST1H2AM | NM_003514 | 214481_at   | Histone cluster 1, H2am                                                                             | Hs.134999 | 8336   | 6  |
| -3.6 | -         | AI681917  | 229638_at   | Iroquois homeobox 3                                                                                 |           |        |    |
| -3.6 | -         | BE907429  | 225148_at   | Ribosomal protein S19 binding protein 1                                                             |           |        |    |
| -3.6 | UBXN1     | BC001372  | 210623_at   | UBX domain protein 1                                                                                | Hs.351296 | 51035  | 11 |
| -3.6 | ZNF609    | AW165979  | 212620_at   | Zinc finger protein 609                                                                             | Hs.719276 | 23060  | 15 |
| -3.6 | DICER1    | AK001827  | 216260_at   | Dicer 1, ribonuclease type III                                                                      | Hs.87889  | 23405  | 14 |
| -3.7 | GNAS      | AA401492  | 214157_at   | GNAS complex locus                                                                                  | Hs.125898 | 2778   | 20 |
| -3.7 | MRPL27    | AB049647  | 224330_s_at | Mitochondrial ribosomal protein L27                                                                 |           |        |    |
| -3.7 | -         | AL162044  | 216456_at   | MRNA; cDNA DKFpZ761L0812 (from clone DKFpZ761L0812); partial cds                                    | Hs.675517 | -      | 13 |
| -3.7 | SOX4      | BG528420  | 201416_at   | SRY (sex determining region Y)-box 4                                                                | Hs.643910 | 6659   | 6  |
| -3.7 | MCL1      | BF981280  | 214056_at   | Myeloid cell leukemia sequence 1 (BCL2-related)                                                     | Hs.719112 | 4170   | 1  |
| -3.7 | COL3A1    | AU144167  | 215076_s_at | Collagen, type III, alpha 1                                                                         | Hs.443625 | 1281   | 2  |
| -3.7 | -         | BF675985  | 225783_at   | Ubiquitin-conjugating enzyme E2F (putative)                                                         |           |        |    |
| -3.7 | OSR2      | AI811298  | 213568_at   | Odd-skipped related 2 (Drosophila)                                                                  | Hs.253247 | 116039 | 8  |
| -3.7 | BTBD10    | BC005071  | 223174_at   | BTB (POZ) domain containing 10                                                                      |           |        |    |
| -3.7 | -         | AV715153  | 226921_at   | Ubiquitin protein ligase E3 component n-recognin 1                                                  |           |        |    |
| -3.7 | -         | N25727    | 227305_s_at | Smith-Magenis syndrome chromosome region, candidate 8                                               |           |        |    |
| -3.7 | ADAM28    | NM_021777 | 208268_at   | ADAM metalloproteinase domain 28                                                                    | Hs.174030 | 10863  | 8  |
| -3.7 | -         | AI160540  | 225755_at   | Kelch domain containing 8B                                                                          |           |        |    |
| -3.7 | -         | AA521267  | 213146_at   | lysine (K)-specific demethylase 6B                                                                  | -         | -      | -  |
| -3.8 | -         | AW574798  | 228167_at   | Transcribed locus                                                                                   |           |        |    |
| -3.8 | -         | AL524045  | 224643_at   | Proline-rich coiled-coil 1                                                                          |           |        |    |
| -3.8 | AASS      | AF229180  | 210852_s_at | Amino adipate-semialdehyde synthase                                                                 | Hs.156738 | 10157  | 7  |
| -3.8 | -         | AF070581  | 214078_at   | Primary neuroblastoma cDNA, clone:Nbla04246, full insert sequence                                   | Hs.655757 | -      | X  |
| -3.8 | FOS       | BC004490  | 209189_at   | V-fos FBJ murine osteosarcoma viral oncogene homolog                                                | Hs.707896 | 2353   | 14 |
| -3.8 | -         | BE855799  | 227230_s_at | KIAA1211                                                                                            |           |        |    |
| -3.8 | -         | AL135396  | 225834_at   | Transcribed locus, strongly similar to NP_001094380.1 hypothetical protein LOC653820 [Homo sapiens] |           |        |    |
| -3.8 | SDHAF2    | BC002331  | 223048_at   | Chromosome 11 open reading frame 79                                                                 |           |        |    |
| -3.8 | -         | BF246131  | 225000_at   | Protein kinase, cAMP-dependent, regulatory, type II, alpha                                          |           |        |    |
| -3.8 | -         | AI208342  | 243318_at   | WD repeat domain 42A                                                                                |           |        |    |
| -3.8 | PTGER2    | NM_000956 | 206631_at   | Prostaglandin E receptor 2 (subtype EP2), 53kDa                                                     | Hs.2090   | 5732   | 14 |
| -3.8 | HEMGN     | AF130060  | 223669_at   | hemogen                                                                                             |           |        |    |
| -3.9 | -         | AI982535  | 227309_at   | YOD1 OTU deubiquinating enzyme 1 homolog (S. cerevisiae)                                            |           |        |    |
| -3.9 | KCNK6     | AF134149  | 223658_at   | Potassium channel, subfamily K, member 6                                                            |           |        |    |
| -3.9 | FAM124B   | NM_024785 | 220637_at   | Family with sequence similarity 124B                                                                | Hs.147585 | 79843  | 2  |
| -3.9 | YPEL5     | NM_016061 | 217783_s_at | Yippee-like 5 (Drosophila)                                                                          | Hs.515890 | 51646  | 2  |
| -3.9 | -         | AV662196  | 235509_at   | Chromosome 8 open reading frame 38                                                                  |           |        |    |



### Down-Regulated Transcripts (U133A 133B)

|      |              |           |             |                                                                                                        |           |           |    |
|------|--------------|-----------|-------------|--------------------------------------------------------------------------------------------------------|-----------|-----------|----|
| -3.9 | BMP2         | NM_001200 | 205290_s_at | Bone morphogenetic protein 2                                                                           | Hs.73853  | 650       | 20 |
| -3.9 | ZFP36        | NM_003407 | 201531_at   | Zinc finger protein 36, C3H type, homolog (mouse)                                                      | Hs.534052 | 7538      | 19 |
| -3.9 | FAM134B      | NM_019000 | 218532_s_at | Family with sequence similarity 134, member B                                                          | Hs.481704 | 54463     | 5  |
| -3.9 | SYNGR1       | BC000731  | 210613_s_at | Synaptogyrin 1                                                                                         | Hs.216226 | 9145      | 22 |
| -3.9 | FAIM3        | AI084226  | 221601_s_at | Fas apoptotic inhibitory molecule 3                                                                    | Hs.58831  | 9214      | 1  |
| -4.0 | -            | AI017106  | 224635_s_at | Baculoviral IAP repeat-containing 6                                                                    |           |           |    |
| -4.0 | -            | AI016855  | 241133_at   | T cell receptor beta variable 27                                                                       |           |           |    |
| -4.0 | -            | AI916948  | 235670_at   | Syntaxin 11                                                                                            |           |           |    |
| -4.0 | COMMD10      | BC005179  | 222637_at   | COMM domain containing 10                                                                              |           |           |    |
| -4.0 | HLF          | AI810712  | 204753_s_at | Hepatic leukemia factor                                                                                | Hs.196952 | 3131      | 17 |
| -4.0 | ACOX2        | NM_003500 | 205364_at   | Acyl-Coenzyme A oxidase 2, branched chain                                                              | Hs.444959 | 8309      | 3  |
| -4.0 | -            | BG168471  | 225102_at   | Monoglyceride lipase                                                                                   |           |           |    |
| -4.0 | -            | BG251521  | 213156_at   | Homo sapiens, clone IMAGE:4214654, mRNA                                                                | Hs.592414 | -         | 3  |
| -4.0 | -            | AV734839  | 227239_at   | Family with sequence similarity 126, member A                                                          |           |           |    |
| -4.0 | -            | BE858995  | 242648_at   | Transcribed locus                                                                                      |           |           |    |
| -4.0 | -            | AL528911  | 224608_s_at | Vacuolar protein sorting 25 homolog (S. cerevisiae)                                                    |           |           |    |
| -4.0 | OClAD1       | AF323665  | 223011_s_at | OClA domain containing 1                                                                               |           |           |    |
| -4.0 | -            | AA532655  | 229872_s_at | Transcribed locus, moderately similar to XP_001722851.1 PREDICTED: hypothetical protein [Homo sapiens] |           |           |    |
| -4.1 | -            | AI798098  | 226326_at   | Polycomb group ring finger 5                                                                           |           |           |    |
| -4.1 | BTG2         | NM_006763 | 201236_s_at | BTG family, member 2                                                                                   | Hs.519162 | 7832      | 1  |
| -4.1 | CD34         | M81104    | 209543_s_at | CD34 molecule                                                                                          | Hs.374990 | 947       | 1  |
| -4.1 | -            | AI341541  | 227407_at   | Transmembrane anterior posterior transformation 1                                                      |           |           |    |
| -4.1 | NR4A3        | NM_006981 | 207978_s_at | Nuclear receptor subfamily 4, group A, member 3                                                        | Hs.279522 | 8013      | 9  |
| -4.1 | -            | AV700721  | 224788_at   | ADP-ribosylation factor 6                                                                              |           |           |    |
| -4.1 | -            | AI559701  | 225386_s_at | Heterogeneous nuclear ribonucleoprotein L-like                                                         |           |           |    |
| -4.2 | -            | AW513835  | 224791_at   | ArfGAP with SH3 domain, ankyrin repeat and PH domain 1                                                 |           |           |    |
| -4.2 | -            | AA973551  | 226993_at   | Transcribed locus                                                                                      |           |           |    |
| -4.2 | -            | BG541668  | 226027_at   | Chromosome 9 open reading frame 119                                                                    |           |           |    |
| -4.2 | -            | AI188653  | 226275_at   | MAX dimerization protein 1                                                                             |           |           |    |
| -4.2 | -            | AI742043  | 228507_at   | CDNA FLJ37884 fis, clone BRSTN2012451                                                                  |           |           |    |
| -4.2 | TFPI         | AF021834  | 210665_at   | Tissue factor pathway inhibitor (lipoprotein-associated coagulation inhibitor)                         | Hs.516578 | 7035      | 2  |
| -4.2 | -            | BF969428  | 224862_at   | Guanine nucleotide binding protein (G protein), q polypeptide                                          |           |           |    |
| -4.2 | USP36        | NM_025090 | 220370_s_at | Ubiquitin specific peptidase 36                                                                        | Hs.464243 | 57602     | 17 |
| -4.2 | RNF125       | NM_017831 | 207735_at   | Ring finger protein 125                                                                                | Hs.633703 | 54941     | 18 |
| -4.2 | ICAM3        | NM_002162 | 204949_at   | Intercellular adhesion molecule 3                                                                      | Hs.654563 | 3385      | 19 |
| -4.2 | FLJ14107     | NM_025026 | 207287_at   | hypothetical LOC80094                                                                                  | -         | 80094     | -  |
| -4.2 | SOD2         | AL050388  | 215078_at   | Superoxide dismutase 2, mitochondrial                                                                  | Hs.487046 | 6648      | 6  |
| -4.2 | RGS3         | NM_017790 | 220300_at   | Regulator of G-protein signaling 3                                                                     | Hs.494875 | 5998      | 9  |
| -4.2 | FAM117A      | NM_030802 | 221249_s_at | Family with sequence similarity 117, member A                                                          | Hs.514308 | 81558     | 17 |
| -4.2 | HIST1H1D     | NM_005320 | 214537_at   | Histone cluster 1, H1d                                                                                 | Hs.136857 | 3007      | 6  |
| -4.3 | ZMYM2        | AL136621  | 210281_s_at | Zinc finger, MYM-type 2                                                                                | Hs.644041 | 7750      | 13 |
| -4.3 | -            | BF439522  | 226276_at   | Transmembrane protein 167A                                                                             |           |           |    |
| -4.3 | ARMC1        | AK024053  | 222550_at   | Armadillo repeat containing 1                                                                          |           |           |    |
| -4.3 | MRPS36       | AF271777  | 224302_s_at | mitochondrial ribosomal protein S36                                                                    |           |           |    |
| -4.3 | -            | AI244908  | 227697_at   | Suppressor of cytokine signaling 3                                                                     |           |           |    |
| -4.3 | -            | AI808746  | 227418_at   | KIAA1826                                                                                               |           |           |    |
| -4.3 | MAGEL2       | NM_019066 | 219894_at   | MAGE-like 2                                                                                            | Hs.141496 | 54551     | 15 |
| -4.3 | -            | AI890604  | 226175_at   | Tetratricopeptide repeat domain 9C                                                                     |           |           |    |
| -4.3 | -            | W93523    | 238633_at   | Enhancer of polycomb homolog 1 (Drosophila)                                                            |           |           |    |
| -4.3 | -            | AI627538  | 225313_at   | Chromosome 20 open reading frame 177                                                                   |           |           |    |
| -4.3 | -            | AL530596  | 226531_at   | ORAI calcium release-activated calcium modulator 1                                                     |           |           |    |
| -4.4 | -            | W74622    | 229871_at   | Sterile alpha motif domain containing 4B                                                               |           |           |    |
| -4.4 | SFPQ         | AL558875  | 214016_s_at | Splicing factor proline/glutamine-rich (polypyrimidine tract binding protein associated)               | Hs.355934 | 6421      | 1  |
| -4.4 | TGM2         | AL031651  | 201042_at   | transglutaminase 2 (C polypeptide, protein-glutamine-gamma-glutamyltransferase)                        | -         | -         | -  |
| -4.4 | -            | AI042017  | 223405_at   | N-acetylneuraminase pyruvate lyase (dihydrodipicolinate synthase)                                      |           |           |    |
| -4.4 | -            | AI340270  | 227932_at   | Ariadne homolog 2 (Drosophila)                                                                         |           |           |    |
| -4.5 | -            | BF438417  | 225892_at   | Iron-responsive element binding protein 2                                                              |           |           |    |
| -4.5 | -            | AA495984  | 228410_at   | GRB2-associated binding protein 3                                                                      |           |           |    |
| -4.5 | LOC100129652 | AA670344  | 208622_s_at | Hypothetical protein LOC100129652                                                                      | Hs.714371 | 100129652 | 6  |
| -4.5 | PP1L1        | BC003048  | 222500_at   | Peptidylprolyl isomerase (cyclophilin)-like 1                                                          |           |           |    |
| -4.5 | BTG1         | NM_001731 | 200921_s_at | B-cell translocation gene 1, anti-proliferative                                                        | Hs.255935 | 694       | 12 |
| -4.5 | HIST1H1E     | AL353759  | 222067_x_at | histone cluster 1, H2bd                                                                                | -         | -         | -  |

**Down-Regulated Transcripts (U133A 133B)**

|      |          |           |             |                                                                                                                                                                    |           |           |    |
|------|----------|-----------|-------------|--------------------------------------------------------------------------------------------------------------------------------------------------------------------|-----------|-----------|----|
| -4.5 | PSTPIP1  | AF038602  | 211178_s_at | Proline-serine-threonine phosphatase interacting protein 1                                                                                                         | Hs.129758 | 9051      | 15 |
| -4.5 | -        | AW022607  | 226806_s_at | Nuclear factor I/A                                                                                                                                                 |           |           |    |
| -4.5 | -        | BE503286  | 225302_at   | Thioredoxin-related transmembrane protein 3                                                                                                                        |           |           |    |
| -4.6 | LGALS12  | AF222694  | 223828_s_at | Lectin, galactoside-binding, soluble, 12                                                                                                                           |           |           |    |
| -4.6 | IAM2     | NM_021219 | 219213_at   | Junctional adhesion molecule 2                                                                                                                                     | Hs.517227 | 58494     | 21 |
| -4.6 | RHOH     | NM_004310 | 204951_at   | Ras homolog gene family, member H                                                                                                                                  | Hs.654594 | 399       | 4  |
| -4.6 | COQ5     | BC004916  | 223114_at   | Coenzyme Q5 homolog, methyltransferase ( <i>S. cerevisiae</i> )                                                                                                    |           |           |    |
| -4.6 | -        | AA747303  | 227916_x_at | Exosome component 3                                                                                                                                                |           |           |    |
| -4.6 | -        | AV703462  | 224880_at   | Transcribed locus                                                                                                                                                  |           |           |    |
| -4.6 | -        | AV698647  | 215379_x_at | Immunoglobulin lambda locus                                                                                                                                        | Hs.449585 | 3535      | 22 |
| -4.6 | -        | AI081246  | 228869_at   | Transcribed locus                                                                                                                                                  |           |           |    |
| -4.7 | -        | T90295    | 226661_at   | Cell division cycle associated 2                                                                                                                                   |           |           |    |
| -4.7 | -        | AV699857  | 225039_at   | Ribulose-5-phosphate-3-epimerase                                                                                                                                   |           |           |    |
| -4.7 | -        | AL390857  | 216820_at   | Human DNA sequence from clone RP11-51N22 on chromosome 13 Contains ESTs, STSs and GSSs. Contains an HNRPA1 (heterogeneous nuclear ribonucleoprotein A1) pseudogene |           |           |    |
| -4.7 | CD97     | NM_001784 | 202910_s_at | Leucocyte antigen CD97                                                                                                                                             | Hs.466039 | 100130656 | 19 |
| -4.7 | DCUN1D5  | BC004169  | 223151_at   | DCN1, defective in cullin neddylation 1, domain containing 5 ( <i>S. cerevisiae</i> )                                                                              |           |           |    |
| -4.7 | -        | N73682    | 226128_at   | Consensus includes gb:N73682 /FEA=EST /DB_XREF=gi:1230967 /DB_XREF=est:yz79b06.s1 /CLONE=IMAGE:289235 /UG=Hs.6236 Homo sapiens cDNA: FLJ21487 fis, clone COL05419  |           |           |    |
| -4.8 | -        | AI520949  | 225418_at   | Poliovirus receptor-related 2 (herpesvirus entry mediator B)                                                                                                       |           |           |    |
| -4.8 | IL8      | NM_000584 | 202859_x_at | Interleukin 8                                                                                                                                                      | Hs.624    | 3576      | 4  |
| -4.8 | ARL4A    | NM_005738 | 205020_s_at | ADP-ribosylation factor-like 4A                                                                                                                                    | Hs.245540 | 10124     | 7  |
| -4.8 | PER1     | AF022991  | 36829_at    | Period homolog 1 ( <i>Drosophila</i> )                                                                                                                             | Hs.445534 | 5187      | 17 |
| -4.8 | EPHB4    | NM_004444 | 202894_at   | EPH receptor B4                                                                                                                                                    | Hs.437008 | 2050      | 7  |
| -4.8 | -        | AI469788  | 235572_at   | SPC24, NDC80 kinetochore complex component, homolog ( <i>S. cerevisiae</i> )                                                                                       |           |           |    |
| -4.8 | CKLF     | AF096895  | 223451_s_at | Chemokine-like factor                                                                                                                                              |           |           |    |
| -4.8 | -        | BG259856  | 226628_at   | THO complex 2                                                                                                                                                      |           |           |    |
| -4.8 | -        | BG339450  | 225402_at   | TP53 regulating kinase                                                                                                                                             |           |           |    |
| -4.9 | RARS2    | AK023550  | 225264_at   | Arginyl-tRNA synthetase 2, mitochondrial                                                                                                                           |           |           |    |
| -4.9 | -        | AI633734  | 228334_x_at | KIAA1712                                                                                                                                                           |           |           |    |
| -4.9 | -        | NM_014120 | 206962_x_at | Homo sapiens PRO0214 protein (PRO0214), mRNA.                                                                                                                      |           |           |    |
| -5.0 | -        | AW043782  | 234985_at   | Transcribed locus                                                                                                                                                  |           |           |    |
| -5.0 | TRIM59   | N90779    | 227801_at   | Tripartite motif-containing 59                                                                                                                                     |           |           |    |
| -5.0 | NFKBIA   | AI078167  | 201502_s_at | Nuclear factor of kappa light polypeptide gene enhancer in B-cells inhibitor, alpha                                                                                | Hs.81328  | 4792      | 14 |
| -5.0 | KLF9     | AI690205  | 203542_s_at | Kruppel-like factor 9                                                                                                                                              | Hs.150557 | 687       | 9  |
| -5.0 | -        | AW612657  | 226851_at   | Lysophospholipase-like 1                                                                                                                                           |           |           |    |
| -5.0 | FTSJD1   | AK023183  | 222811_at   | FtsJ methyltransferase domain containing 1                                                                                                                         |           |           |    |
| -5.0 | -        | BF970340  | 238010_at   | Chromosome 1 open reading frame 174                                                                                                                                |           |           |    |
| -5.0 | -        | AA722799  | 224911_s_at | Discoidin, CUB and LCCL domain containing 2                                                                                                                        |           |           |    |
| -5.0 | ADAM33   | AL117415  | 233868_x_at | ADAM metalloproteinase domain 33                                                                                                                                   |           |           |    |
| -5.0 | -        | AI678096  | 225890_at   | Chromosome 20 open reading frame 72                                                                                                                                |           |           |    |
| -5.1 | -        | AI458208  | 238389_s_at | Transcribed locus                                                                                                                                                  |           |           |    |
| -5.1 | -        | AI679555  | 243395_at   | Transcribed locus                                                                                                                                                  |           |           |    |
| -5.1 | TSPAN32  | AF176071  | 233467_s_at | Tetraspanin 32                                                                                                                                                     |           |           |    |
| -5.1 | LTBP3    | NM_021070 | 219922_s_at | Latent transforming growth factor beta binding protein 3                                                                                                           | Hs.289019 | 4054      | 11 |
| -5.1 | RASSF5   | BC004270  | 223322_at   | Ras association (RalGDS/AF-6) domain family member 5                                                                                                               |           |           |    |
| -5.1 | -        | AW504569  | 237753_at   | Transcribed locus                                                                                                                                                  |           |           |    |
| -5.1 | -        | NM_025120 | 220728_at   | Homo sapiens hypothetical protein FLJ13480 (FLJ13480), mRNA.                                                                                                       |           |           |    |
| -5.1 | -        | BG168139  | 235389_at   | PHD finger protein 20                                                                                                                                              |           |           |    |
| -5.1 | -        | AL589591  | 225497_at   | Transcribed locus                                                                                                                                                  |           |           |    |
| -5.1 | -        | BE552215  | 222754_at   | tRNA nucleotidyl transferase, CCA-adding, 1                                                                                                                        |           |           |    |
| -5.2 | -        | AI638155  | 239122_at   | Transcribed locus                                                                                                                                                  |           |           |    |
| -5.2 | ELP6     | BC000623  | 223277_at   | Chromosome 3 open reading frame 75                                                                                                                                 |           |           |    |
| -5.2 | -        | AI479923  | 231056_at   | Transcribed locus, moderately similar to NP_660275.2 ATP binding domain 3 [Homo sapiens]                                                                           |           |           |    |
| -5.2 | PCDH9    | AI524125  | 219737_s_at | Protocadherin 9                                                                                                                                                    | Hs.654709 | 5101      | 13 |
| -5.2 | SPNS1    | AF212371  | 223173_at   | Spinster homolog 1 ( <i>Drosophila</i> )                                                                                                                           |           |           |    |
| -5.2 | -        | AL577977  | 225837_at   | chromosome 12 open reading frame 32                                                                                                                                |           |           |    |
| -5.2 | SMAD3    | NM_005902 | 205398_s_at | SMAD family member 3                                                                                                                                               | Hs.714621 | 4088      | 15 |
| -5.2 | OTUD5    | AK026260  | 224745_x_at | OTU domain containing 5                                                                                                                                            |           |           |    |
| -5.2 | -        | AW473802  | 224934_at   | Yip1 domain family, member 5                                                                                                                                       |           |           |    |
| -5.2 | -        | N31982    | 226159_at   | Chromosome 5 open reading frame 51                                                                                                                                 |           |           |    |
| -5.2 | FGFR1OP2 | AL117545  | 233898_s_at | FGFR1 oncogene partner 2                                                                                                                                           |           |           |    |

**Down-Regulated Transcripts (U133A 133B)**

|      |           |           |             |                                                                                                                                                                                     |           |       |    |
|------|-----------|-----------|-------------|-------------------------------------------------------------------------------------------------------------------------------------------------------------------------------------|-----------|-------|----|
| -5.2 | OXT       | NM_000915 | 207576_x_at | Oxytocin, prepropeptide                                                                                                                                                             | Hs.113216 | 5020  | 20 |
| -5.2 | VIM       | AI922599  | 201426_s_at | Vimentin                                                                                                                                                                            | Hs.628678 | 7431  | 10 |
| -5.2 | GATAD2A   | AK024670  | 222526_at   | GATA zinc finger domain containing 2A                                                                                                                                               |           |       |    |
| -5.2 | RHOB      | AI263909  | 212099_at   | Ras homolog gene family, member B                                                                                                                                                   | Hs.502876 | 388   | 2  |
| -5.2 | C16orf67  | NM_024048 | 219442_at   | chromosome 16 open reading frame 67                                                                                                                                                 | -         | 79014 |    |
| -5.3 | AHNAK     | BG287862  | 211986_at   | AHNAK nucleoprotein                                                                                                                                                                 | Hs.502756 | 79026 | 11 |
| -5.3 | ZC3H12A   | NM_025079 | 218810_at   | Zinc finger CCHC-type containing 12A                                                                                                                                                | Hs.656294 | 80149 | 1  |
| -5.3 | -         | BG292405  | 224899_s_at | Magnesium transporter 1                                                                                                                                                             |           |       |    |
| -5.3 | -         | BE672260  | 225612_s_at | UDP-GlcNAc:betaGal beta-1,3-N-acetylglucosaminyltransferase 5                                                                                                                       |           |       |    |
| -5.3 | -         | BF446961  | 226178_at   | Transcribed locus                                                                                                                                                                   |           |       |    |
| -5.3 | HIST1H2BM | NM_003521 | 208515_at   | Histone cluster 1, H2bm                                                                                                                                                             | Hs.182432 | 8342  | 6  |
| -5.3 | POLR3GL   | BC004355  | 223269_at   | Polymerase (RNA) III (DNA directed) polypeptide G (32kD)-like                                                                                                                       |           |       |    |
| -5.3 | -         | BE218028  | 222488_s_at | Dynactin 4 (p62)                                                                                                                                                                    |           |       |    |
| -5.4 | -         | AI889373  | 227414_at   | Rhomboid domain containing 1                                                                                                                                                        |           |       |    |
| -5.4 | -         | AA630626  | 234986_at   | Transcribed locus                                                                                                                                                                   |           |       |    |
| -5.4 | -         | AI025829  | 235227_at   | Consensus includes gb:AI025829 /FEA=EST /DB_XREF=gi:3241442 /DB_XREF=est:ow12a02.s1 /CLONE=IMAGE:1646570 /UG=Hs.86320 ESTs                                                          |           |       |    |
| -5.4 | -         | AW118175  | 227622_at   | PCF11, cleavage and polyadenylation factor subunit, homolog (S. cerevisiae)                                                                                                         |           |       |    |
| -5.4 | -         | AI762915  | 225214_at   | Hypothetical protein LOC100129034                                                                                                                                                   |           |       |    |
| -5.4 | -         | BF508705  | 225124_at   | Protein phosphatase 1, regulatory (inhibitor) subunit 9B                                                                                                                            |           |       |    |
| -5.4 | -         | AI091372  | 225557_at   | Cysteine-serine-rich nuclear protein 1                                                                                                                                              |           |       |    |
| -5.4 | SLC17A5   | AK026921  | 223441_at   | Solute carrier family 17 (anion/sugar transporter), member 5                                                                                                                        |           |       |    |
| -5.4 | PNRC1     | AF279899  | 209034_at   | Proline-rich nuclear receptor coactivator 1                                                                                                                                         | Hs.75969  | 10957 | 6  |
| -5.4 | -         | BF732480  | 225974_at   | Transmembrane protein 64                                                                                                                                                            |           |       |    |
| -5.5 | -         | AF161371  | 225788_at   | Chromosome 6 open reading frame 153                                                                                                                                                 |           |       |    |
| -5.5 | FAM120C   | NM_017848 | 220685_at   | Family with sequence similarity 120C                                                                                                                                                | Hs.86045  | 54954 | X  |
| -5.5 | AHRR      | AB033060  | 229354_at   | Programmed cell death 6                                                                                                                                                             |           |       |    |
| -5.5 | CLEC2B    | BC005254  | 209732_at   | C-type lectin domain family 2, member B                                                                                                                                             | Hs.85201  | 9976  | 12 |
| -5.6 | -         | BF033615  | 235346_at   | FUN14 domain containing 1                                                                                                                                                           |           |       |    |
| -5.6 | SLC22A23  | AL512737  | 223194_s_at | Solute carrier family 22, member 23                                                                                                                                                 |           |       |    |
| -5.6 | -         | BE962679  | 222415_at   | Myeloid/lymphoid or mixed-lineage leukemia 3                                                                                                                                        |           |       |    |
| -5.6 | -         | AA626884  | 224708_at   | KIAA2013                                                                                                                                                                            |           |       |    |
| -5.6 | -         | AA524700  | 225232_at   | Myotubularin related protein 12                                                                                                                                                     |           |       |    |
| -5.6 | -         | AA604382  | 226338_at   | Transmembrane protein 55A                                                                                                                                                           |           |       |    |
| -5.6 | STK32B    | NM_018401 | 219686_at   | Serine/threonine kinase 32B                                                                                                                                                         | Hs.133062 | 55351 | 4  |
| -5.6 | HOXA5     | NM_019102 | 213844_at   | Homeobox A5                                                                                                                                                                         | Hs.655218 | 3202  | 7  |
| -5.6 | -         | BF591556  | 228487_s_at | Transcribed locus                                                                                                                                                                   |           |       |    |
| -5.6 | -         | AI079540  | 226437_at   | Yip1 interacting factor homolog B (S. cerevisiae)                                                                                                                                   |           |       |    |
| -5.6 | -         | AI934828  | 227116_at   | Transcribed locus                                                                                                                                                                   |           |       |    |
| -5.7 | -         | AI769745  | 226648_at   | Hypoxia inducible factor 1, alpha subunit inhibitor                                                                                                                                 |           |       |    |
| -5.7 | -         | BF569593  | 225201_s_at | Mitochondrial ribosomal protein L14                                                                                                                                                 |           |       |    |
| -5.7 | -         | W60810    | 223282_at   | Teashirt zinc finger homeobox 1                                                                                                                                                     |           |       |    |
| -5.7 | -         | AW138815  | 227959_at   | Transcribed locus                                                                                                                                                                   |           |       |    |
| -5.7 | GUK1      | BC006249  | 200075_s_at | Guanylate kinase 1                                                                                                                                                                  |           |       |    |
| -5.7 | -         | AW576871  | 217577_at   | Transcribed locus                                                                                                                                                                   | Hs.670136 | -     | 2  |
| -5.7 | -         | AA416756  | 244677_at   | Transcribed locus                                                                                                                                                                   |           |       |    |
| -5.7 | -         | AA554833  | 226084_at   | Microtubule-associated protein 1B                                                                                                                                                   |           |       |    |
| -5.7 | -         | AW966474  | 227182_at   | Sushi domain containing 3                                                                                                                                                           |           |       |    |
| -5.8 | -         | AA954994  | 238021_s_at | HCG1815491                                                                                                                                                                          |           |       |    |
| -5.8 | -         | AL559283  | 224684_at   | Sorting nexin 12                                                                                                                                                                    |           |       |    |
| -5.8 | TSPYL2    | NM_022117 | 218012_at   | TSPY-like 2                                                                                                                                                                         | Hs.136164 | 64061 | X  |
| -5.8 | -         | AK027035  | 224750_at   | Ring finger protein 185                                                                                                                                                             |           |       |    |
| -5.9 | -         | AW006067  | 235142_at   | Zinc finger and BTB domain containing 8A                                                                                                                                            |           |       |    |
| -5.9 | -         | AU157541  | 222872_x_at | Transcribed locus                                                                                                                                                                   |           |       |    |
| -5.9 | -         | AA936745  | 225537_at   | Trafficking protein particle complex 6B                                                                                                                                             |           |       |    |
| -5.9 | CCM2      | BC004903  | 223164_at   | Cerebral cavernous malformation 2                                                                                                                                                   |           |       |    |
| -5.9 | -         | AW572609  | 226860_at   | Transmembrane protein 19                                                                                                                                                            |           |       |    |
| -5.9 | -         | AA526970  | 225199_at   | Consensus includes gb:AA526970 /FEA=EST /DB_XREF=gi:2269039 /DB_XREF=est:ni06c09.s1 /CLONE=IMAGE:967216 /UG=Hs.12396 ESTs, Weakly similar to 2004399A chromosomal protein H.sapiens |           |       |    |
| -5.9 | -         | BE504653  | 226503_at   | RAP1 interacting factor homolog (yeast)                                                                                                                                             |           |       |    |
| -5.9 | PLK3      | NM_004073 | 204958_at   | Polo-like kinase 3 (Drosophila)                                                                                                                                                     | Hs.632415 | 1263  | 1  |
| -5.9 | -         | BF515132  | 227002_at   | Family with sequence similarity 78, member A                                                                                                                                        |           |       |    |
| -5.9 | TNFAIP8L2 | AF271774  | 223583_at   | Tumor necrosis factor, alpha-induced protein 8-like 2                                                                                                                               |           |       |    |
| -5.9 | -         | BF247054  | 225274_at   | Prenylcysteine oxidase 1                                                                                                                                                            |           |       |    |

**Down-Regulated Transcripts (U133A 133B)**

|      |           |           |             |                                                                                   |           |       |   |    |
|------|-----------|-----------|-------------|-----------------------------------------------------------------------------------|-----------|-------|---|----|
| -5.9 | -         | AI763287  | 225352_at   | SEC62 homolog ( <i>S. cerevisiae</i> )                                            |           |       |   |    |
| -5.9 | -         | AL562950  | 223024_at   | Adaptor-related protein complex 1, mu 1 subunit                                   |           |       |   |    |
| -6.0 | -         | AA994178  | 225947_at   | Myosin XIX                                                                        |           |       |   |    |
| -6.0 | -         | BF507862  | 227385_at   | Phosphatidic acid phosphatase type 2 domain containing 2                          |           |       |   |    |
| -6.0 | -         | BE503186  | 226146_at   | CDNA clone IMAGE:5294560                                                          |           |       |   |    |
| -6.0 | -         | AI683621  | 231181_at   | Transcribed locus                                                                 |           |       |   |    |
| -6.0 | -         | AW511595  | 228336_at   | PWWP domain containing 2A                                                         |           |       |   |    |
| -6.0 | -         | AI635756  | 232370_at   | hypothetical protein LOC254057                                                    |           |       |   |    |
| -6.0 | ANKFY1    | AK025960  | 224900_at   | Ankyrin repeat and FYVE domain containing 1                                       |           |       |   |    |
| -6.1 | COG6      | AF116827  | 225769_at   | Component of oligomeric golgi complex 6                                           |           |       |   |    |
| -6.1 | FOSL1     | BG251266  | 204420_at   | FOS-like antigen 1                                                                | Hs.283565 | 8061  |   | 11 |
| -6.1 | -         | AL138875  | 233647_s_at | cytidine and dCMP deaminase domain containing 1                                   |           |       |   |    |
| -6.1 | -         | AI208857  | 239238_at   | Transcribed locus                                                                 |           |       |   |    |
| -6.1 | ARRDC2    | AK000689  | 226055_at   | Arrestin domain containing 2                                                      |           |       |   |    |
| -6.1 | -         | AU146532  | 226452_at   | Pyruvate dehydrogenase kinase, isozyme 1                                          |           |       |   |    |
| -6.1 | CISH      | D83532    | 223961_s_at | Cytokine inducible SH2-containing protein                                         |           |       |   |    |
| -6.2 | LAG3      | NM_002286 | 206486_at   | Lymphocyte-activation gene 3                                                      | Hs.409523 | 3902  |   | 12 |
| -6.2 | FOXO1     | AW117498  | 202723_s_at | Forkhead box O1                                                                   | Hs.370666 | 2308  |   | 13 |
| -6.2 | -         | AW138757  | 226160_at   | Hexose-6-phosphate dehydrogenase (glucose 1-dehydrogenase)                        |           |       |   |    |
| -6.2 | -         | AW135012  | 229344_x_at | Ribosomal modification protein rimK-like family member B                          |           |       |   |    |
| -6.2 | BCR       | AA845710  | 214623_at   | Breakpoint cluster region                                                         | Hs.517461 | 613   |   | 22 |
| -6.2 | -         | AL565381  | 227307_at   | Transcribed locus                                                                 |           |       |   |    |
| -6.3 | -         | AI638714  | 225371_at   | GLE1 RNA export mediator homolog (yeast)                                          |           |       |   |    |
| -6.3 | -         | AV706522  | 235061_at   | protein phosphatase 1K (PP2C domain containing)                                   |           |       |   |    |
| -6.4 | -         | N95414    | 227314_at   | Integrin, alpha 2 (CD49B, alpha 2 subunit of VLA-2 receptor)                      |           |       |   |    |
| -6.4 | -         | AU152162  | 227979_at   | Full length insert cDNA clone YX44E03                                             |           |       |   |    |
| -6.4 | -         | AF095723  | 216943_at   | Homo sapiens GABA-B receptor splice variant 1 mRNA, partial cds.                  | -         | -     | - | -  |
| -6.4 | -         | AA954994  | 238022_at   | HCG1815491                                                                        |           |       |   |    |
| -6.4 | -         | BF753047  | 244726_at   | Transcribed locus                                                                 |           |       |   |    |
| -6.4 | -         | AL138431  | 239035_at   | 5,10-methylenetetrahydrofolate reductase (NADPH)                                  |           |       |   |    |
| -6.5 | TMEM164   | BC002716  | 223202_s_at | Transmembrane protein 164                                                         |           |       |   |    |
| -6.5 | -         | AA151838  | 226170_at   | Eyes absent homolog 3 ( <i>Drosophila</i> )                                       |           |       |   |    |
| -6.5 | NAMPT     | NM_005746 | 217739_s_at | Nicotinamide phosphoribosyltransferase                                            | Hs.489615 | 10135 |   | 7  |
| -6.5 | -         | AA526907  | 225356_at   | Transcribed locus                                                                 |           |       |   |    |
| -6.5 | TM2D2     | AF353991  | 224413_s_at | TM2 domain containing 2                                                           |           |       |   |    |
| -6.5 | SIAE      | AF303378  | 224391_s_at | Sialic acid acetyltransferase                                                     |           |       |   |    |
| -6.6 | -         | BF115203  | 226092_at   | Membrane protein, palmitoylated 5 (MAGUK p55 subfamily member 5)                  |           |       |   |    |
| -6.6 | -         | BC001294  | 223401_at   | chromosome 17 open reading frame 48                                               |           |       |   |    |
| -6.6 | RAB11FIP1 | NM_025151 | 219681_s_at | RAB11 family interacting protein 1 (class I)                                      | Hs.696035 | 80223 |   | 8  |
| -6.6 | -         | AI366784  | 235020_at   | TAF4b RNA polymerase II, TATA box binding protein (TBP)-associated factor, 105kDa |           |       |   |    |
| -6.6 | TET2      | AB046766  | 227624_at   | Tet oncogene family member 2                                                      |           |       |   |    |
| -6.6 | -         | W63776    | 229862_x_at | Zinc finger and BTB domain containing 45                                          |           |       |   |    |
| -6.7 | -         | AI684591  | 231106_at   | Transcribed locus                                                                 |           |       |   |    |
| -6.7 | -         | AW977401  | 223288_at   | Ubiquitin specific peptidase 38                                                   |           |       |   |    |
| -6.7 | ECHDC1    | BC003549  | 223088_x_at | Enoyl Coenzyme A hydratase domain containing 1                                    |           |       |   |    |
| -6.7 | -         | AU151331  | 227569_at   | Ligand of numb-protein X 2                                                        |           |       |   |    |
| -6.7 | -         | N92500    | 229905_at   | Transcribed locus                                                                 |           |       |   |    |
| -6.7 | -         | AL572206  | 224957_at   | Chromosome 18 open reading frame 32                                               |           |       |   |    |
| -6.7 | -         | AI655611  | 226869_at   | multiple EGF-like-domains 6                                                       |           |       |   |    |
| -6.7 | -         | BF939473  | 229295_at   | Hypothetical protein LOC150166                                                    |           |       |   |    |
| -6.8 | -         | AW665656  | 242281_at   | Transcribed locus                                                                 |           |       |   |    |
| -6.8 | -         | AV717041  | 226996_at   | Lysocardiolipin acyltransferase 1                                                 |           |       |   |    |
| -6.8 | -         | AA886888  | 227728_at   | Protein phosphatase 1A (formerly 2C), magnesium-dependent, alpha isoform          |           |       |   |    |
| -6.8 | -         | BF724558  | 241722_x_at | Transcribed locus                                                                 |           |       |   |    |
| -6.8 | LACTB2    | BC000878  | 222714_s_at | Lactamase, beta 2                                                                 |           |       |   |    |
| -6.9 | ANLN      | AK023208  | 222608_s_at | Anillin, actin binding protein                                                    |           |       |   |    |
| -6.9 | KLF13     | AL390127  | 225390_s_at | Kruppel-like factor 13                                                            |           |       |   |    |
| -6.9 | -         | AW203959  | 230944_at   | Transcribed locus                                                                 |           |       |   |    |
| -6.9 | -         | BE327172  | 213281_at   | Jun oncogene                                                                      | -         | -     | - | -  |
| -6.9 | -         | AI935657  | 224945_at   | BTB (POZ) domain containing 7                                                     |           |       |   |    |
| -7.0 | JUND      | AI762296  | 203751_x_at | Jun D proto-oncogene                                                              | Hs.2780   | 3727  |   | 19 |
| -7.0 | -         | AW575350  | 225208_s_at | Family with sequence similarity 103, member A1                                    |           |       |   |    |
| -7.0 | COL6A2    | AY029208  | 209156_s_at | Collagen, type VI, alpha 2                                                        | Hs.420269 | 1292  |   | 21 |
| -7.0 | PELI1     | NM_020651 | 218319_at   | Pellino homolog 1 ( <i>Drosophila</i> )                                           | Hs.7886   | 57162 |   | 2  |

### Down-Regulated Transcripts (U133A 133B)

|      |          |           |             |                                                                                                        |           |       |  |    |
|------|----------|-----------|-------------|--------------------------------------------------------------------------------------------------------|-----------|-------|--|----|
| -7.0 | -        | AU153746  | 222569_at   | UDP-glucose ceramide glucosyltransferase-like 1                                                        |           |       |  |    |
| -7.0 | -        | BF219240  | 225945_at   | Zinc finger protein 655                                                                                |           |       |  |    |
| -7.1 | B3GNT2   | AF288208  | 222870_s_at | UDP-GlcNAc:betaGal beta-1,3-N-acetylglucosaminyltransferase 2                                          |           |       |  |    |
| -7.1 | -        | BF439595  | 226180_at   | WD repeat domain 36                                                                                    |           |       |  |    |
| -7.1 | -        | BE856541  | 227133_at   | Chromosome X open reading frame 39                                                                     |           |       |  |    |
| -7.1 | -        | BF680438  | 226038_at   | Transcribed locus                                                                                      |           |       |  |    |
| -7.1 | LOC87420 | AK026764  | 226348_at   | Homo sapiens cDNA: FLJ23111 fis, clone LNG07835.                                                       |           |       |  |    |
| -7.1 | TMEM33   | BC000948  | 222642_s_at | Transmembrane protein 33                                                                               |           |       |  |    |
| -7.1 | -        | AI742810  | 222323_at   | Transcribed locus, moderately similar to XP_582033.1 PREDICTED: crystallin, gamma E [Bos taurus]       | Hs.131057 | -     |  | 2  |
| -7.1 | -        | BF476076  | 227121_at   | MRNA; cDNA DKFp586K1922 (from clone DKFp586K1922)                                                      |           |       |  |    |
| -7.1 | MTRFR1L  | ALS12766  | 224280_s_at | Family with sequence similarity 54, member B                                                           |           |       |  |    |
| -7.2 | -        | AK023950  | 222467_s_at | SAPS domain family, member 3                                                                           |           |       |  |    |
| -7.2 | -        | AW471145  | 226279_at   | Protease, serine, 23                                                                                   |           |       |  |    |
| -7.2 | IGHG1    | AI858004  | 213674_x_at | Immunoglobulin heavy constant gamma 1 (G1m marker)                                                     | Hs.510635 | 3500  |  | 14 |
| -7.2 | -        | ALS75306  | 224997_x_at | H19, imprinted maternally expressed transcript (non-protein coding)                                    |           |       |  |    |
| -7.2 | DUSP2    | NM_004418 | 204794_at   | Dual specificity phosphatase 2                                                                         | Hs.1183   | 1844  |  | 2  |
| -7.2 | ZC3HC1   | BC000190  | 223163_s_at | Zinc finger, C3HC-type containing 1                                                                    |           |       |  |    |
| -7.2 | -        | T90642    | 230291_s_at | Transcribed locus                                                                                      |           |       |  |    |
| -7.2 | COX4I1   | AW337510  | 213758_at   | Cytochrome c oxidase subunit IV isoform 1                                                              | Hs.433419 | 1327  |  | 16 |
| -7.2 | -        | AI741469  | 234970_at   | Tandem C2 domains, nuclear                                                                             |           |       |  |    |
| -7.2 | -        | AA621580  | 222489_s_at | Werner helicase interacting protein 1                                                                  |           |       |  |    |
| -7.3 | -        | AU154401  | 225741_at   | THUMP domain containing 3                                                                              |           |       |  |    |
| -7.4 | -        | AV712694  | 227637_at   | Transcription factor CP2                                                                               |           |       |  |    |
| -7.4 | -        | AW270138  | 226909_at   | Zinc finger protein 518B                                                                               |           |       |  |    |
| -7.4 | -        | AW575754  | 226459_at   | Phosphoinositide-3-kinase adaptor protein 1                                                            |           |       |  |    |
| -7.5 | -        | AI268231  | 229574_at   | Transcribed locus                                                                                      |           |       |  |    |
| -7.5 | FAM220A  | BC006110  | 224452_s_at | Hypothetical protein LOC84792                                                                          |           |       |  |    |
| -7.5 | -        | BF111780  | 225400_at   | TRNA splicing endonuclease 15 homolog (S. cerevisiae)                                                  |           |       |  |    |
| -7.5 | CYLD     | AK024212  | 222142_at   | Cylindromatosis (turban tumor syndrome)                                                                | Hs.578973 | 1540  |  | 16 |
| -7.6 | -        | AI279536  | 230734_x_at | ELISC-1                                                                                                |           |       |  |    |
| -7.6 | -        | AW664953  | 227335_at   | Death inducer-oblierator 1                                                                             |           |       |  |    |
| -7.6 | -        | AA579630  | 225320_at   | Coiled-coil domain containing 109A                                                                     |           |       |  |    |
| -7.6 | -        | N62126    | 235721_at   | Deltex homolog 3 (Drosophila)                                                                          |           |       |  |    |
| -7.6 | -        | AW183080  | 230252_at   | lysophosphatidic acid receptor 5                                                                       |           |       |  |    |
| -7.7 | -        | AK021962  | 233214_at   | CDNA FLJ11900 fis, clone HEMBA1007341                                                                  |           |       |  |    |
| -7.7 | -        | AV726956  | 229963_at   | Brain expressed, X-linked 5                                                                            |           |       |  |    |
| -7.7 | -        | BE326710  | 229778_at   | Chromosome 12 open reading frame 39                                                                    |           |       |  |    |
| -7.7 | -        | AW294894  | 226265_at   | Glutamine and serine rich 1                                                                            |           |       |  |    |
| -7.7 | -        | R38084    | 225558_at   | G protein-coupled receptor kinase interacting ArfGAP 2                                                 |           |       |  |    |
| -7.7 | -        | AW025216  | 225210_s_at | Transcribed locus, moderately similar to XP_001714790.1 PREDICTED: hypothetical protein [Homo sapiens] |           |       |  |    |
| -7.7 | -        | AW205632  | 238156_at   | Transcribed locus                                                                                      |           |       |  |    |
| -7.7 | -        | AI457965  | 225256_at   | Transcribed locus                                                                                      |           |       |  |    |
| -7.8 | DUSP1    | NM_004417 | 201041_s_at | Dual specificity phosphatase 1                                                                         | Hs.171695 | 1843  |  | 5  |
| -7.8 | -        | AW183154  | 236641_at   | Kinesin family member 14                                                                               |           |       |  |    |
| -7.8 | TIPARP   | ALS56438  | 212665_at   | TCDD-inducible poly(ADP-ribose) polymerase                                                             | Hs.719169 | 25976 |  | 3  |
| -7.8 | -        | AV706396  | 226969_at   | 5-methyltetrahydrofolate-homocysteine methyltransferase                                                |           |       |  |    |
| -7.8 | -        | AF090887  | 215642_at   | Clone HQ0085                                                                                           | Hs.612030 | -     |  | 10 |
| -7.8 | NAV2-AS4 | AK023501  | 233077_at   | Hypothetical gene supported by AK023501                                                                |           |       |  |    |
| -7.9 | MED28    | AF358829  | 224416_s_at | Mediator complex subunit 28                                                                            |           |       |  |    |
| -7.9 | -        | AA633196  | 222476_at   | CCR4-NOT transcription complex, subunit 6                                                              |           |       |  |    |
| -7.9 | -        | N31731    | 230165_at   | Shugoshin-like 2 (S. pombe)                                                                            |           |       |  |    |
| -7.9 | -        | AI972599  | 230761_at   | Transcribed locus                                                                                      |           |       |  |    |
| -8.0 | -        | AI190755  | 228263_at   | GRP1 (general receptor for phosphoinositides 1)-associated scaffold protein                            |           |       |  |    |
| -8.0 | -        | AL529634  | 225470_at   | Nucleoporin 35kDa                                                                                      |           |       |  |    |
| -8.0 | -        | AL039384  | 225005_at   | Transcribed locus                                                                                      |           |       |  |    |
| -8.0 | -        | AV728521  | 224958_at   | Nuclear fragile X mental retardation protein interacting protein 2                                     |           |       |  |    |
| -8.0 | -        | ALS46529  | 235593_at   | Zinc finger E-box binding homeobox 2                                                                   |           |       |  |    |
| -8.0 | GPRC5B   | NM_016235 | 203632_s_at | G protein-coupled receptor, family C, group 5, member B                                                | Hs.148685 | 51704 |  | 16 |
| -8.1 | -        | AI992290  | 226896_at   | Coiled-coil-helix-coiled-coil-helix domain containing 1                                                |           |       |  |    |
| -8.1 | -        | AA588400  | 229396_at   | Ovo-like 1(Drosophila)                                                                                 |           |       |  |    |
| -8.1 | -        | AK025220  | 234942_s_at | Thyroid hormone receptor associated protein 3                                                          |           |       |  |    |
| -8.1 | VPS18    | AF308802  | 223346_at   | Vacuolar protein sorting 18 homolog (S. cerevisiae)                                                    |           |       |  |    |
| -8.1 | -        | AI866426  | 225378_at   | vacuolar protein sorting 37 homolog A (S. cerevisiae)                                                  |           |       |  |    |

**Down-Regulated Transcripts (U133A 133B)**

|      |          |           |             |                                                                                                         |           |       |    |
|------|----------|-----------|-------------|---------------------------------------------------------------------------------------------------------|-----------|-------|----|
| -8.1 | CARD6    | AF356193  | 224414_s_at | Caspase recruitment domain family, member 6                                                             |           |       |    |
| -8.1 | CCNL1    | NM_020307 | 220046_s_at | Cyclin L1                                                                                               | Hs.4859   | 57018 | 3  |
| -8.1 | CD38     | NM_001775 | 205692_s_at | CD38 molecule                                                                                           | Hs.479214 | 952   | 4  |
| -8.2 | -        | AI818048  | 225048_at   | PHD finger protein 10                                                                                   |           |       |    |
| -8.2 | MTRF1L   | AL049992  | 217204_at   | Mitochondrial translational release factor 1-like                                                       | Hs.225836 | 54516 | 6  |
| -8.2 | -        | BG179317  | 227111_at   | Zinc finger and BTB domain containing 34                                                                |           |       |    |
| -8.2 | -        | R11899    | 238879_at   | CDNA FLJ38454 fis, clone FEBRA2019690                                                                   |           |       |    |
| -8.2 | -        | BC004528  | 224298_s_at | UBA domain containing 2                                                                                 |           |       |    |
| -8.3 | -        | AW269340  | 226985_at   | FYVE, RhoGEF and PH domain containing 5                                                                 |           |       |    |
| -8.3 | -        | BE392119  | 243707_at   | Transcribed locus, strongly similar to XP_001140852.1 PREDICTED: hypothetical protein [Pan troglodytes] |           |       |    |
| -8.4 | -        | AW952781  | 235174_s_at | Transcribed locus                                                                                       |           |       |    |
| -8.4 | -        | AV734843  | 233085_s_at | Transcribed locus                                                                                       |           |       |    |
| -8.4 | PPP1R16B | AB020630  | 41577_at    | Protein phosphatase 1, regulatory (inhibitor) subunit 16B                                               | Hs.45719  | 26051 | 20 |
| -8.4 | -        | AI339426  | 228990_at   | Small nucleolar RNA host gene 12 (non-protein coding)                                                   |           |       |    |
| -8.4 | -        | AW274503  | 228396_at   | Transcribed locus                                                                                       |           |       |    |
| -8.4 | -        | AA044835  | 225872_at   | Solute carrier family 35, member F5                                                                     |           |       |    |
| -8.4 | RPS27L   | BC003667  | 222487_s_at | Ribosomal protein S27-like                                                                              |           |       |    |
| -8.5 | -        | AW439242  | 229640_x_at | CDNA FLJ26856 fis, clone PRS08123                                                                       |           |       |    |
| -8.5 | -        | AF172327  | 223964_x_at | Homo sapiens clone 709724 unknown mRNA, complete cds.                                                   |           |       |    |
| -8.6 | MS4A6A   | AB013104  | 223922_x_at | Membrane-spanning 4-domains, subfamily A, member 6A                                                     |           |       |    |
| -8.6 | -        | AI889093  | 226232_at   | Growth differentiation factor 11                                                                        |           |       |    |
| -8.6 | CCDC88C  | AB040942  | 227228_s_at | Coiled-coil domain containing 88C                                                                       |           |       |    |
| -8.6 | -        | AL563795  | 226199_at   | Uracil phosphoribosyltransferase (FUR1) homolog (S. cerevisiae)                                         |           |       |    |
| -8.7 | ASB4     | NM_016116 | 208481_at   | Ankyrin repeat and SOCS box-containing 4                                                                | Hs.666357 | 51666 | 7  |
| -8.7 | -        | AA889952  | 226277_at   | Collagen, type IV, alpha 3 (Goodpasture antigen) binding protein                                        |           |       |    |
| -8.7 | -        | BF977231  | 226868_at   | Glycosyltransferase 8 domain containing 3                                                               |           |       |    |
| -8.7 | -        | AA639752  | 225284_at   | DnaJ (Hsp40) homolog, subfamily C, member 3                                                             |           |       |    |
| -8.7 | -        | AL569506  | 228702_at   | Hypothetical LOC378805                                                                                  |           |       |    |
| -8.7 | DEPCD1B  | AK001166  | 226980_at   | DEP domain containing 1B                                                                                |           |       |    |
| -8.8 | -        | AL161622  | 234689_at   | chromosome 6 open reading frame 138                                                                     |           |       |    |
| -8.8 | -        | BF025955  | 223314_at   | Tetraspanin 14                                                                                          |           |       |    |
| -8.8 | -        | AW880875  | 242277_at   | Transcribed locus                                                                                       |           |       |    |
| -8.8 | -        | AI800998  | 230411_at   | CDNA FLJ41934 fis, clone PERIC2005111                                                                   |           |       |    |
| -8.8 | SPATA2   | U28164    | 204433_s_at | Spermatogenesis associated 2                                                                            | Hs.48513  | 9825  | 20 |
| -8.9 | -        | AI130705  | 226448_at   | Family with sequence similarity 89, member A                                                            |           |       |    |
| -8.9 | -        | AI017750  | 227166_at   | DnaJ (Hsp40) homolog, subfamily C, member 18                                                            |           |       |    |
| -8.9 | TMEM189  | AB044550  | 223186_at   | Ubiquitin-conjugating enzyme E2 variant 1                                                               |           |       |    |
| -8.9 | -        | AW572279  | 244428_at   | DNA (cytosine-5-)methyltransferase 3 alpha                                                              |           |       |    |
| -8.9 | -        | AW629014  | 227988_s_at | Vacuolar protein sorting 13 homolog A (S. cerevisiae)                                                   |           |       |    |
| -8.9 | EMCN     | AF205940  | 222885_at   | Endomucin                                                                                               |           |       |    |
| -8.9 | -        | AI927208  | 239273_s_at | Matrix metalloproteinase 28                                                                             |           |       |    |
| -9.0 | -        | BE748802  | 235526_at   | Chromosome 11 open reading frame 58                                                                     |           |       |    |
| -9.0 | -        | BE670797  | 230958_s_at | Transcribed locus                                                                                       |           |       |    |
| -9.0 | -        | BG029566  | 225154_at   | Synapse associated protein 1, SAP47 homolog (Drosophila)                                                |           |       |    |
| -9.0 | -        | BE858787  | 226384_at   | Phosphatidic acid phosphatase type 2 domain containing 1B                                               |           |       |    |
| -9.0 | -        | AW170591  | 228424_at   | N-acetylated alpha-linked acidic dipeptidase-like 1                                                     |           |       |    |
| -9.0 | RXRA     | BE675800  | 202426_s_at | Retinoid X receptor, alpha                                                                              | Hs.590886 | 6256  | 9  |
| -9.0 | -        | AI825998  | 226794_at   | Syntaxin binding protein 5 (tomosyn)                                                                    |           |       |    |
| -9.1 | -        | AA541716  | 226230_at   | Transcribed locus                                                                                       |           |       |    |
| -9.2 | -        | AA235663  | 244842_x_at | Transcribed locus                                                                                       |           |       |    |
| -9.2 | -        | T30183    | 226602_s_at | Breakpoint cluster region                                                                               |           |       |    |
| -9.2 | -        | AA074729  | 235096_at   | Leo1, Paf1/RNA polymerase II complex component, homolog (S. cerevisiae)                                 |           |       |    |
| -9.2 | -        | AL520984  | 225347_at   | ADP-ribosylation factor-like 8A                                                                         |           |       |    |
| -9.3 | -        | AI927692  | 228528_at   | CDNA FLJ41270 fis, clone BRAMY2036387                                                                   |           |       |    |
| -9.3 | -        | BG289314  | 232306_at   | Cadherin-like 26                                                                                        |           |       |    |
| -9.3 | -        | BF131248  | 225851_at   | Farnesyltransferase, CAAX box, beta                                                                     |           |       |    |
| -9.3 | CCDC82   | AF245436  | 223301_s_at | Coiled-coil domain containing 82                                                                        |           |       |    |
| -9.3 | -        | AL161979  | 232384_s_at | Clone IMAGE:111705 mRNA sequence                                                                        |           |       |    |
| -9.4 | -        | H87708    | 229100_s_at | Transcribed locus                                                                                       |           |       |    |
| -9.4 | NUDT22   | BC006129  | 224464_s_at | Nudix (nucleoside diphosphate linked moiety X)-type motif 22                                            |           |       |    |
| -9.4 | -        | BF671187  | 232349_x_at | IQ motif and WD repeats 1                                                                               |           |       |    |
| -9.4 | TBC1D14  | AB037743  | 224622_at   | TBC1 domain family, member 14                                                                           |           |       |    |
| -9.5 | -        | AW292751  | 225318_at   | CDNA: FLJ22049 fis, clone HEP09444                                                                      |           |       |    |
| -9.5 | -        | AI939336  | 240592_at   | Ligand dependent nuclear receptor corepressor-like                                                      |           |       |    |

### Down-Regulated Transcripts (U133A 133B)

|       |          |           |             |                                                                                                                                             |           |      |    |
|-------|----------|-----------|-------------|---------------------------------------------------------------------------------------------------------------------------------------------|-----------|------|----|
| -9.5  | -        | BF001267  | 225384_at   | Dedicator of cytokinesis 7                                                                                                                  |           |      |    |
| -9.5  | -        | AV707506  | 224876_at   | Transcribed locus                                                                                                                           |           |      |    |
| -9.5  | -        | BG433539  | 235164_at   | Zinc finger protein 25                                                                                                                      |           |      |    |
| -9.5  | -        | BE349614  | 226409_at   | TBC1 domain family, member 20                                                                                                               |           |      |    |
| -9.6  | -        | BF338045  | 227420_at   | Tumor necrosis factor, alpha-induced protein 8-like 1                                                                                       |           |      |    |
| -9.6  | -        | AA127686  | 225319_s_at | Component of oligomeric golgi complex 1                                                                                                     |           |      |    |
| -9.6  | CDH1     | NM_004360 | 201131_s_at | Cadherin 1, type 1, E-cadherin (epithelial)                                                                                                 | Hs.461086 | 999  | 16 |
| -9.7  | -        | AI139993  | 230099_at   | Transcribed locus                                                                                                                           |           |      |    |
| -9.7  | -        | AW073741  | 226518_at   | Potassium channel tetramerisation domain containing 10                                                                                      |           |      |    |
| -9.7  | -        | AI939422  | 241294_at   | Consensus includes gb:A1939422 /FEA=EST /DB_XREF=gi:5678385 /DB_XREF=est:qy97b05.x5 /CLONE=IMAGE:2019921 /UG=Hs.170332 ESTs                 |           |      |    |
| -9.7  | -        | BF514509  | 239050_s_at | Consensus includes gb:BF514509 /FEA=EST /DB_XREF=gi:11599688 /DB_XREF=est:UI-H-BW1-anf-g-03-0-UI.s1 /CLONE=IMAGE:3082180 /UG=Hs.262571 ESTs |           |      |    |
| -9.8  | -        | BG284709  | 222622_at   | Phosphoglycolate phosphatase                                                                                                                |           |      |    |
| -9.8  | -        | BF793454  | 226563_at   | SMAD family member 2                                                                                                                        |           |      |    |
| -9.8  | -        | AI188518  | 226686_at   | CDGSH iron sulfur domain 2                                                                                                                  |           |      |    |
| -9.9  | TSC22D3  | AL110191  | 208763_s_at | TSC22 domain family, member 3                                                                                                               | Hs.716410 | 1831 | X  |
| -9.9  | -        | W68737    | 239098_at   | Potassium channel regulator                                                                                                                 |           |      |    |
| -9.9  | -        | BG024886  | 224784_at   | Transcribed locus                                                                                                                           |           |      |    |
| -9.9  | -        | AI828221  | 226366_at   | SNF2 histone linker PHD RING helicase                                                                                                       |           |      |    |
| -9.9  | FAR1     | N63551    | 224865_at   | Fatty acyl CoA reductase 1                                                                                                                  |           |      |    |
| -10.0 | -        | BE622486  | 226562_at   | Zinc finger and SCAN domain containing 29                                                                                                   |           |      |    |
| -10.0 | ATL1     | AF131801  | 223340_at   | Atlastin GTPase 1                                                                                                                           |           |      |    |
| -10.0 | -        | AI857629  | 229507_at   | Chromosome 3 open reading frame 54                                                                                                          |           |      |    |
| -10.0 | C2orf29  | AK024221  | 224695_at   | Chromosome 2 open reading frame 29                                                                                                          |           |      |    |
| -10.0 | -        | AA722069  | 227657_at   | Ring finger protein 150                                                                                                                     |           |      |    |
| -10.1 | -        | AU146850  | 225732_at   | Transcribed locus                                                                                                                           |           |      |    |
| -10.1 | -        | AA056099  | 222566_at   | Transcribed locus                                                                                                                           |           |      |    |
| -10.1 | -        | AI056692  | 227278_at   | Transcribed locus                                                                                                                           |           |      |    |
| -10.2 | -        | AI870583  | 222780_s_at | Brain and acute leukemia, cytoplasmic                                                                                                       |           |      |    |
| -10.2 | -        | AI434790  | 239070_at   | Transcribed locus                                                                                                                           |           |      |    |
| -10.3 | -        | AI214996  | 226901_at   | Chromosome 17 open reading frame 58                                                                                                         |           |      |    |
| -10.3 | EREG     | NM_001432 | 205767_at   | Epiregulin                                                                                                                                  | Hs.115263 | 2069 | 4  |
| -10.3 | -        | AI738556  | 227345_at   | Tumor necrosis factor receptor superfamily, member 10d, decoy with truncated death domain                                                   |           |      |    |
| -10.3 | -        | BF514723  | 225910_at   | Helicase with zinc finger                                                                                                                   |           |      |    |
| -10.3 | -        | BF791801  | 226871_s_at | ATG4 autophagy related 4 homolog D (S. cerevisiae)                                                                                          |           |      |    |
| -10.4 | -        | R24779    | 235396_at   | Chromosome 22 open reading frame 25                                                                                                         |           |      |    |
| -10.4 | -        | AW294765  | 225734_at   | F-box protein 22                                                                                                                            |           |      |    |
| -10.5 | -        | AW340595  | 227383_at   | Hypothetical LOC728875                                                                                                                      |           |      |    |
| -10.5 | -        | AI674915  | 232130_at   | Transcribed locus                                                                                                                           |           |      |    |
| -10.5 | ATG16L2  | AK024423  | 225883_at   | ATG16 autophagy related 16-like 2 (S. cerevisiae)                                                                                           |           |      |    |
| -10.5 | -        | AW003459  | 226743_at   | Schlafen family member 11                                                                                                                   |           |      |    |
| -10.5 | -        | AA156022  | 226028_at   | Roundabout homolog 4, magic roundabout (Drosophila)                                                                                         |           |      |    |
| -10.5 | -        | BF577193  | 234982_at   | Transcribed locus                                                                                                                           |           |      |    |
| -10.5 | -        | AI991103  | 227877_at   | Chromosome 5 open reading frame 39                                                                                                          |           |      |    |
| -10.5 | -        | BF515755  | 236850_at   | Cell cycle associated protein 1                                                                                                             |           |      |    |
| -10.5 | -        | AI656807  | 228401_at   | ATPase family, AAA domain containing 2                                                                                                      |           |      |    |
| -10.5 | -        | AI708776  | 225456_at   | Mediator complex subunit 1                                                                                                                  |           |      |    |
| -10.5 | -        | N39230    | 229934_at   | Mir-223 transcript variant 1 mRNA, complete sequence                                                                                        |           |      |    |
| -10.6 | -        | AA191741  | 226756_at   | CDNA FLJ25556 fis, clone JTH02629                                                                                                           |           |      |    |
| -10.6 | -        | BE788266  | 238424_at   | Adenosine deaminase-like                                                                                                                    |           |      |    |
| -10.6 | -        | AW139915  | 233749_at   | Hypothetical protein LOC100129014                                                                                                           |           |      |    |
| -10.6 | -        | AA058578  | 226252_at   | CDNA FLJ34585 fis, clone KIDNE2008758                                                                                                       |           |      |    |
| -10.7 | NUF2     | AF326731  | 223381_at   | NUF2, NDC80 kinetochore complex component, homolog (S. cerevisiae)                                                                          |           |      |    |
| -10.7 | -        | AI638593  | 230021_at   | Chromosome 15 open reading frame 42                                                                                                         |           |      |    |
| -10.7 | GPR160   | BC000181  | 223423_at   | G protein-coupled receptor 160                                                                                                              |           |      |    |
| -10.8 | -        | AI393309  | 227008_at   | HD domain containing 3                                                                                                                      |           |      |    |
| -10.8 | -        | AI697160  | 230936_at   | DnaJ (Hsp40) related, subfamily B, member 13                                                                                                |           |      |    |
| -10.8 | -        | AI928513  | 227985_at   | Transcribed locus                                                                                                                           |           |      |    |
| -10.8 | KRTAP1-5 | AJ406928  | 233533_at   | Keratin associated protein 1-5                                                                                                              |           |      |    |
| -10.8 | -        | AI825302  | 238700_at   | Transcribed locus                                                                                                                           |           |      |    |
| -10.8 | COL5A1   | AI130969  | 203325_s_at | Collagen, type V, alpha 1                                                                                                                   | Hs.210283 | 1289 | 9  |
| -10.8 | -        | AL563613  | 226532_at   | Transcribed locus                                                                                                                           |           |      |    |
| -10.8 | AVIL     | AK022448  | 233333_x_at | Advillin                                                                                                                                    |           |      |    |

### Down-Regulated Transcripts (U133A 133B)

|       |          |           |             |                                                                                                                 |           |       |    |
|-------|----------|-----------|-------------|-----------------------------------------------------------------------------------------------------------------|-----------|-------|----|
| -10.8 | SETBP1   | NM_015559 | 205933_at   | SET binding protein 1                                                                                           | Hs.435458 | 26040 | 18 |
| -10.8 | -        | AW006952  | 228730_s_at | Secernin 2                                                                                                      |           |       |    |
| -10.8 | -        | BG401568  | 227506_at   | Solute carrier family 16, member 9 (monocarboxylic acid transporter 9)                                          |           |       |    |
| -10.8 | -        | AI807204  | 223197_s_at | SWI/SNF-related, matrix-associated actin-dependent regulator of chromatin, subfamily a, containing DEAD/H box 1 |           |       |    |
| -10.9 | -        | AI475680  | 243509_at   | Transcribed locus                                                                                               |           |       |    |
| -10.9 | -        | AA608834  | 242068_at   | Transcribed locus                                                                                               |           |       |    |
| -10.9 | -        | BE394201  | 226298_at   | RUN domain containing 1                                                                                         |           |       |    |
| -11.0 | -        | BF060783  | 242138_at   | Distal-less homeobox 1                                                                                          |           |       |    |
| -11.0 | -        | AW298438  | 225141_at   | Transcribed locus                                                                                               |           |       |    |
| -11.0 | -        | AW195360  | 225426_at   | Protein phosphatase 6, catalytic subunit                                                                        |           |       |    |
| -11.0 | -        | AI934347  | 226140_s_at | OTU domain containing 1                                                                                         |           |       |    |
| -11.0 | -        | AU145807  | 233196_at   | CDNA FLJ11777 fis, clone HEMBA1005909                                                                           |           |       |    |
| -11.0 | SLC35B3  | AL355815  | 222691_at   | solute carrier family 35, member B3                                                                             |           |       |    |
| -11.0 | -        | T90760    | 244357_at   | Transcribed locus                                                                                               |           |       |    |
| -11.1 | -        | BF108666  | 230435_at   | Hypothetical protein LOC375190                                                                                  |           |       |    |
| -11.1 | -        | AW140122  | 239859_x_at | Transcribed locus                                                                                               |           |       |    |
| -11.1 | -        | AW152589  | 225677_at   | B-cell receptor-associated protein 29                                                                           |           |       |    |
| -11.1 | -        | AI129941  | 229167_at   | Transcribed locus                                                                                               |           |       |    |
| -11.2 | -        | BG492359  | 226936_at   | Chromosome 6 open reading frame 173                                                                             |           |       |    |
| -11.2 | -        | BE962119  | 225603_s_at | chromosome 8 open reading frame 83                                                                              |           |       |    |
| -11.2 | SLX4     | AL442083  | 232147_at   | BTB (POZ) domain containing 12                                                                                  |           |       |    |
| -11.2 | -        | AV691296  | 232012_at   | Transcribed locus                                                                                               |           |       |    |
| -11.2 | -        | AA527531  | 225704_at   | Fibrosin-like 1                                                                                                 |           |       |    |
| -11.2 | -        | AU157155  | 225459_at   | Angiotensin like 1                                                                                              |           |       |    |
| -11.2 | -        | AI859280  | 242234_at   | XIAP associated factor 1                                                                                        |           |       |    |
| -11.3 | -        | AI692645  | 230206_at   | Dedicator of cytokinesis 5                                                                                      |           |       |    |
| -11.3 | FUCA2    | BC003060  | 223120_at   | Fucosidase, alpha-L- 2, plasma                                                                                  |           |       |    |
| -11.3 | -        | W44578    | 228775_at   | Transcribed locus                                                                                               |           |       |    |
| -11.3 | -        | AL036662  | 235984_at   | Transcribed locus                                                                                               |           |       |    |
| -11.3 | -        | L21961    | 234877_x_at | Human Ig rearranged lambda-chain mRNA, subgroup VL3, V-J region, partial cds.                                   |           |       |    |
| -11.3 | TRIM35   | AA115933  | 227102_at   | Tripartite motif-containing 35                                                                                  |           |       |    |
| -11.3 | STRIP2   | AB032996  | 231880_at   | Family with sequence similarity 40, member B                                                                    |           |       |    |
| -11.3 | -        | AA193515  | 228162_at   | Esterase D/formylglutathione hydrolase                                                                          |           |       |    |
| -11.3 | -        | AA805653  | 228180_at   | Transcribed locus                                                                                               |           |       |    |
| -11.3 | -        | AI760366  | 236907_at   | CDNA FLJ25706 fis, clone TST04817                                                                               |           |       |    |
| -11.4 | -        | AA876371  | 239081_at   | Transcribed locus                                                                                               |           |       |    |
| -11.4 | -        | AI022632  | 239405_at   | Transcribed locus                                                                                               |           |       |    |
| -11.4 | -        | AV725947  | 228760_at   | Splicing factor, arginine/serine-rich 2B                                                                        |           |       |    |
| -11.4 | -        | H10318    | 225476_at   | HLA-B associated transcript 4                                                                                   |           |       |    |
| -11.4 | -        | AW051345  | 225690_at   | Cdc2-related kinase, arginine/serine-rich                                                                       |           |       |    |
| -11.5 | -        | AA225165  | 228721_at   | Chemokine binding protein 2                                                                                     |           |       |    |
| -11.5 | B3GALNT1 | AF154848  | 223374_s_at | beta-1,3-N-acetylgalactosaminyltransferase 1 (globoside blood group)                                            |           |       |    |
| -11.5 | SKIL     | BF725121  | 217591_at   | SKI-like oncogene                                                                                               | Hs.581632 | 6498  | 3  |
| -11.5 | -        | AI871620  | 222803_at   | Phosphoribosyl transferase domain containing 1                                                                  |           |       |    |
| -11.6 | -        | BF342223  | 235035_at   | Solute carrier family 35, member E1                                                                             |           |       |    |
| -11.6 | POMP     | BC003390  | 222402_at   | Proteasome maturation protein                                                                                   |           |       |    |
| -11.6 | -        | BE893995  | 234983_at   | Transcribed locus                                                                                               |           |       |    |
| -11.6 | -        | AW182575  | 227295_at   | IKK interacting protein                                                                                         |           |       |    |
| -11.6 | -        | AI306487  | 222849_s_at | Secernin 3                                                                                                      |           |       |    |
| -11.6 | -        | AL577758  | 226515_at   | Coiled-coil domain containing 127                                                                               |           |       |    |
| -11.7 | -        | AW576195  | 227476_at   | Lysophosphatidylglycerol acyltransferase 1                                                                      |           |       |    |
| -11.7 | -        | AI279532  | 228652_at   | zinc finger protein 776                                                                                         |           |       |    |
| -11.7 | -        | BG106919  | 231810_at   | BRI3 binding protein                                                                                            |           |       |    |
| -11.8 | -        | AW051899  | 242602_x_at | Zinc finger protein 254                                                                                         |           |       |    |
| -11.8 | -        | AA994026  | 237886_at   | Transcribed locus                                                                                               |           |       |    |
| -11.8 | -        | BE464843  | 236696_at   | U2-associated SR140 protein                                                                                     |           |       |    |
| -11.8 | -        | W93048    | 224717_s_at | Chromosome 19 open reading frame 42                                                                             |           |       |    |
| -11.9 | -        | AU147698  | 215401_at   | CDNA FLJ12248 fis, clone MAMMA1001408                                                                           | Hs.661985 | -     | 13 |
| -11.9 | -        | BE856242  | 223512_at   | SAR1 homolog B (S. cerevisiae)                                                                                  |           |       |    |
| -11.9 | -        | N21600    | 224704_at   | Trinucleotide repeat containing 6A                                                                              |           |       |    |
| -12.0 | -        | BE895304  | 243452_at   | Hypothetical LOC646778                                                                                          |           |       |    |
| -12.0 | TRAPPC11 | AK023390  | 233558_s_at | Chromosome 4 open reading frame 41                                                                              |           |       |    |
| -12.1 | -        | BF970431  | 228151_at   | Transcribed locus                                                                                               |           |       |    |
| -12.1 | -        | BG540188  | 241396_at   | Neural precursor cell expressed, developmentally down-regulated 4-like                                          |           |       |    |



**Down-Regulated Transcripts (U133A 133B)**

|       |          |           |             |                                                                                                                            |           |       |    |
|-------|----------|-----------|-------------|----------------------------------------------------------------------------------------------------------------------------|-----------|-------|----|
| -12.1 | COMMD5   | BC002672  | 223198_x_at | COMM domain containing 5                                                                                                   |           |       |    |
| -12.2 | -        | BF434224  | 225543_at   | MRNA full length insert cDNA clone EUROIMAGE 1674211                                                                       |           |       |    |
| -12.2 | -        | AW275658  | 242349_at   | HECT domain containing 1                                                                                                   |           |       |    |
| -12.2 | -        | BG340967  | 225294_s_at | Trafficking protein particle complex 1                                                                                     |           |       |    |
| -12.2 | -        | AI659020  | 225161_at   | G elongation factor, mitochondrial 1                                                                                       |           |       |    |
| -12.2 | NCOA5    | AB046857  | 225145_at   | Nuclear receptor coactivator 5                                                                                             |           |       |    |
| -12.2 | -        | AW269686  | 238622_at   | RAP2B, member of RAS oncogene family                                                                                       |           |       |    |
| -12.2 | KCNK17   | AF339912  | 224049_at   | Potassium channel, subfamily K, member 17                                                                                  |           |       |    |
| -12.2 | -        | BE300882  | 244627_at   | Dihydroxyacetone kinase 2 homolog (S. cerevisiae)                                                                          |           |       |    |
| -12.3 | -        | AA961515  | 229882_at   | Ribosomal protein S15a                                                                                                     |           |       |    |
| -12.3 | -        | AI224977  | 227928_at   | Chromosome 12 open reading frame 48                                                                                        |           |       |    |
| -12.3 | -        | AW072102  | 230698_at   | Calneuron 1                                                                                                                |           |       |    |
| -12.3 | -        | AA738440  | 227840_at   | Chromosome 2 open reading frame 76                                                                                         |           |       |    |
| -12.4 | -        | AA532718  | 236545_at   | Transcribed locus                                                                                                          |           |       |    |
| -12.5 | RIPK3    | NM_006871 | 228139_at   | Receptor-interacting serine-threonine kinase 3                                                                             |           |       |    |
| -12.5 | FLJ10213 | NM_018029 | 219906_at   | Hypothetical protein FLJ10213                                                                                              | Hs.658858 | 55096 | 3  |
| -12.5 | -        | AI672432  | 229211_at   | Dual specificity phosphatase 28                                                                                            |           |       |    |
| -12.6 | AUNIP    | BC000209  | 222946_s_at | Chromosome 1 open reading frame 135                                                                                        |           |       |    |
| -12.6 | AVP      | NM_000490 | 207848_at   | Arginine vasopressin                                                                                                       | Hs.89648  | 551   | 20 |
| -12.6 | -        | AI554705  | 226378_s_at | Chromosome 19 open reading frame 25                                                                                        |           |       |    |
| -12.6 | -        | BF109310  | 236593_at   | Similar to hCG1775037                                                                                                      |           |       |    |
| -12.6 | -        | AJ001863  | 234264_at   | MRNA partial cDNA sequence from cDNA selection, DCR1-8.0                                                                   |           |       |    |
| -12.7 | -        | AU146891  | 227798_at   | SMAD family member 1                                                                                                       |           |       |    |
| -12.7 | -        | AI146450  | 228073_at   | N-acetylneuraminic acid phosphatase                                                                                        |           |       |    |
| -12.7 | -        | AA287457  | 226943_at   | Chromosome 12 open reading frame 73                                                                                        |           |       |    |
| -12.8 | -        | NM_024826 | 220145_at   | microtubule-associated protein 9                                                                                           | -         | 79884 | -  |
| -12.8 | -        | AW293012  | 236989_at   | Transcribed locus                                                                                                          |           |       |    |
| -12.9 | -        | AI972094  | 232175_at   | Transcribed locus, weakly similar to NP_001006352.1 ADP-ribosylation factor 1 [Gallus gallus]                              |           |       |    |
| -12.9 | -        | BF032717  | 232129_s_at | Leucine zipper, putative tumor suppressor 2                                                                                |           |       |    |
| -12.9 | -        | AI274095  | 232224_at   | Mannan-binding lectin serine peptidase 1 (C4/2 activating component of Ra-reactive factor)                                 |           |       |    |
| -12.9 | -        | BF433103  | 230868_at   | Transcribed locus                                                                                                          |           |       |    |
| -12.9 | RERE     | H71242    | 242407_at   | Consensus includes gb:H71242 /FEA=EST /DB_XREF=gi:1043058 /DB_XREF=est:ys12g09.s1 /CLONE=IMAGE:214624 /UG=Hs.117864 ESTs   |           |       |    |
| -13.0 | -        | AI458003  | 228665_at   | Cysteine/tyrosine-rich 1                                                                                                   |           |       |    |
| -13.0 | SCYL1    | AF297709  | 223033_s_at | SCY1-like 1 (S. cerevisiae)                                                                                                |           |       |    |
| -13.0 | -        | T86344    | 238657_at   | UBX domain protein 10                                                                                                      |           |       |    |
| -13.0 | -        | AV758821  | 235052_at   | Zinc finger protein 792                                                                                                    |           |       |    |
| -13.0 | -        | AA088857  | 235871_at   | Lipase, member H                                                                                                           |           |       |    |
| -13.0 | -        | AA778095  | 243966_at   | Consensus includes gb:AA778095 /FEA=EST /DB_XREF=gi:2837496 /DB_XREF=est:zf43f09.s1 /CLONE=IMAGE:379721 /UG=Hs.191593 ESTs |           |       |    |
| -13.1 | -        | AK026630  | 234947_s_at | Chromosome 10 open reading frame 84                                                                                        |           |       |    |
| -13.1 | -        | AA632758  | 232615_at   | Transcribed locus                                                                                                          |           |       |    |
| -13.1 | -        | AW972855  | 222315_at   | Consensus includes gb:AW972855 /FEA=EST /DB_XREF=gi:8162701 /DB_XREF=est:EST384950 /UG=Hs.292853 ESTs                      | -         | -     | -  |
| -13.1 | -        | AA156998  | 227006_at   | Protein phosphatase 1, regulatory (inhibitor) subunit 14A                                                                  |           |       |    |
| -13.1 | -        | AW362945  | 242558_at   | CDNA FLJ45490 fis, clone BRTHA2005831                                                                                      |           |       |    |
| -13.2 | -        | BE514414  | 226473_at   | Chromobox homolog 2 (Pc class homolog, Drosophila)                                                                         |           |       |    |
| -13.2 | -        | BF433759  | 230295_at   | Small optic lobes homolog (Drosophila)                                                                                     |           |       |    |
| -13.2 | -        | AI925574  | 226707_at   | Nicotinate phosphoribosyltransferase domain containing 1                                                                   |           |       |    |
| -13.2 | MLF1     | NM_022443 | 204784_s_at | Myeloid leukemia factor 1                                                                                                  | Hs.85195  | 4291  | 3  |
| -13.3 | -        | AI701170  | 231370_at   | Transcribed locus                                                                                                          |           |       |    |
| -13.3 | -        | AW057545  | 223083_s_at | Egl nine homolog 2 (C. elegans)                                                                                            |           |       |    |
| -13.3 | -        | R61857    | 243992_at   | Transcribed locus                                                                                                          |           |       |    |
| -13.4 | NR4A2    | AI935096  | 204621_s_at | Nuclear receptor subfamily 4, group A, member 2                                                                            | Hs.563344 | 4929  | 2  |
| -13.4 | RNF135   | BC005084  | 223591_at   | Ring finger protein 135                                                                                                    |           |       |    |
| -13.4 | -        | AA778938  | 244700_at   | Sec61 beta subunit                                                                                                         |           |       |    |
| -13.4 | MAFF     | NM_012323 | 205193_at   | V-maf musculoaponeurotic fibrosarcoma oncogene homolog F (avian)                                                           | Hs.517617 | 23764 | 22 |
| -13.5 | -        | N49841    | 228144_at   | Zinc finger protein 300                                                                                                    |           |       |    |
| -13.5 | -        | AA894611  | 228595_at   | hydroxysteroid (17-beta) dehydrogenase 1                                                                                   |           |       |    |
| -13.5 | -        | BF446688  | 227573_s_at | Obscurin-like 1                                                                                                            |           |       |    |
| -13.5 | -        | AI675152  | 229264_at   | Hypothetical protein LOC100132999                                                                                          |           |       |    |
| -13.5 | -        | AW514783  | 225323_at   | coiled-coil and C2 domain containing 1B                                                                                    |           |       |    |
| -13.5 | FUBP1    | N54783    | 240307_at   | Transcribed locus                                                                                                          |           |       |    |

**Down-Regulated Transcripts (U133A 133B)**

|       |          |           |             |                                                                                                                                                                            |           |        |   |
|-------|----------|-----------|-------------|----------------------------------------------------------------------------------------------------------------------------------------------------------------------------|-----------|--------|---|
| -13.6 | -        | AI708334  | 230029_x_at | Ubiquitin protein ligase E3 component n-recognin 3 (putative)                                                                                                              |           |        |   |
| -13.6 | C6orf223 | BF515759  | 239137_x_at | Chromosome 6 open reading frame 223                                                                                                                                        |           |        |   |
| -13.6 | -        | AW451683  | 231023_at   | CysteinyI-tRNA synthetase 2, mitochondrial (putative)                                                                                                                      |           |        |   |
| -13.6 | -        | AU152456  | 226217_at   | Solute carrier family 30 (zinc transporter), member 7                                                                                                                      |           |        |   |
| -13.7 | -        | AA872471  | 242146_at   | Small nuclear ribonucleoprotein polypeptide A'                                                                                                                             |           |        |   |
| -13.7 | -        | AV713913  | 235198_at   | Osteopetrosis associated transmembrane protein 1                                                                                                                           |           |        |   |
| -13.8 | -        | BF740245  | 227579_at   | CDNA FLJ35001 fis, clone OCBBF2011887                                                                                                                                      |           |        |   |
| -13.8 | -        | BF676081  | 225880_at   | Consensus includes gb:BF676081 /FEA=EST /DB_XREF=gi:11949976 /DB_XREF=est:602084056F1 /CLONE=IMAGE:4248445 /UG=Hs.24359 Homo sapiens cDNA FLJ11174 fis, clone PLACE1007367 |           |        |   |
| -13.8 | -        | AI807103  | 222473_s_at | ErbB2 interacting protein                                                                                                                                                  |           |        |   |
| -13.9 | -        | BF592842  | 243913_at   | Transcribed locus                                                                                                                                                          |           |        |   |
| -13.9 | C12orf65 | AF061733  | 223477_s_at | Chromosome 12 open reading frame 65                                                                                                                                        |           |        |   |
| -13.9 | YAE1D1   | AF226046  | 223433_at   | Chromosome 7 open reading frame 36                                                                                                                                         |           |        |   |
| -14.0 | RBM33    | AL137724  | 231833_at   | RNA binding motif protein 33                                                                                                                                               |           |        |   |
| -14.0 | -        | AA618420  | 225792_at   | Hook homolog 1 (Drosophila)                                                                                                                                                |           |        |   |
| -14.1 | -        | BG028213  | 225581_s_at | Mitochondrial ribosomal protein L50                                                                                                                                        |           |        |   |
| -14.1 | -        | AI969773  | 227430_at   | Zinc finger CCCH-type containing 10                                                                                                                                        |           |        |   |
| -14.1 | IFFO2    | AK024480  | 225615_at   | Intermediate filament family orphan 2                                                                                                                                      |           |        |   |
| -14.1 | -        | AW793677  | 243527_at   | Consensus includes gb:AW793677 /FEA=EST /DB_XREF=gi:7845547 /DB_XREF=est:MR1-UM0008-200300-004-c02 /UG=Hs.190334 ESTs                                                      |           |        |   |
| -14.2 | -        | AK026487  | 234192_s_at | G kinase anchoring protein 1                                                                                                                                               |           |        |   |
| -14.2 | -        | AI950069  | 242939_at   | Transcription factor Dp-1                                                                                                                                                  |           |        |   |
| -14.3 | -        | AW139300  | 230659_at   | Transcribed locus                                                                                                                                                          |           |        |   |
| -14.3 | -        | AI803568  | 239313_at   | Hypothetical LOC401320                                                                                                                                                     |           |        |   |
| -14.3 | -        | AW269397  | 225564_at   | Spermatogenesis associated 13                                                                                                                                              |           |        |   |
| -14.3 | -        | AI524068  | 242066_at   | CDNA FLJ36420 fis, clone THYMU2011257                                                                                                                                      |           |        |   |
| -14.3 | -        | BE738988  | 238790_at   | CLR pseudogene                                                                                                                                                             |           |        |   |
| -14.4 | -        | BF508977  | 243213_at   | Transcribed locus                                                                                                                                                          |           |        |   |
| -14.5 | -        | AI640434  | 241627_x_at | Full length insert cDNA clone YI72E07                                                                                                                                      |           |        |   |
| -14.5 | -        | AI742582  | 229920_at   | Transcribed locus                                                                                                                                                          |           |        |   |
| -14.5 | -        | AI745624  | 226982_at   | Elongation factor, RNA polymerase II, 2                                                                                                                                    |           |        |   |
| -14.5 | -        | AI733360  | 240126_x_at | Bromodomain PHD finger transcription factor                                                                                                                                |           |        |   |
| -14.5 | -        | BF062287  | 236609_at   | Hypothetical protein LOC100129592                                                                                                                                          |           |        |   |
| -14.5 | -        | AW105337  | 225969_at   | AlkB, alkylation repair homolog 6 (E. coli)                                                                                                                                |           |        |   |
| -14.6 | -        | BF336159  | 239494_at   | Transcribed locus                                                                                                                                                          |           |        |   |
| -14.6 | -        | AF339815  | 233434_at   | Clone IMAGE:32553, mRNA sequence                                                                                                                                           |           |        |   |
| -14.6 | -        | AI439157  | 226387_at   | Round spermatid basic protein 1-like                                                                                                                                       |           |        |   |
| -14.6 | -        | AW009630  | 227368_at   | Transcribed locus, moderately similar to XP_001091208.1 PREDICTED: hypothetical protein [Macaca mulatta]                                                                   |           |        |   |
| -14.7 | -        | BF194875  | 239709_at   | Transcribed locus                                                                                                                                                          |           |        |   |
| -14.7 | -        | AW006941  | 230677_at   | Chromosome 14 open reading frame 73                                                                                                                                        |           |        |   |
| -14.7 | -        | AI817145  | 227751_at   | Programmed cell death 5                                                                                                                                                    |           |        |   |
| -14.7 | -        | BG231494  | 225955_at   | Similar to meteorin, glial cell differentiation regulator-like                                                                                                             |           |        |   |
| -14.7 | -        | BE896490  | 239084_at   | Synaptosomal-associated protein, 29kDa                                                                                                                                     |           |        |   |
| -14.8 | -        | AA760738  | 229483_at   | CDNA FLJ42331 fis, clone TSTOM2000588                                                                                                                                      |           |        |   |
| -14.8 | -        | AA705029  | 239474_at   | Transcribed locus                                                                                                                                                          |           |        |   |
| -14.9 | -        | AU150386  | 229355_at   | Transcribed locus                                                                                                                                                          |           |        |   |
| -14.9 | NLRP3    | NM_004895 | 207075_at   | NLR family, pyrin domain containing 3                                                                                                                                      | Hs.159483 | 114548 | 1 |
| -15.0 | -        | AW291023  | 235508_at   | Promyelocytic leukemia                                                                                                                                                     |           |        |   |
| -15.0 | -        | AI972367  | 238547_at   | Hexamethylene bis-acetamide inducible 2                                                                                                                                    |           |        |   |
| -15.2 | -        | AL540867  | 225605_at   | Tumor protein p53 inducible protein 13                                                                                                                                     |           |        |   |
| -15.2 | -        | BE856657  | 226135_at   | Transcribed locus                                                                                                                                                          |           |        |   |
| -15.3 | -        | AV700298  | 217523_at   | CD44 molecule (Indian blood group)                                                                                                                                         | -         | -      | - |
| -15.3 | -        | AI085534  | 242765_at   | Myelin-associated oligodendrocyte basic protein                                                                                                                            |           |        |   |
| -15.3 | PTX3     | NM_002852 | 206157_at   | Pentraxin-related gene, rapidly induced by IL-1 beta                                                                                                                       | Hs.591286 | 5806   | 3 |
| -15.4 | -        | AI016894  | 228326_at   | WD repeat domain 27                                                                                                                                                        |           |        |   |
| -15.4 | -        | AI927382  | 228330_at   | Zinc finger with UFM1-specific peptidase domain                                                                                                                            |           |        |   |
| -15.4 | -        | AI791138  | 242968_at   | Transcribed locus                                                                                                                                                          |           |        |   |
| -15.4 | NAV1     | AB033039  | 233870_at   | Neuron navigator 1                                                                                                                                                         |           |        |   |
| -15.5 | -        | AL542359  | 225593_at   | LSM10, U7 small nuclear RNA associated                                                                                                                                     |           |        |   |
| -15.5 | -        | AW081685  | 236553_at   | Transcribed locus                                                                                                                                                          |           |        |   |
| -15.5 | -        | AI820875  | 230634_x_at | Secretory carrier membrane protein 4                                                                                                                                       |           |        |   |
| -15.5 | -        | AA480858  | 230413_s_at | Transcribed locus                                                                                                                                                          |           |        |   |
| -15.5 | UBXN6    | AF272894  | 223012_at   | UBX domain protein 6                                                                                                                                                       |           |        |   |

### Down-Regulated Transcripts (U133A 133B)

|       |          |          |             |                                                                                                                                                                                                                               |           |   |   |
|-------|----------|----------|-------------|-------------------------------------------------------------------------------------------------------------------------------------------------------------------------------------------------------------------------------|-----------|---|---|
| -15.6 | GAB1     | AK022142 | 226002_at   | GRB2-associated binding protein 1                                                                                                                                                                                             |           |   |   |
| -15.6 | ALG1     | BC004402 | 223355_at   | Asparagine-linked glycosylation 1, beta-1,4-mannosyltransferase homolog (S. cerevisiae)                                                                                                                                       |           |   |   |
| -15.6 | -        | AW449624 | 239379_at   | Leucine rich repeat (in FLII) interacting protein 1                                                                                                                                                                           |           |   |   |
| -15.7 | -        | AW205664 | 231406_at   | ORAI calcium release-activated calcium modulator 2                                                                                                                                                                            |           |   |   |
| -15.7 | -        | AI758223 | 228268_at   | Flavin containing monooxygenase 2 (non-functional)                                                                                                                                                                            |           |   |   |
| -15.7 | 61E3.4   | AC003007 | 231989_s_at | SMG1 homolog, phosphatidylinositol 3-kinase-related kinase pseudogene                                                                                                                                                         |           |   |   |
| -15.7 | NRBF2    | AF267866 | 223650_s_at | Nuclear receptor binding factor 2                                                                                                                                                                                             |           |   |   |
| -15.8 | -        | BF515959 | 230526_at   | Hypothetical LOC100131096                                                                                                                                                                                                     |           |   |   |
| -15.9 | -        | AU144266 | 231057_at   | Consensus includes gb:AU144266 /FEA=EST /DB_XREF=gi:11005787 /DB_XREF=est:AU144266 /CLONE=HEMBA1001395 /UG=Hs.269908 Homo sapiens cDNA FLJ11991 fis, clone HEMBB1001424                                                       |           |   |   |
| -15.9 | -        | N29918   | 228562_at   | Transcribed locus                                                                                                                                                                                                             |           |   |   |
| -15.9 | -        | AA045042 | 227317_at   | LIM and cysteine-rich domains 1                                                                                                                                                                                               |           |   |   |
| -15.9 | -        | AI024610 | 233340_at   | Serine PI Kazal type 5-like 3                                                                                                                                                                                                 |           |   |   |
| -15.9 | -        | BF195340 | 238000_at   | Transcribed locus                                                                                                                                                                                                             |           |   |   |
| -16.0 | -        | BE326857 | 235719_at   | Kallikrein B, plasma (Fletcher factor) 1                                                                                                                                                                                      |           |   |   |
| -16.0 | -        | AA169554 | 244334_at   | Translocation associated membrane protein 1-like 1                                                                                                                                                                            |           |   |   |
| -16.0 | C6orf203 | AF151064 | 223576_at   | Chromosome 6 open reading frame 203                                                                                                                                                                                           |           |   |   |
| -16.0 | -        | AW590090 | 241096_at   | Transcribed locus                                                                                                                                                                                                             |           |   |   |
| -16.1 | -        | R05895   | 239512_at   | splicing factor, arginine/serine-rich 4                                                                                                                                                                                       |           |   |   |
| -16.2 | SERAC1   | AA128978 | 232183_at   | Serine active site containing 1                                                                                                                                                                                               |           |   |   |
| -16.2 | -        | H22448   | 242530_at   | CDNA FLJ37676 fis, clone BRHIP2012627                                                                                                                                                                                         |           |   |   |
| -16.2 | -        | BF109303 | 227415_at   | Diacylglycerol kinase, eta                                                                                                                                                                                                    |           |   |   |
| -16.2 | -        | AA830144 | 243037_at   | Consensus includes gb:AA830144 /FEA=EST /DB_XREF=gi:2903243 /DB_XREF=est:oc44e12.s1 /CLONE=IMAGE:1352590 /UG=Hs.135613 ESTS, Moderately similar to ALU6_HUMAN ALU SUBFAMILY SP SEQUENCE CONTAMINATION WARNING ENTRY H.sapiens |           |   |   |
| -16.3 | -        | AI433468 | 238804_at   | Transcribed locus                                                                                                                                                                                                             |           |   |   |
| -16.3 | -        | N32860   | 230854_at   | Transcribed locus                                                                                                                                                                                                             |           |   |   |
| -16.3 | -        | BF431867 | 239619_at   | Consensus includes gb:BF431867 /FEA=EST /DB_XREF=gi:11443981 /DB_XREF=est:nab76b05.x1 /CLONE=IMAGE:3273560 /UG=Hs.253177 ESTS                                                                                                 |           |   |   |
| -16.4 | -        | AA827728 | 244341_at   | Transcribed locus                                                                                                                                                                                                             |           |   |   |
| -16.4 | -        | AI695695 | 242051_at   | Transcribed locus                                                                                                                                                                                                             |           |   |   |
| -16.4 | -        | AW292746 | 228098_s_at | Myosin regulatory light chain interacting protein                                                                                                                                                                             |           |   |   |
| -16.5 | -        | AW983691 | 235940_at   | Chromosome 9 open reading frame 64                                                                                                                                                                                            |           |   |   |
| -16.5 | RAD18    | AB035274 | 224200_s_at | RAD18 homolog (S. cerevisiae)                                                                                                                                                                                                 |           |   |   |
| -16.5 | -        | AI087792 | 231136_at   | Transcribed locus                                                                                                                                                                                                             |           |   |   |
| -16.5 | -        | AA099118 | 226308_at   | HAUS augmin-like complex, subunit 8                                                                                                                                                                                           |           |   |   |
| -16.5 | -        | AW057518 | 240038_at   | Transcribed locus                                                                                                                                                                                                             |           |   |   |
| -16.6 | -        | AI264121 | 227276_at   | Plexin domain containing 2                                                                                                                                                                                                    |           |   |   |
| -16.7 | -        | BE645242 | 229219_s_at | N-terminal asparagine amidase                                                                                                                                                                                                 |           |   |   |
| -16.7 | -        | AV706971 | 230673_at   | Polycystic kidney and hepatic disease 1 (autosomal recessive)-like 1                                                                                                                                                          |           |   |   |
| -16.8 | -        | AI669235 | 222869_s_at | ElaC homolog 1 (E. coli)                                                                                                                                                                                                      |           |   |   |
| -16.8 | -        | AA938184 | 236312_at   | Transcribed locus                                                                                                                                                                                                             |           |   |   |
| -16.8 | -        | AW130077 | 230032_at   | Transcribed locus                                                                                                                                                                                                             |           |   |   |
| -16.8 | -        | BE790884 | 224982_at   | AKT1 substrate 1 (proline-rich)                                                                                                                                                                                               |           |   |   |
| -16.9 | -        | AW300612 | 243947_s_at | Transcribed locus                                                                                                                                                                                                             |           |   |   |
| -16.9 | -        | AW444778 | 228031_at   | Tocopherol (alpha) transfer protein-like                                                                                                                                                                                      |           |   |   |
| -16.9 | -        | BF575466 | 232082_x_at | small proline-rich protein 3                                                                                                                                                                                                  |           |   |   |
| -16.9 | -        | BF510801 | 222505_at   | Limb region 1 homolog (mouse)                                                                                                                                                                                                 |           |   |   |
| -16.9 | -        | BF508609 | 230934_at   | Serine/threonine kinase 32C                                                                                                                                                                                                   |           |   |   |
| -16.9 | -        | BF725804 | 243209_at   | Potassium voltage-gated channel, KQT-like subfamily, member 4                                                                                                                                                                 |           |   |   |
| -17.0 | SPAG5AS1 | AL157421 | 231542_at   | CDNA FLJ25772 fis, clone TST06461                                                                                                                                                                                             |           |   |   |
| -17.0 | OR2H4P   | AJ302634 | 234760_at   | Homo sapiens 6M1-7P*01 pseudogene, cell line LG2                                                                                                                                                                              |           |   |   |
| -17.0 | -        | AW512339 | 239328_at   | CDNA FLJ35362 fis, clone SKMUS2000330                                                                                                                                                                                         |           |   |   |
| -17.1 | -        | AW450206 | 243856_at   | Transcribed locus                                                                                                                                                                                                             |           |   |   |
| -17.1 | -        | AF116659 | 210717_at   | Transcribed locus                                                                                                                                                                                                             | Hs.621370 | - | 5 |
| -17.2 | -        | BF513404 | 239469_at   | Transcribed locus                                                                                                                                                                                                             |           |   |   |
| -17.2 | -        | AA401429 | 229106_at   | Dynein, light chain, LC8-type 2                                                                                                                                                                                               |           |   |   |
| -17.2 | -        | AI640483 | 235536_at   | Ring finger protein 149                                                                                                                                                                                                       |           |   |   |
| -17.3 | -        | AI354636 | 235171_at   | Transcribed locus                                                                                                                                                                                                             |           |   |   |
| -17.4 | -        | AW002876 | 237034_at   | Transcribed locus, strongly similar to XP_001164900.1 PREDICTED: hypothetical protein [Pan troglodytes]                                                                                                                       |           |   |   |
| -17.4 | -        | AI708256 | 229342_at   | CDNA FLJ32162 fis, clone PLACE6000325                                                                                                                                                                                         |           |   |   |

### Down-Regulated Transcripts (U133A 133B)

|       |           |          |             |                                                                        |  |  |  |
|-------|-----------|----------|-------------|------------------------------------------------------------------------|--|--|--|
| -17.4 | -         | AL044007 | 229828_at   | Transcribed locus                                                      |  |  |  |
| -17.5 | -         | AA228366 | 236251_at   | Transcribed locus                                                      |  |  |  |
| -17.5 | -         | BE671123 | 235798_at   | Transmembrane protein 170B                                             |  |  |  |
| -17.5 | ZHX1      | AF195766 | 223214_s_at | Zinc fingers and homeoboxes 1                                          |  |  |  |
| -17.6 | -         | AI332536 | 242780_at   | VAMP (vesicle-associated membrane protein)-associated protein A, 33kDa |  |  |  |
| -17.6 | -         | AA504356 | 229467_at   | Poly(rC) binding protein 2                                             |  |  |  |
| -17.7 | DNAJC27   | AL117490 | 223504_at   | Dnaj (Hsp40) homolog, subfamily C, member 27                           |  |  |  |
| -17.7 | -         | BE467566 | 236982_at   | CDNA clone IMAGE:5270500                                               |  |  |  |
| -17.7 | -         | AW003508 | 226688_at   | Chromosome 3 open reading frame 23                                     |  |  |  |
| -17.7 | SLC7A6OS  | AK023353 | 232057_at   | Solute carrier family 7, member 6 opposite strand                      |  |  |  |
| -17.9 | -         | AV724827 | 224881_at   | Vitamin K epoxide reductase complex, subunit 1-like 1                  |  |  |  |
| -17.9 | MND1      | AY028916 | 223700_at   | Meiotic nuclear divisions 1 homolog (S. cerevisiae)                    |  |  |  |
| -17.9 | -         | AA702946 | 242646_at   | Transcribed locus                                                      |  |  |  |
| -18.0 | -         | AV753357 | 242975_s_at | Transcribed locus                                                      |  |  |  |
| -18.0 | -         | AA204752 | 243904_at   | CDNA clone IMAGE:5287121                                               |  |  |  |
| -18.0 | MRPL35    | AK026220 | 222775_s_at | Mitochondrial ribosomal protein L35                                    |  |  |  |
| -18.1 | -         | AA824624 | 239531_at   | Transcribed locus                                                      |  |  |  |
| -18.1 | ZNF577    | BC004992 | 223581_at   | Zinc finger protein 577                                                |  |  |  |
| -18.1 | -         | BF594228 | 237696_at   | Transcribed locus                                                      |  |  |  |
| -18.2 | -         | AA490685 | 227792_at   | Transcribed locus                                                      |  |  |  |
| -18.2 | -         | AA629944 | 243664_at   | Thioredoxin-like 1                                                     |  |  |  |
| -18.4 | -         | AU144093 | 222716_s_at | Sorting nexin 24                                                       |  |  |  |
| -18.4 | -         | AI912566 | 239518_at   | Transcribed locus                                                      |  |  |  |
| -18.5 | -         | AI939472 | 237510_at   | Myoneurin                                                              |  |  |  |
| -18.5 | -         | AI733222 | 237728_at   | Transcribed locus                                                      |  |  |  |
| -18.5 | -         | BE467907 | 230346_x_at | Transcribed locus                                                      |  |  |  |
| -18.5 | -         | AA062971 | 225774_at   | Ring finger and SPRY domain containing 1                               |  |  |  |
| -18.5 | -         | BE550957 | 231036_at   | Transcribed locus                                                      |  |  |  |
| -18.6 | -         | BF793552 | 226161_at   | Solute carrier family 30 (zinc transporter), member 6                  |  |  |  |
| -18.6 | -         | AI799695 | 230685_at   | Hypothetical LOC644873                                                 |  |  |  |
| -18.7 | -         | BE736287 | 241606_s_at | TruB pseudouridine (psi) synthase homolog 1 (E. coli)                  |  |  |  |
| -18.8 | -         | AI769569 | 235457_at   | Mastermind-like 2 (Drosophila)                                         |  |  |  |
| -18.9 | TBCD      | AL096745 | 229192_s_at | Tubulin folding cofactor D                                             |  |  |  |
| -19.0 | -         | AU157441 | 226511_at   | WD repeat domain 32                                                    |  |  |  |
| -19.0 | -         | BF059124 | 229879_at   | Transcribed locus                                                      |  |  |  |
| -19.1 | -         | AI471969 | 239278_at   | CDNA clone IMAGE:5301129                                               |  |  |  |
| -19.1 | -         | AI821399 | 242877_at   | Transcribed locus                                                      |  |  |  |
| -19.1 | -         | BG028209 | 230521_at   | Chromosome 9 open reading frame 100                                    |  |  |  |
| -19.2 | ATG7      | BC000091 | 224025_s_at | ATG7 autophagy related 7 homolog (S. cerevisiae)                       |  |  |  |
| -19.2 | -         | AL039862 | 225864_at   | Family with sequence similarity 84, member B                           |  |  |  |
| -19.3 | -         | AA534210 | 225679_at   | N-acetyltransferase 12 (GCN5-related, putative)                        |  |  |  |
| -19.3 | -         | AA725644 | 228982_s_at | Ubiquitin specific peptidase 42                                        |  |  |  |
| -19.4 | EIF4E3    | AL161983 | 225939_at   | Eukaryotic translation initiation factor 4E family member 3            |  |  |  |
| -19.4 | -         | W90446   | 243314_at   | Transcribed locus                                                      |  |  |  |
| -19.4 | -         | AI741739 | 230484_at   | Choline dehydrogenase                                                  |  |  |  |
| -19.6 | -         | N57510   | 234998_at   | CDNA clone IMAGE:5313062                                               |  |  |  |
| -19.7 | -         | AL534848 | 225620_at   | Similar to hCG1778032                                                  |  |  |  |
| -19.7 | -         | AW138883 | 236821_at   | Transcribed locus                                                      |  |  |  |
| -19.7 | LOC438848 | AL117475 | 233618_at   | MRNA; cDNA DKFpZ727C211 (from clone DKFpZ727C211)                      |  |  |  |
| -19.8 | -         | AI765886 | 230758_at   | Gem (nuclear organelle) associated protein 8                           |  |  |  |
| -20.0 | -         | BE219849 | 240180_at   | MRNA full length insert cDNA clone EUROIMAGE 1090207                   |  |  |  |
| -20.0 | -         | AK023264 | 233068_at   | CDNA FLJ13202 fis, clone NT2RP3004503                                  |  |  |  |
| -20.0 | -         | AU147777 | 232145_at   | Transcribed locus                                                      |  |  |  |
| -20.2 | -         | AL531790 | 226958_s_at | Mediator complex subunit 11                                            |  |  |  |
| -20.2 | OR4A1P    | AF065869 | 234395_at   | olfactory receptor, family 4, subfamily A, member 1 pseudogene         |  |  |  |
| -20.2 | NRIP3     | AJ400877 | 222900_at   | nuclear receptor interacting protein 3                                 |  |  |  |
| -20.3 | -         | W90764   | 230077_at   | Succinate dehydrogenase complex, subunit A, flavoprotein pseudogene 1  |  |  |  |
| -20.3 | -         | AW151660 | 239744_at   | Transcribed locus                                                      |  |  |  |
| -20.4 | -         | AI473843 | 239436_at   | Cysteine and histidine-rich domain (CHORD)-containing 1                |  |  |  |
| -20.4 | -         | BF541967 | 238551_at   | fucosyltransferase 11 (alpha (1,3) fucosyltransferase)                 |  |  |  |
| -20.5 | -         | AA769986 | 241425_at   | Nucleoporin like 1                                                     |  |  |  |
| -20.6 | ETNK1     | BC006111 | 224454_at   | Ethanolamine kinase 1                                                  |  |  |  |
| -20.6 | -         | AA025858 | 227138_at   | Cartilage associated protein                                           |  |  |  |
| -20.6 | HSPA12B   | AL109804 | 234610_at   | heat shock 70kD protein 12B                                            |  |  |  |
| -20.6 | MEX3B     | AL136778 | 223627_at   | Mex-3 homolog B (C. elegans)                                           |  |  |  |

### Down-Regulated Transcripts (U133A 133B)

|       |           |          |             |                                                                                                                                            |  |  |  |
|-------|-----------|----------|-------------|--------------------------------------------------------------------------------------------------------------------------------------------|--|--|--|
| -20.7 | -         | BG413366 | 236704_at   | MRNA; cDNA DKFZp686N0886 (from clone DKFZp686N0886)                                                                                        |  |  |  |
| -20.7 | -         | AK026189 | 229280_s_at | Hypothetical locus LOC401237                                                                                                               |  |  |  |
| -20.7 | -         | BE882538 | 227945_at   | TBC1 (tre-2)/USP6, BUB2, cdc16 domain family, member 1                                                                                     |  |  |  |
| -20.8 | LONRF1    | AA007596 | 242379_at   | Transcribed locus                                                                                                                          |  |  |  |
| -20.9 | -         | BF801735 | 238712_at   | Transcribed locus                                                                                                                          |  |  |  |
| -20.9 | -         | AI669749 | 229285_at   | Ribonuclease L (2',5'-oligoadenylate synthetase-dependent)                                                                                 |  |  |  |
| -21.0 | -         | BF432941 | 231055_at   | Consensus includes gb:BF432941 /FEA=EST /DB_XREF=gi:11445104 /DB_XREF=est:7n28g07.x1 /CLONE=IMAGE:3566028 /UG=Hs.263462 ESTs               |  |  |  |
| -21.0 | -         | W46994   | 229417_at   | Transcribed locus                                                                                                                          |  |  |  |
| -21.0 | -         | AW206286 | 239823_at   | Transcribed locus                                                                                                                          |  |  |  |
| -21.1 | MED17     | AK022156 | 232483_at   | mediator complex subunit 17                                                                                                                |  |  |  |
| -21.1 | -         | AI807950 | 229849_at   | Transcribed locus                                                                                                                          |  |  |  |
| -21.1 | GPATCH2L  | AB032978 | 229514_at   | chromosome 14 open reading frame 118                                                                                                       |  |  |  |
| -21.1 | -         | AW665440 | 226619_at   | SUMO1/sentrin specific peptidase 1                                                                                                         |  |  |  |
| -21.1 | -         | AI357143 | 239826_at   | Transcribed locus                                                                                                                          |  |  |  |
| -21.2 | LINC00467 | BC005997 | 224443_at   | chromosome 1 open reading frame 97                                                                                                         |  |  |  |
| -21.2 | -         | AL566294 | 236699_at   | CDNA FLJ90129 fis, clone HEMBB1000309                                                                                                      |  |  |  |
| -21.2 | -         | AW089574 | 229966_at   | Ewing sarcoma breakpoint region 1                                                                                                          |  |  |  |
| -21.3 | -         | AW025411 | 242040_at   | Glucosaminyl (N-acetyl) transferase family member 7                                                                                        |  |  |  |
| -21.4 | -         | AI076335 | 236019_at   | RAB12, member RAS oncogene family                                                                                                          |  |  |  |
| -21.4 | -         | BE675229 | 243350_at   | Transcribed locus                                                                                                                          |  |  |  |
| -21.4 | USP31     | AB033029 | 226033_at   | Ubiquitin specific peptidase 31                                                                                                            |  |  |  |
| -21.5 | -         | BG330541 | 231763_at   | polymerase (RNA) III (DNA directed) polypeptide A, 155kDa                                                                                  |  |  |  |
| -21.5 | -         | N66622   | 227036_at   | Full length insert cDNA YH97B03                                                                                                            |  |  |  |
| -21.5 | -         | AA778694 | 228566_at   | Regulation of nuclear pre-mRNA domain containing 1A                                                                                        |  |  |  |
| -21.5 | -         | AI809760 | 236213_at   | Transcribed locus, strongly similar to XP_001716704.1 PREDICTED: hypothetical protein [Homo sapiens]                                       |  |  |  |
| -21.5 | -         | AI769954 | 229398_at   | Transcribed locus                                                                                                                          |  |  |  |
| -21.5 | -         | AW674195 | 243372_at   | Heat shock 60kDa protein 1 (chaperonin)                                                                                                    |  |  |  |
| -21.5 | FAM135B   | AF131744 | 224001_at   | Family with sequence similarity 135, member B                                                                                              |  |  |  |
| -21.5 | -         | AI475574 | 236625_at   | Transcribed locus                                                                                                                          |  |  |  |
| -21.6 | -         | AI261321 | 235349_at   | Family with sequence similarity 82, member A1                                                                                              |  |  |  |
| -21.6 | -         | AI474448 | 227294_at   | Zinc finger protein 689                                                                                                                    |  |  |  |
| -21.6 | -         | BF196963 | 243054_at   | Transcribed locus                                                                                                                          |  |  |  |
| -21.9 | -         | AI092930 | 227693_at   | WD repeat domain 20                                                                                                                        |  |  |  |
| -21.9 | -         | AA887211 | 243951_at   | ATP-binding cassette, sub-family B (MDR/TAP), member 1                                                                                     |  |  |  |
| -21.9 | -         | AL563297 | 227757_at   | Cullin 4A                                                                                                                                  |  |  |  |
| -22.0 | -         | AI954700 | 225348_at   | FUS interacting protein (serine/arginine-rich) 1                                                                                           |  |  |  |
| -22.0 | -         | AW470714 | 229739_s_at | Family with sequence similarity 116, member B                                                                                              |  |  |  |
| -22.1 | -         | AV652437 | 243487_at   | AF4/FMR2 family, member 4                                                                                                                  |  |  |  |
| -22.1 | -         | AW969030 | 239616_at   | REX2, RNA exonuclease 2 homolog (S. cerevisiae)                                                                                            |  |  |  |
| -22.1 | PNPLA3    | AK025665 | 233030_at   | Patatin-like phospholipase domain containing 3                                                                                             |  |  |  |
| -22.2 | -         | AI768826 | 229202_at   | Transcribed locus                                                                                                                          |  |  |  |
| -22.2 | -         | AI653013 | 237150_at   | Transcribed locus                                                                                                                          |  |  |  |
| -22.3 | -         | AA973041 | 225702_at   | Chromosome 8 open reading frame 76                                                                                                         |  |  |  |
| -22.3 | CLDN12    | AL136770 | 223249_at   | Claudin 12                                                                                                                                 |  |  |  |
| -22.3 | -         | BE856748 | 227401_at   | Interleukin 17D                                                                                                                            |  |  |  |
| -22.4 | -         | BF062383 | 228244_at   | Biogenesis of lysosomal organelles complex-1, subunit 3                                                                                    |  |  |  |
| -22.5 | -         | AI129346 | 226209_at   | NADH dehydrogenase (ubiquinone) flavoprotein 3, 10kDa                                                                                      |  |  |  |
| -22.5 | -         | AA701890 | 240206_at   | Threonyl-tRNA synthetase                                                                                                                   |  |  |  |
| -22.6 | -         | BC006236 | 224480_s_at | 1-acylglycerol-3-phosphate O-acyltransferase 9                                                                                             |  |  |  |
| -22.6 | -         | AI824976 | 235285_at   | Transcribed locus                                                                                                                          |  |  |  |
| -22.6 | -         | AA875908 | 241917_at   | Transcribed locus                                                                                                                          |  |  |  |
| -22.6 | -         | AI744591 | 227188_at   | Chromosome 21 open reading frame 63                                                                                                        |  |  |  |
| -22.6 | -         | AL038191 | 240271_at   | Transcribed locus                                                                                                                          |  |  |  |
| -22.6 | -         | AW838569 | 235558_at   | RNA binding motif, single stranded interacting protein 2                                                                                   |  |  |  |
| -22.7 | -         | AI375101 | 242507_at   | CDNA FLJ35645 fis, clone SPLEN2012611                                                                                                      |  |  |  |
| -22.7 | -         | BF109387 | 230535_s_at | Transcribed locus                                                                                                                          |  |  |  |
| -23.0 | -         | AI285730 | 230633_at   | Transmembrane protein 102                                                                                                                  |  |  |  |
| -23.0 | -         | AW293422 | 237125_at   | Consensus includes gb:AW293422 /FEA=EST /DB_XREF=gi:6700058 /DB_XREF=est:UI-H-B12-ahm-a-10-0-UI.s1 /CLONE=IMAGE:2727090 /UG=Hs.255199 ESTs |  |  |  |
| -23.1 | -         | AI538546 | 244207_at   | Transcribed locus                                                                                                                          |  |  |  |
| -23.1 | -         | BF513474 | 226918_at   | Junctophilin 4                                                                                                                             |  |  |  |
| -23.1 | -         | AW613053 | 243829_at   | V-raf murine sarcoma viral oncogene homolog B1                                                                                             |  |  |  |
| -23.4 | -         | AI335191 | 244803_at   | Transcribed locus                                                                                                                          |  |  |  |

**Down-Regulated Transcripts (U133A 133B)**

|       |            |          |             |                                                                                                                                                                   |           |       |    |
|-------|------------|----------|-------------|-------------------------------------------------------------------------------------------------------------------------------------------------------------------|-----------|-------|----|
| -23.4 | CWC15      | AF110775 | 223067_at   | CWC15 spliceosome-associated protein homolog ( <i>S. cerevisiae</i> )                                                                                             |           |       |    |
| -23.4 | -          | AW105010 | 235898_at   | Transcribed locus                                                                                                                                                 |           |       |    |
| -23.5 | -          | AW071804 | 242329_at   | CAMP responsive element binding protein 5                                                                                                                         |           |       |    |
| -23.6 | -          | AU158474 | 233350_s_at | Testis expressed 264                                                                                                                                              |           |       |    |
| -23.6 | -          | AI912315 | 236269_at   | Zinc finger protein 628                                                                                                                                           |           |       |    |
| -23.7 | -          | AI351653 | 242904_x_at | Transcribed locus                                                                                                                                                 |           |       |    |
| -23.7 | -          | AI689935 | 236645_at   | HMG-box transcription factor 1                                                                                                                                    |           |       |    |
| -23.8 | -          | AA829836 | 241754_at   | Chromosome 9 open reading frame 126                                                                                                                               |           |       |    |
| -23.8 | -          | AV713062 | 235421_at   | CDNA clone IMAGE:4689481                                                                                                                                          |           |       |    |
| -23.8 | -          | AW629515 | 234988_at   | Valosin containing protein (p97)/p47 complex interacting protein 1                                                                                                |           |       |    |
| -23.8 | -          | AA132172 | 236742_at   | Transcribed locus                                                                                                                                                 |           |       |    |
| -23.9 | -          | AW450033 | 243098_at   | Transcribed locus                                                                                                                                                 |           |       |    |
| -23.9 | -          | BE467023 | 229221_at   | CD44 molecule (Indian blood group)                                                                                                                                |           |       |    |
| -23.9 | RRP12      | AK021460 | 216913_s_at | Ribosomal RNA processing 12 homolog ( <i>S. cerevisiae</i> )                                                                                                      | Hs.434251 | 23223 | 10 |
| -23.9 | -          | AL390159 | 233474_at   | Transcribed locus, strongly similar to XP_001721774.1 PREDICTED: similar to HCG1645807 [Homo sapiens]                                                             |           |       |    |
| -24.1 | WEN_t30492 | T03492   | 238115_at   | Transcribed locus                                                                                                                                                 |           |       |    |
| -24.3 | -          | BF115231 | 225933_at   | Coiled-coil domain containing 137                                                                                                                                 |           |       |    |
| -24.3 | NUDT12     | AL136592 | 223535_at   | Nudix (nucleoside diphosphate linked moiety X)-type motif 12                                                                                                      |           |       |    |
| -24.3 | -          | AK024593 | 225165_at   | Protein phosphatase 1, regulatory (inhibitor) subunit 1B                                                                                                          |           |       |    |
| -24.4 | -          | AK022197 | 233154_at   | CDNA FLJ12135 fis, clone MAMMA1000307                                                                                                                             |           |       |    |
| -24.4 | -          | AI797462 | 229035_s_at | Kelch domain containing 4                                                                                                                                         |           |       |    |
| -24.7 | SYTL4      | AL391688 | 227703_s_at | synaptotagmin-like 4                                                                                                                                              |           |       |    |
| -24.9 | -          | AK022838 | 232511_at   | CDNA FLJ12776 fis, clone NT2RP2001678                                                                                                                             |           |       |    |
| -24.9 | -          | AI813331 | 229097_at   | Diaphanous homolog 3 ( <i>Drosophila</i> )                                                                                                                        |           |       |    |
| -24.9 | VP54       | AL359939 | 233656_s_at | Vacuolar protein sorting 54 homolog ( <i>S. cerevisiae</i> )                                                                                                      |           |       |    |
| -24.9 | -          | N94835   | 232549_at   | RNA binding motif protein 11                                                                                                                                      |           |       |    |
| -25.0 | -          | BF108964 | 228468_at   | Microtubule associated serine/threonine kinase-like                                                                                                               |           |       |    |
| -25.0 | LOC643529  | AL137595 | 232239_at   | HCG2024094                                                                                                                                                        |           |       |    |
| -25.0 | XRN1       | AL117516 | 233632_s_at | 5'-3' exoribonuclease 1                                                                                                                                           |           |       |    |
| -25.1 | -          | BE735175 | 236766_at   | Transcribed locus                                                                                                                                                 |           |       |    |
| -25.2 | -          | AI863675 | 238988_at   | Transcribed locus                                                                                                                                                 |           |       |    |
| -25.2 | RAB23      | AF161486 | 223463_at   | RAB23, member RAS oncogene family                                                                                                                                 |           |       |    |
| -25.2 | -          | AW445213 | 241019_at   | Transcribed locus                                                                                                                                                 |           |       |    |
| -25.3 | -          | AI890591 | 237051_at   | Transcribed locus                                                                                                                                                 |           |       |    |
| -25.4 | -          | AW975772 | 236918_s_at | Leucine rich repeat containing 34                                                                                                                                 |           |       |    |
| -25.4 | -          | AI810497 | 225984_at   | Protein kinase, AMP-activated, alpha 1 catalytic subunit                                                                                                          |           |       |    |
| -25.4 | -          | AW193600 | 232001_at   | Hypothetical gene supported by AY007155                                                                                                                           |           |       |    |
| -25.5 | XYLB       | AA777793 | 214776_x_at | Xylulokinase homolog ( <i>H. influenzae</i> )                                                                                                                     | Hs.659985 | 9942  | 3  |
| -25.5 | G2E3       | BC000973 | 223258_s_at | G2/M-phase specific E3 ubiquitin ligase                                                                                                                           |           |       |    |
| -25.6 | -          | AI928507 | 225388_at   | Tetraspanin 5                                                                                                                                                     |           |       |    |
| -25.7 | -          | AI761584 | 229654_at   | Transcribed locus                                                                                                                                                 |           |       |    |
| -25.7 | -          | AW467480 | 236202_at   | Transcribed locus                                                                                                                                                 |           |       |    |
| -25.8 | -          | AA923524 | 240862_at   | RAS guanyl releasing protein 4                                                                                                                                    |           |       |    |
| -25.9 | -          | AI003777 | 227552_at   | Septin 1                                                                                                                                                          |           |       |    |
| -26.0 | KIAA1377   | AL045516 | 232166_at   | KIAA1377                                                                                                                                                          |           |       |    |
| -26.1 | -          | AA524740 | 225249_at   | Signal peptide peptidase-like 2B                                                                                                                                  |           |       |    |
| -26.1 | -          | AK024380 | 232789_at   | CDNA FLJ14318 fis, clone PLACE3000402                                                                                                                             |           |       |    |
| -26.2 | -          | AI732206 | 238228_at   | Component of oligomeric golgi complex 3                                                                                                                           |           |       |    |
| -26.3 | SAV1       | AJ292969 | 234491_s_at | Salvador homolog 1 ( <i>Drosophila</i> )                                                                                                                          |           |       |    |
| -26.4 | -          | AL034403 | 234372_at   | Human DNA sequence from clone 31B8 on chromosome Xq22.2-23. Contains a GAPD (glyceraldehyde-3-phosphate dehydrogenase pseudogene) pseudogene, ESTs, STSs and GSSs |           |       |    |
| -26.4 | -          | BF512183 | 229885_at   | Transcribed locus                                                                                                                                                 |           |       |    |
| -26.4 | -          | AI401105 | 240118_at   | Transcribed locus                                                                                                                                                 |           |       |    |
| -26.5 | -          | BE348466 | 228802_at   | RNA binding protein with multiple splicing 2                                                                                                                      |           |       |    |
| -26.5 | -          | BF514975 | 242669_at   | Ubiquitin-fold modifier 1                                                                                                                                         |           |       |    |
| -26.6 | -          | AA868356 | 242480_at   | Transcribed locus                                                                                                                                                 |           |       |    |
| -26.7 | -          | AA026388 | 243768_at   | Transcribed locus                                                                                                                                                 |           |       |    |
| -26.7 | -          | AU144437 | 232887_at   | Phosphoinositide-interacting regulator of transient receptor potential channels                                                                                   |           |       |    |
| -26.9 | -          | H12084   | 242292_at   | Chromosome X open reading frame 50B                                                                                                                               |           |       |    |
| -27.0 | -          | AW003313 | 231435_at   | Chromosome 7 open reading frame 34                                                                                                                                |           |       |    |
| -27.0 | -          | BF057084 | 227726_at   | Ring finger protein 166                                                                                                                                           |           |       |    |
| -27.1 | -          | AI239832 | 240383_at   | Ubiquitin-conjugating enzyme E2D 3 (UBC4/5 homolog, yeast)                                                                                                        |           |       |    |
| -27.4 | -          | AA279462 | 237107_at   | Protein kinase, interferon-inducible double stranded RNA dependent activator                                                                                      |           |       |    |

### Down-Regulated Transcripts (U133A 133B)

|       |           |          |             |                                                                                                                                                              |           |      |   |
|-------|-----------|----------|-------------|--------------------------------------------------------------------------------------------------------------------------------------------------------------|-----------|------|---|
| -27.5 | -         | AI307251 | 235704_at   | DAZ associated protein 2                                                                                                                                     |           |      |   |
| -27.6 | -         | AI344332 | 227227_at   | Transcribed locus, strongly similar to XP_001719754.1 PREDICTED: similar to LRRC37A3 protein, partial [Homo sapiens]                                         |           |      |   |
| -27.6 | -         | BE669782 | 244110_at   | Myeloid/lymphoid or mixed-lineage leukemia (trithorax homolog, Drosophila)                                                                                   |           |      |   |
| -27.6 | -         | BF593625 | 226068_at   | Spleen tyrosine kinase                                                                                                                                       |           |      |   |
| -27.7 | -         | AI341321 | 227822_at   | Zinc finger protein 605                                                                                                                                      |           |      |   |
| -28.0 | -         | AI373299 | 226649_at   | Pantothenate kinase 1                                                                                                                                        |           |      |   |
| -28.2 | ACTRT3    | AB049117 | 223665_at   | Actin related protein M1                                                                                                                                     |           |      |   |
| -28.3 | -         | AA281853 | 239505_at   | Transcribed locus                                                                                                                                            |           |      |   |
| -28.3 | DEPDC7    | AJ245600 | 228293_at   | DEP domain containing 7                                                                                                                                      |           |      |   |
| -28.3 | -         | BG034114 | 239627_at   | Transmembrane emp24 protein transport domain containing 9                                                                                                    |           |      |   |
| -28.5 | -         | AI018235 | 240314_at   | Full length insert cDNA clone ZE12G01                                                                                                                        |           |      |   |
| -28.5 | -         | BE965311 | 232269_x_at | Meteorin, glial cell differentiation regulator                                                                                                               |           |      |   |
| -28.5 | -         | AW207642 | 239788_at   | Transcribed locus                                                                                                                                            |           |      |   |
| -28.6 | -         | AA233885 | 244647_at   | Transcribed locus                                                                                                                                            |           |      |   |
| -28.8 | -         | AI703465 | 236023_at   | Cyclin-dependent kinase 9                                                                                                                                    |           |      |   |
| -28.8 | TNFAIP3   | AI738896 | 202643_s_at | Tumor necrosis factor, alpha-induced protein 3                                                                                                               | Hs.211600 | 7128 | 6 |
| -29.0 | -         | BG231554 | 243179_at   | Hypothetical protein LOC100130360                                                                                                                            |           |      |   |
| -29.0 | -         | BE740761 | 232035_at   | Transcribed locus, strongly similar to XP_981474.1 PREDICTED: similar to histone H4 [Mus musculus]                                                           |           |      |   |
| -29.2 | -         | AW292872 | 236198_at   | Consensus includes gb:AW292872 /FEA=EST /DB_XREF=gi:6699508 /DB_XREF=est:UI-H-BW0-aif-f-02-0-UI.s1 /CLONE=IMAGE:2729211 /UG=Hs.124554 ESTs                   |           |      |   |
| -29.3 | -         | BF063382 | 225069_at   | Phosphate cytidyltransferase 1, choline, alpha                                                                                                               |           |      |   |
| -29.4 | -         | BE302305 | 228284_at   | Transducin-like enhancer of split 1 (E(sp1) homolog, Drosophila)                                                                                             |           |      |   |
| -29.4 | -         | AI038577 | 242109_at   | Synaptotagmin-like 3                                                                                                                                         |           |      |   |
| -29.5 | -         | BF938956 | 237096_at   | Transcribed locus                                                                                                                                            |           |      |   |
| -29.5 | -         | AL133091 | 233984_at   | Transcribed locus, strongly similar to NP_766187.1 hypothetical protein LOC218978 [Mus musculus]                                                             |           |      |   |
| -29.6 | -         | AA744843 | 239655_at   | Transcribed locus                                                                                                                                            |           |      |   |
| -29.7 | -         | BE897518 | 241924_at   | Transcribed locus                                                                                                                                            |           |      |   |
| -29.7 | -         | AI023707 | 243435_at   | KCNQ1 overlapping transcript 1 (non-protein coding)                                                                                                          |           |      |   |
| -29.8 | -         | BE886165 | 238502_at   | Transcribed locus                                                                                                                                            |           |      |   |
| -29.9 | -         | AW409794 | 225978_at   | Transcribed locus                                                                                                                                            |           |      |   |
| -30.1 | -         | BE302085 | 239161_at   | Ferredoxin 1                                                                                                                                                 |           |      |   |
| -30.1 | -         | BF913667 | 235055_x_at | Mucin 4, cell surface associated                                                                                                                             |           |      |   |
| -30.2 | -         | AL133564 | 234010_at   | Transcribed locus                                                                                                                                            |           |      |   |
| -30.3 | -         | AA629020 | 233504_at   | Chromosome 9 open reading frame 84                                                                                                                           |           |      |   |
| -30.4 | -         | N25952   | 228926_s_at | SWI/SNF related, matrix associated, actin dependent regulator of chromatin, subfamily a, member 2                                                            |           |      |   |
| -30.6 | ZNF461    | AB021641 | 232391_at   | Zinc finger protein 461                                                                                                                                      |           |      |   |
| -30.6 | ZNF226    | AK023091 | 233461_x_at | Zinc finger protein 226                                                                                                                                      |           |      |   |
| -30.8 | -         | AW003138 | 238207_at   | Similar to CG32736-PA                                                                                                                                        |           |      |   |
| -31.0 | FOSL2     | AA019641 | 241824_at   | Transcribed locus                                                                                                                                            |           |      |   |
| -31.1 | -         | W72315   | 229425_at   | Transcribed locus                                                                                                                                            |           |      |   |
| -31.2 | -         | AI939493 | 241982_at   | Transcribed locus                                                                                                                                            |           |      |   |
| -31.2 | NOXA1     | AI860821 | 232373_at   | NADPH oxidase activator 1                                                                                                                                    |           |      |   |
| -31.3 | OBSCN     | AB046859 | 233029_at   | Obscurin, cytoskeletal calmodulin and titin-interacting RhoGEF                                                                                               |           |      |   |
| -31.3 | -         | BF591611 | 227978_s_at | Zinc binding alcohol dehydrogenase domain containing 2                                                                                                       |           |      |   |
| -31.4 | -         | BE148503 | 241626_at   | Wilms tumor 1 associated protein                                                                                                                             |           |      |   |
| -31.4 | -         | BC006204 | 224471_s_at | Beta-transducin repeat containing                                                                                                                            |           |      |   |
| -31.6 | -         | AW978811 | 242080_at   | Consensus includes gb:AW978811 /FEA=EST /DB_XREF=gi:8170087 /DB_XREF=est:EST390920 /UG=Hs.314451 ESTs, Weakly similar to ALU1_HUMAN ALU SUBFAMILY J SEQUENCE |           |      |   |
| -31.7 | -         | AI821584 | 241080_at   | CONTAMINATION WARNING ENTRY H.sapiens                                                                                                                        |           |      |   |
| -31.7 | -         | AI821584 | 241080_at   | Transcribed locus                                                                                                                                            |           |      |   |
| -31.8 | -         | AA975422 | 242829_x_at | F-box and leucine-rich repeat protein 3                                                                                                                      |           |      |   |
| -32.0 | -         | AW080618 | 226321_at   | LysM, putative peptidoglycan-binding, domain containing 3                                                                                                    |           |      |   |
| -32.2 | -         | BF195118 | 229127_at   | CDNA FLJ31517 fis, clone NT2RI2000007                                                                                                                        |           |      |   |
| -32.3 | -         | AW003222 | 226513_at   | Ankyrin repeat and SOCS box-containing 7                                                                                                                     |           |      |   |
| -32.4 | ANKRD32   | AL136560 | 223542_at   | Ankyrin repeat domain 32                                                                                                                                     |           |      |   |
| -32.7 | PRRT3-AS1 | AI861893 | 242888_at   | Transcribed locus                                                                                                                                            |           |      |   |
| -32.8 | -         | AI630830 | 243150_at   | Transcribed locus                                                                                                                                            |           |      |   |
| -33.1 | GMCL1P1   | AF198534 | 234488_s_at | Germ cell-less homolog 1 (Drosophila)-like                                                                                                                   |           |      |   |
| -33.2 | -         | AI279879 | 230681_at   | Transcribed locus, strongly similar to XP_859029.1 PREDICTED: similar to transforming growth factor beta regulated gene 1 (pr                                |           |      |   |
| -33.3 | -         | AW292830 | 244447_at   | Transcribed locus                                                                                                                                            |           |      |   |

### Down-Regulated Transcripts (U133A 133B)

|       |          |           |             |                                                                                                                            |           |      |    |
|-------|----------|-----------|-------------|----------------------------------------------------------------------------------------------------------------------------|-----------|------|----|
| -33.7 | -        | BF000155  | 242473_at   | TNF receptor-associated factor 4                                                                                           |           |      |    |
| -33.8 | FANCM    | AK001672  | 234733_s_at | Fanconi anemia, complementation group M                                                                                    |           |      |    |
| -33.9 | ANAPC7   | AL137586  | 225521_at   | Anaphase promoting complex subunit 7                                                                                       |           |      |    |
| -33.9 | FBXO4    | AF176703  | 233366_at   | F-box protein 4                                                                                                            |           |      |    |
| -34.0 | -        | AW510927  | 239393_at   | Transcribed locus                                                                                                          |           |      |    |
| -34.1 | DUSP6    | BC005047  | 208893_s_at | Dual specificity phosphatase 6                                                                                             | Hs.298654 | 1848 | 12 |
| -34.1 | -        | AL544576  | 229452_at   | Transmembrane protein 88                                                                                                   |           |      |    |
| -34.4 | -        | AA417099  | 240156_at   | Consensus includes gb:AA417099 /FEA=EST /DB_XREF=gi:2077180 /DB_XREF=est:zu13e02.s1 /CLONE=IMAGE:731738 /UG=Hs.192148 ESTs |           |      |    |
| -34.6 | -        | AI970972  | 235800_at   | CDNA FLJ34029 fis, clone FCBBF2003636                                                                                      |           |      |    |
| -34.9 | -        | AA657818  | 232097_at   | TOX high mobility group box family member 4                                                                                |           |      |    |
| -35.0 | -        | AU119437  | 227289_at   | Protocadherin 17                                                                                                           |           |      |    |
| -35.1 | -        | AA490928  | 238631_at   | Zinc finger protein 140                                                                                                    |           |      |    |
| -35.3 | -        | AK024901  | 234322_at   | CDNA: FLJ21248 fis, clone COL01235                                                                                         |           |      |    |
| -35.4 | -        | AI191591  | 237075_at   | Transcribed locus                                                                                                          |           |      |    |
| -35.4 | -        | BF965447  | 241716_at   | Transcribed locus                                                                                                          |           |      |    |
| -35.4 | -        | AI743151  | 230369_at   | G protein-coupled receptor 161                                                                                             |           |      |    |
| -35.5 | -        | AL117506  | 234434_at   | MRNA; cDNA DKFZp434F0535 (from clone DKFZp434F0535)                                                                        |           |      |    |
| -35.5 | FCRL4    | AF343659  | 224401_s_at | Fc receptor-like 4                                                                                                         |           |      |    |
| -35.5 | C10orf54 | AK024449  | 225372_at   | Chromosome 10 open reading frame 54                                                                                        |           |      |    |
| -35.7 | PRKCZ    | NM_002744 | 202178_at   | Protein kinase C, zeta                                                                                                     | Hs.496255 | 5590 | 1  |
| -35.8 | -        | BE620832  | 224831_at   | Cytoplasmic polyadenylation element binding protein 4                                                                      |           |      |    |
| -35.8 | -        | AI743332  | 242188_at   | Transcribed locus                                                                                                          |           |      |    |
| -35.9 | -        | AA581439  | 244650_at   | family with sequence similarity 105, member A                                                                              |           |      |    |
| -36.0 | -        | AF130085  | 223679_at   | catenin (cadherin-associated protein), beta 1, 88kDa                                                                       |           |      |    |
| -36.1 | -        | AA740875  | 235387_at   | Glutathione S-transferase, C-terminal domain containing                                                                    |           |      |    |
| -36.3 | -        | BE082914  | 243206_at   | Transcribed locus                                                                                                          |           |      |    |
| -36.3 | -        | AU156755  | 226107_at   | CDNA FLJ13495 fis, clone PLACE1004425                                                                                      |           |      |    |
| -36.4 | LOC85648 | AK021551  | 232589_at   | CDNA FLJ11489 fis, clone HEMBA1001915                                                                                      |           |      |    |
| -36.5 | -        | BE349115  | 228873_at   | Collagen, type XXII, alpha 1                                                                                               |           |      |    |
| -36.6 | EGR4     | NM_001965 | 207768_at   | Early growth response 4                                                                                                    | Hs.3052   | 1961 | 2  |
| -36.6 | -        | AI004137  | 242720_at   | Inter-alpha (globulin) inhibitor H4 (plasma Kallikrein-sensitive glycoprotein)                                             |           |      |    |
| -36.7 | -        | AI681419  | 229071_at   | Chromosome 17 open reading frame 100                                                                                       |           |      |    |
| -36.7 | -        | BE674964  | 242143_at   | Transcribed locus                                                                                                          |           |      |    |
| -36.9 | -        | BF197089  | 228670_at   | Telomerase-associated protein 1                                                                                            |           |      |    |
| -36.9 | -        | BF196250  | 244051_at   | Transcribed locus                                                                                                          |           |      |    |
| -37.1 | -        | AI740796  | 240277_at   | Transcribed locus                                                                                                          |           |      |    |
| -37.1 | GADD45B  | NM_015675 | 207574_s_at | Growth arrest and DNA-damage-inducible, beta                                                                               | Hs.110571 | 4616 | 19 |
| -37.1 | -        | BF591040  | 229723_at   | Transcribed locus                                                                                                          |           |      |    |
| -37.1 | -        | AI815001  | 228047_at   | Ribosomal protein L30                                                                                                      |           |      |    |
| -37.4 | IFRD1    | BF061555  | 230048_at   | Transcribed locus                                                                                                          |           |      |    |
| -37.5 | -        | AV733347  | 242905_at   | Partner of NOB1 homolog (S. cerevisiae)                                                                                    |           |      |    |
| -37.5 | -        | BE544070  | 238448_at   | mitochondrial ribosomal protein L19                                                                                        |           |      |    |
| -37.7 | -        | H79861    | 222706_at   | Coiled-coil domain containing 49                                                                                           |           |      |    |
| -37.8 | -        | BF185264  | 237040_at   | CWF19-like 2, cell cycle control (S. pombe)                                                                                |           |      |    |
| -37.8 | -        | N36160    | 241792_x_at | Consensus includes gb:N36160 /FEA=EST /DB_XREF=gi:1157302 /DB_XREF=est:yy29e02.s1 /CLONE=IMAGE:272666 /UG=Hs.32112 ESTs    |           |      |    |
| -37.9 | -        | AI824719  | 242086_at   | CDNA clone IMAGE:4798227                                                                                                   |           |      |    |
| -38.0 | -        | R55286    | 237132_at   | Tight junction protein 2 (zona occludens 2)                                                                                |           |      |    |
| -38.6 | -        | AW269818  | 222908_at   | Family with sequence similarity 38, member B                                                                               |           |      |    |
| -38.7 | -        | BF477980  | 242775_at   | Prostaglandin reductase 1                                                                                                  |           |      |    |
| -38.7 | KIAA1109 | AB037792  | 233096_at   | KIAA1109                                                                                                                   |           |      |    |
| -39.0 | -        | AA775731  | 228857_at   | Hypothetical protein LOC285831                                                                                             |           |      |    |
| -39.1 | FOSB     | NM_006732 | 202768_at   | FBJ murine osteosarcoma viral oncogene homolog B                                                                           | Hs.590958 | 2354 | 19 |
| -39.5 | -        | BF592779  | 229197_at   | Inhibitor of growth family, member 5                                                                                       |           |      |    |
| -39.9 | -        | S69873    | 234907_x_at | Mutant DNA polymerase beta                                                                                                 |           |      |    |
| -40.1 | -        | AA001414  | 225648_at   | Serine/threonine kinase 35                                                                                                 |           |      |    |
| -40.6 | -        | AA150501  | 229011_at   | Transcribed locus                                                                                                          |           |      |    |
| -40.6 | -        | AI308101  | 237400_at   | Transcribed locus                                                                                                          |           |      |    |
| -40.7 | -        | BE564430  | 235093_at   | peroxisomal biogenesis factor 13                                                                                           |           |      |    |
| -40.7 | -        | AI767447  | 225338_at   | Zyg-11 homolog B (C. elegans)                                                                                              |           |      |    |
| -40.7 | -        | AI935789  | 238248_at   | Uromodulin                                                                                                                 |           |      |    |
| -40.8 | -        | AI220157  | 232610_at   | Poly (ADP-ribose) polymerase family, member 14                                                                             |           |      |    |
| -40.8 | CNTNAP4  | AB051550  | 232388_at   | Contactin associated protein-like 4                                                                                        |           |      |    |
| -41.2 | NAA50    | H16725    | 239138_at   | CDNA clone IMAGE:4797099                                                                                                   |           |      |    |



### Down-Regulated Transcripts (U133A 133B)

|       |           |          |             |                                                                                                                             |  |  |  |
|-------|-----------|----------|-------------|-----------------------------------------------------------------------------------------------------------------------------|--|--|--|
| -41.3 | -         | W87626   | 239555_at   | CDNA clone IMAGE:40114646                                                                                                   |  |  |  |
| -41.3 | RPTOR     | AB037724 | 225715_at   | Raptor                                                                                                                      |  |  |  |
| -41.5 | -         | AI479082 | 238127_at   | Hypothetical LOC650669                                                                                                      |  |  |  |
| -41.6 | -         | R34396   | 231902_at   | Zinc finger protein 827                                                                                                     |  |  |  |
| -41.7 | -         | AW169333 | 229804_x_at | COBW domain containing 1                                                                                                    |  |  |  |
| -41.8 | -         | T51136   | 241756_at   | Consensus includes gb:T51136 /FEA=EST /DB_XREF=gi:652996 /DB_XREF=est:yb94b11.s1 /CLONE=IMAGE:78813 /UG=Hs.90489 ESTs       |  |  |  |
| -42.0 | -         | BF110792 | 228818_at   | CDNA FLJ12727 fis, clone NT2RP2000027                                                                                       |  |  |  |
| -42.0 | -         | AW573027 | 244425_at   | Consensus includes gb:AW573027 /FEA=EST /DB_XREF=gi:7237760 /DB_XREF=est:hf30b05.x1 /CLONE=IMAGE:2933361 /UG=Hs.258397 ESTs |  |  |  |
| -42.1 | -         | N32557   | 226907_at   | Protein phosphatase 1, regulatory (inhibitor) subunit 14C                                                                   |  |  |  |
| -42.1 | -         | AI807379 | 231010_at   | Chromosome 4 open reading frame 16                                                                                          |  |  |  |
| -42.6 | -         | AA890362 | 237616_at   | Consensus includes gb:AA890362 /FEA=EST /DB_XREF=gi:3017241 /DB_XREF=est:aj94d06.s1 /CLONE=IMAGE:1404107 /UG=Hs.124170 ESTs |  |  |  |
| -42.8 | -         | AL135700 | 235904_at   | UDP glycosyltransferase 3 family, polypeptide A1                                                                            |  |  |  |
| -43.0 | -         | AI760978 | 243957_at   | Hypothetical protein LOC100128108                                                                                           |  |  |  |
| -43.4 | -         | AW611777 | 240554_at   | A kinase (PRKA) anchor protein 8-like                                                                                       |  |  |  |
| -43.6 | -         | AW963951 | 235334_at   | ST6 (alpha-N-acetyl-neuraminyl-2,3-beta-galactosyl-1,3)-N-acetylgalactosaminide alpha-2,6-sialyltransferase 3               |  |  |  |
| -43.7 | -         | D55880   | 226976_at   | Karyopherin alpha 6 (importin alpha 7)                                                                                      |  |  |  |
| -43.8 | BUB3      | AA218973 | 237245_at   | Transcribed locus                                                                                                           |  |  |  |
| -43.9 | -         | AW085505 | 227198_at   | AF4/FMR2 family, member 3                                                                                                   |  |  |  |
| -44.0 | -         | AI972469 | 242433_at   | Transcribed locus, strongly similar to NP_001100567.1 zinc finger and BTB domain containing 11 [Rattus norvegicus]          |  |  |  |
| -44.1 | -         | AI738675 | 240064_at   | Transcribed locus                                                                                                           |  |  |  |
| -44.2 | -         | BF725250 | 227996_at   | FERM, RhoGEF (ARHGEF) and pleckstrin domain protein 1 (chondrocyte-derived)                                                 |  |  |  |
| -44.4 | -         | AW303359 | 222493_s_at | Zinc finger, AN1-type domain 3                                                                                              |  |  |  |
| -44.8 | PRO1925   | AF116673 | 224214_at   | Transcribed locus                                                                                                           |  |  |  |
| -45.2 | -         | BF109197 | 242577_at   | Transcribed locus                                                                                                           |  |  |  |
| -45.2 | -         | AA810452 | 235885_at   | Transcribed locus, strongly similar to XP_001917763.1 PREDICTED: mediator complex subunit 12-like [Equus caballus]          |  |  |  |
| -45.3 | -         | AI740541 | 231029_at   | Coagulation factor V (proaccelerin, labile factor)                                                                          |  |  |  |
| -45.3 | -         | AI417007 | 243279_at   | Transcribed locus                                                                                                           |  |  |  |
| -45.4 | -         | AI202664 | 233536_at   | Additional sex combs like 3 (Drosophila)                                                                                    |  |  |  |
| -45.6 | -         | N51717   | 235146_at   | Transmembrane and coiled-coil domain family 3                                                                               |  |  |  |
| -45.8 | -         | AI953022 | 236460_at   | Transcribed locus                                                                                                           |  |  |  |
| -45.9 | -         | N67108   | 230837_at   | Transcribed locus                                                                                                           |  |  |  |
| -46.1 | -         | AA262228 | 243923_at   | Transcribed locus                                                                                                           |  |  |  |
| -46.3 | -         | AW005640 | 229781_at   | Transcribed locus                                                                                                           |  |  |  |
| -46.5 | -         | AW204095 | 236090_at   | Transcribed locus                                                                                                           |  |  |  |
| -47.0 | -         | AL561281 | 222547_at   | Transcribed locus                                                                                                           |  |  |  |
| -47.6 | MBNL1-AS1 | AK026494 | 232298_at   | Hypothetical LOC401093                                                                                                      |  |  |  |
| -47.8 | -         | BE880820 | 225584_at   | Tripartite motif-containing 26                                                                                              |  |  |  |
| -48.3 | -         | AA765786 | 243293_at   | Transcribed locus                                                                                                           |  |  |  |
| -48.3 | -         | BF690134 | 238331_at   | Shadow of prion protein homolog (zebrafish)                                                                                 |  |  |  |
| -48.4 | ARMC2     | AL136754 | 223866_at   | Armadillo repeat containing 2                                                                                               |  |  |  |
| -48.4 | -         | AW205659 | 229604_at   | Cytidine monophosphate-N-acetylneuraminic acid hydroxylase (CMP-N-acetylneuraminase pseudogene)                             |  |  |  |
| -48.9 | -         | AW117206 | 239402_at   | Transcribed locus                                                                                                           |  |  |  |
| -49.1 | MICAL3    | AB037785 | 231985_at   | Microtubule associated monooxygenase, calponin and LIM domain containing 3                                                  |  |  |  |
| -49.2 | EMILIN2   | AL552384 | 242288_s_at | Elastin microfibril interfacer 2                                                                                            |  |  |  |
| -49.8 | -         | AW195407 | 227341_at   | BEN domain containing 7                                                                                                     |  |  |  |
| -50.3 | -         | AA429262 | 235920_at   | CDNA clone IMAGE:4779711                                                                                                    |  |  |  |
| -50.8 | -         | BE380045 | 243026_x_at | X-linked inhibitor of apoptosis                                                                                             |  |  |  |
| -51.0 | SMG9      | AL136606 | 223188_at   | Chromosome 19 open reading frame 61                                                                                         |  |  |  |
| -51.5 | -         | BF878343 | 235204_at   | COX15 homolog, cytochrome c oxidase assembly protein (yeast)                                                                |  |  |  |
| -51.6 | -         | BF063821 | 230598_at   | Transcribed locus                                                                                                           |  |  |  |
| -51.7 | -         | AW172914 | 243661_at   | Zinc finger protein 273                                                                                                     |  |  |  |
| -51.8 | -         | BE964704 | 228164_at   | adaptor-related protein complex 4, epsilon 1 subunit                                                                        |  |  |  |
| -51.9 | -         | AU156202 | 233473_x_at | CDNA FLJ13434 fis, clone PLACE1002578                                                                                       |  |  |  |
| -52.2 | -         | BF840360 | 239404_at   | Transcribed locus                                                                                                           |  |  |  |
| -52.4 | -         | AV729072 | 226301_at   | Chromosome 6 open reading frame 192                                                                                         |  |  |  |
| -52.4 | KIF13A    | AY014403 | 223520_s_at | Kinesin family member 13A                                                                                                   |  |  |  |

**Down-Regulated Transcripts (U133A 133B)**

|       |           |          |             |                                                                                                                                                                                                                             |  |  |  |
|-------|-----------|----------|-------------|-----------------------------------------------------------------------------------------------------------------------------------------------------------------------------------------------------------------------------|--|--|--|
| -52.5 | -         | AA677700 | 241688_at   | Consensus includes gb:AA677700 /FEA=EST /DB_XREF=gi:2658222 /DB_XREF=est:zj72h05.s1 /CLONE=IMAGE:460473 /UG=Hs.269600 ESTs, Weakly similar to S72482 hypothetical protein H.sapiens                                         |  |  |  |
| -52.8 | -         | AA491949 | 241897_at   | Consensus includes gb:AA491949 /FEA=EST /DB_XREF=gi:2221511 /DB_XREF=est:ng16g01.s1 /CLONE=IMAGE:929616 /UG=Hs.269392 ESTs                                                                                                  |  |  |  |
| -52.9 | -         | AA913885 | 239795_at   | Transcribed locus                                                                                                                                                                                                           |  |  |  |
| -53.4 | -         | AA968473 | 243458_at   | Consensus includes gb:AA968473 /FEA=EST /DB_XREF=gi:3143653 /DB_XREF=est:op49f05.s1 /CLONE=IMAGE:1580193 /UG=Hs.212644 ESTs                                                                                                 |  |  |  |
| -53.7 | -         | AI377875 | 236700_at   | eukaryotic translation initiation factor 3, subunit C                                                                                                                                                                       |  |  |  |
| -54.0 | LINC00626 | BC001841 | 224020_at   | Hypothetical LOC79100                                                                                                                                                                                                       |  |  |  |
| -54.3 | -         | BF690215 | 240428_at   | Hypothetical protein LOC285000                                                                                                                                                                                              |  |  |  |
| -54.5 | -         | AU144005 | 232797_at   | CDNA FLJ11397 fis, clone HEMBA1000622                                                                                                                                                                                       |  |  |  |
| -55.0 | -         | BF939224 | 239092_at   | Integrin, alpha 8                                                                                                                                                                                                           |  |  |  |
| -55.3 | -         | AW450288 | 237671_at   | Transcribed locus                                                                                                                                                                                                           |  |  |  |
| -55.4 | -         | AW104936 | 240708_at   | Transcribed locus                                                                                                                                                                                                           |  |  |  |
| -55.5 | -         | BE552208 | 229359_at   | Transcribed locus                                                                                                                                                                                                           |  |  |  |
| -55.6 | -         | AI906424 | 238610_s_at | Transcribed locus                                                                                                                                                                                                           |  |  |  |
| -55.7 | -         | AW008270 | 242549_at   | Protein kinase D3                                                                                                                                                                                                           |  |  |  |
| -55.8 | -         | AI355848 | 227400_at   | nuclear factor I/X (CCAAT-binding transcription factor)                                                                                                                                                                     |  |  |  |
| -55.8 | -         | AI652926 | 237546_at   | Transcribed locus                                                                                                                                                                                                           |  |  |  |
| -55.9 | -         | AI057455 | 244010_at   | MRNA; cDNA DKFZp686J08131 (from clone DKFZp686J08131)                                                                                                                                                                       |  |  |  |
| -55.9 | -         | AI458949 | 242903_at   | Interferon gamma receptor 1                                                                                                                                                                                                 |  |  |  |
| -56.1 | -         | BF514271 | 242591_at   | Dynein, axonemal, heavy chain 1                                                                                                                                                                                             |  |  |  |
| -56.2 | AI61      | AK001347 | 232810_at   | Androgen-induced 1                                                                                                                                                                                                          |  |  |  |
| -56.7 | -         | AI950023 | 244433_at   | Consensus includes gb:AI950023 /FEA=EST /DB_XREF=gi:5742333 /DB_XREF=est:wq15g03.x1 /CLONE=IMAGE:2471380 /UG=Hs.270751 ESTs                                                                                                 |  |  |  |
| -56.8 | -         | AK024979 | 232852_at   | CDNA: FLJ21326 fis, clone COL02445                                                                                                                                                                                          |  |  |  |
| -57.0 | -         | AI672386 | 236936_at   | Consensus includes gb:AI672386 /FEA=EST /DB_XREF=gi:4852117 /DB_XREF=est:ty64e11.x1 /CLONE=IMAGE:2283884 /UG=Hs.263780 ESTs                                                                                                 |  |  |  |
| -58.2 | -         | AI160083 | 240388_at   | Keratin 27                                                                                                                                                                                                                  |  |  |  |
| -58.5 | -         | AI935766 | 229054_at   | Chromosome 14 open reading frame 181                                                                                                                                                                                        |  |  |  |
| -58.8 | -         | W80594   | 237747_at   | CDNA FLJ26998 fis, clone SLV04689                                                                                                                                                                                           |  |  |  |
| -59.0 | -         | AU154942 | 232929_at   | CDNA FLJ13240 fis, clone OVARC1000496                                                                                                                                                                                       |  |  |  |
| -59.9 | -         | AI733356 | 239688_at   | Structural maintenance of chromosomes 1A                                                                                                                                                                                    |  |  |  |
| -60.4 | -         | T98846   | 239654_at   | Chromodomain helicase DNA binding protein 9                                                                                                                                                                                 |  |  |  |
| -60.5 | -         | AA417971 | 230572_at   | Chromosome 4 open reading frame 38                                                                                                                                                                                          |  |  |  |
| -60.6 | -         | AI139639 | 236662_at   | Transcribed locus                                                                                                                                                                                                           |  |  |  |
| -60.7 | -         | BE501712 | 229659_s_at | Polymeric immunoglobulin receptor                                                                                                                                                                                           |  |  |  |
| -60.8 | -         | AW339783 | 240631_at   | G protein-coupled receptor 98                                                                                                                                                                                               |  |  |  |
| -60.9 | -         | AI823453 | 243589_at   | KIAA1267                                                                                                                                                                                                                    |  |  |  |
| -60.9 | -         | AU151788 | 232230_at   | Chromosome 10 open reading frame 75                                                                                                                                                                                         |  |  |  |
| -61.1 | -         | AA609053 | 227803_at   | Ectonucleotide pyrophosphatase/phosphodiesterase 5 (putative function)                                                                                                                                                      |  |  |  |
| -61.4 | FLJ21394  | AK025047 | 234785_at   | Homo sapiens cDNA: FLJ21394 fis, clone COL03536.                                                                                                                                                                            |  |  |  |
| -62.0 | -         | BG236289 | 228759_at   | CAMP responsive element binding protein 3-like 2                                                                                                                                                                            |  |  |  |
| -62.2 | -         | N54957   | 228042_at   | ADP-ribosylarginine hydrolase                                                                                                                                                                                               |  |  |  |
| -63.1 | -         | AF116638 | 224098_at   | Homo sapiens PRO1546 mRNA, complete cds.                                                                                                                                                                                    |  |  |  |
| -63.5 | -         | AI281371 | 243792_x_at | Protein tyrosine phosphatase, non-receptor type 13 (APO-1/CD95 (Fas)-associated phosphatase)                                                                                                                                |  |  |  |
| -63.6 | -         | AW972669 | 242106_at   | Transcribed locus                                                                                                                                                                                                           |  |  |  |
| -64.9 | -         | AI203405 | 240409_at   | SGT1, suppressor of G2 allele of SKP1 like 1 (S. cerevisiae)                                                                                                                                                                |  |  |  |
| -65.1 | -         | AV705309 | 236278_at   | Transcribed locus, strongly similar to NP_724345.1 histone H3 [Drosophila melanogaster]                                                                                                                                     |  |  |  |
| -65.2 | FOXP1     | BC005055 | 223937_at   | Forkhead box P1                                                                                                                                                                                                             |  |  |  |
| -65.3 | -         | BF059479 | 239552_at   | Transcribed locus, strongly similar to XP_374405.6 PREDICTED: hypothetical protein LOC221806 [Homo sapiens]                                                                                                                 |  |  |  |
| -65.5 | -         | AI056238 | 240468_at   | Transcribed locus                                                                                                                                                                                                           |  |  |  |
| -65.5 | -         | AW242668 | 230889_at   | Transcribed locus, strongly similar to XP_001714597.1 PREDICTED: hypothetical protein [Homo sapiens]                                                                                                                        |  |  |  |
| -65.5 | -         | AA609250 | 240330_at   | Transcribed locus                                                                                                                                                                                                           |  |  |  |
| -66.1 | -         | BF691634 | 243840_at   | Consensus includes gb:BF691634 /FEA=EST /DB_XREF=gi:11977135 /DB_XREF=est:602248362F1 /CLONE=IMAGE:4333599 /UG=Hs.226414 ESTs, Weakly similar to ALU8_HUMAN ALU SUBFAMILY SX SEQUENCE CONTAMINATION WARNING ENTRY H.sapiens |  |  |  |
| -66.2 | -         | AI681868 | 236495_at   | Transcribed locus                                                                                                                                                                                                           |  |  |  |
| -66.7 | -         | AI139114 | 239918_at   | Poliovirus receptor                                                                                                                                                                                                         |  |  |  |

**Down-Regulated Transcripts (U133A 133B)**

|       |        |          |             |                                                                                                                                                                                                                          |  |  |  |
|-------|--------|----------|-------------|--------------------------------------------------------------------------------------------------------------------------------------------------------------------------------------------------------------------------|--|--|--|
| -67.2 | -      | AI273692 | 243510_at   | Transcribed locus                                                                                                                                                                                                        |  |  |  |
|       |        |          |             | Consensus includes gb:A1821404 /FEA=EST /DB_XREF=gi:5440483 /DB_XREF=est:ye17h09.x5 /CLONE=IMAGE:118049 /UG=Hs.227505 ESTs, Weakly similar to ALU7_HUMAN ALU SUBFAMILY SQ SEQUENCE CONTAMINATION WARNING ENTRY H.sapiens |  |  |  |
| -67.3 | -      | AI821404 | 237496_at   |                                                                                                                                                                                                                          |  |  |  |
| -67.9 | -      | BG290819 | 226010_at   | Solute carrier family 25 (mitochondrial carrier; phosphate carrier), member 23                                                                                                                                           |  |  |  |
| -67.9 | -      | AK026079 | 234644_x_at | Tumor necrosis factor receptor superfamily, member 10c, decoy without an intracellular domain                                                                                                                            |  |  |  |
| -68.2 | -      | AA992936 | 238501_at   | Transcribed locus                                                                                                                                                                                                        |  |  |  |
| -69.0 | -      | BE858032 | 228201_at   | ADP-ribosylation factor-like 13B                                                                                                                                                                                         |  |  |  |
| -69.1 | -      | AW009638 | 228596_at   | Rho guanine nucleotide exchange factor (GEF) 5                                                                                                                                                                           |  |  |  |
| -69.9 | -      | AW449589 | 237525_at   | Consensus includes gb:AW449589 /FEA=EST /DB_XREF=gi:6990295 /DB_XREF=est:UI-H-B13-aku-f-01-0-UI.s1 /CLONE=IMAGE:2735736 /UG=Hs.279724 ESTs                                                                               |  |  |  |
| -69.9 | -      | AI017875 | 240867_at   | Transcribed locus                                                                                                                                                                                                        |  |  |  |
| -70.7 | -      | AI268315 | 227027_at   | Glutamine-fructose-6-phosphate transaminase 1                                                                                                                                                                            |  |  |  |
| -71.1 | -      | BG236366 | 227645_at   | Phosphoinositide-3-kinase, regulatory subunit 5                                                                                                                                                                          |  |  |  |
| -71.2 | -      | AW665665 | 237187_at   | Transcribed locus                                                                                                                                                                                                        |  |  |  |
| -71.5 | -      | BE672379 | 237583_at   | Consensus includes gb:BE672379 /FEA=EST /DB_XREF=gi:10032920 /DB_XREF=est:7a56h12.x1 /CLONE=IMAGE:3222791 /UG=Hs.156825 ESTs                                                                                             |  |  |  |
| -71.9 | -      | AA601031 | 228919_at   | Transcribed locus                                                                                                                                                                                                        |  |  |  |
| -72.2 | -      | AI733824 | 243304_at   | Hypothetical protein LOC286109                                                                                                                                                                                           |  |  |  |
| -72.6 | -      | AI377007 | 241398_at   | Metallophosphoesterase domain containing 1                                                                                                                                                                               |  |  |  |
| -73.2 | -      | AI806500 | 222667_s_at | Ash1 (absent, small, or homeotic)-like (Drosophila)                                                                                                                                                                      |  |  |  |
| -74.2 | -      | AU149021 | 233005_at   | CDNA FLJ12602 fis, clone NT2RM4001437                                                                                                                                                                                    |  |  |  |
| -74.3 | -      | N90377   | 243031_at   | Transcribed locus                                                                                                                                                                                                        |  |  |  |
| -74.6 | -      | T86874   | 230607_at   | Transcribed locus                                                                                                                                                                                                        |  |  |  |
| -74.9 | ZNF607 | BC005085 | 223680_at   | Zinc finger protein 607                                                                                                                                                                                                  |  |  |  |
| -75.1 | ZNF451 | AB051489 | 231885_at   | Zinc finger protein 451                                                                                                                                                                                                  |  |  |  |
| -75.5 | -      | AA677952 | 237318_at   | Transcribed locus                                                                                                                                                                                                        |  |  |  |
| -75.7 | -      | BF063657 | 244026_at   | Transcribed locus                                                                                                                                                                                                        |  |  |  |
| -76.4 | -      | AV648669 | 241812_at   | viral DNA polymerase-transactivated protein 6                                                                                                                                                                            |  |  |  |
| -76.6 | -      | AI884906 | 230720_at   | Ring finger protein 182                                                                                                                                                                                                  |  |  |  |
| -76.6 | -      | AA459699 | 240456_at   | Transcribed locus                                                                                                                                                                                                        |  |  |  |
| -76.9 | -      | N51107   | 242632_at   | FYVE, RhoGEF and PH domain containing 2                                                                                                                                                                                  |  |  |  |
| -77.0 | -      | AA131302 | 236032_at   | Transcribed locus                                                                                                                                                                                                        |  |  |  |
| -77.1 | -      | BE676062 | 231249_at   | Transcribed locus, strongly similar to NP_036437.1 adaptor-related protein complex 2, alpha 2 subunit [Homo sapiens]                                                                                                     |  |  |  |
| -77.2 | -      | AA731746 | 236582_at   | Transcribed locus                                                                                                                                                                                                        |  |  |  |
| -77.7 | ELP2   | AK022709 | 232503_at   | Elongation protein 2 homolog (S. cerevisiae)                                                                                                                                                                             |  |  |  |
| -78.2 | FNBP1  | AA262084 | 239453_at   | Transcribed locus                                                                                                                                                                                                        |  |  |  |
| -78.4 | -      | AI765006 | 235775_at   | Transmembrane and tetratricopeptide repeat containing 2                                                                                                                                                                  |  |  |  |
| -79.0 | -      | AA678985 | 238966_at   | bruno-like 4, RNA binding protein (Drosophila)                                                                                                                                                                           |  |  |  |
| -79.8 | RUFY2  | AB040970 | 233192_s_at | RUN and FYVE domain containing 2                                                                                                                                                                                         |  |  |  |
| -80.2 | -      | AK022100 | 233406_at   | CDNA FLJ12038 fis, clone HEMBB1001922                                                                                                                                                                                    |  |  |  |
| -80.2 | -      | R53820   | 227519_at   | Placenta-specific 4                                                                                                                                                                                                      |  |  |  |
| -80.7 | -      | BE551407 | 239258_at   | Transcribed locus                                                                                                                                                                                                        |  |  |  |
| -80.7 | -      | BF514509 | 239049_at   | Consensus includes gb:BF514509 /FEA=EST /DB_XREF=gi:11599688 /DB_XREF=est:UI-H-BW1-anf-g-03-0-UI.s1 /CLONE=IMAGE:3082180 /UG=Hs.262571 ESTs                                                                              |  |  |  |
| -81.0 | -      | AI694413 | 235229_at   | Consensus includes gb:AI694413 /FEA=EST /DB_XREF=gi:4971753 /DB_XREF=est:wd83d12.x1 /CLONE=IMAGE:2338199 /UG=Hs.332649 olfactory receptor, family 2, subfamily I, member 6                                               |  |  |  |
| -81.2 | -      | AA917932 | 244179_x_at | Gamma-glutamyltransferase 3 pseudogene                                                                                                                                                                                   |  |  |  |
| -81.3 | -      | N66727   | 235424_at   | Transcribed locus                                                                                                                                                                                                        |  |  |  |
| -81.3 | -      | AI867408 | 235816_s_at | Ral guanine nucleotide dissociation stimulator-like 4                                                                                                                                                                    |  |  |  |
| -82.4 | -      | AA131694 | 227222_at   | F-box protein 10                                                                                                                                                                                                         |  |  |  |
| -82.4 | -      | C18965   | 242853_at   | Transcribed locus                                                                                                                                                                                                        |  |  |  |
| -82.6 | -      | BF111088 | 240797_at   | PERP, TP53 apoptosis effector                                                                                                                                                                                            |  |  |  |
| -83.0 | -      | AA521136 | 239504_at   | Consensus includes gb:AA521136 /FEA=EST /DB_XREF=gi:2261679 /DB_XREF=est:aa73a03.s1 /CLONE=IMAGE:826540 /UG=Hs.190176 ESTs                                                                                               |  |  |  |
| -83.3 | -      | AW971123 | 236446_at   | Transcribed locus                                                                                                                                                                                                        |  |  |  |
| -83.6 | -      | AA813336 | 240371_at   | Similar to hCG2021878                                                                                                                                                                                                    |  |  |  |
| -85.5 | -      | AK024153 | 233515_at   | CDNA FLJ36506 fis, clone TRACH2001060                                                                                                                                                                                    |  |  |  |
| -85.5 | ZNRF3  | AL021393 | 234843_s_at | zinc and ring finger 3                                                                                                                                                                                                   |  |  |  |
| -86.0 | -      | AI700446 | 229738_at   | Dynein, axonemal, heavy chain 10                                                                                                                                                                                         |  |  |  |
| -86.4 | -      | AW089307 | 235057_at   | Itchy E3 ubiquitin protein ligase homolog (mouse)                                                                                                                                                                        |  |  |  |

**Down-Regulated Transcripts (U133A 133B)**

|        |          |          |             |                                                                                                                                                                                                                           |  |  |  |
|--------|----------|----------|-------------|---------------------------------------------------------------------------------------------------------------------------------------------------------------------------------------------------------------------------|--|--|--|
| -87.1  | -        | R47946   | 241536_at   | Full length insert cDNA YO61A08                                                                                                                                                                                           |  |  |  |
| -87.2  | -        | AU148054 | 233106_at   | Chromosome 14 open reading frame 82                                                                                                                                                                                       |  |  |  |
| -87.2  | -        | AI654208 | 244702_at   | Transcribed locus                                                                                                                                                                                                         |  |  |  |
| -89.2  | -        | AA708470 | 239988_at   | Transcribed locus                                                                                                                                                                                                         |  |  |  |
| -89.7  | -        | BF433010 | 229165_at   | Mitochondrial ribosomal protein L12                                                                                                                                                                                       |  |  |  |
| -89.8  | TCP11L1  | AK021448 | 233472_at   | t-complex 11 (mouse)-like 1                                                                                                                                                                                               |  |  |  |
| -90.9  | TMEFF2   | AB017269 | 223557_s_at | Transmembrane protein with EGF-like and two follistatin-like domains 2                                                                                                                                                    |  |  |  |
| -91.0  | -        | AI678013 | 240165_at   | Transcribed locus                                                                                                                                                                                                         |  |  |  |
| -91.2  | -        | AI631210 | 226873_at   | CDNA clone IMAGE:4794011                                                                                                                                                                                                  |  |  |  |
| -91.2  | -        | AF148949 | 232827_at   | Clone L50 polyadenylated HERV LTR sequence and flanking cellular sequence, mRNA                                                                                                                                           |  |  |  |
| -93.8  | -        | AA176289 | 227496_at   | Hypothetical protein LOC253842                                                                                                                                                                                            |  |  |  |
| -93.9  | -        | AW593060 | 243657_at   | Transcribed locus                                                                                                                                                                                                         |  |  |  |
| -93.9  | -        | T53175   | 238609_at   | chromosome 7 open reading frame 38                                                                                                                                                                                        |  |  |  |
| -94.2  | -        | AW206099 | 240171_at   | Transcribed locus                                                                                                                                                                                                         |  |  |  |
| -94.6  | -        | AI274308 | 242773_at   | Solute carrier family 5 (sodium/glucose cotransporter), member 1                                                                                                                                                          |  |  |  |
| -95.3  | -        | H15073   | 236685_at   | Transcribed locus                                                                                                                                                                                                         |  |  |  |
| -95.7  | -        | AW450381 | 237305_at   | Transcribed locus                                                                                                                                                                                                         |  |  |  |
| -96.1  | SEMA4B   | AK026133 | 234725_s_at | Sema domain, immunoglobulin domain (Ig), transmembrane domain (TM) and short cytoplasmic domain, (semaphorin) 4B                                                                                                          |  |  |  |
| -97.8  | -        | AI349737 | 241675_s_at | Consensus includes gb:AI349737 /FEA=EST /DB_XREF=gi:4086943 /DB_XREF=est:ta96a12.x1 /CLONE=IMAGE:2051902 /UG=Hs.217834 ESTs                                                                                               |  |  |  |
| -99.4  | -        | AW167424 | 236930_at   | Numb homolog (Drosophila)                                                                                                                                                                                                 |  |  |  |
| -101.4 | -        | AU146893 | 229858_at   | CDNA FLJ12024 fis, clone HEMBB1001797                                                                                                                                                                                     |  |  |  |
| -103.9 | -        | BE463997 | 229062_at   | ADP-ribosylation factor-like 9                                                                                                                                                                                            |  |  |  |
| -107.0 | -        | H28597   | 227578_at   | Hypothetical protein LOC100128191                                                                                                                                                                                         |  |  |  |
| -108.7 | -        | AI283051 | 244383_at   | CDNA clone IMAGE:5175565                                                                                                                                                                                                  |  |  |  |
| -109.8 | -        | AI417756 | 243364_at   | Transcribed locus, strongly similar to NP_796021.2 autism susceptibility candidate 2 [Mus musculus]                                                                                                                       |  |  |  |
| -110.4 | -        | AW663570 | 243389_at   | Proline rich 4 (lacrima)                                                                                                                                                                                                  |  |  |  |
| -113.9 | -        | AW136975 | 240545_at   | Transcribed locus                                                                                                                                                                                                         |  |  |  |
| -114.1 | -        | AA765470 | 236160_at   | Transcribed locus                                                                                                                                                                                                         |  |  |  |
| -117.4 | -        | AI911084 | 236889_at   | Transcribed locus                                                                                                                                                                                                         |  |  |  |
| -118.3 | -        | AA002211 | 239357_at   | ATPase, Ca++ transporting, plasma membrane 2                                                                                                                                                                              |  |  |  |
| -119.1 | -        | BE673651 | 241890_at   | Transcribed locus                                                                                                                                                                                                         |  |  |  |
| -120.3 | -        | AI280328 | 239721_at   | Consensus includes gb:AI280328 /FEA=EST /DB_XREF=gi:3918561 /DB_XREF=est:qm68f10.x1 /CLONE=IMAGE:1893931 /UG=Hs.119275 ESTs                                                                                               |  |  |  |
| -124.7 | -        | AA873729 | 243658_at   | Consensus includes gb:AA873729 /FEA=EST /DB_XREF=gi:2969851 /DB_XREF=est:oh55h01.s1 /CLONE=IMAGE:1470577 /UG=Hs.269365 ESTs, Weakly similar to ALU8_HUMAN ALU SUBFAMILY SX SEQUENCE CONTAMINATION WARNING ENTRY H.sapiens |  |  |  |
| -124.7 | -        | AW953794 | 230968_at   | Transcribed locus                                                                                                                                                                                                         |  |  |  |
| -125.7 | -        | H72752   | 234117_at   | Asthma-associated alternatively spliced gene 1                                                                                                                                                                            |  |  |  |
| -126.3 | C20orf57 | AK000652 | 234829_at   | Chromosome 20 open reading frame 57                                                                                                                                                                                       |  |  |  |
| -127.1 | -        | AI066520 | 231385_at   | Developmental pluripotency associated 3                                                                                                                                                                                   |  |  |  |
| -132.6 | -        | BE500990 | 237710_at   | Transcribed locus                                                                                                                                                                                                         |  |  |  |
| -135.0 | -        | AI184197 | 237391_at   | Transcribed locus                                                                                                                                                                                                         |  |  |  |
| -137.5 | -        | AI082692 | 242009_at   | Solute carrier family 6 (neurotransmitter transporter, serotonin), member 4                                                                                                                                               |  |  |  |
| -143.8 | -        | AI745254 | 230348_at   | Transcribed locus                                                                                                                                                                                                         |  |  |  |
| -144.2 | -        | AU144570 | 232576_at   | CDNA FLJ11519 fis, clone HEMBA1002348                                                                                                                                                                                     |  |  |  |
| -145.3 | -        | AL117627 | 233074_at   | MRNA; cDNA DKFZp434B115 (from clone DKFZp434B115)                                                                                                                                                                         |  |  |  |
| -146.5 | -        | AW340891 | 242854_x_at | Deleted in lymphocytic leukemia 2 (non-protein coding)                                                                                                                                                                    |  |  |  |
| -149.2 | -        | BE139246 | 229979_x_at | Transcribed locus                                                                                                                                                                                                         |  |  |  |
| -149.9 | -        | AI954654 | 241748_x_at | DiGeorge syndrome critical region gene 14                                                                                                                                                                                 |  |  |  |
| -160.0 | -        | AI872645 | 243938_x_at | Dynein, axonemal, heavy chain 5                                                                                                                                                                                           |  |  |  |
| -162.0 | TTC26    | AL137393 | 233999_s_at | Tetratricopeptide repeat domain 26                                                                                                                                                                                        |  |  |  |
| -164.5 | -        | AU146329 | 243819_at   | Consensus includes gb:AU146329 /FEA=EST /DB_XREF=gi:11007850 /DB_XREF=est:AU146329 /CLONE=HEMBA1000166 /UG=Hs.187772 ESTs                                                                                                 |  |  |  |
| -167.1 | -        | AA522888 | 225085_at   | Ubiquitin specific peptidase 40                                                                                                                                                                                           |  |  |  |
| -167.6 | -        | AW612663 | 236568_at   | Transcribed locus                                                                                                                                                                                                         |  |  |  |
| -170.2 | -        | AW298102 | 236014_at   | Mohawk homeobox                                                                                                                                                                                                           |  |  |  |
| -171.6 | -        | AI820961 | 240331_at   | Transcribed locus                                                                                                                                                                                                         |  |  |  |
| -173.4 | -        | BF064231 | 240670_at   | Transcribed locus                                                                                                                                                                                                         |  |  |  |
| -175.9 | -        | BE274992 | 239704_at   | Ring finger protein 144B                                                                                                                                                                                                  |  |  |  |
| -178.3 | -        | AW593244 | 226342_at   | Spectrin, beta, non-erythrocytic 1                                                                                                                                                                                        |  |  |  |

**Down-Regulated Transcripts (U133A 133B)**

|         |           |             |                |                                                                                                                                                                                                                                            |  |  |  |
|---------|-----------|-------------|----------------|--------------------------------------------------------------------------------------------------------------------------------------------------------------------------------------------------------------------------------------------|--|--|--|
| -178.7  | PPHLN1    | AK000186    | 234459_at      | periphilin 1                                                                                                                                                                                                                               |  |  |  |
| -184.9  | -         | AA461080    | 244689_at      | peroxisome proliferator-activated receptor alpha                                                                                                                                                                                           |  |  |  |
| -185.2  | -         | AI028267    | 231356_at      | Similar to hCG2045213                                                                                                                                                                                                                      |  |  |  |
| -187.7  | HIF3A     | AK021421    | 233517_s_at    | Hypoxia inducible factor 3, alpha subunit                                                                                                                                                                                                  |  |  |  |
| -187.8  | -         | N78412      | 242899_at      | CDNA FLJ33813 fis, clone CTONG2002744                                                                                                                                                                                                      |  |  |  |
| -188.0  | -         | AK000839    | 232979_at      | CDNA FLJ20832 fis, clone ADKA03033                                                                                                                                                                                                         |  |  |  |
| -188.4  | -         | AL133399    | 234784_at      | Human DNA sequence from clone RP1-305G21 on chromosome 11p13 Contains a pseudogene similar to S100C, STSs and GSSs                                                                                                                         |  |  |  |
| -192.2  | -         | AI640307    | 228635_at      | Protocadherin 10                                                                                                                                                                                                                           |  |  |  |
| -193.1  | -         | AW340093    | 243921_at      | Transcribed locus                                                                                                                                                                                                                          |  |  |  |
| -196.9  | -         | BG252802    | 229641_at      | Consensus includes gb:BG252802 /FEA=EST /DB_XREF=gi:12762618 /DB_XREF=est:602365370F1 /CLONE=IMAGE:4473737 /UG=Hs.49943 ESTs                                                                                                               |  |  |  |
| -202.0  | MYEOV     | AK026148    | 227343_at      | Myeloma overexpressed (in a subset of t(11;14) positive multiple myelomas)                                                                                                                                                                 |  |  |  |
| -205.9  | -         | BE048571    | 228235_at      | Non-steroidal anti-inflammatory drug activated gene 3 mRNA, partial sequence                                                                                                                                                               |  |  |  |
| -208.0  | -         | AI379514    | 230828_at      | Transcribed locus                                                                                                                                                                                                                          |  |  |  |
| -209.0  | -         | AW084511    | 226622_at      | Mucin 20, cell surface associated                                                                                                                                                                                                          |  |  |  |
| -217.3  | -         | BF511694    | 237471_at      | Hypothetical LOC154822                                                                                                                                                                                                                     |  |  |  |
| -218.8  | -         | AA809487    | 231042_s_at    | Transcribed locus                                                                                                                                                                                                                          |  |  |  |
| -221.4  | -         | BE825318    | 244347_at      | Transcribed locus                                                                                                                                                                                                                          |  |  |  |
| -223.9  | -         | BF513468    | 241505_at      | Transcribed locus                                                                                                                                                                                                                          |  |  |  |
| -234.8  | IFI27L2   | AF208232    | 223626_x_at    | Interferon, alpha-inducible protein 27-like 2                                                                                                                                                                                              |  |  |  |
| -241.1  | -         | AK026713    | 234663_at      | CDNA: FLJ23060 fis, clone LNG04601                                                                                                                                                                                                         |  |  |  |
| -241.2  | -         | R36546      | 242198_at      | Consensus includes gb:R36546 /FEA=EST /DB_XREF=gi:793447 /DB_XREF=est:yh89f11.s1 /CLONE=IMAGE:136941 /UG=Hs.25151 ESTs                                                                                                                     |  |  |  |
| -243.0  | -         | BE674736    | 230702_at      | Chromosome 8 open reading frame 16                                                                                                                                                                                                         |  |  |  |
| -243.1  | -         | AA833870    | 230808_at      | Transcribed locus                                                                                                                                                                                                                          |  |  |  |
| -257.6  | -         | AI807728    | 231315_at      | NK2 homeobox 1                                                                                                                                                                                                                             |  |  |  |
| -267.5  | -         | AW451103    | 237048_at      | CDNA clone IMAGE:4797878                                                                                                                                                                                                                   |  |  |  |
| -268.5  | -         | T90348      | 243348_at      | Consensus includes gb:T90348 /FEA=EST /DB_XREF=gi:718861 /DB_XREF=est:yd43a05.s1 /CLONE=IMAGE:110960 /UG=Hs.183404 ESTs                                                                                                                    |  |  |  |
| -300.7  | -         | AI922323    | 228969_at      | Anterior gradient homolog 2 (Xenopus laevis)                                                                                                                                                                                               |  |  |  |
| -316.1  | -         | AK000451    | 232897_at      | hypothetical protein FLJ20444                                                                                                                                                                                                              |  |  |  |
| -325.0  | -         | AW268162    | 238384_x_at    | Transcribed locus                                                                                                                                                                                                                          |  |  |  |
| -332.8  | -         | AI141692    | 237501_at      | CDNA FLJ37024 fis, clone BRACE2010837                                                                                                                                                                                                      |  |  |  |
| -337.5  | KCNIP2    | AB044584    | 224528_s_at    | Kv channel interacting protein 2                                                                                                                                                                                                           |  |  |  |
| -347.3  | ZCCHC2    | BC006340    | 224503_s_at    | Zinc finger, CCHC domain containing 2                                                                                                                                                                                                      |  |  |  |
| -349.7  | -         | AI475902    | 243514_at      | Transcribed locus                                                                                                                                                                                                                          |  |  |  |
| -352.0  | -         | AL137733    | 234664_at      | Hypothetical protein LOC284701                                                                                                                                                                                                             |  |  |  |
| -358.8  | -         | BF060678    | 229520_s_at    | Chromosome 14 open reading frame 118                                                                                                                                                                                                       |  |  |  |
| -366.7  | -         | AW615259    | 231143_at      | Hypothetical protein LOC100129514                                                                                                                                                                                                          |  |  |  |
| -391.7  | -         | AI831653    | 227323_at      | COX4 neighbor                                                                                                                                                                                                                              |  |  |  |
| -440.5  | -         | AA700218    | 244456_at      | Consensus includes gb:AA700218 /FEA=EST /DB_XREF=gi:2703181 /DB_XREF=est:zj44h04.s1 /CLONE=IMAGE:453175 /UG=Hs.189047 ESTs                                                                                                                 |  |  |  |
| -446.6  | -         | AI694242    | 240045_at      | Transcribed locus                                                                                                                                                                                                                          |  |  |  |
| -473.3  | ROR1      | AK000776    | 232060_at      | CDNA FLJ20769 fis, clone COL06674                                                                                                                                                                                                          |  |  |  |
| -476.6  | -         | AW904533    | 244584_at      | Chromosome 11 open reading frame 41                                                                                                                                                                                                        |  |  |  |
| -481.2  | IIFT57    | AF139576    | 222520_s_at    | Intraflagellar transport 57 homolog (Chlamydomonas)                                                                                                                                                                                        |  |  |  |
| -497.5  | -         | AA765841    | 242156_at      | Transcribed locus                                                                                                                                                                                                                          |  |  |  |
| -498.3  | -         | AA778783    | 240248_at      | Transcribed locus                                                                                                                                                                                                                          |  |  |  |
| -510.7  | LINC00589 | BC003524    | 232718_at      | chromosome 8 open reading frame 75                                                                                                                                                                                                         |  |  |  |
| -524.4  | -         | AW452079    | 231450_at      | Transcribed locus                                                                                                                                                                                                                          |  |  |  |
| -547.0  | MTBP      | AK022122    | 233211_at      | Mdm2, transformed 3T3 cell double minute 2, p53 binding protein (mouse) binding protein, 104kDa                                                                                                                                            |  |  |  |
| -548.5  | -         | BE550855    | 244635_s_at    | Hypothetical protein LOC100129436                                                                                                                                                                                                          |  |  |  |
| -559.9  | -         | AFFX-DapX-3 | AFFX-DapX-3_at | Bacillus subtilis dihydropicolinate reductase (jojE) gene, complete cds; poly(A) polymerase (jojI) gene, complete cds; biotin acetyl-CoA-carboxylase ligase (birA) gene, complete cds; jojC, jojD, jojF, jojG, jojH genes, complete cds's. |  |  |  |
| -570.5  | -         | AI073396    | 230856_at      | Transcribed locus                                                                                                                                                                                                                          |  |  |  |
| -573.1  | -         | AI914418    | 241206_at      | Transcribed locus                                                                                                                                                                                                                          |  |  |  |
| -594.2  | -         | T90358      | 229328_at      | Zinc finger protein 540                                                                                                                                                                                                                    |  |  |  |
| -620.7  | ZNF462    | AL359561    | 232393_at      | Zinc finger protein 462                                                                                                                                                                                                                    |  |  |  |
| -674.3  | -         | AW469569    | 236189_at      | Ankyrin repeat domain 50                                                                                                                                                                                                                   |  |  |  |
| -741.3  | -         | AI191905    | 242354_at      | Transcribed locus                                                                                                                                                                                                                          |  |  |  |
| -971.8  | -         | AA873726    | 237422_at      | Transcribed locus                                                                                                                                                                                                                          |  |  |  |
| -1424.5 | -         | AL139327    | 234473_at      | hCG1646718                                                                                                                                                                                                                                 |  |  |  |

### Down-Regulated Transcripts (U133A 133B)

|         |   |          |             |                                    |  |  |  |
|---------|---|----------|-------------|------------------------------------|--|--|--|
| -1592.4 | - | AW591969 | 240703_s_at | Transcribed locus                  |  |  |  |
| -1692.0 | - | BE855603 | 229320_at   | Chromosome 2 open reading frame 55 |  |  |  |
| -1795.3 | - | AI769817 | 240350_at   | Transcribed locus                  |  |  |  |
| -1923.1 | - | AW736788 | 233822_x_at | Transcribed locus                  |  |  |  |
| -2754.8 | - | BF058422 | 226311_at   | CDNA clone IMAGE:30924414          |  |  |  |
| -2754.8 | - | AA278233 | 241370_at   | hypothetical protein LOC286052     |  |  |  |
