# Supplementary material
Source: PubMed Central journal article supplement (PMC3615580)
Supplement: supp2.pdf [file supp2.pdf]

## Megakaryome: "Training Genes"

| Megakaryome    |             |                                                                                     |
|----------------|-------------|-------------------------------------------------------------------------------------|
| Entrez Gene ID | Gene Symbol | Gene Name                                                                           |
| 2              | A2M         | alpha-2-macroglobulin                                                               |
| 19             | ABCA1       | ATP-binding cassette, sub-family A (ABC1), member 1                                 |
| 64240          | ABCG5       | ATP-binding cassette, sub-family G (WHITE), member 5                                |
| 64241          | ABCG8       | ATP-binding cassette, sub-family G (WHITE), member 8                                |
| 28976          | ACAD9       | acyl-CoA dehydrogenase family, member 9                                             |
| 43             | ACHE        | acetylcholinesterase                                                                |
| 87             | ACTN1       | actinin, alpha 1                                                                    |
| 88             | ACTN2       | actinin, alpha 2                                                                    |
| 81             | ACTN4       | actinin, alpha 4                                                                    |
| 100            | ADA         | adenosine deaminase                                                                 |
| 102            | ADAM10      | ADAM metallopeptidase domain 10                                                     |
| 6868           | ADAM17      | ADAM metallopeptidase domain 17                                                     |
| 11093          | ADAMTS13    | ADAM metallopeptidase with thrombospondin type 1 motif, 13                          |
| 118            | ADD1        | adducin 1 (alpha)                                                                   |
| 135            | ADORA2A     | adenosine A2a receptor                                                              |
| 207            | AKT1        | v-akt murine thymoma viral oncogene homolog 1                                       |
| 208            | AKT2        | v-akt murine thymoma viral oncogene homolog 2                                       |
| 10000          | AKT3        | v-akt murine thymoma viral oncogene homolog 3 (protein kinase B, gamma)             |
| 213            | ALB         | albumin                                                                             |
| 226            | ALDOA       | aldolase A, fructose-bisphosphate                                                   |
| 239            | ALOX12      | arachidonate 12-lipoxygenase                                                        |
| 310            | ANXA7       | annexin A7                                                                          |
| 8546           | AP3B1       | adaptor-related protein complex 3, beta 1 subunit                                   |
| 8943           | AP3D1       | adaptor-related protein complex 3, delta 1 subunit                                  |
| 335            | APOA1       | apolipoprotein A-I                                                                  |
| 348            | APOE        | apolipoprotein E                                                                    |
| 351            | APP         | amyloid beta (A4) precursor protein                                                 |
| 5926           | ARID4A      | AT rich interactive domain 4A (RBP1-like)                                           |
| 51742          | ARID4B      | AT rich interactive domain 4B (RBP1-like)                                           |
| 406            | ARNTL       | aryl hydrocarbon receptor nuclear translocator-like                                 |
| 406216         | ATFB1       | Atrial fibrillation, familial 1                                                     |
| 545            | ATR         | ataxia telangiectasia and Rad3 related                                              |
| 751798         | AUNX1       | auditory neuropathy, X-linked recessive 1                                           |
| 572            | BAD         | BCL2-associated agonist of cell death                                               |
| 578            | BAK1        | BCL2-antagonist/killer 1                                                            |
| 55024          | BANK1       | B-cell scaffold protein with ankyrin repeats 1                                      |
| 596            | BCL2        | B-cell CLL/lymphoma 2                                                               |
| 598            | BCL2L1      | BCL2-like 1                                                                         |
| 10018          | BCL2L11     | BCL2-like 11 (apoptosis facilitator)                                                |
| 599            | BCL2L2      | BCL2-like 2                                                                         |
| 659            | BMPR2       | bone morphogenetic protein receptor, type II (serine/threonine kinase)              |
| 665            | BNIP3L      | BCL2/adenovirus E1B 19kDa interacting protein 3-like                                |
| 27154          | BRPF3       | bromodomain and PHD finger containing, 3                                            |
| 695            | BTK         | Bruton agammaglobulinemia tyrosine kinase                                           |
| 56244          | BTNL2       | butyrophilin-like 2 (MHC class II associated)                                       |
| 701            | BUB1B       | budding uninhibited by benzimidazoles 1 homolog beta (yeast)                        |
| 56652          | C10orf2     | chromosome 10 open reading frame 2                                                  |
| 56913          | C1GALT1     | core 1 synthase, glycoprotein-N-acetylgalactosamine 3-beta-galactosyltransferase, 1 |
| 720            | C4A         | complement component 4A (Rodgers blood group)                                       |
| 801            | CALM1       | calmodulin 1 (phosphorylase kinase, delta)                                          |
| 805            | CALM2       | calmodulin 2 (phosphorylase kinase, delta)                                          |
| 808            | CALM3       | calmodulin 3 (phosphorylase kinase, delta)                                          |

## Megakaryome: "Training Genes"

|        |         |                                                                                                   |
|--------|---------|---------------------------------------------------------------------------------------------------|
| 813    | CALU    | calumenin                                                                                         |
| 10487  | CAP1    | CAP, adenylate cyclase-associated protein 1 (yeast)                                               |
| 823    | CAPN1   | calpain 1, (mu/I) large subunit                                                                   |
| 843    | CASP10  | caspace 10, apoptosis-related cysteine peptidase                                                  |
| 836    | CASP3   | caspace 3, apoptosis-related cysteine peptidase                                                   |
| 842    | CASP9   | caspace 9, apoptosis-related cysteine peptidase                                                   |
| 9139   | CBFA2T2 | core-binding factor, runt domain, alpha subunit 2; translocated to, 2                             |
| 863    | CBFA2T3 | core-binding factor, runt domain, alpha subunit 2; translocated to, 3                             |
| 865    | CBFB    | core-binding factor, beta subunit                                                                 |
| 867    | CBL     | Cas-Br-M (murine) ecotropic retroviral transforming sequence                                      |
| 875    | CBS     | cystathionine-beta-synthase                                                                       |
| 6352   | CCL5    | chemokine (C-C motif) ligand 5                                                                    |
| 8900   | CCNA1   | cyclin A1                                                                                         |
| 896    | CCND3   | cyclin D3                                                                                         |
| 9134   | CCNE2   | cyclin E2                                                                                         |
| 948    | CD36    | CD36 molecule (thrombospondin receptor)                                                           |
| 959    | CD40LG  | CD40 ligand                                                                                       |
| 4179   | CD46    | CD46 molecule, complement regulatory protein                                                      |
| 1604   | CD55    | CD55 molecule, decay accelerating factor for complement (Cromer blood group)                      |
| 966    | CD59    | CD59 molecule, complement regulatory protein                                                      |
| 967    | CD63    | CD63 molecule                                                                                     |
| 928    | CD9     | CD9 molecule                                                                                      |
| 1017   | CDK2    | cyclin-dependent kinase 2                                                                         |
| 1021   | CDK6    | cyclin-dependent kinase 6                                                                         |
| 1027   | CDKN1B  | cyclin-dependent kinase inhibitor 1B (p27, Kip1)                                                  |
| 1028   | CDKN1C  | cyclin-dependent kinase inhibitor 1C (p57, Kip2)                                                  |
| 1029   | CDKN2A  | cyclin-dependent kinase inhibitor 2A (melanoma, p16, inhibits CDK4)                               |
| 1030   | CDKN2B  | cyclin-dependent kinase inhibitor 2B (p15, inhibits CDK4)                                         |
| 1675   | CFD     | complement factor D (adipsin)                                                                     |
| 3075   | CFH     | complement factor H                                                                               |
| 3078   | CFHR1   | complement factor H-related 1                                                                     |
| 10878  | CFHR3   | complement factor H-related 3                                                                     |
| 3426   | CFI     | complement factor I                                                                               |
| 1072   | CFL1    | cofilin 1 (non-muscle)                                                                            |
| 1080   | CFTR    | cystic fibrosis transmembrane conductance regulator (ATP-binding cassette sub-family C, member 7) |
| 1106   | CHD2    | chromodomain helicase DNA binding protein 2                                                       |
| 1186   | CLCN7   | chloride channel 7                                                                                |
| 51266  | CLEC1B  | C-type lectin domain family 1, member B                                                           |
| 1192   | CLIC1   | chloride intracellular channel 1                                                                  |
| 1191   | CLU     | clusterin                                                                                         |
| 55330  | CNO     | cappuccino homolog (mouse)                                                                        |
| 1277   | COL1A1  | collagen, type I, alpha 1                                                                         |
| 1278   | COL1A2  | collagen, type I, alpha 2                                                                         |
| 1287   | COL4A5  | collagen, type IV, alpha 5                                                                        |
| 11330  | CTRC    | chymotrypsin C (caldecrin)                                                                        |
| 1511   | CTSG    | cathepsin G                                                                                       |
| 8451   | CUL4A   | cullin 4A                                                                                         |
| 2919   | CXCL1   | chemokine (C-X-C motif) ligand 1 (melanoma growth stimulating activity, alpha)                    |
| 747    | DAGLA   | diacylglycerol lipase, alpha                                                                      |
| 221955 | DAGLB   | diacylglycerol lipase, beta                                                                       |
| 114086 | DBA2    | Diamond-Blackfan anemia 2                                                                         |
| 64421  | DCLRE1C | DNA cross-link repair 1C                                                                          |
| 1606   | DGKA    | diacylglycerol kinase, alpha 80kDa                                                                |
| 1607   | DGKB    | diacylglycerol kinase, beta 90kDa                                                                 |

## Megakaryome: "Training Genes"

|        |        |                                                                             |
|--------|--------|-----------------------------------------------------------------------------|
| 8527   | DGKD   | diacylglycerol kinase, delta 130kDa                                         |
| 8526   | DGKE   | diacylglycerol kinase, epsilon 64kDa                                        |
| 1608   | DGKG   | diacylglycerol kinase, gamma 90kDa                                          |
| 160851 | DGKH   | diacylglycerol kinase, eta                                                  |
| 9162   | DGKI   | diacylglycerol kinase, iota                                                 |
| 139189 | DGKK   | diacylglycerol kinase, kappa                                                |
| 1609   | DGKQ   | diacylglycerol kinase, theta 110kDa                                         |
| 8525   | DGKZ   | diacylglycerol kinase, zeta                                                 |
| 1716   | DGUOK  | deoxyguanosine kinase                                                       |
| 23405  | DICER1 | dicer 1, ribonuclease type III                                              |
| 11083  | DIDO1  | death inducer-obliterator 1                                                 |
| 1736   | DKC1   | dyskeratosis congenita 1, dyskerin                                          |
| 1773   | DNASE1 | deoxyribonuclease I                                                         |
| 85440  | DOCK7  | dedicator of cytokinesis 7                                                  |
| 9046   | DOK2   | docking protein 2, 56kDa                                                    |
| 84062  | DTNBP1 | dystrobrevin binding protein 1                                              |
| 8056   | ECB2   | erythrocytosis, autosomal recessive benign 2                                |
| 1950   | EGF    | epidermal growth factor                                                     |
| 1958   | EGR1   | early growth response 1                                                     |
| 1991   | ELANE  | elastase, neutrophil expressed                                              |
| 2006   | ELN    | elastin                                                                     |
| 953    | ENTPD1 | ectonucleoside triphosphate diphosphohydrolase 1                            |
| 2033   | EP300  | E1A binding protein p300                                                    |
| 57634  | EP400  | E1A binding protein p400                                                    |
| 2052   | EPHX1  | epoxide hydrolase 1, microsomal (xenobiotic)                                |
| 2057   | EPOR   | erythropoietin receptor                                                     |
| 2078   | ERG    | v-ets erythroblastosis virus E26 oncogene homolog (avian)                   |
| 2100   | ESR2   | estrogen receptor 2 (ER beta)                                               |
| 2120   | ETV6   | ets variant 6                                                               |
| 2162   | F13A1  | coagulation factor XIII, A1 polypeptide                                     |
| 2147   | F2     | coagulation factor II (thrombin)                                            |
| 2149   | F2R    | coagulation factor II (thrombin) receptor                                   |
| 2151   | F2RL2  | coagulation factor II (thrombin) receptor-like 2                            |
| 9002   | F2RL3  | coagulation factor II (thrombin) receptor-like 3                            |
| 2153   | F5     | coagulation factor V (proaccelerin, labile factor)                          |
| 2157   | F8     | coagulation factor VIII, procoagulant component                             |
| 9415   | FADS2  | fatty acid desaturase 2                                                     |
| 2175   | FANCA  | Fanconi anemia, complementation group A                                     |
| 2176   | FANCC  | Fanconi anemia, complementation group C                                     |
| 2177   | FANCD2 | Fanconi anemia, complementation group D2                                    |
| 2178   | FANCE  | Fanconi anemia, complementation group E                                     |
| 355    | FAS    | Fas (TNF receptor superfamily, member 6)                                    |
| 356    | FASLG  | Fas ligand (TNF superfamily, member 6)                                      |
| 2207   | FCER1G | Fc fragment of IgE, high affinity I, receptor for; gamma polypeptide        |
| 2213   | FCGR2B | Fc fragment of IgG, low affinity IIb, receptor (CD32)                       |
| 9103   | FCGR2C | Fc fragment of IgG, low affinity IIc, receptor for (CD32) (gene/pseudogene) |
| 2214   | FCGR3A | Fc fragment of IgG, low affinity IIIa, receptor (CD16a)                     |
| 83706  | FERMT3 | fermitin family member 3                                                    |
| 2242   | FES    | feline sarcoma oncogene                                                     |
| 2243   | FGA    | fibrinogen alpha chain                                                      |
| 2244   | FGB    | fibrinogen beta chain                                                       |
| 2247   | FGF2   | fibroblast growth factor 2 (basic)                                          |
| 2266   | FGG    | fibrinogen gamma chain                                                      |
| 2277   | FIGF   | c-fos induced growth factor (vascular endothelial growth factor D)          |
| 2313   | FLI1   | Friend leukemia virus integration 1                                         |

## Megakaryome: "Training Genes"

|       |        |                                                                                          |
|-------|--------|------------------------------------------------------------------------------------------|
| 2316  | FLNA   | filamin A, alpha                                                                         |
| 2335  | FN1    | fibronectin 1                                                                            |
| 2353  | FOS    | FBJ murine osteosarcoma viral oncogene homolog                                           |
| 8456  | FOXP1  | forkhead box N1                                                                          |
| 50943 | FOXP3  | forkhead box P3                                                                          |
| 84434 | FTX    | Thrombocytosis, familial X-linked                                                        |
| 2529  | FUT7   | fucosyltransferase 7 (alpha (1,3) fucosyltransferase)                                    |
| 2533  | FYB    | FYN binding protein                                                                      |
| 2534  | FYN    | FYN oncogene related to SRC, FGR, YES                                                    |
| 92579 | G6PC3  | glucose 6 phosphatase, catalytic, 3                                                      |
| 2581  | GALC   | galactosylceramidase                                                                     |
| 2621  | GAS6   | growth arrest-specific 6                                                                 |
| 2623  | GATA1  | GATA binding protein 1 (globin transcription factor 1)                                   |
| 2629  | GBA    | glucosidase, beta, acid                                                                  |
| 2672  | GFI1   | growth factor independent 1 transcription repressor                                      |
| 8328  | GFI1B  | growth factor independent 1B transcription repressor                                     |
| 55340 | GIMAP5 | GTPase, IMAP family member 5                                                             |
| 2702  | GJA5   | gap junction protein, alpha 5, 40kDa                                                     |
| 2767  | GNA11  | guanine nucleotide binding protein (G protein), alpha 11 (Gq class)                      |
| 2768  | GNA12  | guanine nucleotide binding protein (G protein) alpha 12                                  |
| 10672 | GNA13  | guanine nucleotide binding protein (G protein), alpha 13                                 |
| 9630  | GNA14  | guanine nucleotide binding protein (G protein), alpha 14                                 |
| 2769  | GNA15  | guanine nucleotide binding protein (G protein), alpha 15 (Gq class)                      |
| 2770  | GNAI1  | guanine nucleotide binding protein (G protein), alpha inhibiting activity polypeptide 1  |
| 2771  | GNAI2  | guanine nucleotide binding protein (G protein), alpha inhibiting activity polypeptide 2  |
| 2773  | GNAI3  | guanine nucleotide binding protein (G protein), alpha inhibiting activity polypeptide 3  |
| 2776  | GNAQ   | guanine nucleotide binding protein (G protein), q polypeptide                            |
| 2781  | GNAZ   | guanine nucleotide binding protein (G protein), alpha z polypeptide                      |
| 2782  | GNB1   | guanine nucleotide binding protein (G protein), beta polypeptide 1                       |
| 2783  | GNB2   | guanine nucleotide binding protein (G protein), beta polypeptide 2                       |
| 2784  | GNB3   | guanine nucleotide binding protein (G protein), beta polypeptide 3                       |
| 59345 | GNB4   | guanine nucleotide binding protein (G protein), beta polypeptide 4                       |
| 10681 | GNB5   | guanine nucleotide binding protein (G protein), beta 5                                   |
| 2790  | GNG10  | guanine nucleotide binding protein (G protein), gamma 10                                 |
| 2791  | GNG11  | guanine nucleotide binding protein (G protein), gamma 11                                 |
| 55970 | GNG12  | guanine nucleotide binding protein (G protein), gamma 12                                 |
| 51764 | GNG13  | guanine nucleotide binding protein (G protein), gamma 13                                 |
| 54331 | GNG2   | guanine nucleotide binding protein (G protein), gamma 2                                  |
| 2785  | GNG3   | guanine nucleotide binding protein (G protein), gamma 3                                  |
| 2786  | GNG4   | guanine nucleotide binding protein (G protein), gamma 4                                  |
| 2787  | GNG5   | guanine nucleotide binding protein (G protein), gamma 5                                  |
| 2788  | GNG7   | guanine nucleotide binding protein (G protein), gamma 7                                  |
| 94235 | GNG8   | guanine nucleotide binding protein (G protein), gamma 8                                  |
| 2792  | GNGT1  | guanine nucleotide binding protein (G protein), gamma transducing activity polypeptide 1 |
| 2793  | GNGT2  | guanine nucleotide binding protein (G protein), gamma transducing activity polypeptide 2 |
| 2811  | GP1BA  | glycoprotein Ib (platelet), alpha polypeptide                                            |
| 2812  | GP1BB  | glycoprotein Ib (platelet), beta polypeptide                                             |
| 2814  | GP5    | glycoprotein V (platelet)                                                                |
| 51206 | GP6    | glycoprotein VI (platelet)                                                               |
| 2815  | GP9    | glycoprotein IX (platelet)                                                               |
| 2876  | GPX1   | glutathione peroxidase 1                                                                 |
| 2934  | GSN    | gelsolin                                                                                 |
| 2969  | GTF2I  | general transcription factor Iii                                                         |

## Megakaryome: "Training Genes"

|       |          |                                                                                                       |
|-------|----------|-------------------------------------------------------------------------------------------------------|
| 9569  | GTF2IRD1 | GTF2I repeat domain containing 1                                                                      |
| 2982  | GUCY1A3  | guanylate cyclase 1, soluble, alpha 3                                                                 |
| 2983  | GUCY1B3  | guanylate cyclase 1, soluble, beta 3                                                                  |
| 22927 | HABP4    | hyaluronan binding protein 4                                                                          |
| 3040  | HBA2     | hemoglobin, alpha 2                                                                                   |
| 3050  | HBZ      | hemoglobin, zeta                                                                                      |
| 3082  | HGF      | hepatocyte growth factor (hepapoietin A; scatter factor)                                              |
| 3117  | HLA-DQA1 | major histocompatibility complex, class II, DQ alpha 1                                                |
| 3119  | HLA-DQB1 | major histocompatibility complex, class II, DQ beta 1                                                 |
| 3123  | HLA-DRB1 | major histocompatibility complex, class II, DR beta 1                                                 |
| 3141  | HLCS     | holocarboxylase synthetase (biotin-(propionyl-CoA-carboxylase (ATP-hydrolysing)) ligase)              |
| 3207  | HOXA11   | homeobox A11                                                                                          |
| 27259 | HPLH1    | hemophagocytic lymphohistiocytosis 1                                                                  |
| 3257  | HPS1     | Hermansky-Pudlak syndrome 1                                                                           |
| 84343 | HPS3     | Hermansky-Pudlak syndrome 3                                                                           |
| 89781 | HPS4     | Hermansky-Pudlak syndrome 4                                                                           |
| 11234 | HPS5     | Hermansky-Pudlak syndrome 5                                                                           |
| 79803 | HPS6     | Hermansky-Pudlak syndrome 6                                                                           |
| 3273  | HRG      | histidine-rich glycoprotein                                                                           |
| 3309  | HSPA5    | heat shock 70kDa protein 5 (glucose-regulated protein, 78kDa)                                         |
| 8692  | HYAL2    | hyaluronoglucosaminidase 2                                                                            |
| 3384  | ICAM2    | intercellular adhesion molecule 2                                                                     |
| 3479  | IGF1     | insulin-like growth factor 1 (somatomedin C)                                                          |
| 8517  | IKBKG    | inhibitor of kappa light polypeptide gene enhancer in B-cells, kinase gamma                           |
| 3589  | IL11     | interleukin 11                                                                                        |
| 3590  | IL11RA   | interleukin 11 receptor, alpha                                                                        |
| 3553  | IL1B     | interleukin 1, beta                                                                                   |
| 3554  | IL1R1    | interleukin 1 receptor, type I                                                                        |
| 3561  | IL2RG    | interleukin 2 receptor, gamma                                                                         |
| 3563  | IL3RA    | interleukin 3 receptor, alpha (low affinity)                                                          |
| 3569  | IL6      | interleukin 6 (interferon, beta 2)                                                                    |
| 3570  | IL6R     | interleukin 6 receptor                                                                                |
| 3572  | IL6ST    | interleukin 6 signal transducer (gp130, oncostatin M receptor)                                        |
| 3576  | IL8      | interleukin 8                                                                                         |
| 3635  | INPP5D   | inositol polyphosphate-5-phosphatase, 145kDa                                                          |
| 8268  | IPOX     | Intestinal pseudoobstruction, neuronal, primary idiopathic                                            |
| 3394  | IRF8     | interferon regulatory factor 8                                                                        |
| 3673  | ITGA2    | integrin, alpha 2 (CD49B, alpha 2 subunit of VLA-2 receptor)                                          |
| 3674  | ITGA2B   | integrin, alpha 2b (platelet glycoprotein IIb of IIb/IIIa complex, antigen CD41)                      |
| 3683  | ITGAL    | integrin, alpha L (antigen CD11A (p180), lymphocyte function-associated antigen 1; alpha polypeptide) |
| 3687  | ITGAX    | integrin, alpha X (complement component 3 receptor 4 subunit)                                         |
| 3688  | ITGB1    | integrin, beta 1 (fibronectin receptor, beta polypeptide, antigen CD29 includes MDF2, MSK12)          |
| 3689  | ITGB2    | integrin, beta 2 (complement component 3 receptor 3 and 4 subunit)                                    |
| 3690  | ITGB3    | integrin, beta 3 (platelet glycoprotein IIIa, antigen CD61)                                           |
| 3702  | ITK      | IL2-inducible T-cell kinase                                                                           |
| 3708  | ITPR1    | inositol 1,4,5-triphosphate receptor, type 1                                                          |
| 3709  | ITPR2    | inositol 1,4,5-triphosphate receptor, type 2                                                          |
| 3710  | ITPR3    | inositol 1,4,5-triphosphate receptor, type 3                                                          |
| 3712  | IVD      | isovaleryl-CoA dehydrogenase                                                                          |
| 3717  | JAK2     | Janus kinase 2                                                                                        |
| 3720  | JARID2   | jumonji, AT rich interactive domain 2                                                                 |
| 3719  | JBS      | Jacobsen syndrome                                                                                     |

## Megakaryome: "Training Genes"

|        |        |                                                                                        |
|--------|--------|----------------------------------------------------------------------------------------|
| 3727   | JUND   | jun D proto-oncogene                                                                   |
| 9992   | KCNE2  | potassium voltage-gated channel, Isk-related family, member 2                          |
| 3784   | KCNQ1  | potassium voltage-gated channel, KQT-like subfamily, member 1                          |
| 3815   | KIT    | v-kit Hardy-Zuckerman 4 feline sarcoma viral oncogene homolog                          |
| 3826   | KMS    | Kabuki mental retardation syndrome                                                     |
| 3827   | KNG1   | kininogen 1                                                                            |
| 3920   | LAMP2  | lysosomal-associated membrane protein 2                                                |
| 27040  | LAT    | linker for activation of T cells                                                       |
| 3930   | LBR    | lamin B receptor                                                                       |
| 3937   | LCP2   | lymphocyte cytosolic protein 2 (SH2 domain containing leukocyte protein of 76kDa)      |
| 7044   | LEFTY2 | left-right determination factor 2                                                      |
| 3976   | LIF    | leukemia inhibitory factor (cholinergic differentiation factor)                        |
| 55788  | LMBRD1 | LMBR1 domain containing 1                                                              |
| 4005   | LMO2   | LIM domain only 2 (rhombotin-like 1)                                                   |
| 4067   | LYN    | v-yes-1 Yamaguchi sarcoma viral related oncogene homolog                               |
| 1130   | LYST   | lysosomal trafficking regulator                                                        |
| 4097   | MAFG   | v-maf musculoaponeurotic fibrosarcoma oncogene homolog G (avian)                       |
| 1432   | MAPK14 | mitogen-activated protein kinase 14                                                    |
| 84930  | MASTL  | microtubule associated serine/threonine kinase-like                                    |
| 4170   | MCL1   | myeloid cell leukemia sequence 1 (BCL2-related)                                        |
| 4194   | MDM4   | Mdm4 p53 binding protein homolog (mouse)                                               |
| 2122   | MECOM  | MDS1 and EVI1 complex locus                                                            |
| 5469   | MED1   | mediator complex subunit 1                                                             |
| 4211   | MEIS1  | Meis homeobox 1                                                                        |
| 4223   | MEOX2  | mesenchyme homeobox 2                                                                  |
| 10461  | MERTK  | c-mer proto-oncogene tyrosine kinase                                                   |
| 4237   | MFAP2  | microfibrillar-associated protein 2                                                    |
| 11343  | MGLL   | monoglyceride lipase                                                                   |
| 4297   | MLL    | myeloid/lymphoid or mixed-lineage leukemia (trithorax homolog, Drosophila)             |
| 55904  | MLL5   | myeloid/lymphoid or mixed-lineage leukemia 5 (trithorax homolog, Drosophila)           |
| 166785 | MMAA   | methylmalonic aciduria (cobalamin deficiency) cblA type                                |
| 326625 | MMAB   | methylmalonic aciduria (cobalamin deficiency) cblB type                                |
| 25974  | MMACHC | methylmalonic aciduria (cobalamin deficiency) cblC type, with homocystinuria           |
| 4318   | MMP9   | matrix metalloproteinase 9 (gelatinase B, 92kDa gelatinase, 92kDa type IV collagenase) |
| 22915  | MMRN1  | multimerin 1                                                                           |
| 4351   | MPI    | mannose phosphate isomerase                                                            |
| 4352   | MPL    | myeloproliferative leukemia virus oncogene                                             |
| 4358   | MPV17  | MpV17 mitochondrial inner membrane protein                                             |
| 4594   | MUT    | methylmalonyl CoA mutase                                                               |
| 63915  | MUTED  | muted homolog (mouse)                                                                  |
| 4598   | MVK    | mevalonate kinase                                                                      |
| 4602   | MYB    | v-myb myeloblastosis viral oncogene homolog (avian)                                    |
| 4609   | MYC    | v-myc myelocytomatosis viral oncogene homolog (avian)                                  |
| 4627   | MYH9   | myosin, heavy chain 9, non-muscle                                                      |
| 4683   | NBN    | nibrin                                                                                 |
| 10397  | NDRG1  | N-myc downstream regulated 1                                                           |
| 4778   | NFE2   | nuclear factor (erythroid-derived 2), 45kDa                                            |
| 4780   | NFE2L2 | nuclear factor (erythroid-derived 2)-like 2                                            |
| 55651  | NHP2   | NHP2 ribonucleoprotein homolog (yeast)                                                 |
| 25836  | NIPBL  | Nipped-B homolog (Drosophila)                                                          |
| 114548 | NLRP3  | NLR family, pyrin domain containing 3                                                  |
| 64127  | NOD2   | nucleotide-binding oligomerization domain containing 2                                 |
| 55505  | NOP10  | NOP10 ribonucleoprotein homolog (yeast)                                                |
| 4843   | NOS2   | nitric oxide synthase 2, inducible                                                     |
| 4846   | NOS3   | nitric oxide synthase 3 (endothelial cell)                                             |

## Megakaryome: "Training Genes"

|        |         |                                                                                                 |
|--------|---------|-------------------------------------------------------------------------------------------------|
| 4869   | NPM1    | nucleophosmin (nucleolar phosphoprotein B23, numatrin)                                          |
| 1728   | NQO1    | NAD(P)H dehydrogenase, quinone 1                                                                |
| 4835   | NQO2    | NAD(P)H dehydrogenase, quinone 2                                                                |
| 4907   | NT5E    | 5'-nucleotidase, ecto (CD73)                                                                    |
| 84876  | ORAI1   | ORAI calcium release-activated calcium modulator 1                                              |
| 9180   | OSMR    | oncostatin M receptor                                                                           |
| 28962  | OSTM1   | osteopetrosis associated transmembrane protein 1                                                |
| 5023   | P2RX1   | purinergic receptor P2X, ligand-gated ion channel, 1                                            |
| 5028   | P2RY1   | purinergic receptor P2Y, G-protein coupled, 1                                                   |
| 64805  | P2RY12  | purinergic receptor P2Y, G-protein coupled, 12                                                  |
| 5095   | PCCA    | propionyl CoA carboxylase, alpha polypeptide                                                    |
| 5096   | PCCB    | propionyl CoA carboxylase, beta polypeptide                                                     |
| 5133   | PDCD1   | programmed cell death 1                                                                         |
| 5154   | PDGFA   | platelet-derived growth factor alpha polypeptide                                                |
| 5155   | PDGFB   | platelet-derived growth factor beta polypeptide (simian sarcoma viral (v-sis) oncogene homolog) |
| 56034  | PDGFC   | platelet derived growth factor C                                                                |
| 5159   | PDGFRB  | platelet-derived growth factor receptor, beta polypeptide                                       |
| 5170   | PDPK1   | 3-phosphoinositide dependent protein kinase-1                                                   |
| 5175   | PECAM1  | platelet/endothelial cell adhesion molecule                                                     |
| 5177   | PEE1    | preeclampsia/eclampsia 1                                                                        |
| 5196   | PF4     | platelet factor 4                                                                               |
| 5216   | PFN1    | profilin 1                                                                                      |
| 5238   | PGM3    | phosphoglucomutase 3                                                                            |
| 26227  | PHGDH   | phosphoglycerate dehydrogenase                                                                  |
| 93183  | PIGM    | phosphatidylinositol glycan anchor biosynthesis, class M                                        |
| 5287   | PIK3C2B | phosphoinositide-3-kinase, class 2, beta polypeptide                                            |
| 5290   | PIK3CA  | phosphoinositide-3-kinase, catalytic, alpha polypeptide                                         |
| 5291   | PIK3CB  | phosphoinositide-3-kinase, catalytic, beta polypeptide                                          |
| 5293   | PIK3CD  | phosphoinositide-3-kinase, catalytic, delta polypeptide                                         |
| 5294   | PIK3CG  | phosphoinositide-3-kinase, catalytic, gamma polypeptide                                         |
| 5295   | PIK3R1  | phosphoinositide-3-kinase, regulatory subunit 1 (alpha)                                         |
| 23533  | PIK3R5  | phosphoinositide-3-kinase, regulatory subunit 5                                                 |
| 146850 | PIK3R6  | phosphoinositide-3-kinase, regulatory subunit 6                                                 |
| 415116 | PIM3    | pim-3 oncogene                                                                                  |
| 23396  | PIP5K1C | phosphatidylinositol-4-phosphate 5-kinase, type I, gamma                                        |
| 5309   | PITX3   | paired-like homeodomain 3                                                                       |
| 5321   | PLA2G4A | phospholipase A2, group IVA (cytosolic, calcium-dependent)                                      |
| 5327   | PLAT    | plasminogen activator, tissue                                                                   |
| 5331   | PLCB3   | phospholipase C, beta 3 (phosphatidylinositol-specific)                                         |
| 5336   | PLCG2   | phospholipase C, gamma 2 (phosphatidylinositol-specific)                                        |
| 26258  | PLDN    | pallidin homolog (mouse)                                                                        |
| 5341   | PLEK    | pleckstrin                                                                                      |
| 5340   | PLG     | plasminogen                                                                                     |
| 5373   | PMM2    | phosphomannomutase 2                                                                            |
| 4860   | PNP     | purine nucleoside phosphorylase                                                                 |
| 440915 | POTEKP  | POTE ankyrin domain family, member K, pseudogene                                                |
| 5473   | PPBP    | pro-platelet basic protein (chemokine (C-X-C motif) ligand 7)                                   |
| 5478   | PPIA    | peptidylprolyl isomerase A (cyclophilin A)                                                      |
| 5578   | PRKCA   | protein kinase C, alpha                                                                         |
| 5579   | PRKCB   | protein kinase C, beta                                                                          |
| 5582   | PRKCG   | protein kinase C, gamma                                                                         |
| 5588   | PRKCQ   | protein kinase C, theta                                                                         |
| 5590   | PRKCZ   | protein kinase C, zeta                                                                          |
| 5624   | PROC    | protein C (inactivator of coagulation factors Va and VIIIa)                                     |

## Megakaryome: "Training Genes"

|        |          |                                                                                                             |
|--------|----------|-------------------------------------------------------------------------------------------------------------|
| 10544  | PROCR    | protein C receptor, endothelial                                                                             |
| 5627   | PROS1    | protein S (alpha)                                                                                           |
| 5644   | PRSS1    | protease, serine, 1 (trypsin 1)                                                                             |
| 5660   | PSAP     | prosaposin                                                                                                  |
| 9051   | PSTPIP1  | proline-serine-threonine phosphatase interacting protein 1                                                  |
| 5739   | PTGIR    | prostaglandin I2 (prostacyclin) receptor (IP)                                                               |
| 5742   | PTGS1    | prostaglandin-endoperoxide synthase 1 (prostaglandin G/H synthase and cyclooxygenase)                       |
| 5743   | PTGS2    | prostaglandin-endoperoxide synthase 2 (prostaglandin G/H synthase and cyclooxygenase)                       |
| 5781   | PTPN11   | protein tyrosine phosphatase, non-receptor type 11                                                          |
| 26191  | PTPN22   | protein tyrosine phosphatase, non-receptor type 22 (lymphoid)                                               |
| 5780   | PTPN9    | protein tyrosine phosphatase, non-receptor type 9                                                           |
| 9232   | PTTG1    | pituitary tumor-transforming 1                                                                              |
| 5873   | RAB27A   | RAB27A, member RAS oncogene family                                                                          |
| 5874   | RAB27B   | RAB27B, member RAS oncogene family                                                                          |
| 5875   | RABGGTA  | Rab geranylgeranyltransferase, alpha subunit                                                                |
| 10111  | RAD50    | RAD50 homolog ( <i>S. cerevisiae</i> )                                                                      |
| 5896   | RAG1     | recombination activating gene 1                                                                             |
| 5897   | RAG2     | recombination activating gene 2                                                                             |
| 5908   | RAP1B    | RAP1B, member of RAS oncogene family                                                                        |
| 5921   | RASA1    | RAS p21 protein activator (GTPase activating protein) 1                                                     |
| 10235  | RASGRP2  | RAS guanyl releasing protein 2 (calcium and DAG-regulated)                                                  |
| 5925   | RB1      | retinoblastoma 1                                                                                            |
| 149041 | RC3H1    | ring finger and CCCH-type domains 1                                                                         |
| 6045   | RNF2     | ring finger protein 2                                                                                       |
| 6223   | RPS19    | ribosomal protein S19                                                                                       |
| 861    | RUNX1    | runt-related transcription factor 1                                                                         |
| 57167  | SALL4    | sal-like 4 ( <i>Drosophila</i> )                                                                            |
| 51119  | SBDS     | Shwachman-Bodian-Diamond syndrome                                                                           |
| 950    | SCARB2   | scavenger receptor class B, member 2                                                                        |
| 29106  | SCG3     | secretogranin III                                                                                           |
| 6403   | SELP     | selectin P (granule membrane protein 140kDa, antigen CD62)                                                  |
| 29843  | SENP1    | SUMO1/sentrin specific peptidase 1                                                                          |
| 5413   | SEPT5    | septin 5                                                                                                    |
| 5265   | SERPINA1 | serpin peptidase inhibitor, clade A (alpha-1 antiproteinase, antitrypsin), member 1                         |
| 5055   | SERPINB2 | serpin peptidase inhibitor, clade B (ovalbumin), member 2                                                   |
| 462    | SERPINC1 | serpin peptidase inhibitor, clade C (antithrombin), member 1                                                |
| 3053   | SERPIND1 | serpin peptidase inhibitor, clade D (heparin cofactor), member 1                                            |
| 5054   | SERPINE1 | serpin peptidase inhibitor, clade E (nexin, plasminogen activator inhibitor type 1), member 1               |
| 5345   | SERPINF2 | serpin peptidase inhibitor, clade F (alpha-2 antiplasmin, pigment epithelium derived factor), member 2      |
| 710    | SERPING1 | serpin peptidase inhibitor, clade G (C1 inhibitor), member 1                                                |
| 10019  | SH2B3    | SH2B adaptor protein 3                                                                                      |
| 4068   | SH2D1A   | SH2 domain containing 1A                                                                                    |
| 140885 | SIRPA    | signal-regulatory protein alpha                                                                             |
| 10560  | SLC19A2  | solute carrier family 19 (thiamine transporter), member 2                                                   |
| 81031  | SLC2A10  | solute carrier family 2 (facilitated glucose transporter), member 10                                        |
| 10559  | SLC35A1  | solute carrier family 35 (CMP-sialic acid transporter), member A1                                           |
| 340146 | SLC35D3  | solute carrier family 35, member D3                                                                         |
| 113235 | SLC46A1  | solute carrier family 46 (folate transporter), member 1                                                     |
| 6521   | SLC4A1   | solute carrier family 4, anion exchanger, member 1 (erythrocyte membrane protein band 3, Diego blood group) |
| 8671   | SLC4A4   | solute carrier family 4, sodium bicarbonate cotransporter, member 4                                         |



## Megakaryome: "Training Genes"

|           |          |                                                                                                |
|-----------|----------|------------------------------------------------------------------------------------------------|
| 23657     | SLC7A11  | solute carrier family 7, (cationic amino acid transporter, y+ system) member 11                |
| 9056      | SLC7A7   | solute carrier family 7 (cationic amino acid transporter, y+ system), member 7                 |
| 7833      | SLEB1    | systemic lupus erythematosus susceptibility 1                                                  |
| 64695     | SLEB3    | systemic lupus erythematosus susceptibility 3                                                  |
| 404714    | SLEB4    | systemic lupus erythematosus, susceptibility to, 4                                             |
| 100188798 | SLEB5    | Systemic lupus erythematosus, susceptibility to, 5                                             |
| 170682    | SLEH1    | systemic lupus erythematosus with hemolytic anemia 1                                           |
| 6590      | SLPI     | secretory leukocyte peptidase inhibitor                                                        |
| 4093      | SMAD9    | SMAD family member 9                                                                           |
| 50485     | SMARCAL1 | SWI/SNF related, matrix associated, actin dependent regulator of chromatin, subfamily a-like 1 |
| 6591      | SNAI2    | snail homolog 2 (Drosophila)                                                                   |
| 8651      | SOCS1    | suppressor of cytokine signaling 1                                                             |
| 6647      | SOD1     | superoxide dismutase 1, soluble                                                                |
| 64321     | SOX17    | SRY (sex determining region Y)-box 17                                                          |
| 6678      | SPARC    | secreted protein, acidic, cysteine-rich (osteonectin)                                          |
| 6690      | SPINK1   | serine peptidase inhibitor, Kazal type 1                                                       |
| 200734    | SPRED2   | sprouty-related, EVH1 domain containing 2                                                      |
| 84727     | SPSB2    | splA/ryanodine receptor domain and SOCS box containing 2                                       |
| 6714      | SRC      | v-src sarcoma (Schmidt-Ruppin A-2) viral oncogene homolog (avian)                              |
| 5552      | SRGN     | serglycin                                                                                      |
| 6484      | ST3GAL4  | ST3 beta-galactoside alpha-2,3-sialyltransferase 4                                             |
| 6772      | STAT1    | signal transducer and activator of transcription 1, 91kDa                                      |
| 6774      | STAT3    | signal transducer and activator of transcription 3 (acute-phase response factor)               |
| 6775      | STAT4    | signal transducer and activator of transcription 4                                             |
| 6776      | STAT5A   | signal transducer and activator of transcription 5A                                            |
| 55240     | STEAP3   | STEAP family member 3                                                                          |
| 6786      | STIM1    | stromal interaction molecule 1                                                                 |
| 6794      | STK11    | serine/threonine kinase 11                                                                     |
| 219736    | STOX1    | storkhead box 1                                                                                |
| 6810      | STX4     | syntaxin 4                                                                                     |
| 6814      | STXBP3   | syntaxin binding protein 3                                                                     |
| 8803      | SUCLA2   | succinate-CoA ligase, ADP-forming, beta subunit                                                |
| 6783      | SULT1E1  | sulfotransferase family 1E, estrogen-preferring, member 1                                      |
| 23512     | SUZ12    | suppressor of zeste 12 homolog (Drosophila)                                                    |
| 6850      | SYK      | spleen tyrosine kinase                                                                         |
| 6886      | TAL1     | T-cell acute lymphocytic leukemia 1                                                            |
| 100034701 | TAR      | Thrombocytopenia-absent radius syndrome                                                        |
| 6915      | TBXA2R   | thromboxane A2 receptor                                                                        |
| 6916      | TBXAS1   | thromboxane A synthase 1 (platelet)                                                            |
| 10312     | TCIRG1   | T-cell, immune regulator 1, ATPase, H+ transporting, lysosomal V0 subunit A3                   |
| 6948      | TCN2     | transcobalamin II                                                                              |
| 140892    | TCPT     | thrombocytopenia, Paris-Trousseau type                                                         |
| 7006      | TEC      | tec protein tyrosine kinase                                                                    |
| 7012      | TERC     | telomerase RNA component                                                                       |
| 7015      | TERT     | telomerase reverse transcriptase                                                               |
| 7018      | TF       | transferrin                                                                                    |
| 7040      | TGFB1    | transforming growth factor, beta 1                                                             |
| 7042      | TGFB2    | transforming growth factor, beta 2                                                             |
| 7043      | TGFB3    | transforming growth factor, beta 3                                                             |
| 7057      | THBS1    | thrombospondin 1                                                                               |
| 7058      | THBS2    | thrombospondin 2                                                                               |
| 7059      | THBS3    | thrombospondin 3                                                                               |
| 7060      | THBS4    | thrombospondin 4                                                                               |
| 7066      | THPO     | thrombopoietin                                                                                 |

## Megakaryome: "Training Genes"

|        |         |                                                       |
|--------|---------|-------------------------------------------------------|
| 7076   | TIMP1   | TIMP metalloproteinase inhibitor 1                    |
| 26277  | TINF2   | TERF1 (TRF1)-interacting nuclear factor 2             |
| 7084   | TK2     | thymidine kinase 2, mitochondrial                     |
| 7094   | TLN1    | talin 1                                               |
| 7114   | TMSB4X  | thymosin beta 4, X-linked                             |
| 8600   | TNFSF11 | tumor necrosis factor (ligand) superfamily, member 11 |
| 146691 | TOM1L2  | target of myb1-like 2 (chicken)                       |
| 7172   | TPMT    | thiopurine S-methyltransferase                        |
| 340205 | TREML1  | triggering receptor expressed on myeloid cells-like 1 |
| 11277  | TREX1   | three prime repair exonuclease 1                      |
| 340348 | TSPAN33 | tetraspanin 33                                        |
| 57217  | TTC7A   | tetratricopeptide repeat domain 7A                    |
| 7273   | TTN     | titin                                                 |
| 7277   | TUBA4A  | tubulin, alpha 4a                                     |
| 81027  | TUBB1   | tubulin, beta 1                                       |
| 57045  | TWSG1   | twisted gastrulation homolog 1 (Drosophila)           |
| 201294 | UNC13D  | unc-13 homolog D (C. elegans)                         |
| 7390   | UROS    | uroporphyrinogen III synthase                         |
| 11274  | USP18   | ubiquitin specific peptidase 18                       |
| 9341   | VAMP3   | vesicle-associated membrane protein 3 (cellubrevin)   |
| 8673   | VAMP8   | vesicle-associated membrane protein 8 (endobrevin)    |
| 7408   | VASP    | vasodilator-stimulated phosphoprotein                 |
| 7409   | VAV1    | vav 1 guanine nucleotide exchange factor              |
| 7410   | VAV2    | vav 2 guanine nucleotide exchange factor              |
| 10451  | VAV3    | vav 3 guanine nucleotide exchange factor              |
| 7414   | VCL     | vinculin                                              |
| 7422   | VEGFA   | vascular endothelial growth factor A                  |
| 7423   | VEGFB   | vascular endothelial growth factor B                  |
| 7424   | VEGFC   | vascular endothelial growth factor C                  |
| 7428   | VHL     | von Hippel-Lindau tumor suppressor                    |
| 65082  | VPS33A  | vacuolar protein sorting 33 homolog A (S. cerevisiae) |
| 7448   | VTN     | vitronectin                                           |
| 7450   | VWF     | von Willebrand factor                                 |
| 7454   | WAS     | Wiskott-Aldrich syndrome (eczema-thrombocytopenia)    |
| 9948   | WDR1    | WD repeat domain 1                                    |
| 7466   | WFS1    | Wolfram syndrome 1 (wolframin)                        |
| 80149  | ZC3H12A | zinc finger CCCH-type containing 12A                  |
| 678    | ZFP36L2 | zinc finger protein 36, C3H type-like 2               |
| 161882 | ZFPM1   | zinc finger protein, multitype 1                      |
| 25946  | ZNF385A | zinc finger protein 385A                              |
